# Supplementary material for: A Systematic In Silico Search for Target Similarity Identifies Several Approved Drugs with Potential Activity against the Plasmodium falciparum Apicoplast
Source: PLoS One. 2013 Mar 26;8(3):e59288. doi: 10.1371/journal.pone.0059288 (PMC3608639; doi:10.1371/journal.pone.0059288)
Supplement: Table S1 — List of apicoplast-targeted proteins with predicted aminoacid (AA) sequences. (XLSX) [file pone.0059288.s001.xlsx]

## Sheet: Plan1
METABOLIC FUNCTION	ID	ANNOTATION	AMINOACID SEQUENCE
REPLICATION AND TRANSCRIPTION
	PFB0180w / PF3D7_0203900	5'-3' exonuclease, N-terminal resolvase-like domain, putative	MNKSIYIILLCVKYFLIYSKAYKKKNNNDVINNIQRAKNDLFFIKPSVKLNLCSSKFIHR IKSVNKRYVEKNEYIQQIDNDIEEKKKKKKTTSKRNNKSSNQINDDYETFLIVDGSSILF KNFFGMPFLKNDNDVNLSTIYGFIQSLNKIYNLFLPTYIAIIFDSKTSNNDKKKIYANYK IFRRKNPDELYEQLKIVSNFCDTIGIKTISSTNIESDDYIARIVDNISNTLKEKKQKDFS FVNNHQEKEPPPMYTYMKNNVYDNAGSIGTNKIFDKEPNHINGNINGNVNDHTNGNVNDH INGNINDHINGNINDHINDHTNDHTNDHTNDHTNDHTNDHTNDHLNDYEYYEYYNTNDDD HYNINDDDHYHINDDAYNNFYDNIYAEENVSCH…
	PF11_0074 / PF3D7_1106300	exonuclease, putative	MIAFISLWVLCIINVMAYCISLNKYKFIKSYNLYNKRKHQQNVLYGIPRMYKWLTSYYPT VREELINNEKQKSVDIFYIDMNGVIHHCTHANKEKLPIYDEHELFSNILQYLKNLFYLIK PKKLIYIGVDGVSPKAKMNQQRKRRFLSIFKINDNDNTSNLFNPNCITTGTDFMYKINLS LNKWFKILKKKKVFEFDVIFSGSDVAGEGEHKILKYIRENCKRDSNFKNYNHCIYGLDAD LIMLSLVTHLNNIFILRDKFKISNDLHNNMLENIERTQNTFNNDEYNSFNEPQNDNINYN EEGENIQLNEKSKTNESLVKEENNVEYENNEEINNEINNEINNEINNEINNEINNEINNE INDEINKEINNGINNGINNGINNEINNEINNEI…
	PF11_0306 / PF3D7_1129500	A/G-specific adenine glycosylase, putative	MMKNESTQKDKFNNIKEEEDVTLPNEQSDYHYSFLQRYSVELKKDLLNWYYKYRRKLPWR GDEPPFTTSVQLYENKKQVDIRCFFGNHKRDEIKIKNSKSDNVKNNEKIKGTKIMKIKKE HNELSLERCKRLKKEDKDEEKKYNSLSDSLKSENIKSLHDKINNNNNNNNNDDDVVDKNN CNSSLLVHKEEKKHNFINNLMYDKEHLSTKGYQIYISEIMLQQTKVHTVLNFYLKWMNKW NNIFDLAKCNLDDVLILWKGLGYYNRAKNLLECCKIVVDKYNGIFPNDLKLLKTLPGIGD YTSKAICIHLYNRKDICIDTNIIRIFSRITDTINYYNSGTLLKHCEKVSEILCSGESNYS DLSQAFMDLGSSVCNNSPDCSQCPINKYCMIYL…
	PFC0250c / PF3D7_0305600	AP endonuclease (DNA-(apurinic or apyrimidinic site) lyase), putative	MKITSLHFLIFHKNLNYVSSKVKAKKIFYQRALNNIYLCTIRTMIVDIAEIKKRDNHALD TQESQELVNKIKEIKNSDEQNNSNNNNNNSSSSNFCSNNNSPFSHKETKLMVKEEVPNSI VKNILNNNSCATSIINNKFYTQINNIIPVKPEAMKEENINVSTVNTENDISKEKKENSHY FCDEIKVMKKEYSKDDFVTDVKLEMNDKEEEEEEKQKIGQESTHINIKVEKDTFNECNNS NVNEKKRNRSVDIHNELSNKRILTEDVVVKCNIKNDVKIIVTWNMNSITVRYKNKKKWDE FMNFFNNLNADVLCFQEVRLPAMNLSEPCDNKNKNKNKNDGIRDRGKIKNSDQKSLADYE IMEQILNDDFKDYNAYFSLANIKYSGQLVLVKK…
	PFE0205w / PF3D7_0504200	ATP-dependent helicase, putative	MSFLLPLVIFFLFFFHLIKSYNINYHINDKTFFPYQQKHQIKKKKKNYIKYDGKGIILLK DSKEGNSLNFKVEDFLCESEKKEKNKNKESHGSFFFQTNTTFSELNIHKLLIENLKNHNI NTPSVIQYDLLKYYDEHNDNLQNIIIAAENGIGKTLSYIIFLINHILKKGTNKNTCTLIL QYNNLLCNQCYDLLKKLSKNVKAQIVNLKYEGIINIKNHLIVICTPVRLISYIKEDKENV FSTFFENLDFLIMDEVDILFDNPYIRNMKIIFDELNKLKNEKSVSIITSSTLCNKGKKSI YNNVIKYITNPIVIKTNYFHNIHPFINYHFIKASNYYIKNKVQIIKHILSKQNYKKVLIF CNTLKSSNTAFSLLKLHFDNIFLFNSTVTKEDQ…
	PFE0215w / PF3D7_0504400	ATP-dependent helicase, putative	MKSLFFNKLKNVGKKIKINFIQILIIFLVYVNLDFFKSNINVKAIHTKKNLFIPVSNEIF YFKKNVLIKKRNKEKRYTHSKNKGSNIFLNLNEENDNTVKERKKKIKYPEIGEYNDDVNH NKNNDNNGDDSESHLNDQGKCKFSDLSEINKNIVEFLENKKGIKYMTKIQSQSFKPIYEG KDIIGRSETGSGKTLAFALPLVEKLYKMKTSNEKFEEENGSHEEDQKKNIYDDVDNDNNY DNFSYGKKYQNREHNKDPSILVLEPTRELSKQVENTFKEISQFYNFNIMSIYGGESYTYQ ENKLRKGIDILTGTPGRIIDHIEKKNLSLQNIKYVVLDEADEMLNLGFTHDIERILSNIN LKEAQVLLYSATTPSWIKDISSKYLKNPFCIDV…
	PF13_0077 / PF3D7_1313400	DEAD box helicase, putative	MENYINKILFLLIFFIFHLNSTKNYKKTYRYIISFLLYFINILYAQKIWGNGKKQIRCCF IKNLYNNNRGIFRLLDNDIKRKYNIIYLKKKNNGFANNEHAFVKNTVFIERGQNDENKIN YVQGNFDENVKDIKYLSDMQKNFIYLLERNNNLLVHAKTSSGKTTICLYYLILKFFYNCE FIFKEDIEREEYIMKNDYIDRNIYESKNKSRKYFNQNKYRFIPYSEKYSEISDIKEYTNL MIENKCKTKLKKDEKVLILCPSKELCVQVAQNILSFMNNKNESLIKLFIDKDYKNENKEK QNFKEEECINKMEHIQINECDDHYMHHTSKHSVNNNKDTMDIEENKLYMLEHDNLNEDNS SSKVKKKNKINDNNNNSNNNSNNNSNNNNNNNS…
	PFL1120c / PF3D7_1223300	DNA GyrAse a-subunit, putative	MSFKFSIVFVLYLLFLLKFNKRFIFLKSEKITSYINTQIPNYSSSPPFFLKKEAKNNIKK CYFIKREGYRNIGTKNASNAFVLNFKSNRSTYTDNAFSCTSLCSEKKERKKVQDPYDLKA KKKEKTYELNDIKNNEKKKDDIVNASNDITNDKLDNINNNINESRKLIKGEYYDVEICEI LSKSFLSYANFLILNRCLCDYRDGLKTVQRRIIWSMYEINKGIDKKGYKKCARIVGEVIG KYHPHGDKSVYDALVRLAQKHHNNNLLIKGYGNFGSVEYNAAAMRYTEAKISSFCYDILL DEINDENVEYIKNFDGNEREPKVLCSKIPLLLINGCSGIAVSILSSIPCHNLIDVANCCI NFLINENIRDDELFHIIKGPDFSTGGIIISKYD…
	PFL1915w / PF3D7_1239500	DNA gyrase subunit b, putative	MNVRFFKSLSLFIFFVKGVILVVQAGKGNYANIYKKNNINIFNCMKRKYDKKLSSSVVNT NDKALYESSILKYYYLLDKYKKPNRKKIYGYISNVSRFPLEEERKRKKLEHMNKRNIYPC YNYDAKDIVILEGLEAVRKRPGMYIGNTDVKGLHQILFEIIDNSVDEYNNFECNTIKVVI HKDDSVTIEDNGRGIPCDVHEKTKKSALETVLTVLHSGAKFFDDEMDDEIDNNMNNTGNT NTSEKNNRDNISNNNNNNNNNKRTKKNSKESAQKYKYSSGLHGVGLSVANALSSFMKVKV FRNNKIYSIELEKGKVTKELTITNCPINKRGTQIHYKPDSSIFKSSTKHNSDLIKNRIHQ LAYLNEKLTFYFYDERSENKNSIYISKGNKSNE…
	MAL13P1.22 / PF3D7_1304100	DNA ligase 1	MNFLILVVLIKMVVCKIINYVRSDYNFMLSFLRTRKIFSHKKIYFNFKVSKNITKNSSSN SYSDILKCFSFPRKGTNDKTKENETFEKGEVKEEEEEKDKNVKRKIINESSKNKRAKVKN ENDVIKKGSLFNCVVREDEKVNDLSSPKFNPVHFNINDLYLSEKDKEKHKFKDSLLFTFL TNAFNQIEELKGSGTGSKKNVSIILSNIFRVLIYYSPNDLIPAVYITLNKVAPDYLNVEA GVGEALILKTMSEAYSRTESSIKKDLQQIEDLGIIAENCSCKMRTIFPLPRLTIQSVFHE LKSIPNLIGSNSQQKKREVIKKLLVSAKTSEAKYIVRFLQQRLRIGVNSATVVQALSYAF ILTRPSIPDDIIKRGKEINENLINGKLDGTNNL…
	PF13_0040 / PF3D7_1307600	DNA-directed RNA polymerase alpha chain, putative	MSLLFLLLFFLTECNIYWSFCVILKTKNPAFLPIQIKNPERHKPNNLKRFYINQNEGVKN RKYNNRDIYKFEGIDEENKDGKENIDEDYLKEYEEAYHKYDDMDDDERKRRGSENKMNWF EIRKGEKEREHRYNVYDNEIIKKDLKEIDLERVDKMNRSIGELPPYIYEGGKVYEGMPMD YKPEIYDFHKYNKYFDDLCKEKKSLIDSYQLDKKLLDDTYYDAKRGGPKTFGFRFKQIQP VKYHEGRAYTYFFMHSHDVELSPIFLNAFRRVAIKHLKGGRVTALRIPNMKHEFYCIVGV RENFFDLAQNLRQITFKNVPEDVDMDNYMIGKFRIKGPMIVVAGHMQLPKNVEIVNRNQY ICSVAAGSYLSMDVKIESIEEYVMPEYGSQSRN…
	PF14_0695 / PF3D7_1472700	DNA-directed RNA polymerase, alpha subunit, truncated, putative	MPFLVIISIWLHTIIVIYKCVHILKSSYIPNAEKLLMFERKNKRGKIKLILNKNKEEKSI RRKSLKKYIVYSINNDKEFIPINDNYKIFQKRNFIKKYHVKDEEIKEYIEEIKKNRASGY EPKFPEETFRTPDGLTNIILDYKYKNDNLRIHNYYFFFLYFLKKLGDEEQRKIKLRKRME GKNDEYGDSINDDVDNRMINVQEFLFLKKKGFFEGELYTWKNWVLLNRGEWRDTIVYGDE VDNNNNNNNSNSSSSSSSSSSSSSSSSSSSSSSSSSSSSSSSSNRSSNFCGDDNIYNVYN NYDDESYDIKTLRPLVEPKMKRMPIEYWGSFRAIDFNVNHYPIYKKLFDYFNKVNVNEND ERGKFYPFLFFPRFGVGRDRSGLGYGDAQYFGN…
	PF10_0369 / PF3D7_1037600	DNA repair helicase rad25, putative	MMNSLKDSSNYSPNLSHTRGSRKRSDIFNENYYAKNLKRRKLKAAKKLKDSTNGEFTKKV KKQLKDYYEMRFDKKVINLPFSTDSINIQQRGFHDYSKDMKLKKNHMNKPLWICSDGFIY LEMFNSCSKQASDFLITIAEPICRPELIHEFQLTIFSLYAAISVGITLDELLINLDKFSK NVLPNELISNITKSAESFGKVKLVLRENKYYIEATNKSELDYLLNNDTIQNARIYSTDNN NDKNMISLYNLNNRHRDNNKNDNKNNNDDNNNIDKTTSNLLNEDQKGKDCYVTYEAPVLD TTQLGFKISESEKQLMMEEKKHANLNANENSTNSAEVYSFEVNCDKIEEVKQEALQTMQR PLLMEYDFRRDKKNPNLICSLKSHVQIRYYQEK…
	MAL7P1.151 / PF3D7_0727300	DNA (cytosine-5)-methyltransferase, putative	MHKIKVLELYCGIGGLHYSLLQAFNNFVHANKITEKKCDTYKDGIHNHMSNNKSIEIHKY HDCTLTCLNDLFCFISVDLNPVANQTYFHNFKDSTILLTQTRDVHKFFKWKCDSMDKQSN GSTHNEHEKTQKKKNKKKNNDDDEKNNIFNINKNYIIQTDINNIMPEFLNNHHFNILLIS NPCQPYTRQNQKFKEINLDLLFCKNNEYKQNVNNNISNDNNSFYSNHNGDENHQFNVDNI NIDELNNYIYNDKDERTKSFIHICTLLTKVDFKNLPEYIFIENVKNFELSSSFIYFLYCI KNNYSFQTYLLSPLQFGIPNERLRFYCICKKKNYDFKHANNLSGINYIKDKNLNLYTNSL IPKNYLHKNNIHEQKNNQGDNYNNISCENVIFY…
	PFI0525w / PF3D7_0910800	nucleotide binding protein, putative	MNVFTKRSFFSFFVGSLVGLSFSYVLTKKKSINEFIKYAIKYVTHKKGKKNKNNNNNNNN SIPDECPGLDSEHAGKSKACEGCPNRKICNDPELKKEKEKERNQIFNEVQENLKNVKFKI LILSGKGGVGKSTVAAQLAFALSYLNYEVGLLDIDICGPSIPVLTKTIDHDVNYSMNGWV PIYKNNLSIMSVGYLLPNFDDPVIWRGPKKNGLIKQFLCDVYWKNLDFLIIDTPPGTSDE HLTICSYLKDNLDGCLIVTTPHILSICDVKKEIEFCKKTNIPILGIVENMYQPIFVSNYT VQKMCSDMNVHYAGKVTFHQNLIEACQQGVGCCDIDPYSPSSKELYHLCSILIQQIQKRY MLLQMGSNNDNNNLVQENNHQNKDNTRNSDNQK…
	PFB0890c / PF3D7_0219500	pseudouridine synthetase, putative	MICSNLSLLRYVHLVYYFIIISFCIHNNISCFNVNLTKTNEDANIIRLNKLISMKRNISR RKSDEFIKDGKVKINNKIITNPGTHVHIGKDSLRIYDKKIKLTNIINMIKQNENKLHKWI VLHKPKGLLCTSNDEKNRKSIYTLFPEEMLQKYRLVTVGRLDRNTSGVLLLTNDYAWVNK LTHPKYQRIRTYRVHIEGPVKMNALKELARGIYLEEDEKTQPKKIYNYKESREKSNIDDK KKKKMSKMKKKTNPAFIEILREEKIKIKEDTKKITVLNISIKEGRNRQIRKMFQQINQPV IKIKRTSFENITLKNIYFPKQYRELNQKEVNDLKLRNF
	PFI0685w / PF3D7_0914000	pseudouridylate synthase, putative	MFYFLIIFILLTSLLNKCFKIMKIVIPQTSGLNIVDKKFEPKYFVKNKLRFVSPYVYTYK LFSKKRWVGKKIADVMTSEFCAYDMNYFIESIKKGYVKVNKQMVSTDYIIQSNDFIEHKL LLFEKPVLCNKIIILYEDQNFICVYKHSSLPTHPVGSYQYNSLLRILQNYISTSQKIKQD EHDQVIAQNEKENYNQDVSQDVSQDVSQDINRDISRDVSQDVSQDINRDIRQDINQDISQ DISQDISQDMNQSTNTNTNTNTNTKPVKVEEQSEHVIKINFNFKKENFGFMLDDIKENPS CDDKKIKIKNDHISNCTNNNDNYNDKHFTYDDDKEQTYYHKNVTQNINDPHRKDEILNIS QEKKKRRKIKQANIINNEQINNMEIEKKQNENI…
	PFL1380w / PF3D7_1228500	RNA pseudouridylate synthase, putative	MFPSVQLKKTILLRLSKILSLSSVTSRNKAQELIKNGDIKVNNQVVNQNVFIDVNSKIQV KDKPIQVDICTKLWGIYKPKHIFCNTEKDYTYEEKIHFNKMIEEKKLLDRHNNNDNNNLL CVNNNNLNKEENYKILSSSNKMKHINRDNNLLNVNSYKYNYLVEKGQKNKERNFFLSELP KERSTCKHTNIITYNKLNMNIYDYIKKQNMLYEKKNHVTNYIPEHLIIINSLNSGSEGLL LLTNDGDFAKNLKDIQNNILTTYLIKVQEDLCIDKIKLLRKGCFINNQHIYPVNIEIIKS KHTSKWIKFTYVEKSHNYLLYLFSKYNITIRKCKRFSFGPYKYTDINTQFLMPLKIHSTI NHFITTHNSKLILSHPKGNITKQQNQNKFLYIN…
	PFI0920c / PF3D7_0918800	dihydrouridine synthase, putative	MQIKFPFLYVIIYILLIIIKLNHGNSKLNYNKTYTHGRVYNNLVHTVNQYNKKRSKKEIE NKYIRNKNIILPSSNTEGRNIYISYLNKQYNNNNNNNNNCYYKNNTKKRYIKKKNYKNFY YYIYCFNTSTNSTFLQKKINIQNYIYKKILKCSNMSILSEKSIENVISPCEKKYKLEDII SNGINYDYRKINEKSTTPFIQVAPMINVTNRHFRAMVRIITKRAQLWTEMIVDNTLLYNL NNLEEHLGFDNNEHPIVCQLGGCDMNSMSEAAILVEQAGYDEININVGCPSTKVANKGAF GASLMKNPEQVRNIVYEIKKKVQIPVTVKIRTGVDNYDSFDFLKTFIETVSSVGCNHFIV HARKAWLKGLDPKQNRKIPPLEYYKVYDLCKLY…
	PFE0435c / PF3D7_0508800	single-strand binding protein, putative	MGKRMLCIVFPLLIYFNYVLHRTYGYIIGDVKVHQLNNIINKRIIKSRKISMFKINLQND FNYENKRFYNNMNRNVMNEKSLNKIMLIGRVGCEPDIKILNGGDKVATFSLATNEFWRDR NTNELKSKTDWHRIVVYDQNIVDLIDKYLRKGRRVYVQGSLHTRKWHTNDMNSQPKQITE IILSYNKGDLIFLDDKRNFNQRNNSNNINSENQQHINNEHINNNNINNGNDFMPLNSNDK IIEDKEFTDRLDDNNEENNFQSNSETFDKQEGIYDKMNVQEFEE
	PFL2395c / PF3D7_1249900	apicoplast dimethyladenosine synthase, putative	MIYYSFKLRWALFFFLLVTLFKINNVFSKRKRKTYVKNVKWYPQRINHYYINGVVFPRKR RRLATFFVFLGNNGKKKNKRNYKFNIKSKLNVEGENKNEDDQKNEGDQKNEDDQKNEDDQ KNEDDQKNEGDQKNEDDQKNEGDQKKNEYNNKMYNTEPIDDKNQFISRTFEGINIFPIKQ NEKDQDYLKTKLPSKEFKPKRSLGQNYLKDTNIIKKMISAIEYNVEHHLFQNKKRMSVRK EEDKKKKNKKKKINNNKKKKKKKNTNNNNNNNNNNQNNNQNNNNNNNNQNNNNYNNNNYN SPNQEQCDDIKTKQYVKDNVENNKKIDEQQNCCKESYNEDKEKNNHNCIDGIYTEDIITK KKKCNNDNITEEGENMNVQNLESLQNDGNGVIE…
	PFA0580c / PF3D7_0112000	TatD-like deoxyribonuclease, putative	MKLVFHYIKYINVLFYISIIFLKSNSLKIYNDLRYISTVNKYKVLQIKKRSNLKKNHNIR KMEDNESSFIDIGSNLTDKMFDGVYNSKKHENDLQNVLNRAKNNNVDKIIITCTCLAEID KSLKICETYDPEGKFLYLSAGVHPTNCYEFIDKNKHEEKEIIAKKEYEEFIKYFKNEQVE NSKMENGNKKICDGEKDMNNLNEILLEKNLDTIPGFKYNEKDKEYLENLKNKIIKYPNRI VCIGEIGLDFDRLYFCSKYIQIKYFIFQLKLVQMFNLPMFLHMRNCSETFFKIVDIYKFL FEKNGGVIHSFTDKEDIVHIIVQNYKNLYIGVNGCSLKSLENINAVKKIPLNLLLLETDA PWCGVKKTHASYEYIKDTYEKRAYTNLKKIKNI…
	PFE0420c / PF3D7_0508500	guanidine nucleotide exchange factor, putative	MYEQDDEDKDIHKYIFPFFPKISTGLDHYACVAYYKNKPSIFTWGGNSCNQLGLGINNRF VNNPTVVCFFDSFIVASICCTNYATFVLVKKNVNDIGCSVYSFGKGNNGLLGYKKKRELP NFLEHEEKKNIQKVKEQMLQKVNDPLNQMVLDAFGIKKKEKEKEKKKKKKKNDIKKEEKE ENNINNEKKNNNNNNNINSEKKKKNDINGHEAKYVQNKKFFYNEHNFKNDIGLPSDDDIY DDYNISGDESLLNFEADNISSIQNEDTNMDEDVYNNIVNDHTNEDRQSDINETIDKHSND NDYDDEKKKEKMNIYKNKEKLYSNIKENDNKHDWFTPFPMKIVFPKKNTKIKFISCGDMH TLAICTGGVLYSWGYNNFGCIGNGTNQNVYEPT…
	PFI0700c / PF3D7_0914300	Met-10+ like protein, putative	MFFKALFLSLYLFFFISYAEIIFCIRIKRNNLYNFQNMTNSLNIKNLDDVKEKVKYEKHT YCLLLDKYKVNKILKNKRAKFWLLDIYKFPSVLKYKEYKNCFLQNDHNDKNNHMLNFIYN NYLKKRNHQNVKNESENGNYNNDHNDHQTCNNMNIFFSNEYLKSLSNFNEEDFRLIPLND FFNKILLELFYKQREEIIHDDVIYSKNNIKSLSHVFNDNSPEQYRQKEKQQQVGNIIMCN SNSPEQYRQKEKQQQVDNIIMCDENLCETLIKDDEINENDDNKNPLENLCEDFKKDKDDI ENIYNMHKLEYIEELFELIKEEDIKFQRVKLEFGYDNMNTSEILRKIFPCINEIIHKFEI IGHIAHLNFCDKLESCKKIIAEIILDKNKSIKT…
	PFL2030w / PF3D7_1242200	queuine tRNA-ribosyltransferase, putative	MIKLKLQIFFVYIILNILIVLVISKNVVYNEKKLKNKNCMLPNRRHKNDLLKRQVKNRKV ILFNDHNIELINLKRKYNKRTKYKNLDAFITNLKVTHVVNHNKSIITYVKKKKLLFSNKI YNHFNYPGFDFSVLKENNNEQDKSRIGIIKTPRGDIETPNFLFCATKGCMKSTPIDFIKK CNTQVILSNTFHLLIQPKPHIIFQLGGLHKFMNWNSPILTDSGGYQIFSMSFGSVSNEIK RKCAGTPQITKMSIKNKKKDNLNNEEDQVNNNFINNNCENNMYNKKGKCLSNNNNSNNNN NNNNNNSEKSVTDTNNLNKQIILKLNEKGAEYKSYYDGSIDLLSPESSIQSQYLLGSDFI LVLDECTPYHVDKIYTEKSMHRSHRWYVRCLAE…
	PF13_0109 / PF3D7_1319300	N2,N2-dimethylguanosine tRNA methyltransferase, putative	MIHAKENNWKKGSKRKRHFKEDDDKSRNSHICNDKNEEGNNTKESTNSLNKFIYEGSVKI KNKKNHIFYNKAQVFNRDMSIVLIKALEIFMKEKNKNNEKIIFRGFNIIELLSASGMRSI RYAKELEDTINHITTNDIDKYACKQIKRNFIRNNIKKEKYTILCNDANSVMNILNVDNMY IKKRNNKKLDIGFTYINNINNCIDYFKEAFKFLNFLTNYNRRKHNPLENVIEHDSDSTTF LSNDDEIITTKIDNSGEDETYIYEEKYDKNNIHCNEQHNRNVEDENKCLDDIKKKDIIKK SKLIERYMFDIIDIDPYGSSIEYLESCLKYGRSNFFILITNTDMRILNGKFPDVSFYKYN SMIFSNKVNYNNEFSIRVLFYKIKIIASKYKKC…
	PFB0855c / PF3D7_0218300	apicoplast RNA methyltransferase precursor, putative	MNTKCLNKYIIIILLFSLIIKRYTSLNRYHNVCKIKNQSCFLNPCTHKNNDKRNSYLYTH YTRNNSSINIRRNNFLDKQNDNISDYIYGLNSVYAVLKKNERTIEEVIVNKNIKLNRKIH KQNYEYIFDELKKRNVSIQYMEKYKMNELVGGFPHNDIIMKTHYRYMNNYKDFIKNIKHL PNKNNIFICLHDVYDNMNIGNVCRSIFFFGGHTIFLKKKKKVNEKKNNVKIDTPILHSSV GSSEFLNFYHINNMANFMNHMKLNGFTIYSTSCHKNNTSCHKYINLNNIKIRENEKILII LGNESKGLKEDILENSDYCVYINNLSYNENTQFHIDSLNVNNVCSIMLNHFYSI
	PF11_0212 / PF3D7_1120500	tRNA nucleotidyltransferase, putative	MNIFGLLLLNLLINVIFILCNIKRKNKFLKRQLCSNELKHLKYKNDNMIRKGILNYKYKY KYRFFYIIIKKNYSNKIKRKNKIKQIGVMENINNINDNNKWRCLSSSNHISSNMMGNTFY ENVYINYLKDYIIDEKEKAMEKNIVKDEEQKKDKIYFPNSNNMLNAKDIENVIHERIRKE EENLFEFLKSVNERYNLNCTLRVVGGWVRDKFLNINNDDIDITVDNMKGAEFCNYIKEYI KEKENKNFNFGIIKINSDQSKHLETSSFNLFNFQVDIVNLRNEKYTEESRIPEIVIGTPE EDALRRDFTVNSLFYNLKNKKVEDYTEKGIFHLKNHIISTPLEPLATFLDDPLRIVRCIR FCGFFNFFLEKSIFNVLKNEDIKKAFTKKISKS…
	PF13_0176 / PF3D7_1332600	apurinic/apyrimidinic endonuclease Apn1	MFFSFYHSSFSSLSSFFFSFFSLLLYMLVLLQIFPKNYYEAGTLSIRVIRKNTFNHSYNN IKNIHYIHCGYPNIFNNCRNYYMNNFYNNNLSAPFKNKNNYMHIFFKIVEGNKKKKREHP FFKYLFHMNMLEKSGDKKNTVISKITESCQYGDIRKYMNMKKESLEEGEKNKSGEEYNKH VEQNNIKDEKIHFKDGTFIKSKEEEIENEKGGTICLKKEIQKNVLEINNNTYNNDTKYLS NPKGVTNKSKQSKKEIEKKKKKKNNNNNNNNNNKIKSEKSANDTKNIPPIPKNTEDRWND YNKIKEYAKISNVYLGAHISASGGVQNAPINSFNISGLAFALFLKNQRKWESAALTNENI KQFEENCKKYNFDKNFILPHGSYLINLANPDKE…
	PF14_0112 / PF3D7_1411400	plastid replication-repair enzyme	MLLYKFYFLYFLLVHLSLCIRYRNQNKTDSYLKTNYKLLKKRKKYENRRYKFPKNRKGNN NNIYDAINNNNTNNIYNNDTYKNRIFFRNEKNDENFIKTNKYSYYEKRNKIKLNSATSTF VSKYYKININDVYNYLHRKKYEFIETDIKITLKYCPFCPPHKYKYDNMYKHEIFKNTGNS YCHRCGYKGSFYDFKLKMGDLITSNFESTVVHNNNFYEEEEEKITLNDVKVYNMNLLYSK EAENARNYLMNVRKLSIDTLKKFLIGFSVMEFQSFESSGKFEKHECIIFPFIKKVDEINM IETNGINSNMNKMNNNNNNNNNNNNNNNNNNNNINDNYEVVRIKIRSLKDKGYMRLYPKN VRNEMKLFFFGDHLIKNSEEIVLTEGEIDAMTI…
	MAL8P1.19 / PF3D7_0827000	DEAD/DEAH box ATP-dependent RNA helicase, putative	MKNKKKLFGP SSSNNTKSNK KKINKSKNKS KSKKNEKNEK RINIKKNNGL KKSKEDVSKR KDIDLLQNNK KKNILIKTNK NISKNKNGTK RYQWLFSDKD KKKEKVEESD LNNYSSSCSY DDKKKEKKKF VLYKKKKNKS NNNSNNSNNK KKKKKVILNS FQQLGLSENM CRSIASNLKY NKPTNIQKLC ITKILHRRDV ICISKTGSGK SLVYLCTLID ILKEHNKYYG IRGLIILPTK ELVIQIYKLC KKICKNYFHL NINIIIGGVS IIKQFDILNQ NLDILLCTPG RLSFLLQETK LSLEKVEILI IDEADRLLEL NYYNDMNVIY KSLNNTSKQT ILVSATLPTN VENYFKLKLN NPD…
	PFI0230c / PF3D7_0904700	bacterial histone-like protein	MYVILYCVLFLFQVVYSRRAFINVHKNNIINNKLSVNNPYNKNALYQSSSKIPMSQAITK KQIIEEVSMETKENKKTVEKIMNGIFDNIYKHLENNEKIYIHKFGMFYNIFRKKRCIKNL RTKEDIEIESSHMPHFKFSKVFKELIKQNVKVKKGKGVSTNDHDLDEDDMNMDNINESFK ENVNEKLIY
	PF14_0051 / PF3D7_1405400	DNA mismatch repair protein, putative	MFFMWLYKYK VYIYVIFFVL VENTMSMKKN LMFTCFNKKK FIYVKKNVLF LNNKYISNLV YTKEDDIYKI NEISNVIGRN RKKKNIIINN DEDNDNIDSK NNELGDNIIS SNRYMNNVFF TNNKNTSLEV RNNNNEDGGD DNNNNNNNNN NNILDVSYNH DKYNLCDNEL QLYKNKCKIP LYWIKKLDNL KNMNAINCIE YLKDDNLLYF DNYKNKGLLK FLNDEKRKYN NCIILSRVGD FYETYGLDSI FLIEFLNIKK MNNRLSCGFI KSSINKALNI LTNNNLNVCI YEEINEKSLK MKKRYLSQIV TPEFPIYLNN IQYYNKDEDI LQNGNNNNNN SNNMNSYNNM DKCLDNGNMN ALS…
TRANSLATION
	PF11_0065 / PF3D7_1105400	40S ribosomal protein S4, putative	MGKGIKKHLK RVNAPSHWML NKMGGQYAPK TSSGPHKLLE SIPLVILLRN RLKYALTFDE VKMILIQKIV KVDNKVRTDC TFPVGLMDVI HITKSNEYFR LLYDIKGRFV PHRITNEESK YKLCKVKKIL LRKGRLSIAV THDGRSIPYI HPDVKVNDTV RLDLETGKVL EHLKFQVGSL VMVTAGHSVG RVGVISSIDK NMGTYDIIHV KDSRNKVFAT RLSNVFVIGD NTKPYISLPR EKGIKLDIIE ERRNRLKALN N
	PFI1585c / PF3D7_0932600	mitochondrial ribosomal protein S6 precursor, putative	MKEGIIRPRR YKSFFLFFQN VRGYKNADKN SVYVLENKKK YINKNKNGTR KNEIYGSLND YIYKLLIRRF KRKKEKQELN IYKNVQSAKS SYNIDLLFSC NYLISDIKKK IAEYIYELKL IEAQNFKVVY LGKRKLVRPI KKLTEAYYIL FSFEIYPSMI EEISNKLKLQ DPILRFIITK NEKKSKSIAF EESEPVKNGV DKLEQSFFKK AS
	PF14_0132 / PF3D7_1413400	40S ribosomal protein S9A, putative	MFFNHVKSYI ILFILFCSYY INGRGVNRIY KNCGRKKLGN IFCCANIICV KERVKKIKHI DRWEYKRKKR KNINIFLYIP IKKDINKMKY YNFRNIVIND FFFFINKYVC ASKIINIHSK CRKKFVLFKK DKGSDKSNNA LKKKDKKTFS EEEIEELRKK AKEKSQANRS ISEESKRKKS IEKGMKRKRY IKNQKQVKKK KSTSDEEEKK KKELKDKDDT KENVDDGDDI YLRKSKESKD KIQKDEDLNS YIGTIDDFEK ISNVTKNIIN EKEVEYLQKI IDCDDALLKY DKREKNVKLN IEDTIFDEGN YMEHYINNIS KFRYDIYNLH NKNEFDRLTK YLNYQYVEEI PITFPTDKNY HIK…
	PF11_0386 / PF3D7_1137500	apicoplast ribosomal protein S14p/S29e precursor, putative	MLSFIKLLLF FFNFMIFQGK VILCVNHKSS DLSLFLYSHR IYENKKKNHV RKKLSILNLK KRLDPNDKYT VIKRHESKIQ RNLKRKYMIE RYKEKRQQLK KYISEASSPI EYVYWKYKLS TLPRDSCPVR YRNRCAITGR ARGYYSFFGL CRHQARSLIQ KMFFPGFVKA SW
	PF11_0072 / PF3D7_1106100	apicoplast ribosomal protein S15 precursor, putative	MLSFIKLLLF FFNFMIFQGK VILCVNHKSS DLSLFLYSHR IYENKKKNHV RKKLSILNLK KRLDPNDKYT VIKRHESKIQ RNLKRKYMIE RYKEKRQQLK KYISEASSPI EYVYWKYKLS TLPRDSCPVR YRNRCAITGR ARGYYSFFGL CRHQARSLIQ KMFFPGFVKA SW
	PF14_0205 / PF3D7_1421200	ribosomal protein S25, putative	MPPKERKTKE QIAAAAAASG RTKKKKWGKG KNKEKLNHAV FIDKSLHSKI LECKNMKVIT PSAIAEKYKV NLSVARAVIN HLADKKLIAE VCVQSHSQKL YTKVA
	PFL0500w / PF3D7_1210000	mitochondrial ribosomal protein L1-2 precursor, putative	MTLKNGYRKI IKILFIFIHI FHITIESFVT NYLCTINEAT HYNNVFYKNK NRTILKDKKY LLEKKKKNLF NVQPSTVITP DNETSNEIIK KVKLKKKDKK IFKKYKDFLD ILPKKTNEYT LMEAIEKIKT LAIHKFVESI DIYLSFNPKK SKMTKNDNIK TFITFPHNLK KKREKKVYVV TNAKLQKIAS QSGADVVGED DLINKIKERE IRLQKRNNNF LICTNDCIHK LTRVGKEIGR KGLMPNEKCG TLVSEFLLPK HVKLFKSENT YIFKLNKLNT LNINIGDVYM SNDEIRENIN HLFEHLENLE FFHFNFKHVK TIYLSSTMGF PFKIKKNSL
	PF11_0337 / PF3D7_1132700	mitochondrial ribosomal protein L2 precursor	MNGLQFLLRI NKNIIRRFSS LYSPNIKKNV PDYIDFETFY PKKEIKPDIM TAFTMAKQQR LEKLLENNPL VLYKGRVIKK LSCPRIKNSG RNNVGKITVR HRGGGHAQRL RFIDFKRSRK DIYSTVLRIE YDPSRSAHIA LIQYEDGVLS YILAPLLLRP GDKIIASKYA NINPGNSLPL QNIPVGSIIH NIEMRPGAGG QLIRAAGTYA TIISKDNEYA TIKLKSTEIR KFPLQCWATI GQVSNLERHM RILGKAGVNR WLGKRPVVRG VAMNPSKHPH GGGTSKKHTK RPKCSLWGIC RDGYKTRSKK KPLGLIIRRN ICGRLQKKYG VKS
	PFB0545c / PF3D7_0212200	mitochondrial ribosomal protein L12 precursor, putative	MKRNKILLRR YFSSDNIFNK NVKNGHTLLL YNKIRNNLVL KKYVSSSIFD VFDKIKDSNN KEHDETTDEN INKKRKPSKK VLKLVDEILN LTLIEAADLC DLCQEKLEGN QKFNNSFFIN RNPFPHPSNF FGANQNIFPQ PTAQNAMNIN TNLVNDHTTC TTDSTLYSKE EKSEKKKNEE KKNTKSTFNV KLEKFDVKNK INTIKEIRKI TNVGLKEAKD MVESAPFYIQ KSVPSEKAEE MKKSFEQLGA TIILE
	PFD0675w / PF3D7_0413800	apicoplast ribosomal protein L10 precursor, putative	MFIKKINIKY LSFSLLVYFI YNAYVYNTIK LQKCFNYEHK KGNFLVSSLV LDGKDIKGRR NKGIINFIRS NIITTNKFKL IKKKNVHKHK NFLLKSRKCD GYRNTKEGKE ETIRKIKRIL KVTKLLIQLN SFKLSPNLRM DLLINMPRPH VRMHMVKNTL MKLSVKNTPF EAITPYLKES NVYLFIMNEN YISFTLYRNK MFSSLYKDYK LNNFIKVSVY ENTILDKKET EDLINLKSHK VYFGHVVNKI NNIITSIPNS ILQIPSSIAR GIYLNTQKNQ
	PFE1225w / PF3D7_0524600	organelle ribosomal protein L7/L12 precursor, putative	MKSVGSKVTK LIGKILCKNE KKNRRRKNNK TKDCSLFFII KKQSCPLLYI ILSILYITYC MECIVCMKLS KNDNCLNRNK YFFLEYKLNN DYYGKKSYVN NIRKHISKKD NVINNHKNFK LKSSKVDEII ESLKNLTLLE ASELVKKIEL TFSVDTKQNL NASNSSGQEN KQNESDGKEN EEDEENKVYD LILENIEPNK KIPIIKIVKE IKKDLNLKQA KDLVDNLPQT LFEKVNKETA DKWKTKLTEA GGIVKLK
	PF14_0296 / PF3D7_1431700	60S ribosomal protein L14, putative	MPRVELTEEE KLYISKKNLL FKRFVEPGRL CLIEYGPYAG KLCFIVDIVT ITRVIVDGAF ITGVPRMVIP LKRLKLLKER IKINKNCKSG FLRKTVNSTK VLEEFNNSKL GKKMIIKKKR DEATDFERFQ VYFAKRELKK KMTTIKNKKN GENKKVKKNV QKVKA
	PF14_0270 / PF3D7_1429100	apicoplast ribosomal protein L15 precursor, putative	MNYFLFFLFC SWILIKGYII NKNEVKYFNP LSNKNRIKEK YKHTYIPAKY QNKLYIFKEE EVEEKYNTID TINSLLGKIK RQFNINFDLE NERKKIEEEK KKKKKMERDN QSEHEKNELK NFFGTMLDGS FKIGRANTMF KELKEEKKLV DLKYKRLISK KLKLRREQLK KIEEEINNGT YKSPYNEEQR EFLQNVIKEM EQAIEPINKE IEQIEKNRFL VFDEKNDLLV KLREQIEKKI DEVNMKYQEQ AIKLGIKKIM DDYYEKTKTP LVWDLTQMDW PKAIYPLFNN MKLKADIYWE STVVGGNREK NEYFFSPFNL PSLGEKKKRR KGRGVGSKRG GSCGRGMKGQ KSRSGGSIPI GFE…
	PFF0650w / PF3D7_0613400	apicoplast ribosomal protein L18 precursor, putative	MYISFILFSI IFIFLGVIEN FIINKRVLYK PNFLLYSEKK NKKKSTPEQV TTRVNKDLKE KKRKRPRSKI LECLLKEKVE KVEKVEKNSD ENQCSNVDKE IREGKRVPRL RVRNTNNHIY ASIIDDYKKY VLCSTCSRDA TLSKILGTYR RKATNRVINN GRTIKSAWEI GKIIGKKALS KGIFKVRFDR ARHPYAGKVE ALAEGARAVG LLL
	PF08_0014 / PF3D7_0827500	apicoplast ribosomal protein L21 precursor, putative	MFFFSSKNKS FLLWASFMLI YFTNISIYVS KIHHHGLNKK IYNLNFVSNV FKYNARRRGN SLNVLINSPA QVKLSEMEDA KDRSGKYCII EICGKIRWVE EGRFYDVFRI KQEENRNIYL NRILFYSNEE GNIFFGRPFL DNVRIHATVL NHFRGHKIYR LKYKPKKNYK RFYGHRQEMT RIKINKIEYN NELLGQEKRI YNFFKDDSLY YILNRIHNIV RPSLELKHLK KNFIEYINSF CSLKFETFYK HKGNYKKEKM LRNILKTKKL SKRPEVIEEV KKIEEEKKKQ RLTKCDPLDD FDPVVNEFMI KEHFYS
	PF14_0642 / PF3D7_1467400	organelle ribosomal protein L22/L17 precursor, putative	MIRKIKLIII MLIFQVLLDE IILVYNLSFS DKKKYDLAFI KGDSNKIMIR NNSLRNNTII KKTCEKDKFV LNNICQTKEE NKLVDTISSN DNVTMDSNNL LYDDMDLFEN DGLQLKQWYF PEKVKEKWKE KHIENVRDNY KKVLLNNKYN ELFNMYRNIK KNNIENYKKR VKTNRINPVI YVKKRLVSAT AKYIKMSFMK TRKILWKIRY MPIIKAFAFL YYYGTNKYTV NIYKCIKSCL HNAINKYGRN NIKPVFHTLQ ANMGGYTKKI NIRARGKTDI IREPHTHIRV VLEV
	PF10_0332 / PF3D7_1034200	apicoplast ribosomal protein L27 precursor, putative	MKNKVVIIYF LVYITYVILA KSKNDLKVTK AYLRYGKNDQ NIQNRKREKR THMYLNNSSL LSSKNNNMNK TFFKYNKFID QNNDKEYFMK TFFKNGNIIK FRYTHELWAK KKGVGSSRNG RDSNPKNLGV KVLGNNFAHA GNIIVRQRGR TFKPGNGVKQ GRDFTLIAVK SGKVHFFNRV VSIIDVSEPK PLTFKDIYQE NPTIIGLSKM WMSA
	PFE0145w / PF3D7_0503000	organelle ribosomal protein L28 precursor, putative	MQITNKIYKL IKYVYILYII IHSNFIFPKV ILTQINKNKT NNILKYPNYF YVISLYRKNV RFKNNNVLNK SVTKFALNTK KRHKEALAIR KYRMTGPSSI KKHYGFGAHK RINKVTMLPH KEIKLPIRRC AILGKMDNWN ARKISKSGVR THRIQRLNLI NKRIFFEEEN RFIKMKVSAK GLKTIKKYGL AYCIKKFNLD FSKKKYDAGY SSRRRKKKTQ ELNQTNSERT NVTNENTQQS VEEVDKIMDK LNLDDKKIHK DL
	PFL0400w / PF3D7_1208000	apicoplast ribosomal protein L29 precursor, putative	MKHIFWYFLF FFLIKIYRVN GVHIKGRCVS FINNKLNIIN HKTYKSTNPL FCYKKRVKAK ELRKLTTEEL EKEIIKCRLD IQKFQQQGFY DIHNYNVFYE KNARRKLAQL LTIYYQRYLD NNIRIKS
	PFI0375w / PF3D7_0907800	apicoplast ribosomal protein L35 precursor, putative	MKCLLVKLFM LIFIRSYTYA IKYKINKAAC MNKVGGIDIY ANIKYNMKKK EKKNINKKMN IYNNMIRKTN SLHKNFIPEQ LVLFPRNKLL NEIKYFYISF TYHILKREKK TKIHKSDFIL HVRGCTNIKP KTNKSIAKRF KLTKNGKLIR KKPGRNHFLR KKTSSNKASL RKTTTIDSGR IQKKYKSVIF K
	PF14_0658 / PF3D7_1469000	translation initiation factor EF-1, putative	MCSVFITRLS FDFFVFLFFC FFFLYFPSEE IKVEKKTFSF LNFNNNISQW KNNKTSRFFH KISWNKKHIK NNINHFLRDK KGVHILYEKN ENVKNEIPKT KENDTFEMNG VVVECLANTN FIVSIPNGEK FLCFISGKLR INKVKINLGD MVKFQIHKLN FEKRRGKIVF RYLQHTSLKK KK
	PFC0225c / PF3D7_0305000	elongation factor (EF-TS), putative	MKLFYFFLLS FLSSYIIAFS FKSTQSAHFI LSVGRCNENY GNNIKKNRLY STNNDHLKLL KYVREVTNAS IQLCNKALKE CNNDVDKAIE HVRKNTKSST FVSTNIKVKK EGLVASQIKD DKIVLLELLT DSDFVARNKM FVQFVYSLLN VTLDNDLSVG NCKNAGDNKN SEDGYTTSGN ILSNNNIMDE ILSLPYVDEE NKSNSTMREQ LNYLRNIFRE DIKIGRFSKY SKKNPNEFLH YYIHNKLDDH VGLSGVLLVL HINNLDEILK TKKEDIVNFA NDLSMHIISA KPASVSIDTL NPKITKKEMD IIRDGLKDMK KPENILNNMI QGKMKKFYSS IVFLEQEYML DETKRKVSQV IKD…
	PFF0115c / PF3D7_0602400	elongation factor G, putative	MIKLFSSKRY NNNNKILLFC LVILILYKYT YSLHNRWNKN NNVYLSNGKV KREKRNGRGK LYILNRYVRN DIIKPHKNII KNIFRLKLVN GSTKNVELEN YRNIGIIAHI DAGKTTTTER ILYYTNVIKK IGEVHEGLST MDYLDIEREK GITINAAVTT CYWNGSEKNL EDYRINIIDT PGHVDFTAEV EKSLRVLDGG VVVFDSSEGV ESQSETVWKQ ANQYNISRII FLNKLDKVGA NFEGCIEEIK RKLNKKILIL YVPVFEMSKF ISTIDILKEK MIVYKNAHDF IFEDIPKEHY NLFLKYKNLL FEQIAENFNS FLDNYLNDKA MNIQEIEYYI RKLVVEEKYN VVMCGSALKN KNV…
	MAL7P1.20 / PF3D7_0704900	peptide chain release factor, putative	MNLKYNLFLT LSIFFLELLI MSIFVECRKN IRGLNKCLFL YKGVRNIRNR YNLCSYVNKD VENYSRYFKN SCSLILSSGT GGTEACDFCN MLYNMYIKYL CRIKNRKNIK YEVIDISKNE VGIKKVEIKI DGEYSFYNFV SEKGIHRLVR NSPFNAQNKK MTSFVKVDVI PTLNFNDLNV INFLNTAEGV GSSSSSKLTK ESSDKKQNKN KHKQLKESDN NNNNMNNSYN GGNNKMNDFV INKSDLVIQT MRSGGKGGQN VNKVETAVRI LHKPTNISVK ASSERTQLLN KRNALKRIYE KLLYLQTEAL KNKKYELANK SLTHFGEQIR NYVLYGNKMI KDTRTNVFST DIDKVLYQGE IDI…
	PF14_0265 / PF3D7_1428600	peptide chain release factor 1, putative	MKKLLFFFYC YIWFDLFVHV SNFYIKPKNY YTHKAERTKK SVLKRYSFQL YNKKQTDLYN DNKNFIRIEF RPGVGGEEAF TWSKELLNTY KLFAERNKCK VEKIQDISDS LVISSKENLR IIKEDKQIEI NLYDLFKNES GIHQVKRIPK NDSKNRIHSS TATVAIFFHK KEEPKYEINL KDLKISTFRS SKPGGQNVNK IESGVCILHK PTGIQTECQE ERTQELNKKL AMKRLIQKIQ HMESKEKENM VQHERAKLIK ESNRSNRIRT YNFFRGYITD HINKKKIDLI YFEKGKLEYI LNIF
	MAL7P1.20 / PF3D7_0704900	peptide chain release factor	MNLKYNLFLT LSIFFLELLI MSIFVECRKN IRGLNKCLFL YKGVRNIRNR YNLCSYVNKD VENYSRYFKN SCSLILSSGT GGTEACDFCN MLYNMYIKYL CRIKNRKNIK YEVIDISKNE VGIKKVEIKI DGEYSFYNFV SEKGIHRLVR NSPFNAQNKK MTSFVKVDVI PTLNFNDLNV INFLNTAEGV GSSSSSKLTK ESSDKKQNKN KHKQLKESDN NNNNMNNSYN GGNNKMNDFV INKSDLVIQT MRSGGKGGQN VNKVETAVRI LHKPTNISVK ASSERTQLLN KRNALKRIYE KLLYLQTEAL KNKKYELANK SLTHFGEQIR NYVLYGNKMI KDTRTNVFST DIDKVLYQGE IDI…
	PF14_0265 / PF3D7_1428600	peptide chain release factor 1, putative	MKKLLFFFYC YIWFDLFVHV SNFYIKPKNY YTHKAERTKK SVLKRYSFQL YNKKQTDLYN DNKNFIRIEF RPGVGGEEAF TWSKELLNTY KLFAERNKCK VEKIQDISDS LVISSKENLR IIKEDKQIEI NLYDLFKNES GIHQVKRIPK NDSKNRIHSS TATVAIFFHK KEEPKYEINL KDLKISTFRS SKPGGQNVNK IESGVCILHK PTGIQTECQE ERTQELNKKL AMKRLIQKIQ HMESKEKENM VQHERAKLIK ESNRSNRIRT YNFFRGYITD HINKKKIDLI YFEKGKLEYI LNIF
	PFB0390w / PF3D7_0208600	apicoplast ribosomal releasing factor precursor, putative	MIFQHFLSLH NEKKISMFFY TFLILYISHV RIFYDCLNLK NEKNYNVLLK NGNNNSPSYY FLNSNYRNNN NFLRRKENYQ RVLLLYNPKF NDGAKRNSYI LYAHSKKNKN KNKINHNINI TKRETVSRRD RDDEDDNYDD DDENYDDDDD NYDDDENYED DENYDDDDEN YDDGENYEDD ENYNDDENYD DDENYDDEYD DDDYPFNNDD IDIGDKDTPY ETQKSKIRSK DENVAHQNKG GNTLSLENYK IKKNANSDLE TDKKNKVKKK QDEEMDETNK NNKNETNEKD EKDEKEEKDD NINDNNDDIM EDEYEEDYIT EEHIKDLHKI CSEKMNKVYE FLKKESYRFN LNNVSNDMFE NEK…
	PFI0380c / PF3D7_0907900	peptide deformylase	MLMYYSLFLF NLIICCNVTS IYGYIHNVRS LEPYIKNDQI KNYSSNIKQK RKGSLYLLKN EKDEIKIVKY PDPILRRRSE EVTNFDDNLK RVVRKMFDIM YESKGIGLSA PQVNISKRII VWNALYEKRK EENERIFINP SIVEQSLVKL KLIEGCLSFP GIEGKVERPS IVSISYYDIN GYKHLKILKG IHSRIFQHEF DHLNGTLFID KMTQVDKKKV RPKLNELIRD YKATHSEEPA L
	PF13_0354 / PF3D7_1367700	alanine-tRNA ligase, putative	MIVYSFSFLI FLYFCLYLNI KESIILGNCK IILSRPFKEE KKKKDIYFFF NSGKNLLKRK KSTFDLLPLH SNKRRRINLF INNDKKKKIK SNSNNNNSNN NSNNNNSNNN NSNNNNNNSS SIKRECGEPF FSFYSYENIL TVHNNKILKD QNNNYVLLHL CKKIKKKYKK EKNKKREYCN HYKFMYLNSI KRKDIFIKLN KINNKSHFYK DIHKSNKCIK TFIYSSSHNF HNSNYSSLNA FSFKSLFTKN TYNRSFLNFL KYTTKNNLKE KKNIKDFFSF SIKLGKDKNI NLDNLKKGYY KDINTNNRSN HNKHNNNKYN YNNNNCSSNH FCSNHFCSNH FCSNHFCINM DMNDKLNNRN NWS…
	PFL0900c / PF3D7_1218600	arginyl-tRNA synthetase, putative	MITMECITKK IKTIFQNSIQ KCFPSISEDA IVTYANLKFG HYQCNNAINI YKKYGKELNY ENAQKISEFI ISNINETIFE EIKSSPQGFI TVKLSKDYIE TSLKKLFNGE KIDISININD IKESNENYGN VLVDFSSPNI AKEMHVGHLR STIIGDSICR VFEFLKINTH RVNHVGDWGT QFGMIINYIK THYPNFKEEM PDLSNLTSLY QESKKMYDAD KEFEKSSKEN AIKLQNNDED CKFVWNKLCE SSKKEFDKLY NILDIKLEYV GESFYVPMLS TVLDLLKESK LLTNIGDAIC YQSENFKVPL FLQKSNGGYG YDSTDVAALY YRLTQLNCNC VIYVTDIGQL THFETIFDLI KKT…
	PFI0680c / PF3D7_0913900	arginyl-tRNA synthetase, putative	MLNFLILILL FYILFFDECE VLRNISYNHK TQNKKKGFLF LTPLLLNKKR FEGRTYVKKN NINSNYTYRY YDFIKNGKGS IRPFIYKSNK RRVHKLYVYN KSEKKDDTYH DIINNHINII SERIVGDEHN FILPNYCLIE RNKFYQDYDY QTSILIYLEN YLRSKHVTFH DIMKTKNMCD DKCVDIRNYV ISYLQNECSD IIDNLHISEN GILNIRINTN SLMEKIRNFY NMNILKSNNE KEINKKKKDI VLLDFCSVNM CKHIHMGHLK SIFLGYSLSN LFHFCNYQIK NRSHIGDWNL NIALVITFII IFSNIHINKE ERGQQVLSNI NSLSNKENEY NYKETNNNKF FVNTYNYNDN IKK…
	PFE0475w / PF3D7_0509600	asparaginyl-tRNA ligase, putative	MRIYFITLIY FFTLLFLLTK CIKNKNRNKI SNISCTYNLS RIRNRPVLTT GTKRRKLRNN FFFLNNYRKM ISLCNKIDIK KRFLLPKLQG KYNLYCTTKN VERTRIKDLF KMDIKEAQHK NFKICGWIKS VRTVGKSYFV FVDINDGSYY KNLQVIIDDK IPDYEYILKT STDDAIECFG ELKGSIGKKQ NVELCVYDIS KNHYIKLFKQ MNQDTVEEKE KINDSGNEKD NHNFNSNGHV NNYNDSNNNN NNNNNNYNNN NHVNNYHDSN NINDNIIFTK NSSGHINEDN KTKGAKHNKE DYYVISKKYH TKQYLRNYPH LRARTKLYSS LFRLKSDIIF ETFNFLKKKK NYTYINTPIL TSN…
	PFE0715w / PF3D7_0514300	aspartyl-tRNA synthetase, putative	MIYVVKYIFL ICYINTLFLR RVLFCYSYNL SQHFSLYNNS KFVLFKRNKK RNKINKYHNI YYHKGGFHYE NNIGNNNISN PFFLNKFIYN KKKHKLNFFN SPTSSYDDAC ILKNLFNSFT TERRIKNKKS DKNVKMNVMI KKKCMLYLTF NRKENDNIIN NNNNDNNKNN NNNNNNDNNN YHVDESYLSN IGEPCILLRS TSWGHLSLFY GSHLNRDYYT YEDIIKYIET NEKKFVKCIN NNIYNNNDNN NTDITKQTFI DKKYILIRGR MERKKKQSKR IFLYLRLSNG MYLTCVYEKK IPTNKNNQSI YSIDNMYTYI KNLKNESVID VVGRIKLHGT LYKHNISYIE SLLNQTVIEL VAE…
	PF10_0149 / PF3D7_1015200	cysteinyl-tRNA ligase, putative	MNLFLFICIALFIYLDKFHLPNSLKYNFKRSLLLKLGHQQTVLSKNSEATKSGGMFFIRN SFLYRNKNFLKIDKYIFKRLFHSKMDNANKLPKWNQPSKEGKKITNLFVNNSLTHSKVEF IPQEGNKIKWYACGPTVYDAAHLGHARTYVSFDIIRRILVNYFKYDVFMVINITDIDDKI IKRSVEEKIGFTELARKWEYEFWEDMKSLNVLLPTAITRVSEYVGDIVKYIEKIIENKYA YVSEEGSVYFDIDEFKKSEKHFYARMEPLSVKDENKILEGEGDLGVISKKKKNAYDFALW KSSKPNEPHWDSPWGKGRPGWHIECSTMASNILGDVLDIHSGGIDLRFPHHDNELAQSEA FFDHSQWVNYFLHSGHLHIEGLKMSKSLKNFIT…
	MAL13P1.281 / PF3D7_1357200	glutamate--tRNA ligase, putative	MIFIYFFFVT LIIINLNTIE SKYLFGYSYN GNPKCPINIL YDKKYIYSFI LNNNKRNTYN SRIKCAKKSS IIPNEIVEGK VRLRFAPSPT GFLHVGGCRT FLYNYILSKQ MNGSLILRLE DTDIKRNTKD SLDEIIKDLN WLNLTWDEGP DKVGEYGPYK QSEKIQLYKK IAHQFVNEGK AYFCFCSKEE LQEIKEKSKM MKKKYIYNRK CRDMNNEQIK MKLEQNIAYT IRFKSPLKRK IILKDILKGD IIDEVLEDFI ILRSNELPTY NFSVSVDDYL MKITHVIRGV EHISNTFKQI LILETLNADI PHYAHIPVIT TEEKKKISKR NNEYLIRNLR EEGFKPECVV NYMTTLGWGS ISK…
	PFD0780w / PF3D7_0416100	glutamyl-tRNA(Gln) amidotransferase subunit A, putative	MYLFFFIKIF YIIIIFYNIE KVNNYKSSCI LLIKNNKLIR IPSFGHPKNY SANINNNVHK LLCTENKKQG KNRKTKKKNI YIYKINKKCG DLKCELINKT CLTFVPTSKK IINNMLFNKH NNDNNKNKTG HLKDYKIYNV MEKKHFYNQH DSYDELNSSE IYLIRKQILN SHKNKLKHIF EKHITNKICN HNINKYNSFT YIYSMNKIHK QLDRLYNIYE KWNVINKQNK STQGNRIKKL PKLFGIPIVI KDNIITKGIP TKAGSQILLK YIPTYDSTVV KKLKKCGAVI IGKTHMDEFA MGSCTNKSKN PFNETILSCG GSSGGSASCV GSRIFNCSIN TDTGGSIRTP AALCGCIGFK PSY…
	PF14_0198 / PF3D7_1420400	glycyl-tRNA ligase, putative	MIIIVIFLLS MFFFENKTYC FISKINIKNL RHNKNNNNKY HLFASRELRK ISSFVLDNRI LFNKQKIRKR KFNFFNVYSN KMSDMDNIKE QKENDGCGSL EELIERYVCE ISSLIERNEC IKGIDDEDLK KEFMENEKLL QDKKMKLKDL YGKPSEELKL VENRTKLENL VKRKFFYTNS FEIYGGASGL FDYGPSGCLL KSELENLWRC HFIYYDEMLE ISGSCVTPYQ VLKTSGHVDR FTDLMIRDVV TNDCYRADKY LGDFLKAKIE ELRKKNTKGD EHVDEKEKKQ KRDDDINENK ENNKNNENNK NDENNENNKN DENNKNNDNN NNNNNSCNYN CDMVGGLHNG NERLIQKIEL ILR…
	PFL1210w / PF3D7_1225100	isoleucyl-tRNA synthetase, putative	MFKYGNFIVI IFLIFLSLII ELYLSLHIQK KHIPLDNKNN SFLQFINSEH YKYKHNNKYQ LNQHKKNIKD VIKESINLPL QFLPTTYNSL DRQKFIQQFW NCKEIYEKRN FENIKKHIYN NGNNTKQSKY IQHNNTQSCN EHNILNKKKK KEKETYSDVM ETKNSHLIKE LIEKKKKLIS KIDDNNNNNN RKHIFKYIKT KDYINCHNGN HLINKFENII YEKIKNEKYL KKNKKEILLK LYNKILNKIK IIHDGPPYAN NDIHIGHILN KVIKDIYLKY FLFQNYFVLL IHGFDTHGLP IEYNVMKLLK INHIQDLNLN SSYIHNQNES LKNEHVFFKS YINLLNKLKN QHKKKKQISF LSN…
	PFI1645c / PF3D7_0934000	histidyl-tRNA synthetase, putative	MPLLFFILLI IYFHLIVCIK VDIERKHKFL FLNTKLLKKD NIKRCCRKIN KKRIFTVQYV KGIRNFINPT NYEKREYLFN IWKKIAENFS FSFYDLPILE SYDLFRKSPI NESYDFIKNN KHLILRPEIT PQLIRYLYIN DNLLQDYREQ EKKIKTKQKN NNNNDGYGDY HHYHGGDYDD YDDCSIKQWD SINKVKTKYT HIYHTNKYNE NFSVHHKQNK SDMYSFNFKN SFHNNYEHTS DFINNMYKKK KKKIFKYENF NKIFKMCTIG QCFRYEQTSR LRKREHYQWN LDILGIENIY AEVELLSMLI TFFNKVHMDE KHIVIKLNHK YIIEYILYSI FQKDMDNLFS YNKMKQEIQN ILH…
	PF08_0011 / PF3D7_0828200	leucine-tRNA ligase	MFFKFVRFLI YIFLYSLCYQ HVNNVFALHI NKYKNVFLFE SPSVLIKNRR NYKRKIYSHD EEKGKYDFHR IEEKWQTIWN SKRLLDKDFE QYNKINLGRK EKKEKRHKDK QNGFIDKPYN DVYEKGDNTY KYNKKKFYIL DMFPYPSSEG LHVGHILCFT ITDIISKFKK MNNYCVFHPI GWDSFGLPCD RLSMKKKIDP REIIHKNISN FKNQLIKLGF LFNWESEINT CDENYYKWTQ WIIIQLFLNN LSYKKRSYVN WSNELRCVIS NDELRNEINL QYLNIQKIKL LQWYLKITKY ANRLIKDLNM IHWPMKIKNM QINWIGKKTG IFLKARIISL DKFLNNTHFN FVNIKKSYNN NMI…
	PF14_0166 / PF3D7_1416800	lysine-tRNA ligase, putative	MKKKKRPYII LLFLLFPLNI FLSFSFIRYN SISFKNNQSN KNNFFFVPNE CIGTICNNRK KKKHFSLYNH GKEFHERVKK LHILSDALNI DAYPSSFIKR NIKIDDLKKK FEHLKDGERD DKIYVIYGRV TVKRNNGMFM NIQDDEGNIQ IYLDENLPIK GKKNDNKKIN NNKIEEVPNK YHMENNTVSS ILSNNNKTNN NDYVINDQSY NEKYETYNNQ IMARKIIELG DFVAVKGFVR KTLRGEITLH VKDIYMLSKS LLPLPDKYKG MKDVEYKYRK RYLDFLTNND QKDKIKARYD IIQEIRKYLL KRNFLEVDTP ILQLIPGGAT AKPFETYLKS LNLILYLRIS PELFLKKLIV SGI…
	MAL13P1.67 / PF3D7_1313200	methionyl-tRNA formyltransferase, putative	MYVKCFFYVI QILFIIFLKC HCYKIKCFNI LDLNKKKYYS FREHINCEHI RNSVNRNNLS NVLLRRRTKN ALVKELYVSK LKDNYKTHTN FIRTNNIFLE EDKKIQECNI NNIINNNVDI QENVEKYNIL YKNQLDDINI LYILLFNTLM IYKKKYDFFM NENYIRSYYY IYKNNLGRDK KIYNTKNYFI NTFSITWYNT IKPYMNNIFL EILNIIENTL GNKIFYIDIK QELNKNRDEI INTLYNIYKG NFRKRDKKPI KLLFIGSNEY SNLCFKIILL IIKRLRNDII LDNVITKSPR RKGRNLILKK SNVEDEAIKN NINVFYYDKL KNNIHMLQNK KMDLCISISF GEIFNCNFFK TIK…
	PFL1540c / PF3D7_1232000	phenylalanyl-tRNA synthetase alpha chain, putative	MFFSFFVCFI FVIIEFIESY KKNPQISDIY FRKLNKNYHI KDDIINYNRF KYVYKIKNHP LNEIKEEVLN FLKKKTSFYL VYNKCPLYYK NLCFKEILIR DTNETTSIKN NFYFSHDYLY IPQATSLFPY IYDLLKNNNK QNIQKCNDTI YVRNNPYSEN TPNNNIDVNN NIEKKQDNYI NKEIVENNNV HIINNSNILN KQRDNFCIIS NIFRKDNIDK LHFPFFNQMD IYFKITNELV HKKKQLVYFL CELLSNIFGP NYKWRIRKDS FDFTTHSLQA EVFHNNKWIE ILGSGILKSK IIFNKKKKYE INDYLAVGIG LDRIAMIKWD IDRIRDLYLY IYNTEKNIYS VEQHNEKDKC SQH…
	PFI1240c / PF3D7_0925300	prolyl-t-RNA synthase, putative	MLIKIIILIG LFHHVILSLK LVNLKKKRSN VFFVNNKILK RNVPKKKYRI LSNKNQSYIG SNYIFNRIFN DNIKSNGDKT SELLQRANYI RDVNGIYNIL PLGFRVINKI IDFLNKHLEK LNSHAMSLSI LQAKKLWNIS DRSKLYSDEF LYVYKQKQSK NDKSSEESLK KKIEDDGYIL SPTCEESSLS LINQIYNENI TIKCLPLLIH QYNYKFRNEK RFEKSLFKSK EFLMKDGYSF HSNEKCLNET YEKYKECYKN IFEELKLSFN IIKKRKKDKM NALESHEFQV LSRDGKYKEA AHIFKLGDYY SNKLDIKYLD KKNEKKNILM GSYGIGIYRL LYFLIENFYD EEGIKLPQQV APF…
	PF07_0073 / PF3D7_0717700	seryl-tRNA synthetase, putative	MVLDINLFRK EKGGNPDKIK ESERKRYHDE NNVDKVIEYD DKWRKCIFEL EELKKNINMI NKEIGNKKKV DKNADVEDLK KKSLNIKEEI PKYQLKEKEL LKERNKYISK IGNLLNIKVV CSDNEDNNKI VKTWGECKIL PACEENDNSI HDNVVNSNNI KRETLNNEVD NKKKIKYYYH YDLLRKIGGA NFKKGIQVAG HRGYYLTGAG FLLHNAILQY ALNFLVNKKY IPVYPPFFMK KNIMEECAEL DDFEETLYKI PSTSNSTLSS QQVSTSPTKI SSQADIKDDT TCNSQKKTNI PSNEDLTRDD LFLIATSEQP LCALHKDETI ESKRLPLKYA GFSSCFRKEA GAHGKDIRGI LRV…
	PFL0770w / PF3D7_1216000	seryl-tRNA synthetase, putative	MHLSKIIFLL IILFPYHVNS RKPIKYKNVN NVFIEIYPCK AIKWERKKKK RDLIKNNKLI HNVDVNYINM ITNDNHISSE KCRDIKKKRK ITSSEYGMSL EFFKKNPKKV VQNLKKRGME KYLNVIVMLK KLINEKNENE VLRNKLRNRR KLLSDHIKNL IFNSKKYEDI INRDITNDSD HKTNLIHVDE EKKKTEKKND TQDILKDNQK IRYINKENQA TNNNINNQDN SNDVLKKNKI QIEEIKKETN QINKDIDHIE MNIINLKKKI EFNLYKLPNI LLNKVPKGKT TEDNKIIKFY KKENIIQLNN EEYDFIEPHE EIIKKYENNF IFSNISNKIG FGYNILVNDI AKLERALIDF MIN…
	PF11_0270 / PF3D7_1126000	threonine-tRNA ligase, putative	MKKIIMVIFF LLSKICKNNA ILKSLKKNNK IVLKNIITKK QEPHLYHKLY NNIYNNIYNN NNKKKNRNRN KNKNKIKIKK KENKEASFFY INNYKKKLFD EQGNTLILHR RNNWINKRDN IVENYKNVKA KKHLLKLFIS KNNYIYNTKM FSSCINNNCN TNDVEVMKKK LVVGENPEFI KKRLEKFNEI KEKRKQELEE NFEELRKPIT IELLDGSIKS GESYVTTPFD IALSISKRLA EDSIVCKVTY LEKVDVELCD IEEGDDHNEE ANDEVEEKSK EDNNENNNDN KNNNDNENNN DNKNNNDNKN NNYNNYNNYN NYNNNSHIMK SILWDLNVPL LGNCRVEFIN IQSEEGQKIF WHS…
	PFL0380c / PF3D7_1207600	tRNA delta(2)-isopentenylpyrophosphate transferase, putative	MPFNKYVLLI YFILLVNINL FKKKKFNTST RVGNCFMIYD KNIKLNKIED IKKNNILQKE KRVFNNIILL RTNIDKKKKN LLKLLYNSSK LKTTGCQRKY KNRKCYSYLI NNRRINTVEC LRKVLNKSNY KIVSKLFKKN NVKTYMSNSN IDDSDIINLL KLNGKEKNMD NSKIGKCINT KNEEGDDELM SHKMNDMINY LNEDPMKIMN PLDITQLNFF RDGNSQKKEK IIIIIGVTCS GKTKFSIDLS EQLMKYKIKS EIISADSMQV YQNFNVGIAK VEEEEMKDVK HHLLDVCHPN DTFNAHKYIN YTIPLIKNMN RNNKIPIIAG GTLLYIESLL WESVIDIRKE EEKKEQTYNG QII…
	PF10_0053 / PF3D7_1005000	methionine-tRNA ligase, putative	MKIYFIFILF LYLNFFILII EILSKDIIKT RRSFPSYIKD GEKRKSNKIK RKRIKNDAYI NVYRKNILDS INIKGDQNKI KEKWLQNLKK KKAFDKISVR LSNYNDDKKE IFDITFVNNK EDRNDDNYDN KSCIKKVCNA EEYLLISTPV YYSNDRPHIG HAYCNILCDV LYKYEKLKGV EKKKKGIIFF SGMDEHGLKI EKKCNKNKMK IIEYIDDISN YYKDMNKKLS VDVNLFYRTS YSFHKMFVQN VWKYLVHNNY IYKDTYKGYY NINEERYISE QELREGKYKI DNENIIYVEE ENSYFFNILK FKDYLIDFYE KNENFIYPPY LRKQVIYTLK NELRNICISR YNTKWAIQIP NEA…
	PFE0815w / PF3D7_0516300	tRNA pseudouridine synthase, putative	MNKFFPLLVC VSLIFFFLKL SINAKKIFKK NIKNKPFILK KSNNINGIYF IKSKLNKIEN KKNKNKKMKL FCDHNDNVNR MEQQNNSVNV SKDNSSFIFS NRKKLTNLLL IVNYDGTNYN GWTGLENSSE VYLNALQNYK NKKKTERQKN IERKKYSTVQ NNILDCILKL HGYKYIHNNN NNEHICNSYK VGDTDNYNNA HHNDYNQNNV NGIINNKPFE FIGVSRTDKG VHAKEYICQY ISYEKEPPCD GDMEHIKRSL NSLLNKDIKI LAVLKSPHDH FNIRFHNSGK IYTYNLDIRN PSQPLERNYA WQLYDDPRFF FLSKKTNKHK KEGTPNSIHN AQQTCTTPGD KNGRKALYIA NKK…
	PF10_0175 / PF3D7_1018000	tRNA pseudouridine synthase, putative	MVIILLLAII CSYNITSYPC LNYKRRKNFY YCEIFKNEKE ENSLKYPIYK YKRIKRNRSN INAFKKYNLI NTLINRNYNV NNNMKKDGFH TRRCVAQLSL FSRKKRKKTN NEKKYIFNHI HFYSYILVYF NEGLLQHWTT TPHVTKIIFD NMYKGFRMKG GDNINIMGFY NTHNRKIHNY SLDIHRSDEK DTTDIIKKIK NKTGEKLIKD NNKKKNNNNI NSNNNNINSN NNNNNNNNNN NNINDISIKK DRVCCNNPHI NNKGDMDEEN NEDHVNKTKE EHSFESVLNK YNKELILSKS KIVHLDFPIC KNNSSNIVTM DDIFYGGFLN IYKPVKLYSM RVCEKIKKIL KDYFYKLNKK KVN…
	PF13_0205 / PF3D7_1336900	tryptophan--tRNA ligase, putative	MDKLKTIYLD SALSIIKGAL CIILQIPTSR TTESVKKKAN NVGVITVKSI LSEPTIHQYD DIKKLIKNKL QECVPFYNYN MNRSFAEKIY GDCIYDNYGL SKEINEINLI ILEEWNINCN KNRVLKNTGL IKEITINQFK YSTNKESLEV HFAVSPKYTF EELSTMYKNE KGLYEFLLSP IIKIICNEND KKLLDNMNEE CTYLNAEDIL PKNKVLPPSG IENIDYERSK DVTPWDVNIN NEEGINYNKL IKEFGCSKIT ENHIKRIEKL TNSKAHHFIR RGIFFSHRDL DFLLNYYEQH KCFYIYTGRG PSSLSMHLGH LIPFYFCKYL QEAFNVPLVI QLSDDEKYLF NQNYSLEYIN TLT…
	PFL2485c / PF3D7_1251700	tryptophanyl-tRNA synthetase, putative	MIKGNIYLLT YFLIINFILC TNIQSISRKT KNVPLLPFFF TLPYTKRIKR SDLQSKRDCT FFTGIKPSGN IHLGNYIGCL HPIINVEATK KCSNNLSNKN ESVIKLNKII LIADLHCLTK LSNIYSLKDK VIDSVKIIIS LIIDMYKKKQ SYVDVYINNV KLEDILQLIE NKEPNKSNHN NENNNNNNLY EQIASHTSQF HNHIKTDNLG GDMNCVEFPS QECHNHKNKP IKQKHYFYIF KQSDIKLHTS LYYLINSFTS INMLNSHIHI KMGGHNKSVA LFSYPSLMLA DILLYKPTYL IIGQDQIKNM EIMKKLCRKI NYHFSNVAKL PKIFFSKFYS EVMNLDGHKK MSKNHLLHHD KDT…
	PF11_0181 / PF3D7_1117500	tyrosine-tRNA ligase, putative	MIILKVLFIY NGLIQIIRCY KKFAPHRLNN IIHENNKNNI GTYDIKSKAL KKLYERKLIH YVSDIRNIDK ILYHNENEKE KKNRKSVYAG IDLTCKYLHL GNLVPLITLD ILRNHNTDVI ILLGNSTTQI GDPSFQKVER QKTLEKDILE NEENIRRTII ELFLQREICE EDMNELIKKS NIERDKEFIY ESDNKGSLII LKNSLWYDKM NIIDFLKYGE YFSINKLLRK ECFLNKIKKN LTLKDLNYIT LQSFDFLHLF NKFKTCIQIG GSDQWGNIQS GIELAQYISN TQLYGLTTNL LVYKNNIKYS KSQFNENKRL PIWIDKNYNS PYLFWNFLRN VEDQKVQSYI DMLTNLKINI NQE…
	PFC0470w / PF3D7_0311200	valine-tRNA ligase, putative	MTILLTLFII YVCLIGHLTK VYIKENISNQ KKNPLNFIRR KHNNTKKNRK LSFNINKNIN HCKRIVKVEP FFIHKNVRRY VYRRSCFIFN IWNSSKVIKD IYKYIDSCTS FLRKFKSLPS IINVENKKYG KLEKRKKEKN DLCPNIFITY SSNNVPRNIS NKLEHFIYKQ KDIPKEQNIL TYDFFKRDEE LLNDQNRNDF IKKYYNPSYH CDEHPFEHIY NIKDMEHIYD KSIINYIYDL KRKEEIEYIR KFNRSHYLNS YLLIYPPPNL SGNLHAGHFF NFIHQHIFFL YNKYIMGKYA IPFFGFDHGG LSAHEMFAKH MRGEELGREK YINEIKKWQE NLKENMLKDL QNMNITYNEK MLF…
	MAL8P1.27 / PF3D7_0825200	translation initiation factor IF-3, putative	MLLKGFFFFI ICVFYILIFY NNNVNCFYIP KICCTKYFYL KETSDAPAYS DGHERYIQEK KLKQLKHKME NKSVKQLRIT PRIGMNDLLI KINSAKQFLL KRHRVKFILT LKGREYTNVE NVKRIFSKIS EELKSYGNSE TMRQNGNIVS QLFNLKAKRK NEGG
	PFD0355c / PF3D7_0407200	peptidyl-tRNA hydrolase PTH2, putative	MSSDNKVINN LQYEKYDNIA LFVAFLCGLI LGLVINYYKS MKKKVIKIKE VCETFDLKYK TDCKMVFCVR TDIKMTKGKI CSQCCHACLS VYEKILKRNN KIKDELQQKN SLTYFDVWKK TGQKKIVLKI SSLEEMFEIE SKAQKENLIT SIIVDAGRTQ IEPNTETVIA IEPVPDEIVN KITGDLKLL
	PF10_0200 / PF3D7_1020700	ribosomal processing ATPase, putative	MKKKVDNRIK ILIENNIAVG QRSMFFVVGD EGKNVVVNFY FLLNRLINRT HNILWCYKKK LDFSTSKKKR YREMKKKIKK GTFDQTIDNN FDMFLKNADI RFCFYKESKK VLGKTYSICI LQDFSYITPN ILCRCLETVI GGGLIIFLIN KQNELKDLYN LTLNYHKKYT MNGICNVYNN YIHRFFLSLN KCENAMFIDD EMNILPLNEN YLKIKKITSK GSDGNGIGNN VTKLKHMEVQ KEGEQSGSNI NNNDDDDNDD NDNYSNSNNY SNSNSNNYSH TKSATLGGFL CPDKNLLQEK LKFLESICEE NEKKKEEEKI FLYSSKFSRN DTCTKINKNG DIHSSDNKYT RDTYETYDSV TNT…
	PFD0675w / PF3D7_0413800	apicoplast ribosomal protein L10 precursor, putative	MFIKKINIKY LSFSLLVYFI YNAYVYNTIK LQKCFNYEHK KGNFLVSSLV LDGKDIKGRR NKGIINFIRS NIITTNKFKL IKKKNVHKHK NFLLKSRKCD GYRNTKEGKE ETIRKIKRIL KVTKLLIQLN SFKLSPNLRM DLLINMPRPH VRMHMVKNTL MKLSVKNTPF EAITPYLKES NVYLFIMNEN YISFTLYRNK MFSSLYKDYK LNNFIKVSVY ENTILDKKET EDLINLKSHK VYFGHVVNKI NNIITSIPNS ILQIPSSIAR GIYLNTQKNQ
	PFI0680c / PF3D7_0913900	arginyl-tRNA synthetase, putative	MLNFLILILL FYILFFDECE VLRNISYNHK TQNKKKGFLF LTPLLLNKKR FEGRTYVKKN NINSNYTYRY YDFIKNGKGS IRPFIYKSNK RRVHKLYVYN KSEKKDDTYH DIINNHINII SERIVGDEHN FILPNYCLIE RNKFYQDYDY QTSILIYLEN YLRSKHVTFH DIMKTKNMCD DKCVDIRNYV ISYLQNECSD IIDNLHISEN GILNIRINTN SLMEKIRNFY NMNILKSNNE KEINKKKKDI VLLDFCSVNM CKHIHMGHLK SIFLGYSLSN LFHFCNYQIK NRSHIGDWNL NIALVITFII IFSNIHINKE ERGQQVLSNI NSLSNKENEY NYKETNNNKF FVNTYNYNDN IKK…
	PFI1645c / PF3D7_0934000	histidyl-tRNA synthetase, putative	MPLLFFILLI IYFHLIVCIK VDIERKHKFL FLNTKLLKKD NIKRCCRKIN KKRIFTVQYV KGIRNFINPT NYEKREYLFN IWKKIAENFS FSFYDLPILE SYDLFRKSPI NESYDFIKNN KHLILRPEIT PQLIRYLYIN DNLLQDYREQ EKKIKTKQKN NNNNDGYGDY HHYHGGDYDD YDDCSIKQWD SINKVKTKYT HIYHTNKYNE NFSVHHKQNK SDMYSFNFKN SFHNNYEHTS DFINNMYKKK KKKIFKYENF NKIFKMCTIG QCFRYEQTSR LRKREHYQWN LDILGIENIY AEVELLSMLI TFFNKVHMDE KHIVIKLNHK YIIEYILYSI FQKDMDNLFS YNKMKQEIQN ILH…
	PF10_0191 / PF3D7_1019800	tRNA methyltransferase, putative	MLIFFFFFFF FKYIYNIFIL TCFYITLSSY YFIISFIFST LMFFYFCTFY VISLFFLYIS SFCKSIKVTQ LYDKKIKIKS FINNYLVSCR KKKYIYNNVD DKSNIGTFNL YHNIRDNNNN NNNNDNNNNL KKRDDVLFPL CNKNIINDVQ KIYDEVNNIK DKEQKINYLM EQCSSLCKEN YFPPILNLNK AYRNKRIDEF NKGNKNFYIN EVGKNIWYKY VNRCDEILFM AIDIQIDEDE QRNNSIKDVH DVHDDNIKTC TLIKDDKHFE KYKDIHNDNI LKNILPLDKK IDSIKNMLNH KYMKKKKCII TIDAYSNNLI LYCFLYLILK HINKMYLYSF MNIQIKEITA KLKELFDLHF NVH…
	PF11_0072 / PF3D7_1106100	apicoplast ribosomal protein S15 precursor, putative	MKNIKSCVTC LLFFYIQIWI NCLFCFGYNI NKNLGVYPFS LIRKKNVPQE KFKRQLIKVQ NEGKENIFTQ DGNTNTIKED KTKQTKTNID IKNKIEKEKI EINEILKKSE NILLERSFSF HKEDITIKPE LLKELITQKY RKIFQRHDKD CGSSEIQIII LTFKIFFLTE HMKKNKKDFA CLRGLFKCVS KRRRLLVYLG RKDREMFEKI TSYFNIKKPL LPRTPEYYNK DLKYIHFNNT KRFKNNAEKK KKDKLKKKKV QTDKILFGN
	PFL1210w / PF3D7_1225100	isoleucyl-tRNA synthetase, putative	MFKYGNFIVI IFLIFLSLII ELYLSLHIQK KHIPLDNKNN SFLQFINSEH YKYKHNNKYQ LNQHKKNIKD VIKESINLPL QFLPTTYNSL DRQKFIQQFW NCKEIYEKRN FENIKKHIYN NGNNTKQSKY IQHNNTQSCN EHNILNKKKK KEKETYSDVM ETKNSHLIKE LIEKKKKLIS KIDDNNNNNN RKHIFKYIKT KDYINCHNGN HLINKFENII YEKIKNEKYL KKNKKEILLK LYNKILNKIK IIHDGPPYAN NDIHIGHILN KVIKDIYLKY FLFQNYFVLL IHGFDTHGLP IEYNVMKLLK INHIQDLNLN SSYIHNQNES LKNEHVFFKS YINLLNKLKN QHKKKKQISF LSN…
	PF14_0642 / PF3D7_1467400	organelle ribosomal protein L22/L17 precursor, putative	MIRKIKLIII MLIFQVLLDE IILVYNLSFS DKKKYDLAFI KGDSNKIMIR NNSLRNNTII KKTCEKDKFV LNNICQTKEE NKLVDTISSN DNVTMDSNNL LYDDMDLFEN DGLQLKQWYF PEKVKEKWKE KHIENVRDNY KKVLLNNKYN ELFNMYRNIK KNNIENYKKR VKTNRINPVI YVKKRLVSAT AKYIKMSFMK TRKILWKIRY MPIIKAFAFL YYYGTNKYTV NIYKCIKSCL HNAINKYGRN NIKPVFHTLQ ANMGGYTKKI NIRARGKTDI IREPHTHIRV VLEV
	PF11_0212 / PF3D7_1120500	tRNA nucleotidyltransferase, putative	MNIFGLLLLN LLINVIFILC NIKRKNKFLK RQLCSNELKH LKYKNDNMIR KGILNYKYKY KYRFFYIIIK KNYSNKIKRK NKIKQIGVME NINNINDNNK WRCLSSSNHI SSNMMGNTFY ENVYINYLKD YIIDEKEKAM EKNIVKDEEQ KKDKIYFPNS NNMLNAKDIE NVIHERIRKE EENLFEFLKS VNERYNLNCT LRVVGGWVRD KFLNINNDDI DITVDNMKGA EFCNYIKEYI KEKENKNFNF GIIKINSDQS KHLETSSFNL FNFQVDIVNL RNEKYTEESR IPEIVIGTPE EDALRRDFTV NSLFYNLKNK KVEDYTEKGI FHLKNHIIST PLEPLATFLD DPLRIVRCIR FCG…
ISOPRENOID BIOSYNTHESIS
	PF14_0641 / PF3D7_1467300	1-deoxy-D-xylulose 5-phosphate reductoisomerase	MKKYIYIYFF FITITINDLV INNTSKCVSI ERRKNNAYIN YGIGYNGPDN KITKSRRCKR IKLCKKDLID IGAIKKPINV AIFGSTGSIG TNALNIIREC NKIENVFNVK ALYVNKSVNE LYEQAREFLP EYLCIHDKSV YEELKELVKN IKDYKPIILC GDEGMKEICS SNSIDKIVIG IDSFQGLYST MYAIMNNKIV ALANKESIVS AGFFLKKLLN IHKNAKIIPV DSEHSAIFQC LDNNKVLKTK CLQDNFSKIN NINKIFLCSS GGPFQNLTMD ELKNVTSENA LKHPKWKMGK KITIDSATMM NKGLEVIETH FLFDVDYNDI EVIVHKECII HSCVEFIDKS VISQMYYPDM QIP…
	MAL13P1.186 / PF3D7_1337200	1-deoxy-D-xylulose 5-phosphate synthase	MIFNYVFFKNFVPVVLYILLIIYINLNGMNNKNQIKTEKIYIKKLNRLSRKNSLCSSKNK IACLFDIGNDDNRNTTYGYNVNVKNDDINSLLKNNYSNKLYMDKRKNINNVISTNKISGS ISNICSRNQKENEQKRNKQRCLTQCHTYNMSHEQDKLANDNNRNNKKNFNLLFINYFNLK RMKNSLLNKDNFFYCKEKKLSFLHKAYKKKNCTFQNYSLKRKSNRDSHKLFSGEFDDYTN NNALYESEKKEYITLNNNNKNNNNKNNDNKNNDNNDYNNNNSCNNLGERSNHYDNYGGDN NNPCNNNNDKYDIGKYFKQINTFINIDEYKTIYGDEIYKEIYELYVERNIPEYYERKYFS EDIKKSVLFDIDKYNDVEFEKAIKEEFINNGVY…
	PFB0420w / PF3D7_0209300	2C-methyl-D-erythritol 2,4-cyclodiphosphate synthase	MFLKGYTSNV VLIILTFFIL LTKEEKNIKN NISGYCFLNF GLKKNAIIKK REKQNLKLFC YNGIRIGQGY DIHKIKVLDE EYNTYANNDF NKNEQSFKTL TLGGVKINNV LVLSHSDGDI IYHSIVDSIL GALGSLDIGT LFPDKDEKNK NKNSAIFLRY ARLLIYKKNY DIGNVDINVI AQVPKISNIR KNIIKNISTV LNIDESQISV KGKTHEKLGV IGEKKAIECF ANILLIPKNS
	PFE0150c / PF3D7_0503100	4-diphosphocytidyl-2c-methyl-D-erythritol kinase (CMK), putative	MNQFLNLKCV LFYFFCTHLF FLHVITKHNL KKEKGYIIRN DYKCKRKRKN NNLKKRSFFI ICKNCRPNNN KFYIINNKGG ENIYNVKKKK ACGYVRLNNE ANVEKNNVVN TNKEIEKLLL DVLDNRNNWY DSKYFSPAKI NLFLRLKEKK ETYNEVSTLM HSLNLGDDIF IRALKKEDQN KLRHFLHPCE SGDFLTIVRM EDKNRDKETL KEDCKIDVIN KSDKDLFKHM KEDIIIQEHE KLPYEYNDYP INNDNIIIKV LKRYREEFNI SDDIRFLIHV NKRIPIFSGV GGGSSNGATV FYFLENIFYK YFKGDNIKAN EFLKTIGSDI SFFSSSGFAY CTDKGNNVTD LKNIEANIKD KDI…
	PF10_0221 / PF3D7_1022800	4-hydroxy-3-methylbut-2-en-1-yl diphosphate synthase	MSYIKRLILF MLLFYSHVKI KKLFIKISNV NIFFAEAKKN GKKEFFLFLL NIKKNSQQKK TYHITKRNTI NKSDFLYSLL NEEGNSSKKE YKNLKDEEKY NIIQNIKKYC ECTKKYKRLP TREVVIGNVK IGGNNKIAIQ TMASCDTRNV EECVYQIRKC KDLGADIVRL TVQGVQEAQA SYHIKEKLLS ENVNIPLVAD IHFNPKIALM AADVFEKIRV NPGNYVDGRK KWIDKVYKTK EEFDEGKLFI KEKFVPLIEK CKRLNRAIRI GTNHGSLSSR VLSYYGDTPL GMVESAFEFS DLCIENNFYN LVFSMKASNA YVMIQSYRLL VSKQYERNMM FPIHLGVTEA GFGDNGRIKS YLG…
	PFA0225w / PF3D7_0104400	4-hydroxy-3-methylbut-2-enyl diphosphate reductase	MSVTTFCSLK KTDKCNIYIS KRAFSVFLFY LFFFLFFHFY FLCSSSFAVI IHESEKRKNI MRRKRSILQI FENSIKSKEG KCNFTKRYIT HYYNIPLKIK KHDLPSVIKY FSHKPNGKHN YVTNMITQKN RKSFLFFFFL YNKYFFGKQE QIRKMNYHEE MNKINIKNDG NRKIYMYPKN DIHEEDGDHK NDVEINQKRN EQNCKSFNDE KNENARDPNK ILYLINPRGF CKGVSRAIET VEECLKLFKP PIYVKHKIVH NDIVCKKLEK EGAIFIEDLN DVPDGHILIY SAHGISPQIR EIAKKKKLIE IDATCPLVNK VHVYVQMKAK ENYDIILIGY KNHVEVIGTY NEAPHCTHIV ENV…
FATTY ACID AND PHOSPHOLIPID METABOLISM
	PFI1125c / PF3D7_0922900	beta-ketoacyl-acyl carrier protein reductase	MSVLHRFYLFFLFTKFFHCYKISYVLKNAKLAPNHAIKNINSLNLLSENKKENYYYCGEN KVALVTGAGRGIGREIAKMLAKSVSHVICISRTQKSCDSVVDEIKSFGYESSGYAGDVSK KEEISEVINKILTEHKNVDILVNNAGITRDNLFLRMKNDEWEDVLRTNLNSLFYITQPIS KRMINNRYGRIINISSIVGLTGNVGQANYSSSKAGVIGFTKSLAKELASRNITVNAIAPG FISSDMTDKISEQIKKNIISNIPAGRMGTPEEVANLACFLSSDKSGYINGRVFVIDGGLS P
	PFF1275c / PF3D7_0626300	3-oxoacyl-(acyl-carrier-protein) synthase i/ii	MRKYIIKIYY FLFFYVLQVN SKRYAFIKRG IPGISKNYFK GFKLYNSREM KNLCETSRVV CTGVGVVTGL GIGIEHFWNN IINGYTSIDK ITKFDITGMS CGIGSEIKKS DFNPSDYYTN KKDVNRNDDC THYAVAATRL ALDDAKLNLE KLDKDKTGTI IGSGIGGLRF LEKEMKTMYE KGHKRITPYL IPAMIANTPS GYVSIENNIR GISLGMLSAC ATSGNTIGEA YRYIKYKEYD VMICGGTEAS ITPISFAGFN SLKALCTGYN DNPKKGCRPF DLKRSGFVMG EGSGILILES YEHAIKRNAP IYGEIISYSS ECDAYHITAP EPNGKGLTNS IHKALKNANI NINDVKYINA HGT…
	PFB0385w / PF3D7_0208500	acyl carrier protein, putative	MKILLLCIIF LYYVNAFKNT QKDGVSLQIL KKKRSNQVNF LNRKNDYNLI KNKNPSSSLK STFDDIKKII SKQLSVEEDK IQMNSNFTKD LGADSLDLVE LIMALEEKFN VTISDQDALK INTVQDAIDY IEKNNKQ
	PFB0685c / PF3D7_0215000	acyl-CoA synthetase, PfACS9	MLIYNFFIVL IYIFQTASYY TKSLTGSSYS EIYSKSLSDD ESDTYQGKDY DNKSPYYIYS HLLKIIIKKN KFNGDKKLIY EYANGHPKSS YTYDTFFNRV LSFSDGLNTY EGTGIQVKKY NEEQNNGMFR LLGLYGSNSA NWITADISCM LSGVTTVVMH SKFILNEIVD ILNEVKLEWL CLDLDFVENL LYLKSSLPHL KKLIILDTFI NPSICNRKGG KSKNGDEGQA VGNNGEKEEK EEHKGEAEED DEDGEDDEDD EDDEDGEDDE DDEDGEDGED DEDDEDGEDG EDDDDDEKGD NIKDDYLYKK QNEIPNENIV EEQGEGEDQR NVHQTVQPTP YGANTKQYLK KKKKKRTENV EER…
	PFB0695c / PF3D7_0215300	acyl-CoA synthetase, PfACS8	MHIIFSVCLF IIYIIHVYPC KSGCLGKDKG YSEICEKAIY ENESNTFCMK DHLIRESLFI YKPIMKLLLK KYRLRNNKIA IVEHAYGEPQ NFITYGKFFR KVLSFSHSLN NFEGQGIQGK SYKEHQNHGW FRLLGIYGSN SINWLIVDMA AMMSGVTTLI LHSNFSIDVI VNILNETKLE WLCLDLDLVD GLLLHRHELP YLKKLIILDN LVKPIRIDIL RYVFNNENNV SEYDDASDDD ENSESSDESF EINMGLAEYD VEKLEKIKDL KERSKNVGIR FLEFDDVSSV PTKIYNIQND EPDFITSIVY TSGTSGKPKG VMLSNLNMYN AIVPLCKHSM LNYHPKAHLS YLPVSHIYER VNV…
	PFL0035c / PF3D7_1200700	acyl-CoA synthetase, PfACS7	MNITLSLFFS VIYVVYVLPC CTQLSNSKKG FAEICKSAEN KNESSVYCMK DYKMKSSIYK YKHLMKIFLD KYKLDNNKIA IVENSCGEPE NYITYGNFFK KVLSFSHSLN TYEGTGVPEK IYNEEKNNGK FRLLGLYGNN STNWLITDCA CMISGVTTLV MHSKFSIDII IDILNNTKLE WLCLDLDLVE GLLCRKNELP YLKKLIILDN LTKRSEMKIE NEEKSNGSRK SSNKQKYNES DKREDISLCA LECDKEKIEK INSLKEKAKT LGLSIIVFDN MTENKIANVT VQNEDPNFIA SIVYTSGTSG KPKGAMLSNR NLYNGVIPAC DCNIIKKYPL TTHLSYLPVS HIYERVVFFI ALF…
	PF13_0128 / PF3D7_1323000	beta-hydroxyacyl-ACP dehydratase	MRFLIIHIAV IVLPFVLMID VKRENSFFLR HSPKRLYKKA DYNNMYDKII KKQQNRIYDV SSQINQDNIN GQNISFNLTF PNYDTSIDIE DIKKILPHRY PFLLVDKVIY MQPNKTIIGL KQVSTNEPFF NGHFPQKQIM PGVLQIEALA QLAGILCLKS DDSQKNNLFL FAGVDGVRWK KPVLPGDTLT MQANLISFKS SLGIAKLSGV GYVNGKVVIN ISEMTFALSK
	PFB0505c / PF3D7_0211400	beta-ketoacyl-ACP synthase III	MFLYFITYLC IFHNNIYSVE LIKNNKYNFI NNVHNIKYRT KIRAIYGKTG GKIIGHGHSY PSTEIYNDEL KKYVDTNDEW IRTRTGIKKR RILKRDENIS MLQIDSATQA LETSCLKPSD IDMVINASST PQNLFGDANN ISNKIGCKNS VNMDLTAACT GFIFAFVTAY NFLNRYKNIL IVGSDALSNF VDWRDRNTCV LFGDAAGAVV LQRTEEKEEN KIFNYYLGSD SELNDLLTIN FDHDKYNLDK PNVNKYGKLY MNGKEVFKYT ISNIPKILKK AIQHSNINIE DINYFIFHQA NIRIIETVAK NLNIPMSKVL VNLDEYANTS AASIPLCFSE NIKNGKIKTN DIICMCGFGA GMS…
	PF14_0664 / PF3D7_1469600	biotin carboxylase subunit of acetyl CoA carboxylase, putative	MINFFLSLLL FVLFFENLVV SIKYRNIHYI HMPNNAHNKN FNEKENREIY HNVNISGGNT IYEEPKNKYI TLFLSNGKKI LHSIFRNNNN NNITICNENT GKNSNINLKN NSENNTKSNS KNYSRGSSSC LNIQNVSNTY YDKRRIKKDI MNKKVEENLI HDENENNIIN DKICCDEKQD LDKEIHVDEQ NEKKSNSTLN NESFISILSN DNSEKKKDME ESNNYSNNFY LNSLEENIIY PTQHVDCDFN GKWKSHVDDI LENDSYYSNM NDNSNKSCIS DYELLKTSIL LNNTKDDFPL YENSRKNILT TSGKINKNKN LKERKKKNLN RLFYTLKLTN NFSFKNSKNR RKYTNSYNSG SST…
	PF14_0415 / PF3D7_1443700	dephospho-CoA kinase, putative	MFLKFFLDKC ILCFLALGSI PIGYINRKNK FRKIENQKYA LFSSIVMNSF LIYLNKFFGI LGIFNFFLGN YLCLIGITGG IAVGKSTFCN FLKKKDVVVI NADEITSKIY TKDSICYKKI VKHFGENILN NDKSINRTLL RKIVFNNEEN VKYINKITHT YIILQIIKEC LKYKFLYFKY NVAIEAPLLI ETKLYLLTSP VILLKSSVRN QIKRILSRDK NCTYDTAMGI IKNQLPTDEK IKYADIIINN DGDILDLQMK CDVVYNKYLK NFFF
	PFI1485c / PF3D7_0930500	diacylglycerol kinase, putative	MEDFAYIDKN VYINILLVFI KKIKDYIVGI GILKILFCVC IILLSIFIAK RKNKKKKKIH VYLQLNRKKN NSTKVSNSSK KSTISNEDEI SQKNLSKISD NGKLEEISNG YYHLTYTSHI FNLKTINRIE LCNVCEENIY SFFFHKKNIF ECIMCRNKCH IECAPNSNLM SCKTSVFFKN KHKFIKLRNC SWNDKCDICD QKFYFFSLYT LLKRHIYKCI WCNKYFHLRC LIKNSYKKKK IIKEDENVVD TQKMKNLCTY GNNEYILYPY QLTIKENVLI DFLISAYNKV QENDIKLDDI FLSYTLNDFY NLEKKFKKDM IEPIEHFPSY KFRSVNDLLY FDYVNHFKSF RNIKKKKKKK IIQ…
	PF10_0407 / PF3D7_1020800	dihydrolipoamide acyltransferase component E2	MLYNLIILIF YLRFSKCISK NNNYGYINFG TFSNVVNNSN NLRNRKNVVF SKIEIKMPAL SSTMTTGKIV KWNKNIGDYV NLGDIIMTVE SDKADMDVEA FDEGFLRVKR LEDGCEANVG DVLGVLTTEE NENMDEKKYN DGDINKTENE IKVLNPDKDK SEQIIKEDIH FVKKHINDDV NEEKIFIPFI KCKKKKAKIN KWLKNENDFV KKNDLLLYVE DDKSTIEVES PYSGIIKKLL VKEGQFVDLD KEVAIISITE EKDNEKEKIE EPFKNKEDEE INRDNILIHY INKIKKSEEG RKFLKNLSEQ EEKTLEERLK LNYEKYNKIS NDLFRSSEST KDYVLKEKEN ESQYEMVLPS ASE…
	PFF0730c / PF3D7_0615100	enoyl-acyl carrier reductase	MNKISQRLLF LFLHFYTIVC FIQNNTQKTF HNVLQNEQIR GKEKAFYRKE KRENIFIGNK MKHLNNMNNT HNNNHYMEKE EQDASNINKI KEENKNEDIC FIAGIGDTNG YGWGIAKELS KRNVKIIFGI WPPVYNIFMK NYKNGKFDND MIIDKDKKMN ILDMLPFDAS FDTANDIDEE TKNNKRYNML QNYTIEDVAN LIHQKYGKIN MLVHSLANAK EVQKDLLNTS RKGYLDALSK SSYSLISLCK YFVNIMKPQS SIISLTYHAS QKVVPGYGGG MSSAKAALES DTRVLAYHLG RNYNIRINTI SAGPLKSRAA TAINKLNNTY ENNTNQNKNR NSHDVHNIMN NSGEKEEKKN SAS…
	PF13_0100 / PF3D7_1318200	glycerol-3-phosphate acyltransferase, putative	MIKFSVLSFL TTLFLVVLKF HVVKNVKNKS CFLNTFGVSP IVTKLFPKYI DKSINRKVPI TCKKSKIITF LNNNIYEDAY DRIMNKLDLL IKESYDITDH INTFKGFLRK YLYEIKKHKS CSSQDFLNNF LIYIDTFKKY QNYEFPNIHR YDQTLYEWSL KFWSELIDKK NSKFLGISNI KKIEEWRDKG HNIIIFSNHH IEADANIIKY FFHIQDSEQI SRNIIFIGGH KIRVDPLSRP FSVTANLLCI YSKKYIENPP HLKEEKTLFN HKSLNVLRNL LNKGKQIIWL APSGGRDRKG ADGKIHISPF DPKIIQTFNV FAKRSKVKTH FIGLALNTYN ICPPPNTIDV DEIEKERTCN YSP…
	PFD0980w / PF3D7_0420200	holo-(acyl-carrier protein) synthase, putative	MIFVLIFSKL KGAFYKILKL LCLYLFLYEE EYVLFYGKVK SLNTKTNAEC TYVGMRKGLR VKPFKNIKDK NGLNILSSFC KRNDITCFNK INNFFCIGKN RFFRKRDILF YSYIIQNMFM KRIYMNKGKR NTYYLINEHM KNDEYIDCNR RKYKKKLFNI YMEYNNMLYE EGDNFYDNYK SNSFLEINNN QVNIPIDLSR FEKEVRKLIE ILNYKNFHLN ITFVSLEEMK RINKKHRNKD MATDVISILH YLDDPNYDYN YDFLKNAIGG KKGFKSGDIY LCPEYINREC FLSRMNYEKS LLDKKGDSLE YVSEMKKNVT DETFEDITEG SINRTSCNVY DISVDDNDVG ITSFDKVSKN VDT…
	MAL13P1.335 / PF3D7_1366800	phosphatidylserine synthase i; putative	MKSVYLFASS LLTTLLLSNA NVLLDFNTRI IISLVMSLFN LITLYYVMQK YAKTPKISIL TKILNYLILI YYVIIMFLHF FSTSEVRTIL RFLNKNIEFH AVEKSYMENC NNLANISDKI DWFVCAHLWG WFAKGMIIRN FFLLNINSVI FELIELRFQH ILPNFYECWW DHIFLDVLSC NLIGIVASIL FMKYFNIELY DWKIPDKIKP NKKNIIFPTI DKLCRKVFTN SSTLLILIFL SFITNIIDLN VFFLKAEIQL HHVNLIVIAR TFAIGFISGK ACKEFYRFLK EGMTPKRAFY IFLEIIILSL EFLLAIRWKD TLISDKSDLT GINMVWLFIT STLSSILLLL YVNESLI
	PF08_0066 / PF3D7_0815900	lipoamide dehydrogenase, putative	MVIRQNIKHI VKLNVVTLIW LSYLFLLKPH GTLKNMMVCN AVLLPFNEKN KGINNFVYIN PKNIILNKIK KDVIKLEKDN IILCQHNRKR DNYIKQQKRK EKNANNFTFM LKGSTQNIMN INEKEYDLAI IGCGVGGHAA AINAMERNLK VIIFAGDENC IGGTCVNVGC IPSKALLYAT NKYRELKNLD KLYYYGIHSN IFQNNKNTEI ENNQLVSNSF QINITKLKEY TQSVIDKLRN GISHGFKTLK FNKNSEHVQV IYEHGQLLDK NTIKSKKSGN TYKVKNIIIA TGSVPNIPNN VEIDDKSVFT SDMAVKLVGL KNYMSIIGMG IIGLEFADIY TALGSEITFL EYSSELLPII DND…
	MAL13P1.220 / PF3D7_1344600	lipoyl synthase	MHFGIPSLFY LYILFSIIMR IKCVITKNLK KTKKRTCSYI PHGNMEKGII LNYIEKPNPA YLKRGKNKNK NKNKKGDIYK LRNVEILLYA NRYVHEGNEN FSSTTKKLLL TPKVGNKMPE GKKPDWFHVA APTVAKYNKL KDDIKKLNLH TVCEEAQCPN IGECWNIGTA TIMLLGDTCT RGCKFCSIKT SSNPLPPDIN EPFNTAKAIC EWNIDYVVLT SVDRDDLPDG GASHFAKTVE LVKFSRPDIL IECLVSDFQG NIDSVRKLAF SGLDVYAHNI ETVKRLQKYV RDKRANYDQS LFVLKTAKEI NPQLYTKTSI MLGLGETKEE VIQTMYDARK NNIDVITFGQ YLRPTKNHLS IVQ…
	MAL8P1.37 / PF3D7_0823600	lipoate-protein ligase	MNKINLLVLI SLTFIILLNP KMKVGKLKKR KNSGLLYPYF KNKSFRLNRY IFIKPIKSVK LNYKKKKMNL THEICILNCS EKLIDYKLAF QLQNILHHSK IIMKNKNEVQ ISNHLELKKF KNFKENMEKY DFCFILQHTP CYTLGSVANC SDILLDKENY YIEELGDIYN NLYSNEIIHL MNKCETIQDK INQSDIYNEN TNYFNNFLKH CRQRKIPIYR VNRGGKATYH GPGQLVLYFI FNLKNYPSNY NERIINKHYK YTNKENFPSK TSEYEKNNIY TNSNSKENIS SIERTFDLRT TINNFQKIGM ETLQKFNIKT HCKKDTIGIF YKDKKIISIG LKITKYISMH GLSLNFNLDN NFL…
	PF13_0066 / PF3D7_1312000	malonyl CoA-acyl carrier protein transacylase precursor	MQVIFLHSLT FIIFTVLLIL ILPSYCFIIK DSKIINDTWK YENKENTNKI GSYRKKLRHN VSVNKDIKGN EHIMSSYENE KYIKKLLEDY EKYKITTYSS EYTFFFPGQG EQYMSMGLDT YNNYKECKEL YNDASKILGY NLMDMIKNGP IEKLKNSEVA QPSIYTVSMA SLEKLKIENN DAYMKLNLCM GYSLGEYAAL TCANSLSFDD GVYLTKERGK AMQYCSTLYN MTTVAIVGLT LDNIKKLIED VNHKMNDDIF IVSYMTDRKF GLCGKPESMD YLNTLAKEKY KAIFTKKLEI AGAFHSFYMF PAKETLKNVL NQITFKKLSV PVISNVDGNA YDDPVIIKDL LILQLTSPIK INT…
	PF07_0129 / PF3D7_0731600	acyl-coA synthetase, ACS5	MNISFTVCSL FILLINVVLH GAQKNSEKNV YTEICEKPAN GNESSVYCMK DYKKKSSLYG YKHIMNFLLG NLNKHKNNIA VVEHDNGEPN NYLTYNDFFK KVLCFSNTLN TYEGKGIEEK MYKKEEKNNG KFRLLGLYGS NSINWIAADM ASMLSGVTTL VMHSKFSLDV IVDILKETEL EWLCLDLELV EGLLAHRNEF PHLKNLIILD TLNKSNKINS KGLEKSDKNK KSKEKDNGLV NVDYDKEKLK KIKDLKVKAR SVGINIMEFD EMSRKEPKKI KINNEDPNFI ASIVYTSGTS GKPKGVMLSN ENFHNTVVPL CDHNIIKEYN PKTHFSYLPV SHIYERVLVH ILFMLGGTIN IWS…
	PFD1035w / PF3D7_0422000	steroid dehydrogenase, putative	MNGFSSGYMR FIFFIGLLVI LKNILYFFFW LFNYVKSKIV LKNLKSYGDT IIITGCTDGI GKSLTYSLIN QNVNLLLISR NESELKNMKR DLLEKNKNYK GTIEYITFDY NANDFNTYKI IEAKIRSMDI GILINNVGVS YPYPLYFHEM EPQLIEQLVN VNLLSSYYMT KLVLPNMIKK KKGLILYTSS GVTSLKSCPL YTIYGSVKDA ICSFANSLSV ELKEYNIQVQ CHVPLFIVTK LSKIKNPGIF VPTSDIYAKC AIQKMREGNV FSYKVISSPY LFHKLQIFFY NCFPKVIFDI VTLEFLKIVR LRALKKFKKR E
	MAL13P1.285 / PF3D7_1358000	patatin-like phospholipase, putative	MVKNVYIYFV YLVYLFHMFS LSLRMQKNIF KYITPLSNRF NLTKIRKLKL FRKEKQKKQV RVFNHVVNNY IGLDLFFTKL NNITSNHEKL NYINFLQQIV EDKAYEHLLF SNNYMRIIIY ILNEKCLVIK KNEEKYDDLD YEIIYRILLI FKNLTRYKSF YHVILNDYTH KNKKISLLYT LMNILNEKND FNNYSNNNFD KYKEYNSIFN YFTSFFKNAE DTKNYMTQDS STELDSKMKN EEQEENEKIN EINKMKNKIY DIGRNILLKL KDEKLKVENK INSQYVRGSN HFTNETSTDL KSTKDQEDIL LEEKKKSDDE YVDKDNYNTT ENNFKQEHMN ITHKNQNNQD HLYDDTPQND NIS…
	PFI1180w / PF3D7_0924000	patatin-like phospholipase, putative	MKTPEFSLDS LKNNRKKKSK KLNYENWSAH YFLKLPIFVI LMIVFSLNAF IYLLIRFFIY FFENTSFWMI TKYKDFHFFV RKKRNGKTPS SSSSSSSNKR KYNDNINNDD EPILNKNEKD DSIFQIEHLM NTCNNYDDYI KYAYSMDVLT GKTVHINEND DYINIYDVHL LKKTSESIQT NLLNKDILLL LEDIKIATSP RIKGIFQEKY YCKTYSIPHL IVTEFINNVM NGLNFLENYI EQQKQININY KFSDEYLVIK KYFKDIFRQW GNTALFLSGG AILGLHHFGV LEVFLKSSIN ADYFNHYAKK LTTQKKIKEE MLPRNSHGND ISNDINKKDI HKDSQDKKKK YIILKSNSNN EKK…
	PFI0695c / PF3D7_0914200	phospholipid or glycerol acyltransferase, putative	MIRKLEYHII SYIIFALHVK LFMHTVFYAE WVWDLFHIYF CTIIVYVNIL LIYGIRIYFG LKKLDLKYFP LEKIASCTNY KNKKNIHPYA AFERLDLINM KFMNLFYGII FVATWKIAFI FFLSLMNLMV SLLIYPFLKG KSDNLESSIL FLYLKFLKLV CRLAIWVFGV NKIENNYLCD NEWPKNIVSN HISAVDPLFF ISEHACSFVA KKSLSKDRMV GPSVLALKCV LVYREKSEDR KIALESIKER QLLINAKQNN YPSFVIFSEG TTSNGLQIIE QKKGAFNSLL PITPVLLIYD YDFYNPSYDI IPFTWWIFLS SSNYQGSTLR TYWLPKVYPP DKAQYPDLTD EERINIFHDE VSK…
	MAL8P1.202 / PF3D7_0805600	apicoplast phosphatidic acid phosphatase, putative	MLTKVYLPTL LHVGYLFNTI QCINIINYLI FGGSDKDSPN KNSSDNKEEK NKKMEEYIDE KMKINLRSKK INSLKPIYTN TELETNYYID NNETFKKLYA NYPICEAKYK LVDKLKSFKI FKKLMTDKPK KIILFKTCII ELYGMLSVTI RNVNNFSSVI ATVYGYVPFL IMILTVFGFI ITFNKNLLYI IFIMPTQTLI SDLFLKRIFK KPRPINSALP TYGMPSSHSS FAIALLTFLL LHITEQKKDK WSIITYVIAT LTLLPIPWSR VEVEDHTVLQ VIVGSLVGIG FGFIFYFMKK YFFKHKDS
	PFE0555w / PF3D7_0511200	stearoyl-CoA delta 9 desaturase, putative	MIEMILSYVY KSLAGVLHTL NKSYLDIKDI GVTYLTYFIF LISCYLLKNY FSFKFLNFIR IVKSSIVLII CLISLKYLDL NLTLSINFFY LYNILQLSNF LEVSTSQNKK SNNKSKNVEA KVINKYELRN ENEEKNYELI GDTSKHLEKI AKKILNNKKK LEENECILKE KEIIDEIERK EKEEEEIMKM KNNLNAKKNK DKRKDKINLY GIYVFFLQTF YIYFFYFFWN YIQNLIIIKI FLTLQLVKCL ISFVSNFWIN NMNINLFKRM IHILDIVYMF SISLFFTNIL YNISQNTHFL RNFAVYSIVF HVYYAYVLFV KYIYTYHKQF RSSLFSFILF FHVFGIIGMI KLYYHEYGKS LLI…
	PF14_0441 / PF3D7_1446400	pyruvate dehydrogenase E1 beta subunit	MGRKRNNIVN IRYNFFLIYF WVIFMYPCET NKGNVKPLNF IKGKNIFLNI TKNKVKHLNT INGIETISNV ENKNILNDTN YINEMKNIKV RRNISEALHM AIYEEMKKDK GVYVLGEDVG LYGGSYKVTK NLAHFFGFSR VLDTPICENA FMGLGIGSAI NDLRPIIEGM NLSFLILAFN QISNNACMMR YMCDGQFNIP IVIRGPGGIG KQLGPEHSQR IESYLMSIPG IKIVSCSTPF NARGLLKSAI RDNNPILFIE HVLLYNYEQE IPLLPYTLPI DKAEVVKNGK DLTVLSYGIT RHLASEAAKE LTKFNIDIEV IDLISLKPFD METIEKSLKK TKKCLILDES AGFGGIGAEL YTQ…
	PF11_0256 / PF3D7_1124500	pyruvate dehydrogenase E1 alpha subunit	MLLVIWLNIF WFIPYYCFNY VLCVGNKNDM LFVKNKNLIY PYNDMNRIRR HKGVELSRKM VAENIQMRNM KSNNNSNNVH ENNNIDHSNN YNNNLYLSCS NKKKGKDVQS LCAIKHGNVL IKNINEEEKE KGIKKNDTDK LESKNDNEHK NEENNFVFSY DKKLNNYSEF NIYMENNNIE EYISDVNISR EEICTLYEDM YLGRLFENLV AKLYYNKRVN GFVHLYNGQE AVSTGIIKNL KNSDFVTSTY RDHVHALSKG VPAHKILNEL YGNYYGSTNK GKGGSMHIYS KENNFIGGFG FIGEQIPIAV GLAYSILYKN EFHYNPKNTS FTSTKNKNNY IQENENMIHM NNSQNVDVVV CFL…
	PF10_0363 / PF3D7_1037100	pyruvate kinase 2	MNLIHICLFI IVIKCYVNCI KKNNKHIAYD KFYKQGSNTI VGSGNGSGDL LFLNNININK NVERKKNILA HSEIGTVRNI DDINLLNHNK KNEISFTKCK QIATIGPASE NFEQLEKLYL NGIDVFRLNF SHGLKSIKKY IINSIRILEK KYDTTIGILG DIQGPKIRIG EFEKNQINEN DNNTFVELKE GDLFSFDLMN SLGNQNRVQL NYPELIKNAK AGQIILLDDG NLKMKILENN YDTSNIQNSY IKVQVLTGGK LYSKKGFCIP NMIMPIDVLS EKDIKDILFC INEEVDFLGY SFVQTEYDLI FLRNIINDYY ESDFYNNIKR KDRINFDQNN LQMKTFDDEN DFYIKEVNDY YNN…
	PFC0831w / PF3D7_0318800	triosephosphate isomerase, putative	MLKTLVLLSF YSLYTVFQKS TNCLTIYSSF RKKGKECYVL ISSTYILKNK SKKLSRDTCR ILKKFERNNS SDKKFIKTYC IENKNDYMEN ILTHDEQKKK KKKKKILIAN WKCYLSKEEA YKLIDSLTRI KYSNYVDVIL SLNLLYIPYL LQKIKENNSK IYACSQDVSL VNGFGPFTGE TTAKLIQDFG NEYTLIGHSE RRQGFYKNGE TIEEIVLKVY NAINSKLKVI LCTGDDYKNC DNPSSSYKMM ELLRLIKTKI SKDEMKNIII AFEPRFAIGT GQPVSYDILN KYYYELKRDI AKEIDKSTSE EMMIVYGGSI SKSNMKHYVD NTHVDGFLIG KASLNEDFID IIRYVDH
	PFC0260w / PF3D7_0305800	P-loop containing nucleoside triphospahte hydrolase, putative	MMKIFINNVN TYSGSCFCKT FDEIKNEKTT IYGTVDDHNL SKEDCIFYNY DNVKKIISKI PKDNIVKYIL KCKLVIYDLH NTDLEEIEYV IRKLKYEKIK HNMTIILISS IMTWSKTKRK FIKKIVEENK EITKNQSNNI THKSGETNNN LEKKENQNIE TKNEKTSKKK DKKKNENYNK NNKIVDHGVH NKQANIIKNE DAKSNIQEIH IEEIKKKEKI LYIPQIFNEK DYLKRISSTH FDEYKSVETL MLSLNSMKNI KTHVVVSGLL YGNGENVFFS IFKNAWLSKD NHIIDKGDNY IPVIHIRGLC EYIKQLYISE SKKKYLIAVD NQYITQKEII HTIASHISGN MNFMHVSPHE SIF…
TRANSPORT
	PFC0125w / PF3D7_0302600	ABC transporter, (TAP family), putative	MKYLFFSLFL CYNLIVYIYC VSKNAYNIKE KRRGECNFPI NNQRCNNNMN SLIMNKYLYK KRKHSNTLPF IKTYNNFKEK NKNDVVQISY YSINHNKKYN NKIHTHILFM NNNNNNNNNS NSNKEYIKAN NANMLFSIYN KISEDGKTKN SLLSDISKLF KIVKESKLIF VTGFLLTTLS AIVDSYIPIF LSKTVSFVME RKKFTFLKIH KTNLSVVKNL IEYLKFYSTN PFHMYVLISV ISLLFSSFRS YIFNVCAYVS TNKLQKYLFN VLLHKNINYF KKKGKGELIS RLNIDSSELI DIFTTNIIVL FRNMIKMALS FYFLYKINVH LFIVSLFIVF IISNISIFFS NIFRKLAKEE SNV…
	PF13_0271 / PF3D7_1352100	ABC transporter, (heavy metal transporter family), putative	MRSFYNKCFT NKLISAHSLF CQHVSTLKNN KKECFEDVKR SNRISDEFYS SFLYHSYIEN LKSTKEYVYF IYLQDIYYNI NIFKNKGRLY ISNNGLCNDK LKDNNNNNNI NSNNFGNSYN AYTKKKSFYH SFNDLNEAKE IRKKRKNEKS EKNIVEYLLC NIINPNENYH IQNIYNHNLN NNVSIEIHKK NDSVMYHYNN EKKTKTSKMT TDIKLKQINN VYIKYVPYKN KIITLACPNK YYPTLYRYFS SHTNKKEDAE ENDKNKNINI NNVDNRYKED FMYGCENKND SEKHKKTTNN NFGDEFEKLK VKELDKILNK LEMLYDNKNN KMNINVKILG YIFKNFLLKN KELKRKIFCS LFF…
	PF08_0078 / PF3D7_0813700	ABC transporter, putative	MFLELYFYLI LCCYISFNSS LQVKKNNQYF LNSSYNRKGT SRPSRRKKNS FINKLFLAEH VNTKKSTFRC YQQCKHKKNV ESGNDYMCDG VKKKRKKSGN NKKSDICHYD EDEEGIIAKP YYDDYHRENR NDIQYDINED NNYEESDEDE LEEDEYEEEL EEDEYDEESD QDEYDEESDQ DEYDEESDQD EYDEESDQDG YDEESNEDDL DEHLKERLMK RKSFYSKLFN IDDNEDKFNV LSPKYNMNIY NILEKNYDQN EENQIVLTIK NLNYEINNRK LITNLNLQLN KTECIGLIGN NGCGKTTLLN LIYENSDNKL KSFTLNNNIK KKEDAVSLNK FNLNTLSSSV KKNDFTLLYK ILS…
	PFE0805w / PF3D7_0516100	cation-transporting ATPase 1	MYKNIFFPHD NIKKETYKVY YYHTNNLIHD EYRISYIECY KKKKKKIVTI LHYVFCILSL GLLPLILSWF PIFYFRLLHS ACTLNECEKV LIITKDGNKY IKKIKKIKFN HNVCYVMNDV FFSEDQSMSS MYNDKEQNKN NFNYFSRDYT FRDQNIMNER KDNINLKDHI KLSGHINLKD NIKLSGHINL KDNIKLSGHI NLKDNIKLSG HINFKDNINF KDSIYPCDEI LHVDNIPLHN NLNINSHQPF DETTEYNKSR LQDNNRITYI FEFLDIRYVY IKKKNIFVEL YFNINYPFSY MHLMCTGLRN EKLINDRKIL YGECNLNIKS DSFIILLFKE IMNPFFIFQI FAMIVWSLDN YIE…
	PFE0195w / PF3D7_0504000	cation transporting P-ATPase	MARFCKSDKL LINHRELKYI CLFYIILLFC FFLWCIFKKY HENRINRKHK RKGSDSSHKN EKTEFFNYIY ESYNDNDDVI IRQEGYKNSL CGFLLKNISI VLYLLTHFII ILLIGNEYCI KENGEILWND RAFVFFIFLL LCFIITYGIL TVRKHMHSFF IKPSLLKDSD YVLVYTKNED YTNSYKNIFK ESYVYITNVF IKWNKKIYKY SCKYIKLLHY YQMNAKSFFF FISTDKKKKK NDYIKNSYHD DDLDDDDIQN KDNNNYYYSN IYKKNSYYNN SFHKKSISNQ YSNKRLSRNS LYTKKVLRDQ ENNLGYYDQD QNEINKMNSI DHIYNIDSLN VIDQGNDKNY DNEEKEINKK YPF…
	PFE1510c / PF3D7_0530200	triose phosphate transporter	MNVLTRTLII TIFFNLQIYI GKCLNHDNIK NIKNVPMNFH LKNTNGKIYQ KNKRPSQINR KNTNKQAFNI PVFSIPNYKP KYNTCTKTKN IAFVNSRINQ AHNRNIQVTK AAELNAIKKI KNDKKFTLFN SGNRDNIKTY EHDINKGIID DISTTNNSYS NIGDTSENTY QPNNFNNTLT EKKPCTFLNK AVEVGKTVSL LGMWYVCNIF YNIENKKALN ILNMPITIAI TQIYVGLPIF LIPWLLKLRN QPELFYDEQE LKRINMSDRN ALIKGFQKYV LFLKKYSSIM KQSIYHGYAH LLSVIAMGAG AISFVHIVKA SAPLFAAFFS YFFMNNKMSI YTYSSLVPIV FGVSLASIKE LSF…
	PF11_0466 / PF3D7_1145500	transporter, putative	MRNYGLLHFL LVLLLLNLSI KSKILNRNDH IKYNSSVMYI RRKKKTIENG TFLLNKKIRN LRNYANVYKI YNKTQKRKKL KNLISPLKRF NSVLSFLGCH VCNKIFEVNK KNKKGYDIFY KKSRLNVVGI WKKGKRNPYN RWLYLYRRNI GVLSNIKKKY TYYLDRIKNY IEEDNMLNFF YICKNILWKK SIFFLTIFVM INSAIISIII PRYDNIIFSE LSNRKFDRFG YLLCNCILIR VLNIFFCGLR NYIFMITSSY CLKSVKSLLF RIYLNKDYEY YDKVDHTIII NKLTLEAHNF SDIIPYYINP LIRNFFSIIL NFSYIFYLNK KLSLVILYCF MISSLLSMIS SKLKKSRLKK INR…
	PFE0410w / PF3D7_0508300	triose phosphate transporter	MKDNEKKNEY GTFPITINEG YSDNVGDNKL KSKGIYHKLF EKLKLALLFL TWYTLNVLYN VDNKKALNMV KLPWFISSMQ LYVGWIFIFI YWISGMKKIP KIYSYDIFIR NILIQSVCHI FVHFGAVMAM SATSVSFTHV VKACEPVFTA IFSILLLKQY LKINKYIALL IIVGGVVCAS MKELHFTWIA FWCATLSNFG SSIRSIYAKK MMTQKSLIGE NLNASNIYAF ITIISALISL PLVLAFEGKE TYNFLVNYQG TNYTFKDVIF KIILSGMWYY FNNEVAFMCL ERVNQITHAL ANSIKRVVII VSSIIIFKTQ ITLLGAIGSA VAIFGAFLYS IF
	PF14_0369 / PF3D7_1439000	copper transporter putative	MCKNIYFYII LILKLFIVLA DKSDNSICKP SVKISCAHNC CKNKLSFMYN CWKHYDKYSN IIKDNLQKEE DTVVQLQDHD NIDIVEHVET MPMSFQLTTH TIILFNKWET KSALSYYISL VLCFFFGIIS VGFKVVRLNV EQALPKTEDT NIFKSLVLFK NNSYRMLLSF VIYSWDYLLM LIVMTFNVGL FVAVVLGLSF GFFIFGNKFV SSKKCSPDDL DVHKEFTADP ACCGC
	PF08_0078 / PF3D7_0813700	ABC transporter, putative	MILKKVYILI ILILLSILSR TVDSGUSKQL HIKLPDEDDD YLAKLIGVFN DICTYSINNK EKIAKILSTS AVSVYTITSL YNSGITFKKN PHYSFFLPSQ KYILKIINNN VNIQNNDIKK IDNLKDIPIF ERTFTNKHNI QMSKTYILNN FINFINFLPY KLKKESLYNF SKYKEFDGLK YVENPFTQVQ VLNHEDNIIV YQAKTKKHYW IHLPFKYNII KISDDNTTSY ILMFIPLYKY YSNYIIQMKI TSNNNNQNVT FSSCIKQEKT EHIQNNSFHY DIIKNISKHI TYDIINAIDN NINILYMRNV KPGKYNFINT TNALQKKTKN YKKKKFTLPS FKSLPFKFKR T
	PF14_0211 / PF3D7_1421900	Ctr copper transporter domain containing protein, putative	MQNIYKSYLK YYTLAIFCLT FTFDFVSSSC CHSKNDDGVM LPMYFSNNEN IKMLFDIFQV KNRYQFIFCN ILCIIMGFFS VYIKVLKKRL HHNVQKVADG GDGSYVNMSP CQNVNYGFLS FLHYTIDYLL MLIVMTFNPY IFLSIMTGLS SAYLFYGHLI
ANTIOXIDANT
	MAL7P1.159 / PF3D7_0729200	1-cys peroxiredoxin	MRMRRTILIF TVILIPLTFC FKNALIKHSI NIVSKRGNSK NRFSQKVYES KNIDLENDIK ENDLIPNVKV MIDVRNMNNI SDTDGSPNDF TSIDTHELFN NKKILLISLP GAFTPTCSTK MIPGYEEEYD YFIKENNFDD IYCITNNDIY VLKSWFKSMD IKKIKYISDG NSSFTESMNM LVDKSNFFMG MRPWRFVAIV ENNILVKMFQ EKDKQHNIQT DPYDISTVNN VKEFLKNNQL
	PFL0595c / PF3D7_1212000	glutathione peroxidase	MFFSMFIKFI LPISFICYNF GKKFNMFSYF QKIKVSEQEL LSSIYDYEVK DLSGSNVSMS KFKNKVLIIF NSASKCGLTK NHVEQFNKLH EKYNARGLEI LAFPTSQFLN QEFDNTKDIC TFNEKNKIKY NMFSPIEVNG DNTHPLFKYL KKNCDSMHDE NGTLKSIGWN FGKFLVDKNG EVVNYFSPKT NPLDLEKIII QLLQK
	PF11_0055 / PF3D7_1104400	conserved protein, unknown function	MKTNIFSCVI SFFILLLFCK AYNTSSLLET IKHDLQIVNN SNFNTVVNKF RNEKVFAVLF FKKSNKNIKN VIKNYNDVAS KFKGILTLCV VDCDENASLC ENELSLYVPD YKSSNTHHFL IYPINPMPKF VFKDEITESN IKKYTYLIPS KIDIIKDTQS FNVFLSKHEN MPKVLIFSNK KKPNYVLNAL SNSFNKKLMF AYINNENEEL VAKYNVKNLP TILLLKKNKV VDTYKGKQNY INIFDWLNVY SETFVLGGGF DISPDKTNEK PWKFELIPKF TKLSHGDICF KKADKGLCLI YLKEGEKLEK SEIDMLLSLK EKFKPHIDGR GINFRFMWID IAMETHFRSL LEFKKYPSVV VFN…
	PFF0230c / PF3D7_0604700	glyoxalase I, putative	MKLFVVVIFV LFILLKRYKC LSKKKNRCHY FINRDSYHLK KKKCKRKILK CKVDGIEYKV HDLDKSINFY TNVLNFKVNK KEKDNAQLIL GDDGAYIKLI QKGEGNFTIG EHSFLGLGVH LKNFDINKTK LYEGKIDEEI DKRPVTPCIL PDEDAQVRRF WTNCFITDPD GYGIEVVLQN ESDKLDRIRF FTTSTKDAQK FYSDILGMQL VKIQSHLEEI SYPWNIYGGM SYYFSSENNS TILQMAYAYD EEELHMGNSL GNLILCSKNL NLIEKKLNEN NIEVIKNDKG EILVKDLDGY NVYLKDK
	PF14_0508 / PF3D7_1453500	pyridine nucleotide transhydrogenase, putative	MYRNIFASII LCLLLFLSSN CYGKSNLRNY INGFNEFIED DKNSNFEIKL PVINFPVSSN DITNDYKNEE KASRDNLLNN EEIEPSTYYS VLPSLLNAVY LFSSICFILC LTGLNAHRTS KRGNILGFIG IVAAIMITFS QVGFGFRYKL FLLIVIPAIT IGIYIAHNVS MVQMPQLVAL FHSFVGLAAL FVGFSKYHSE SFENYEISTI HLLELYVGTF IASIAFIGSL VAAGKLSGIL DSKSLKLQIK KIINILCIVL IIILGYYFVT LKLLYLKSIC LYISLIIDSF LGFHLIASIG AADMPVIISV LNSYSGFATA ISGFLLHNNL LIISGALIGS SGAILSYIMC IGMNRDIFNI ILG…
	MAL13P1.324 / PF3D7_1364600	aldo-keto reductase, putative	MPRLVIFYFL IFVFMKINCI NYNSFSKRKI NYHLIRDKQE NIKYKYLRED EKLNLSRRNR TKRTKETNGG TQRIKRIKRI KRIKRIKRNN LSNIFYNKND YMIKKINVPR TYFIKNMGNS SLKGCIYKEK KTIFNIYNIY DDKNIMNPKN FGNEDGNLLN KLGNDYSDKD SYNKNMNDKK QIVLDNKNEK MYIENMKKNL SRTDEVTYKY VEEMELKKIN IKGVDIQYRL YNLEEGIYIV DKENYEKIKK LWDKDELKKA KENFEDTFDI KKQGIKDEDW IMLPFEYEEN KNIKLVKADF DNPTYDYILT YYDKERNYYW EYKRRNYYKM FKNTVHETPP YKSDLEEDKR YYGKEIIIPK KKL…
	PFF1130c / PF3D7_0623500	Fe-superoxide dismutase	MNLKILLCSS IFLFFLKPNV PKGAYGLKNV CKLNFLNFNG FLPLYKTNKY FSKHDENLYE SWDVKPLWNA KPFSLMKLPF NPQDMSPFLS EEAIKYHYSK HHATYVKNLN NLSEQHKDLK SLTLEDIIKK YDGSIHNNAA QIFNHNFFWL GLKEQGGGMP YGEIKEKLDE SFNSFENFKN EFIKQASGHF GSGWIWLIIK DRKLEIFQGH DADSPIKQNI GKPILTLDIW EHSYYVDYKN SRADYIKEWF NKINWDFANY NLSISS
PROTEIN FOLDING
	PF07_0103 / PF3D7_0724400	mitochondrial import inner membrane translocase subunit tim14, putative	MWPVVMLLFG GGVLFVKKGL NYVKNQGIQL NGKRSFFPSG FNKNLNNLFL KNDLKGFERN MSKSEAFKIL NINPTTNKEK IREVHKQLML KNHPDNGGST YIAAKVNEAK DILLK
	PF11_0443 / PF3D7_1143200	DnaJ protein, putative	MRIHCFSFVL LYFLFVNNVN CLLKKVLHHF YCNNENCYDI LGVNEKASLD EIKFSYFRLL KKVEKNHDRE KKKRIVKAFN VLVNKSTRKY YDYYLKYPNS FLNLVYLNMY IFYKLFKIIC ILLLIGLLLC VFQYIHNKYE LKRVIQKSSK NKAFKKEVQN RISSQHPGFM NYDIKKKKKI EEQIEEEVVQ EIVMINNQKT KKLLLADLII VKLLFLPKQL WFYIIWNIKW VIKYNILNED YDEHDKIYIT RKYMNISMDK WNTLNPEEKK NYLKKELWMK AKQEEFLQEI KERDRLNKIS SAKYKKQIRM KKKGLSFNYN D
	PFL1545c / PF3D7_1232100	chaperonin cpn60	MRMKRIHILL LVIFLLCLRY GYSIKKKRSP NNKNRLFINK RLKYINSKII SRRKENYVKM KMTENKVKGK DIIYGNECRN ELLKGILTVS DVVKLTLGPR GRNVLLEKEY GSPLIINDGV TIAKNISLKD RKKNNGVKLM QESTNISNDK AGDGTSSTAL MTATITKKGI EQVNRNHNPI PIQRGIQLAS KMIIEKIKSL STPIKTYKDI LNIATIASNN DVHMGQIIAN AYDKLGKNAA IILDDNADIN DKLEFTEGYN FDRGIINPYL LYNENKDYIE YSNVSTLITD QNIDNIQSIL PILEIFAKNK QPLCIIADDF SNEVLQTLII NKLKGAIKVV PIRAPSFGDR RKDYLKDLCI VTN…
	PF13_0180 / PF3D7_1333000	20 kDa chaperonin	MKIIFLLNIV ILFLTNVLTK KHVISNTLNF INVNPKQFNN STKRLKATEY KIDNKVIRGP LTPLNEYILI QKDEAGDTTD SGVFIGDTLK KNQYIGKVLS VGAGAINTKN GERIPIDIQV GDVVIFNPND GNKVKYNDKE CLLISNEEVL GKINDSNEIN PLNITPLYDR VLIKLINPNV NSDSLIIIPE SKNNDKVTDG QVVAIGNGIY DENNQKVPID LRIDDYIKFS PFSNESCEFT YQNAKYTFVK ARYVMAKY
	PF11_0175 / PF3D7_1116800	heat shock protein 101, putative	MTRRYLKYYI FVTLLFFVQV INNVLCAPDN KQEQGKYLNR TINILNAGKN IAKSYGHNKL KPIHILSALA KSDYGSTLFK ENNVNAANLK EYIDIALEQT RAGAPLDNKS KIVNSAEVKE TLALAEAAAN KYKSPKVDVE HLLSGLSNDE LVNEIFNEVY LTDEAIKAIL KRKFEKTKKD KDGKTGTLYI EQFGSNMNEK VRNGKLQGIY GRDEEIRAII ESLLRYNKNS PVLVGNPGTG KTTIVEGLVY RIEKGDVPKE LQGYTVISLN FRKFTSGTSY RGEFETRMKN IIKELKNKKN KIILFVDEIH LLLGAGKAEG GTDAANLLKP VLSKGEIKLI GATTIAEYRK FIESCSAFER RFE…
	PF11_0099 / PF3D7_1108700	heat shock protein DnaJ homologue Pfj2	MNVTNVVKRR KKLSYFHSLL LIIFSFFLSC ARGMDYYKRL GVKRNATKED ISKAYRQLAK EYHPDIAPDK EKDFIEIANA YETLSDPEKR KMYDMYGEDY AQGGMGGGSP GRGEHAHGFH FDQDVVNEIF KQFAGGGGAG ASGGRAGNFH FKFTSGGPSF NHFEDEYEDI YKNEVLKINS KNIESVLNDI SFSLIINFYS PTCSHCISFK KKYLKLRKKF DGYITFAVVN CQEENMLCRK YNVKSLPQLI LMRSDKTYET FYGNRTDENL TYFIKNNIPS AIIECNNQKK LDNFLTQNIE IPKVLFFISH NDNIVMLKAL SLEFKKRINI GIIYNTNYSV MKLFKKKNIK TPSLLLVDDI DSL…
	PFB0920w / PF3D7_0220100	DnaJ protein, putative	MKYFKKFKYF LPKYILTNDD ENKNKYASHK IYNLNNKYGN FLKLIICLPF ILITVLWIFL TISIFNVCTY DPTLACIVPL DSIYLRSLCE SVRSKNSNDT IKEPVLKNKV FSLPNEKKLT KSEDICDNNV NCIFKFNEKL INDLEKYKVS NENDVMAYVK SYSVYNNNNN NKKDDILDTK IHNIGKNGED IIKTMEILWL EFMENEKEKY YLLKGRLYKY NNKFKMENKY TDEYFPRKKW NNYNDLIYKG SKDLEEKLNK MFYEWYKQEN LNLEEYRRLT VLCRTGWKAL YNYVENICKE IIHSDLDIIK NKKGSNMKKG LYNNEYKNNG KNIPFNTSSS IDNKKLYNSF GKFENPMCFN YED…
	PF14_0417 / PF3D7_1443900	heat shock protein 90, putative	MQNVYVGNKI KFIILYFFCV LFLKDYERSE AFNLARTTEK LNYILNYKTP NRYDLNNNVN KLFFEKQKKK IEFSRKPLNS FNEDVKTIRE DISSDSSPVE KYNFKAEVNK VMDIIVNSLY TDKDVFLREL ISNASDACDK KRIILENNKL IKDAEVVTNE EIKNETEKEK TENVNESTDK KENVEEEKND IKKLIIKIKP DKEKKTLTIT DNGIGMDKSE LINNLGTIAQ SGTAKFLKQI EEGKADSNLI GQFGVGFYSS FLVSNRVEVY TKKEDQIYRW SSDLKGSFSV NEIKKYDQEY DDIKGSGTKI ILHLKEECDE YLEDYKLKEL IKKYSEFIKF PIEIWSEKID YERVPDDSVS LKD…
	PFL2015w / PF3D7_1241900	Tetratricopeptide repeat protein, putative	MQNVYVGNKI KFIILYFFCV LFLKDYERSE AFNLARTTEK LNYILNYKTP NRYDLNNNVN KLFFEKQKKK IEFSRKPLNS FNEDVKTIRE DISSDSSPVE KYNFKAEVNK VMDIIVNSLY TDKDVFLREL ISNASDACDK KRIILENNKL IKDAEVVTNE EIKNETEKEK TENVNESTDK KENVEEEKND IKKLIIKIKP DKEKKTLTIT DNGIGMDKSE LINNLGTIAQ SGTAKFLKQI EEGKADSNLI GQFGVGFYSS FLVSNRVEVY TKKEDQIYRW SSDLKGSFSV NEIKKYDQEY DDIKGSGTKI ILHLKEECDE YLEDYKLKEL IKKYSEFIKF PIEIWSEKID YERVPDDSVS LKD…
Fe-S CLUSTER PRODUCTION
	PF07_0068 / PF3D7_0716600	cysteine desulfurase, putative	MLRGPRCLYI YLFFVFLPFS FCYIRNNDNR FVYIVKSIRK GPNIKLRLTK DEKPNIDNHI IDYFKNVREH FPFFKENKSL IYFDSAATTH KPSCVIEKMS EFYKKENSNI HRGIYKLSHN ATNNYEKVRE TIKEYINCEK NDNIIFTNGS TYGLNVVCKM MIEEIIKKEE DEIYLSYMEH HSNIIPWQEY INKEKKGRIK YVPLNKSGYI NIKKLISNMN INTKVISICH ASNVIGNIQN IEKIIKKIKN VYPHIIIIID ASQSFAHIKY DIKKMKKNKS CPDILITSGH KFCASLGTGF IFINKELSSK YKFKPLLYGS NIITNVSKYK SKFVTSLSEL LETGTQNIPG ILSMGISLEF FKK…
	MAL7P1.150 / PF3D7_0727200	cysteine desulfurase, putative	MKFLQIIKHL KLQNKKNALD NFVNCRTYEH ISNINKLFLN NFSSTKEHSE HGQVKHENFL NSTLKYEENS QNGSTNNLKN GKYNMYVSEG NVNINEEKYK DNNISSNNTQ YNNNSSNSGS LNDEGPLWKE HIDDVVNENK KKKMNRFYLD SQATTMIDPR VLDKMLPYMT YIYGNAHSRN HFFGWESEKA VEDARTNLLN LINGKNNKEI IFTSGATESN NLALIGICTY YNKLNKQKNH IITSQIEHKC ILQTCRFLQT KGFEVTYLKP DTNGLVKLDD IKNSIKDNTI MASFIFVNNE IGVIQDIENI GNLCKEKNIL FHTDASQAAG KVPIDVQKMN IDLMSMSGHK LYGPKGIGAL YIK…
	PFI1050c / PF3D7_0921400	Fe-S-cluster redox enzyme, putative	MNCIFLSVLF IWYFFFVYVK NLSILQYDKA KVLFIQNNFE PLNNNMLRVP LNILRKRTYV VKNKKNGVPF QIFLSSENDE GLYYELNPEN VEKVLNLIRP KLQIDNGDVE LVDIKNNDLY IRLLGNCVTC SSNSITVSHV IKKTLKMYIR NEQNQEPNVI ITNFDEINEQ NIQNCLSQLK PYLDFLKVEV IIKELVNNKE NINNYVCLKF LNIENSSEEI NIPHNVKNEI TERLKQKFPT LTVNFEN
	PF11_0044 / PF3D7_1103400	iron-sulfur assembly protein, sufD, putative	MPNIFLSNYI FIFILLTNKF LKTFDYVESK HWNNICLKDL YDKNDIKLNK TNKLKLKYKN FMFSDLKKQK KRKETETATG TITQKQKHTK KKKLHGQTNG YFIKRNKIQH IFANIPYNNN FKKINQDIYT FKNVNYHPKN ANKKVYLKIN NATHLETIKT YITKCIKNYR HQNEEKTQKK IRNYNNIIQY YVSRKNNNNN NNNRFIHTYN MLFINIFYNI ISKNRNEKKK KNRKTDFQKY LRKYEELYQK FTPENDAENN DINNDKNNSD LISQINKKNI SNIIINEWCL RNNNEKYNST LMYDYISNMH NTEYQDITCV NNFIKNNEMI EKETWEHKQK PYLTYKYEFK YRDPINRKNK LYQ…
	PF14_0133 / PF3D7_1413500	FeS assembly ATPase SufC	MKRRKWLNIT WAVTIYIFFG MINVSSYNEG RKRKNKMYSF VINGYNEYKN KYSFLRKPKN VVHMENNNFD MDRLSLLKNL EEESKIITEG EGWDKTHPLL EIKDLHAIEI EGEKEILKGI NLEIYLGEKH TIMGRNGSGK STLAKVIAGH PYYKITKGII KYKGLDLINL PVNVRSLCGI FLAFQYPVEL PMVKNNEFLR AALNSHRRHR NEEEISVSEF NLMMIEEIKK VGLSSEFLDR PVNYGFSGGE KKRNEILQML ILKPTFCILD ETDSGLDVDS FKLTSNVITN FSNDNNSFLI VTHYKKLLEL LKPNFIHIMH QGKIIESGDF SLVDKIENKG YSQFLKE
	PFB0270w / PF3D7_0206100	iron-sulfur assembly protein, putative	MNKKKLKAHF FVLYIICSCF ILILSIKHDK YNNESKKKKK FFKIRTKIIF YKLKKVNQIK NAPQLYIQFY KPKCHKTTQS LKDIFNELSG NKNPENPKNI DEYNLTPKLK KTVELFQSMP NSPYYKSQQV ILMGKKISSM PDKHKIRQNQ VLGCQSVVYI YPKVEENEDK KKVIVWLGHS DGLLTKGIVY ILTDGLSGYM PEDILKVNPN FITLTGISEF LTMSRINGYL NIMNKIKIFC TNILKNMDN
	MAL13P1.95 / PF3D7_1318100	ferredoxin	MNIVILLLIL TFSIKHSNTY KLKNTYIPIN YMYHNNKNIL RSQKSKLFLN FLSNNQLANS NKQTCFFKSN IKSSISNIDN YDYIRKRYIN TSNKNKLFYN ITLRTNDGEK KIECNEDEYI LDASERQNVE LPYSCRGGSC STCAAKLVEG EVDNDDQSYL DEEQIKKKYI LLCTCYPKSD CVIETHKEDE LHDM
	PFF1115w / PF3D7_0623200	ferredoxin-NADP reductase, putative	MKIRFVFILS VLISGVCCIS KNVSRRVANR MTAHSRFLFV HDKYKRNKNF KLKNNKEENN FINLYTVKNP LKCKIVDKIN LVRPNSPNEV YHLEINHNGL FKYLEGHTCG IIPYYNELDN NPNNQINKDH NIINTTNHTN HNNIALSHIK KQRCARLYSI SSSNNMENLS VAIKIHKYEQ TENAPNITNY GYCSGFIKNL KINDDIYLTG AHGYFNLPND AIQKNTNFIF IATGTGISPY ISFLKKLFAY DKNNLYNRNS NYTGYITIYY GVYNEDSILY LNELEYFQKM YPNNINIHYV FSYKQNSDAT SFYVQDEIYK RKTEFLNLFN NYKCELYICG HKSIRYKVMD ILKSHDQFDE KKK…
	PFI1050c / PF3D7_0921400	Fe-S-cluster redox enzyme, putative	MNCIFLSVLF IWYFFFVYVK NLSILQYDKA KVLFIQNNFE PLNNNMLRVP LNILRKRTYV VKNKKNGVPF QIFLSSENDE GLYYELNPEN VEKVLNLIRP KLQIDNGDVE LVDIKNNDLY IRLLGNCVTC SSNSITVSHV IKKTLKMYIR NEQNQEPNVI ITNFDEINEQ NIQNCLSQLK PYLDFLKVEV IIKELVNNKE NINNYVCLKF LNIENSSEEI NIPHNVKNEI TERLKQKFPT LTVNFEN
PORPHYRIN BIOSYNTHESIS
	PF14_0381 / PF3D7_1440300	delta-aminolevulinic acid dehydratase	MLKSDVVLLL YILIINLICC LNGNSKKRAY ILNTPKSSNC KRSSFRRWNN PVNNNNSQIL SKNEGSIEDV YNKKISGRCN IKNFSKDINN NIYIETNRRE RRIKRNKYLL SLYNNTNIKT SNFIYPLFIH EEDVEKKHTQ LEGIYTYNVD GIIKEIEECI KLNIHHFMFF PVIREENKTV YCEESYNENS YFCKTISRIK EKFSDDIIVY TDVALDPYNI YGHDGIYDDN KKEILNDITV HTLVKQSLCL AKSGADVVCP SDSMDKRIEL IRKNLDFHNF RDILILSYTC KYSSSMYKPF RSILNSNILK NFVKNKQSYQ HDFNSYMDLN NVDKHIIEGA DIIMVKPSMF YLDIIHKIKN RIK…
	PFL0480w / PF3D7_1209600	porphobilinogen deaminase	MHLLSFLSFI IWFIHCTAKR HEYSIKKYFL NSHNFCKIKP DPFRKDTLKK RLYSSDGIKD EIIIGTRDSP LALKQSEKVR KKIMSYFKKM NKNINVTFKY IKTTGDNILD SKSVGLYGGK GIFTKELDEQ LINGNVDLCV HSLKDVPILL PNNIELSCFL KRDTINDAFL SIKYKSINDM NTVKSVSKTE DIHHINKKDS DHNNDTLCTI GTSSLRRRSQ IKNRYKNIYV NNIRGNINTR IEKLYNGEVD ALIIAMCGIE RLIKKANLKH LLKNKEQKNI CQPFLLKCNN KKCIDLCHVN IQKLNKNLIY PALGQGIIAV TSHKKNYFIS SLLKNINNKK SEMMAQIERS FLYHIDGNCM MPI…
	PFF0360w / PF3D7_0607300	uroporphyrinogen decarboxylase	MLKCLVTPLL ICILTIKILC FINLKKLRFN IIKTETILNM NEVGEIYSRP ENLKYEKFGR PQNDLILNVI ENKNEEKKFK KIPLWIMRQA GRYLPEYVEI RKKYDFFEIC KSPDLSSYVS IMPYDRFKTD MIVIFSDILI IFVAMGIDIK FVENLGPVFN LEIYNMNDFN KLNLNMKEII DNLYYVYDSI NLTKKKINND VPILGFCGSP FTLFMYLTKN NKKTYEDSFK FLYEKPNDAH QIINKLSDIC LNHLINQIDS GANIIQIFDS NAELVDKNIF NEFSIIYLKK VIEIIKKYRP NIYIILFIKN NFHDDIKNLK IDVLSITHKQ LIDNTDQFYF KLFQNNIILQ GALDPYILLL NDH…
	PF14_0155 / PF3D7_1415700	serine C-palmitoyltransferase, putative	MHLKGLMDYN YFLGLEVLQN FDIVNYLIAG IVLLALILAV FNEDASAGSP RLSWVLGEFL PIQHSIFALN SNVEKKLFRK RSSKIYTFIT CLYNLFVELR NSITEGNFIM LVKGWFLKVL NKIILYKNLL LLKYRSQSKR HLFYMLVKKK YNLPIQKEEN EMQSYLDAKR ELIRLNRWSF MWRVSNVKNE FLLCEKRKAR PISSYSYLDF IREPLVQNNA IQAAMEWSTG NHGPRMLGGN SQILRDLEKV VGNFFGRNDS ILAVCGFLAC MSGIVAVATH EDIILYDSRT HACVKMGIQI CGAKAYSFKH NDYNHLEVLL IKYRYKYRNC WVCIESVYSM DGDIPHLPTF KKLCIQHKAK LYV…
PT MODIFICATION AND PROTEOLYSIS
	MAL13P1.255 / PF3D7_1350700	N6-adenine-specific methylase, putative	MIFVKHIFLL YIISLFLNNL NTLCNSLKSP KKKHIGLLYK LSKRNNNKNV AIKKKLFVFP LCFIKVYPFI FKNKVAFQNV EDNYVYTLKR MERNKWRMQD ERKVIQNEQN VCNNTNKGFS DLDGNSLDAA RYSKNIVENM NHTGYKKDSD HNNENINKKD SNHNNENINK KDSDHNNENI NKKDSDHNNE NINKKDSDHN NENINKKDSD HNNDTINKKY SDHNNDSINK KYSDHNNDSI NKKDSDNNND TINKKDSDHN NDNINKKDND HNNNINACNN NGKVSSKGKK RIIETDMYGL PKEKLNIKRQ TNKNIKSKYG YCKIKTYNET INVNYRKKKI LSILEGTLKN KRLYSPDTYT RPM…
	PF13_0133 / PF3D7_1323500	plasmepsin V	MNNYFLRKEN FFILFCFVFV SIFFVSNVTI IKCNNVENKI DNVGKKIENV GKKIGDMENK NDNVENKNDN VGNKNDNVKN ASSDLYKYKL YGDIDEYAYY FLDIDIGKPS QRISLILDTG SSSLSFPCNG CKDCGIHMEK PYNLNYSKTS SILYCNKSNC PYGLKCVGNK CEYLQSYCEG SQIYGFYFSD IVTLPSYNNK NKISFEKLMG CHMHEESLFL HQQATGVLGF SLTKPNGVPT FVDLLFKHTP SLKPIYSICV SEHGGELIIG GYEPDYFLSN QKEKQKMDKS DNNSSNKGNV SIKLKNNDKN DDEENNSKDV IVSNNVEDIV WQAITRKYYY YIKIYGLDLY GTNIMDKKEL DML…
	PF14_0348 / PF3D7_1436800	ATP-dependent Clp protease proteolytic subunit, putative	MQGLLLFMLI CINFCKCTKI ITRYNFITNK INIKRYKKKN NNKSPLYYSY NEHHKYNINI PSLLLSKRII FLSSPIYPHI SEQIISQLLY LEYESKRKPI HLYINSTGDI DNNKIINLNG ITDVISIVDV INYISSDVYT YCLGKAYGIA CILASSGKKG YRFSLKNSSF CLNQSYSIIP FNQATNIEIQ NKEIMNTKKK VIEIISKNTE KDTNVISNVL ERDKYFNADE AVDFKLIDHI LEKE
	PFC0310c / PF3D7_0307400	ATP-dependent Clp protease proteolytic subunit	MIYLFLFLFL ILLKNKKIQT KKSIKNSNIL TFIPLSKKNE IVKENIGKLL TYNLQYDQGY TNYNKKVRKI NVHNSSSEFA NNINLDIEKQ NNERAILKKE DLNFQIKNDC ISKDNINKKK IKNMHNKDQG MIQHTNTNDN IDYTNSNYNN YLNYDVKKKK NKKRKYSKVQ QQIITNNDDI KDMKKDVKLF FFKKRIIYLT DEINKKTADE LISQLLYLDN INHNDIKIYI NSPGGSINEG LAILDIFNYI KSDIQTISFG LVASMASVIL ASGKKGKRKS LPNCRIMIHQ PLGNAFGHPQ DIEIQTKEIL YLKKLLYHYL SSFTNQTVET IEKDSDRDYY MNALEAKQYG IIDEVIETKL PHP…
	PFC0310c / PF3D7_0307400	ATP-dependent Clp protease proteolytic subunit	MIYLFLFLFL ILLKNKKIQT KKSIKNSNIL TFIPLSKKNE IVKENIGKLL TYNLQYDQGY TNYNKKVRKI NVHNSSSEFA NNINLDIEKQ NNERAILKKE DLNFQIKNDC ISKDNINKKK IKNMHNKDQG MIQHTNTNDN IDYTNSNYNN YLNYDVKKKK NKKRKYSKVQ QQIITNNDDI KDMKKDVKLF FFKKRIIYLT DEINKKTADE LISQLLYLDN INHNDIKIYI NSPGGSINEG LAILDIFNYI KSDIQTISFG LVASMASVIL ASGKKGKRKS LPNCRIMIHQ PLGNAFGHPQ DIEIQTKEIL YLKKLLYHYL SSFTNQTVET IEKDSDRDYY MNALEAKQYG IIDEVIETKL PHP…
	MAL13P1.111 / PF3D7_1320100	ATP-dependent Clp protease adaptor protein ClpS, putative	MFKDLKPFFL CIILLLLLIY KCTHSYNIKN KNCPLNFMNS CVRINNVNKN TNISFPKELQ KRPSLVYSQK NFNLEKIKKL RNVIKEIKKD NIKEADEHEK KEREKETSAW KVILYNDDIH NFTYVTDVIV KVVGQISKAK AHTITVEAHS TGQALILSTW KSKAEKYCQE LQQNGLTVSI IHESQLKDKQ KK
	PF08_0063 / PF3D7_0816600	ClpB protein, putative	MVNSFFFCFV IIGLIYVWDI TYSKKAKIFF NKNDIFSIKN THWDIYDKKK YFFIGNNHLK NEESFLPEVR KDYKSQIKEY KNSTNGIIYH NNKNRLSYTI NDQVNYDNNM TSGINKKRKV KDSSIHMNNS YEKNRNKNKF ALFMSDEEYT INSDDYTEKA WEAISSLNKI GEKYDSAYVE AEMLLLALLN DSPDGLAERI LKESGIDTQL LVQEIDDYLK KQPKMPSGFG EQKILGRTLQ TVLSTSKRLK KEFNDEYISI EHLLLSIISE DSKFTRPWLL KYNVNYEKVK KAVEKIRGKK KVTSKTPEMT YQALEKYSRD LTALARAGKL DPVIGRDNEI RRAIQILSRR TKNNPILLGD PGV…
	PFL1780w / PF3D7_1236800	Protein-S-isoprenylcysteine O-methyltransferase, putative	MNVKKYMICS FLLYILVLYY EILIFLINKN VYEILEKKNV YKVCNSYIHA FLKYGFVLFY IIVSFLPQRN VYKKRSKLNY IFAKLLLLYF IFFFIHFVIN LFNNFPLNLF YLIIISFHLS EFFLSFLHNK ENANYYNFLV NPNSVYVYFF ILTLFEYYLK IFFFVFLNVY QKYINNQKIL HKVLLINYFF LRNYIEKDKI CTYTYTNQIL IGTSIKVQKN ILPNLNTIQN VYEYDKNSNI IYNSFSSKKY LSKKSPYLLS RPYNQYTQKV KQKYKSLKFI NTLTYTQIKE QTNNNQYRNV NNTKDNLIIN YDNLNNEGQC IFNYTNLTNI LEKYTGKKFY KNFDLNNSFL YEIISKHKHV FHT…
	PF14_0439 / PF3D7_1446200	M17 leucyl aminopeptidase	MYFSSLCKFL PISEKEKIYL NIVKKRFCKS NIYYNNNNNN IINYNKRGLK FYPFCNNLKK NINFVNINNK KGINFHSINK ERKMASEVPQ VVSLDPTSIP IEYNTPIHDI KVQVYDIKGG CNVEEGLTIF LVNNPGKENG PVKISSKVND KNVSEFLKDE NMEKFNVKLG TSKHFYMFND NKNSVAVGYV GCGSVADLSE ADMKRVVLSL VTMLHDNKLS KLTVVFEINV DKNLFRFFLE TLFYEYMTDE RFKSTDKNVN MEYIKHLGVY INNADTYKEE VEKARVYYFG TYYASQLIAA PSNYCNPVSL SNAAVELAQK LNLEYKILGV KELEELKMGA YLSVGKGSMY PNKFIHLTYK SKG…
	MAL13P1.56 / PF3D7_1311800	M1-family alanyl aminopeptidase	MKLTKGCAYK YIIFTVLILA NILYDNKKRC MIKKNLRISS CGIISRLLKS NSNYNSFNKN YNFTSAISEL QFSNFWNLDI LQKDIFSNIH NNKNKPQSYI IHKRLMSEKG DNNNNNHQNN NGNDNKKRLG SVVNNEENTC SDKRMKPFEE GHGITQVDKM NNNSDHLQQN GVMNLNSNNV ENNNNNNSVV VKKNEPKIHY RKDYKPSGFI INNVTLNINI HDNETIVRSV LDMDISKHNV GEDLVFDGVG LKINEISINN KKLVEGEEYT YDNEFLTIFS KFVPKSKFAF SSEVIIHPET NYALTGLYKS KNIIVSQCEA TGFRRITFFI DRPDMMAKYD VTVTADKEKY PVLLSNGDKV NEF…
	PF14_0382 / PF3D7_1440200	stromal-processing peptidase, putative	MLKSDVVLLL YILIINLICC LNGNSKKRAY ILNTPKSSNC KRSSFRRWNN PVNNNINELK EDEDLIKYEL QNGLSNIIYK KRKSVNKKKY ILNNENHVIL PTYKISDEYK CYINPIDYNY EELHVYMEVN TGSVNEKKNQ QGISHLCEHV SYMGSKNRKN IVDKNIRTNA YTDFHHIVFY ISVSLNNEIY KENFYSDFKC DQFIKNIREE DIEDYDIYTV DEFNYKHAIL SQCIDTMVEV LKGETQFNKE RITKEKKAIF SEYSIINNIE YKMNSDIIKV LHKENRLSHR LPIGKLELLK RYGEKDVKEY FNLFFRPENV NFFVYGDVNV DIAQKLISSK LENIKGKDLK EQDKIYLNIL NDR…
	MAL8P1.140 / PF3D7_0804400	methionine aminopeptidase 1c, putative	MNISIFFFLF LYSGSICAIH LWRHSEWRGR NVLGGGKCRN NDNMLWLDLI KKNKKVNKKK NKNNNNNIIS SSCCCCCCCC IYNDKYCFLF VNKKIDNNYK RIKKKEKHNC KKRLKSLNNE GGFSNTYHND VKKNTLDYCE ERLPSYHRYI DNLKTRKIIH PSIRIRNLDK KFMKCKESYN KLYSHLKEND LFENFSYVGR QKKGILSPTY RLPKYIERPN YHKTGIPIYV PYDKEKKNNK TNSDHNNKYD HYNCNYDYNY YDNIKSDKDI QIIKENCKFA RELMDDVSYI ICEGITTNDI DIYILNKCIN NGFYPSPLNY HNFPKSSCIS INEILCHGIP DNNLLYLNDV VKIDISLFRN GYH…
	PF14_0517 / PF3D7_1454400	aminopeptidase p	MQLNFLLFVF IFLMVFHLNI FNKGKRQNLV SAYLNHFKKS YFSGVTSGSD CVNKSEVSSD NNNNNNNNNN KIAHNFFSKK YQRNFENNNL SENQENNKNI IYSGSNIFKN IYNTEMMSNN NTVDVNMMDN NPAARLEELR TIMKKNKIDV YILINSDEHN SEIINEKDKK IVKITNYSGA DGILIVTKDK PILYVNALYE LQAMNELDQN LFTLRISRID NRDEIFETIS SLEFNTIAFD GKNTSVVFYE KLRKALLNAY PKKKIVEKII YNNNFDDVNK KDDENVLNFL VLEKSLVEIK DYPVNNKTLY IHDRKYNGAC AGEKIDKLKQ SLMYDIKNVD NLLLSELDEI AYLLNLRGYD YQY…
	PFD0230c / PF3D7_0404700	dipeptidyl peptidase 3	MILIFQLFLI NILFLNFIKC DIPVHCLSRH VEGKWEIHLG LLKKKKNSKQ KNVEGVILND KVTGGNVWNI SGDIKKNETT AYDNNYDNNY DYQCGYKRPD NADYHDDLNP ENEDTKERFE EKEKRYIVFN EDRSLNILNE EGDINSRYSG YWKIIYDEGL YIEVYKEDDS KEVYFSFFKF KQKGDVSYSY CNNLIMGVMN KYSLDNNIWD MRYEENIEEN IRSDDKNNNI HMIKDEKKSV LNIDEKNREI SNNISHIYMI RKNVTFFGLR NNKIKKPKRK KMKDKIIISK GNNNINEIQN DDNYNKIIKE KNFFQLIDYY NDNYISSGRF NIDKFCWYGK KVQEHSEQPT NKIPVQNISP LSV…
	PFI0660c / PF3D7_0913500	protease, putative	MIIKFFFFSI LFLLYANCYN TIKKIRIVKN YVKIINKNKS DWCIRKYKKI YNYNKIKVNL SSEYNSVNNK TNEQNNISKH IKELYIKNYI KIKNSFIHIK NILKNIKENL FQVTLKKQII ISVAFFFLHF YLLSEHFLIL FPYQLIPNHS NILMSLDINN TLFLLTTLYF LKDIKTNFQT FRNKLKLNRF VLELQENKRK NILSISVLLI ASYILSGYAS IYTEKVLSIL KLANITFNEN IIKSLQILAG HFIWVFCSYL TFRNLLYPYF KNNKSNLNFR YTDRWCFKVI YGYLFSHFIF NIVDIFNNFI LNYFTSDDIY SDNSIDEIVH EKEFFSTFLC IISPCFSAPF FEEFIYRFFV LKS…
	PF11_0174 / PF3D7_1116700	cathepsin C, homolog,dipeptidyl peptidase 1	MAKRIFSVSF LLVLLNVLHI CIKFSVADLP THVETKNLLG KWKILRTKTS PNLTTCGSSQ PNKNTYNVGI TDYKKYLLEN NYEFVSELNV ILSDDYVLYG DIYNTQDNEH RSKWKVLAVY DENKRVIGTW TTICDEGFEI KIGNETYAAL MHYEPNGKCG PVSDEDSLDS NGDTDCYTTS FSKIRYGWLD VENEKNEHLH GCFYAERIFD NVNEIKHLDS FTIDKDSQNV LQTFTYDTKL NNILNSNNML YKFGNLQKPT FTKRNNTNVQ FNSELNWHRM KHHGKKKPLK KSMLDASRQT YACPCNANEV VDNVINKGDS DNPVSPTLIQ LNNNLKNTTQ TGNKDTNEMD LENYEDTLNS PKR…
	PF11_0464 / PF3D7_1145200	serine/threonine protein kinase, putative	MDYSNNKKNV KAMNQHQNKD SSEYNENYYK RQYNIKNRKN EEIKVGSNLS TNNDVLQLPS VLHNHIRIVR TNDSCFKDYI VLSNLGKGTY AQVWKVKHKI TNEIYAAKLL QPNQFPKESF NRIVEMFTKE IINLSICQCP GVIKLHKVIG GKEGWILIQD FANDGTLWKE NLSSNMNEAF LYFIQLLQGM WYIQEMNIVH RDLKPTNILR YDNKRIVIAD FGWSEHIDSC NLHPTEWPGT LEINPPEVLR NTGPMTEKID NYALGMNMIL FISGRFVCRQ KGIECSKVAQ TILKTVHNLR HSKPPSRFRE NLKAWDLFVK LTSSNPIERL SLQNVLDHPW VTEMLNNFSL QNSKFLWHEK VKS…
	PF14_0660 / PF3D7_1469200	protein phosphatase, putative	MNVDKILWLT IITFLVNIFK TLCLSKNKYL FKYLIVDRKK LDPSYTYKYD NIQWNHKIIA IGDIHGDVES LKLILRHSNL IDENDEWIAE DVMLVQVGDI LDRGVFGTYI YDYLLKLQKD AIKKNSKVIL IMGNHEQLNL CGAFHYVNES EVMLFFQNNR NNRLFSFTNK NGYYFKKLIR LPVIVKINNI IFTHGGISKH MSEYDINTIN LKTRLQIENK CKMFQFEKYN YLSKEGVLWN NEISHQVKLQ PKKTCKHLRN ILKKYNAKGL VVGHTRQKSH EIQTYCNNSF FLIDTGMSLF MNNGQPYPNY LQIEKGKFKT VHLIVQEYNR KKTCQGKQIQ LSKPYKKMIC LSHKIKDL
	PF14_0524 / PF3D7_1455100	protein phosphatase, putative	MIQIIPYLYL GKKNDIDNVE NLKKNNIKAV VICCTYFEYP EYKIPNGYEI LRINLEDIGL ENISSYFEES NNFIHSYITK EQSVLICCCH GISRSSTISI AYLIGKQNFG LNEAFNFIMG KKNICPNIGF MEQLCEYEKR LKNQITFSSV KYISWFTSER CDKNVSTDFS L
	MAL7P1.92 / PF3D7_0718300	cysteine repeat modular protein 2	MRNSDFFFFF FVLLNCFLNI QPYVSNATSN IIKEKNTSFV KKIYDDPYIK KDVTLQLKNA KYNHINKKIS KSKKNVKKKR GISFVSLNLN KILELQDKNP IKLISNIYAK DKSKFLSTCY ENNKLNDINN CNRFTISKQI CDTPVGFNLN DNFLVKETGG LSSTCLVDNK PEYWKIYNNH IIVESGEYFD LKIRNETFLL QTSIIITKDI CMNKTKIESS YFTYQNNHSK IGNPILYKGE VIGMEIKNIK VKDDVEGLFN VCSCYLDNEH HAYNKCSETN KHYMQISSIR IIKKIVHNIN ILTGKKLHIN LQNYVTPYPI KSAFIIKKVE HYSCNNINNK SFNEIQEHFY NNEKKLKFYN IFL…
	PF10_0245 / PF3D7_1025100	glucosamine-fructose-6-phosphate aminotransferase, putative	MNFKFKTVIH NLKSKFKHEF VSDKKQLYFC NIMKNKYNVY ENIGFLNYGC SIKKYLFYNR KEDQDEEFKG SFKNGTMNGL KIWKYNNISS QKDTYNNISS QKDTYNNISS HKNTYNNISS HKNTYNNVSS HKNTYNNISS HKDTYNKYYY ALFNNNIFNQ KKLYIFFMAI CLALNKFLNT QEENNENNNS LKKKKKKKIM NSHFFGLSNE TASCCGIMAY MGNRDASKIL IDGIEILQNR GYDSCGMSTI SNKNVLKTTK YASNTTCDAI EKLKSNYLNS HKNDHIGIAH TRWATHGCKT DENAHPHVDY GERISIVHNG IIENYREIKT FLLKNNIPFK SNTDTEVVAN LIGYFLDKKQ SFQ…
	PF14_0286 / PF3D7_1430700	NADP-specific glutamate dehydrogenase	MILYSCVVCF IVFVFHVKAY SKNKVLKYAK PGFITNEIDI GAYAKRRGKS RLGSLHNYGY TSTKSVDNQI EELREKVVSK NKNEPEFLQA FEEVLSCLKP VFKKDNVYIG VLENIAEPER VIQFRVPWIN DKGEHKMNRG FRVQYNSVLG PYKGGLRFHP TVNLSVIKFL GFEQIFKNSL TTLPMGGGKG GSDFDPKGKS ENEILKFCQS FMTNLFRYIG PNTDVPAGDI GVGGREIGYL FGQYKKLKNS FEGVLTGKNI KWGGSNIRAE ATGYGVVYFA ENVLKDLNDN LENKKCLVSG SGNVAQYLVE KLIEKGAIVL TMSDSNGYIL EPNGFTKEQL NYIMDIKNNQ RLRLKEYLKY SKT…
	PFL0835w / PF3D7_1217300	GTP-binding protein, putative	MNYNKISLYI IIFCFSLSFF HTFIVIKKFN IYSKQLFPQT YNTYTHNISK KKKKKCTYNI NYYYCSSLPY LEDFNIARDK KSAFAIYMNH KNDQINEQIN NDVSNITNVD HIRENQDHNI FTDCNKMIEP KKKKKKKNIK MNKIRIKVMK ENKMKNKKLM KNKNTFNINQ HSTSNGNNMM KEEGKKEQKK KYDEKDDDDE KDDDDDEKDD DDDEKDDDDD EKDDDDDEKD DDDDEKDDDD DEKDDDDDEK DDDDDEKDDD DDEKDDDDDE KDDDDDEKDD DDDDEKDDDD DDEKGYDNDY DNHNDYHNDN YYGQNEFIQI SSNKDYKQTL ISNSQEINHN YIYDKEKRSS KTYIPNNIIQ NNS…
	PF14_0114 / PF3D7_1411600	GTP-binding protein, putative	MISFIFFIFT IYYESIVGSV LFSRWRVGKR IMFLNNMKGT KFKRRKRENS RSTLYSMQKM IKKNEFHDRC VIKVKAGNGG DGICCFTVFS QKKNKKYASG GRGGNGGDIY VIGNKKIDNF LNVKLKSFYN AENGGKGLNN NQVGYNGKDE YIYVPINTII YNEQKEFINF IYMNNQKVLI AKGGKGGKGN YSYRTKSLKI PFVCQYGEKT KEKKIYLKKI LFTDLGIIGY PNVGKSTLLN KITKANVKIA NYSYTSKFPN VGMFKRVEDD SDIRKDNEFI SFDGTPSEET IPEIGYSEED TMVEKYNKDD KLENMNNEND SLLNNNNDNN NDNNNDNYDN NNDNNNDNYD NNNNNNNNNN NNN…
	PFC0330w / PF3D7_0307800	PDZ domain protein, putative	MYLLMSKFLV WIIIFGNFFV VHFFLCFKIP NNKITNVLTY DNSKKQRINS KHNTFLYKND TLNKLLNRKK NKHTLFYRSK KEKDIQESGY LYPFDHLEKK KTKFPPDPYI PSEDEKESSI DIFHDKINDD DLMIYEDDDD AKKYFGKTTF NKPNIIQKDE NSEDDQDDDL NDQNDDPINN PTNNLTDNPT NNSTDNPTNN SIDNPTNNSI DNPTNNSIDN PTNNSIDNPT NNSIDNPTNN SIDNPTNNST DNPINSPNYQ QVTQSNIILE EENNTNKTDI EKDIININFY SSEEKKIACE MIKDQIYYLL HSSMDKTFIE TFNINIESHI VPSEKRICVS YNMKSHTFKR SISNLSDLIE FSN…
	MAL13P1.196 / PF3D7_1338900	Serine/threonine protein kinase, putative	MKLSSCITYV SILCNLIIVG RFLYSSFLFL FSENILNYFE RNNPFIHRKK YLIHKRTQPI LHSSKYRHPY EGSFKKKVIY DNNYFGIRKE INLVHYNKFS FYEYLFLLLF YKKGIHKIFD YVYVYYYKTN IFDSLYNYNN EYVKNNLLFA FAKDIKKYFL IFNSNIKKLD VQLAILIKKK RRKKKKRIYE QKHLASYSSK LERTTNGNKY INTYDGNEEE NIFVHEEINT AYGNYEGKPV LNSKYCLIKK IKNILKKKTL RKSNINKLDV IHLPIDDESV ENKNNVELNN YVCKSCIIDI EEKSLYALKI REEEKEKDSN NISLYKEKSR HIQIYYDYED MQEYIMKKKK KNEKNEKNEK KKK…
	PF13_0344 / PF3D7_1365400	ubiquitin-activating enzyme	MYQVVKEYLN NYQRYIYYGV FIVVGYFLHD LINYAQREGV RIGRIRKIFD LFSKVLKKVY IFFNFYERRI ITLENELFYK NYDKEVIDRH GKLLNIYDIP HDSLYKIFNT KILIIGLGGL GSPVCLYLSK FGFKEIGLVD GDKVEKSNLH RQIIHKEKYI GLNKCISAKL FLKDMDVHVS DCIKCYPFFL DKLNGINIIK EYDIIIDCTD NISTRFLIND LCILYKKKLI FASALGIYGQ VNVYNLNNNT SSCYRCLKSF NNHSQNNDCD ENGILSTVTG VIGLLQANEV IKLSIGLDQD VLTNFLTYNS FSNKLPFESL NINYKNKNCL CSMKNFKELY NFILSHNYDN INNTNNTNNT NNT…
	PFA0555c / PF3D7_0111500	UMP-CMP kinase, putative	MNYQKLFLIF FFMFIVKNPY LFVENFYLLK NSKHFPFYIN RTNGSYKKEQ PFKIESQHYN KITRKFYKFK KNIYTSTSNF SINSYNIWEK QFFSNNKFIM SKDQPFVIFM LGGPGSGKGT QCKLIQEKFD FTHISAGDCL REYLKKCEKN EVNTKHQEIV EDCINNGKIV PVDITLELMK IKMESEIAKR KKQEHNELND QGESGVEKKK DSFSFKKLDE NANIKNINIE EYNNKLKYVN NIYENKEVLE ILKNNKCEQK AKYKFIIDGF PRNYDNFNGW INIIGNYAYV HLCLFLYCDE EIMIERCMNR GLTCGRVDDN MDTLKKRFDT HNNDCIPIIN LFLNENKCIF INANKNIQDV WSD…
	MAL13P1.221 / PF3D7_1344800	aspartate carbamoyltransferase	MIEIFCTAIV VITILIVGVF VYMIIRTKKK KLKLDNMFYI NSKYKIDLDK IMTKMKNKSV INIDDVDDEE LLAILYTSKQ FEKILKNNED SKYLENKVFC SVFLEPSTRT RCSFDAAILK LGSKVLNITD MNSTSFYKGE TVEDAFKILS TYVDGIIYRD PSKKNVDIAV SSSSKPIINA GNGTGEHPTQ SLLDFYTIHN YFPFILDRNI NKKLNIAFVG DLKNGRTVHS LSKLLSRYNV SFNFVSCKSL NIPKDIVNTI TYNLKKNNFY SDDSIKYFDN LEEGLEDVHI IYMTRIQKER FTDVDEYNQY KNAFILSNKT LENTRDDTKI LHPLPRVNEI KVEVDSNPKS VYFTQAENGL YVR…
	MAL13P1.227 / PF3D7_1345500	ubiquitin-conjugating enzyme, putative	MFNIMRPIIL FNILIGYYFF IVINNVVGNL PKKNSYYNIP NYKVKNVSNI KNNKYNYFII DTYNNMKRKN NSIYEHNFNN FNRKNKTYLF IDNKKRRRKF FYSKIEENKN LQGKELKPSR TVEKHIKTKY NLGNANYRIQ KELNNFLKNP PINCTIDVHP SNIRIWIVQY VGLENTIYAN EVYKIKIIFP DNYPLKPPIV YFLQKPPKHT HVYSNGDICL SVLGDDYNPS LSISGLILSI ISMLSSAKEK KLPIDNYTHA DAKPGSSQNN FLYHDDKC
	PF08_0067 / PF3D7_0815700	Ubiquitin	MIKKVHICLF IIFFYVIFLI HICKGIRLQN YKNERINNRH MLNTIRNNVS IYQNKHISNN NTKENKCNIM INYYDKSNIF CKSFLLSMEE KDNIKNIKKK IEEIYGIPLT LQEILYDNKK LENNITIQNI IKDKQIKILN LRLITILPHL FLQKDDDNNT NKRNDVSSSS SSSSLYNNEY IKSNKRITYL KNKLTYYGYL TLLNEYKKLS HILENKKYIL KNDDILESFK SFDQEFEKTL KNNNINLHKI KKEINKLKHI DKKKLLLRLE VDYPLMSNNL TKRIKQLFQY YYMGDITTII KFSIFFYILY KYADYPNHIK KFFLYLSILF LISPFKPFYK FSHFLFFSVP NNILFSGFTN ILS…
	PF13_0182 / PF3D7_1333200	ubiquitin-activating enzyme	MNILCIHIVY CFIACLLLCN INQVFTLHVL NYNNGYLYKN LSFSIPLYKN LFQQKTTCKK RKQLLHIKSR GSTYNECSKN CDAYFELNKT NKNITKRIGN IPNVLRKEEK KGRHIINNTK ESNNENCRYK EEKNIIINEN GDKSFYQGDD IEEDLFNSNL NILESEKKYS RQIYTHGYNE EKKIRGSKII IIGLNGISCE ICKNLSLCGV HEIGIYDNNL LTYEDIDNLY LCNKKLVNEQ IKSISCVDNI QKLNESCKIK AITTNLYDNI LNYDIVVTVN QKTNFNIKLN NYCRENKKKF ICVNTCGLFG RVFIDYGDFY YTNNIDTNTT YDNHNNIISD LYKINNLEFL KNNTIVLSYL PFY…
	MAL13P1.171 / PF3D7_1333300	transmembrane protein Tmp21 homologue, putative	MKKILWLCLV IIFEIIGYNG LEIYIKMKGK KLKCIKERIN KDTLVISKFK TNHKNALVSL YIYDVDVNEK NFHTQPKLPI FETVNKHDIK TAFTTFYSSS YSFCAYNNSD KLIEVYFEIK YGTEARDYAQ VAKTEHLNQG TLYLKQILDQ MNIFHVNLKR IRSDEDKEKK AHDKLNDTLM WFSFLNIIII VIAAIVQDFY FKKFFTSKKI
	PF07_0047 / PF3D7_0711000	AAA family ATPase, CDC48 subfamily	MKVRKMHYPL FSFTEYLSCY IILYFFVFLP NYSYAININN YHNKNNLWNI NNKWNNQQSN HFSNNRIGHF LWGSKIRKNP LASISTSITT KKLENQKKKT NKNESYSNVN DKYEHNNNTA HFVQINYKND QSNDTLSTYK NNNEMTVEGK PNNLASGEGK KEIHNTTQKI LEKVDYFKER EKITNSYNNN NNNNKVIVTH DNKNHTNYIN KVENKQSDDK IKNLNNKYIK KFKSHILQND ILGTISTMFW SGKKNNNGNV KKGIKNVPMD EKSYSPNDHD NNSNNSNNNN NNDNNNSNNN NNNNNGGKNN SYYNEKTQKG VNDKETNFLL KALDSGKFPT YCLVENIDEN LDNFDIYMSK EKM…
	PF14_0297 / PF3D7_1431800	apyrase, putative	MENLIGTPLI EKKKKESHIS IRKDKKLNDI EGEKKEKKIK ERLFLCLICL LVIIWLIYFC YKNHIFLSYL QNEKEYGIII DAGSNGTRIH LFEWKKREYE LSNKKEENNL IELKEIFNAK VKKSISTISY NEIKDILIYL INKVIDHLIE KKIYVYNKQK WKSYPFYFQA TGGMRNLKQE DRNLRMKYIK NILSNDNYNP FYFLNEYARI LSGEEEGIYG WLAVNNLLNS IFSKPNNTYG AIDLGGSSTQ ITFYPMDHNI LENYNSILLN NILIRLYSHS FIGYGWIDSL FRVNIYLCLE IIKKLSTRNI KNIYQLENYY DDYINDYFYN NLPNYNWFFY STKKIINNNK ENYNHHNYEN INY…
	PF10_0019 / PF3D7_1001500	early transcribed membrane protein 10.1	MKISKILFFF VAIIAVKLFI PGYVLGGSSG SGGVKKLTDA QKKKKNIIIF SSVASVLAAL IGAGVGFGIY YKNHKSDNKD EGNDKKGSND SKNKSQEGST PLLTAKA
	PF11_0039 / PF3D7_1102700	early transcribed membrane protein 11.1	MKVTRILYFV FFIFALNFIA PNNEHNGYVE AKKKLTPAEI KKRNQKLMMY SAIASGVAVL LGASIGLGVH FSKKKSPKKK VIRQVVKKTP A
	PF11_0040 / PF3D7_1102800	early transcribed membrane protein 11.2	MKITKIFYFF AALLALNFIA PNYFNGYVEA KKALTPAEKK KRNQQIMLIS GITSALALLI GAGVGLGIHY KNKNNGDEKK DKAGAKTITA TPKN
	PF10_0177b / PF3D7_1018300	conserved Plasmodium protein, unknown function	MDVQKKKCKT YYLIAILIWF ILISVVLSRG EIINKHVKKK EGNYKNYEDL DSDINKKNNY YDDKHKNKRL LSDTNINNDN NINNNNNINN DNNINNDNNI NNDNNINNDN NINNDNNINN DNNINNDNNI NNDNNINNDN INNNNNNNSL YNNNSFYNNN SFYNNNSLYN NNYLYNNYTH PKQQDGHKNH PEENKNYTYD DKTKFTKFNK HKNEELFTPN PPLNYEKQTL SNHQNINFDS TVEEGNKDLN NSGNIISQEL EKKLSTDNHK EEGERKKEET NKKHDIDTNN MDDNEEKNIY EYFNKKTKDN FDGLILNIYF TPNNNLYTKV KVGDQVLKLS LNSRLEGVYV FMKDSPACYL EDD…
	PFB0095c / PF3D7_0201900	erythrocyte membrane protein 3	MATIKKYHIR GRKNILIFLL KIFLFSPLIW ILIYSEYFTV VKNYNKIDNV YNIFEIRLKR SLAQVLGNTR LSSRGVRDPR TKEALKEKQF RDHKRKEALK QKTEKNEKAR NALKEKKLKE QKKNDAQKAK DLTKKESQDS SSEKSLKEKV NGEALKEKEN KETLKKKELE NQKEKEEKNK IKDNNDEALK NKGNDKDDKK IVPKKPESVE KDLKEMELKE KEFIKQHLKD YEERKEKRRN WILRSLRRDK LREIEQLEKL NAQLESAINE LKERRASRRP MMVKMQRGMK DEVDEWIKKY DDEQAEKNGT KDEEIKDKGD GYEEIVETKF YGMRENALGE LDEYEERYEK KRYYLKEDGE GDL…
	PF14_0675 / PF3D7_1470800	conserved Plasmodium protein, unknown function	MKIVQAPFFS FFFFLFPVFC FFQCYGIYKN KKISKAFLIH KKEGGGKAFA SNFRSKSKIS NRSNKLNEHI NNIHVGQIKL GYIYDIKDND IYVKLKDKDR NVVIKKENNY LLENKLLYDY LYDRNLINDV LYNKISHENC KDVKDNRKDI QDHYKKQTNP CVVLIKEVNE KNDEILGELY YNEISKRKDK IFDKLNELKS MEKKIFIKIL KNVRNKYYIV LINDCIKGYL LYDEKLNLSE QLHKNIDTYY NKKFNEKYDD QKKSKNINNE LIYNNSKRLS AYIIDVNKKL EYVFLSLYKY PENILNQKLE DIQHTILQEN LFENNYFKAE VTDYCNNGNN IIVKIFENKN ASIRVKIKSH NII…
	PF11_0106 / PF3D7_1109900	apicoplast ribosomal protein L36e precursor, putative	MGRKSTIKPA TGIAVGFNSG HVVTKRNLKL HKKKKPFSKR KELIKDVVRE ITGFSPYEKR IIELIKIGTS ASTKRSLKYA KKKLGTHKRG KAKREEIQKV VILQRRKAAE KH
	PFC0210c / PF3D7_0304600	circumsporozoite (CS) protein	MMRKLAILSV SSFLFVEALF QEYQCYGSSS NTRVLNELNY DNAGTNLYNE LEMNYYGKQE NWYSLKKNSR SLGENDDGNN EDNEKLRKPK HKKLKQPADG NPDPNANPNV DPNANPNVDP NANPNVDPNA NPNANPNANP NANPNANPNA NPNANPNANP NANPNANPNA NPNANPNANP NANPNANPNA NPNANPNVDP NANPNANPNA NPNANPNANP NANPNANPNA NPNANPNANP NANPNANPNA NPNANPNANP NANPNANPNA NPNKNNQGNG QGHNMPNDPN RNVDENANAN SAVKNNNNEE PSDKHIKEYL NKIQNSLSTE WSPCSVTCGN GIQVRIKPGS ANKPKDELDY AND…
	PF11_0224 / PF3D7_1121600	circumsporozoite-related antigen	MKILSVFFLA LFFIIFNKES LAEKTNKGTG SGVSSKKKNK KGSGEPLIDV HDLISDMIKK EEELVEVNKR KSKYKLATSV LAGLLGVVST VLLGGVGLVL YNTEKGRHPF KIGSSDPADN ANPDADSESN GEPNAGPQVT AQDVTPEQPQ GDDNNLVSGT EH
	PF10_0344 / PF3D7_1035300	glutamate-rich protein; GLURP	MRNLFHITIC LVTLNLFILE INAKTNTSEN RNKRIGGPKL RGNVTSNIKF PSDNKGKIIR GSNDKLNKNS EDVLEQSEKS LVSENVPSGL DIDDIPKESI FIQEDQEGQT HSELNPETSE HSKDLNNNDS KNESSDIISV NNKSNKVQNH FESLSDLELL ENSSQDNLDK DTISTEPFPN QKHKDLQQDL NDEPLEPFPT QIHKDYKEKN LINEEDSEPF PRQKHKKVDN HNEEKNVFHE NGSANGNQGS LKLKSFDEHL KDEKIENEPL VHENLSIPND PIEQILNQPE QETNIQEQLY NEKQNVEEKQ NSQIPSLDLK EPTNEDILPN HNPLENIKQS ESEINHVQDH ALPKENIIDK LDN…
	PF13_0082 / PF3D7_1314500	cop-coated vesicle membrane protein p24 precursor, putative	MIYFKNIVLL SFLLLFFLFG IIQCTHFNIG PYEKDCIQLK PEKNNMIVGS YEFMDRKASC IISIFNRSDK KKEPVFKSTK IQDKFEIQVP AAAVYSFCYD NRKNSDVTIM FTLRVKESHN VNDSELSTID DVKQINEKTS ELFDQFLEVF DEQERMMEKS DLYKQFNEKM NSKLILWLEI QIILLVVLTL VHIYYIKSFF EIKTIV
	PFB0300c / PF3D7_0206800	merozoite surface protein 2 precursor	MKVIKTLSII NFFIFVTFNI KNESKYSNTF INNAYNMSIR RSMAESKPST GAGGSAGGSA GGSAGGSAGG SAGGSAGSGD GNGADAEGSS STPATTTTTK TTTTTTTTND AEASTSTSSE NPNHKNAETN PKGKGEVQEP NQANKETQNN SNVQQDSQTK SNVPPTQDAD TKSPTAQPEQ AENSAPTAEQ TESPELQSAP ENKGTGQHGH MHGSRNNHPQ NTSDSQKECT DGNKENCGAA TSLLNNSSNI ASINKFVVLI SATLVLSFAI FI
	PFB0335c / PF3D7_0207500	cysteine protease, putative	MICPIFFLYI INVLFTQYFI KCEGNKVTVI SHNNGHNDNL DVNKNGVISQ ENVFDTSESL NLPSNKKVGS DDLNTTTISF TVPDNLENEV KVVSSSESGK GATVSHTKVT SEGLSDTQPN VTQSVSSSTH TPGSLDSTMS TEQHSSVSQS SLPTESSSET LNKATVPEIP IQINSGLLKN YNGVKVTGSC GSYFRVYLVP HILIYALTKY SVIQLESLFN DNARIDVEHK GELQNKCSEG YHFKLVVYIT HNVLNLKWKT YKPNEESKSE DSDVRKYRIP KLERPFTSIQ VYTANSKAGV IETKNYNIRT DIPDTCDAIA TDCFLNGNVN IEKCFQCTLL VQKKDKSHEC FKYVSSEMKK KMN…
	PFB0405w / PF3D7_0209000	transmission-blocking target antigen s230 precursor	MKKIITLKNL FLIILVYIFS EKKDLRCNVI KGNNIKDDED KRFHLFYYSH NLFKTPETKE KKNKKECFYK NGGIYNLSKE IRMRKDTSVK IKQRTCPFHK EGSSFEMGSK NITCFYPIVG KKERKTLDTI IIKKNVTNDH VVSSDMHSNV QEKNMILIRN IDKENKNDIQ NVEEKIQRDT YENKDYESDD TLIEWFDDNT NEENFLLTFL KRCLMKIFSS PKRKKTVVQK KHKSNFFINS SLKYIYMYLT PSDSFNLVRR NRNLDEEDMS PRDNFVIDDE EEEEEEEEEE EEEEEEEEEE EEEEYDDYVY EESGDETEEQ LQEEHQEEVG AESSEESFND EDEDSVEARD GDMIRVDEYY EDQ…
	PFB0915w / PF3D7_0220000	liver stage antigen 3	MTNSNYKSNN KTYNENNNEQ ITTIFNRTNM NPIKKCHMRE KINKYFFLIK ILTCTILIWA VQYANNSDIN KSWKKNTYVD KKLNKLFNRS LGESQVNGEL ASEEVKEKIL DLLEEGNTLT ESVDDNKNLE EAEDIKENIL LSNIEEPKEN IIDNLLNNIG QNSEKQESVS ENVQVSDELF NELLNSVDVN GEVKENILEE SQVNDDIFNS LVKSVQQEQQ HNVEEKVEES VEENDEESVE ENVEENVEEN DDESVASSVE ESIASSVDES IDSSIEENVA PTVEEIVAPT VEEIVAPSVV ESVAPSVEES VEENVEESVA ENVEESVAEN VEESVAENVE ESVAENVEES VAENVEESVA ENV…
	PFD0530c / PF3D7_0410700	GTPase, putative	MLLNIFVLLV NINLLLCAQV KNFHKQKNIH CYVLPYAKKN IYPCKTKVLK KNNYLSIKNG KSKKYGCNEL FRQKGDELDE YKDNKIDDEK NDNKSNDKRN DEKNDNKTND KRNDEKNDNK TNDKRNDEKN DNKTNDKMKD EKNDNKTNDK MKDEKNDNKT NDKMKDEKNN NERNDKMKDE KNDNKTKDKI NDDIYETFDE YFNKRAEENY TKLEGEKLKI LKENIHTNKD EIRNVLKKTY KNEYNKLIKE DQEDEEVSQA VYENIKITFL MKENINNFLF TQYSYMINKL KEKSVIIKNL KKFYNQNVNP GGDSVHQNED ATKTNNVTDK DNRTHIDDSN QNNNINYHED IHNKNYINNH EET…
	PFD0710w / PF3D7_0414700	GTP-binding protein, putative	MKFIVKVILL VNIYSRIFCH LQNIKHTHKN HLLFIYIKNH NFILNTKKFK KNDKFIRQKS TFLSSSENEQ NDGNVNKKQN NTAGSIKFYD FSHIYKHYNI EKKNKQSSST NDNQEGVNYM EPENVSDIMN DNIINKQNNN NNNNNNNNNN NNYYNNRTVY SSNEESLNIE ENNSYTQSSS DTTNNKNNSL LVKDDPNRIQ KVIFENVYDY SSIFKDKEKK PYVKTYVANV FQKMPKFKDN SKVIKDALLY LKFIEKGNLY LIKNVDKKSL NAEPYDDFSN KKKKKGTKKD KIKLELTSIY NNINKEKHTK KRICKECCIK IDLYTKLLSR PLNNIYNMHR NLKKFLHPFQ YSLYENTVTN LYK…
	PFI0570w / PF3D7_0911700	GTP-binding protein, putative	MNYTSVNKIR LWVLIVFLIL YNIKCICENI SDLKKRLCFN NFSNSKKKIK KKWLAKKKKN YLTIWKNKTY TTKRRNGYGK IEYKREENKK DDYNFMNTSL YLNYISNVKN FLFNKNNNKK NKIYYHKCKK SNIIEAKIND NDTLLSDEEF RNDVDRNDKE YYNIKKEYSE NVCNQNRIND LSNCSVSSNN NILNECSSEV KKEMNYPLHN ELYDNLNDNT IGHLKSEKCK EKYIRNFCIL AHIDSGKSTL ADRFLELTNT IKKKRMQEQF LDMMCLEREK GITIKLKAVR MHYNNYVFNL IDTPGHFDFY HEVKRSLNVC EGAILLIDGG KGIQSQTLNI FFELKKHDIK IIPVINKIDL STC…
	PFI0880c / PF3D7_0918000	secreted acid phosphatase	MNYCKTTFHI FFFVLFFITI YEIKCQLRFA SLGDWGKDTK GQILNAKYFK QFIKNERVTF IVSPGSNFID GVKGLNDPAW KNLYEDVYSE EKGDMYMPFF TVLGTRDWTG NYNAQLLKGQ GIYIEKNGET SIEKDADATN YPKWIMPNYW YHYFTHFTVS SGPSIVKTGH KDLAAAFIFI DTWVLSSNFP YKKIHEKAWN DLKSQLSVAK KIADFIIVVG DQPIYSSGYS RGSSYLAYYL LPLLKDAEVD LYISGHDNNM EVIEDNDMAH ITCGSGSMSQ GKSGMKNSKS LFFSSDIGFC VHELSNNGIV TKFVSSKKGE VIYTHKLNIK KKKTLDKVNA LQHFAALPNV ELTDVPSSGP MGN…
	PFI0960w / PF3D7_0919600	dolichyl-diphosphooligosaccharide-protein glycosyltransferase, putative	MKIKIKNFLF VCFLLFFLIL SFRYSCEKKK LQTVDYKKKS ITGRIKNKIQ KYKEKKLILI TDITNINERY SSFLHILNTE GNYISKIINI LSPDDIHKIN YCLYDGLIII LDILNDKIVE ILKASYLKLF IDKKKHIFFS LNNVIGKNAV HYLNEINISV HGNSSYVNDY FNNIVIKNDD KEKEINIKKR NKQKEFFTNQ IISNTPITSI KNNILFKGTA HSVLLKEKYF LEVLTCTRTC LLYDKNDQVI KRQKQGTDLL LISAIQLENN SRIVFSSSTE IFSDYFFNIH NANKQFTYEL IKWNLKKSGI IRYNNFKFYK DINQDKSNNT FFINDFVNMS IDLYHLKNNF WIPYKNNNIQ IQI…
	PFL0080c / PF3D7_1201600	NIMA related kinase 3	MVCIYLFCFL LFHLFVVNTR MRILCNLLIV ICEYMFPFYS FILFKFVKML SLLLPSILSC EKKYQVYKNN GYKFETVLDF MTSDSEIHLI RSIESDEIYI SKVYDIYGIN EDDLNKYMNE LYIMNKLRNC ENIVNIIDYI KENDTLSFIL EFCNQGDLHS DILRKKLNNE IYTESEIFNI LHQILNGLNI IHQNGIIHGD LKSTNIFIKD NKIKIGDFGI SSEQSSNNNL GTLNCLSYES IKFKKTNKLS DLFQVGCILY ELATLSSPFC ATNINDMISL FEDKNYKSYI IKNISSIYSQ KLVNVISKLL SLNTLERLEV ITNYNLETTQ HVHLENANKI ISCITVQ
	PFL2115c / PF3D7_1244000	glucose inhibited division protein A homologue, putative	MFIIIIFFEM FIRFNKFLKL KVSFYSLLLL LLFIIYIFFF CSPCYAYNFS KVKQTFLWPY SPPKIKRGNH LKSSQISEKC PCNNVKKNYD VIVIGGGHSG CEASYISAKS NAMTLLVTQN KETIGEMSCN PSIGGIGKGI LVKEIDALGG LMGKVIDKSG IHFKILNMKK GLAVRGHRAQ ADRDLYNYYM KEYLYNTPNL DILENSVQSL LIDTYEDKNN NNDNINDYNN NVKKKKIYGI KNKCSCEIYS HNVILTTGTF LGGICHIGKD KYIGGRIKRL INNFDLKMKK GNIESIKTND EPIIKQDKLK KINQNGESTI NNMHNNYNED NKKYINYEEN LNIPFEKLIE SSTKNIAQQL REN…
	PFL2510w / PF3D7_1252200	chitinase	MNFTVKYSFL VICLLCCLLS TYVSVIEGHR ARPGESRKNP REIIKTFKES GKGIIQGYYP SWVSYNHNLK DLNPNLNVVH MSFAKMDLSY DSIESIVGSP LLFKSLIGLE YIGLNEYFND AMNLRKARPD IIMLLSLGGE TYHPSSFDSA LNAVEKIANL VDELGFDGID VDYEPNGSFD GLNDKEKADF FVQYVTKLRE YMCDDKLISI SQSSNGALSC IGFNDPKKIC MDDEAPYNSK YFNKPDVKKE LLRAAQMASA GGAIYLMNNL KDMIDMVFVQ TFNYTNSTDS TVMKELYDSY AYYGKKYDYV IIMGFTLMFP STPFNPNDKM LVKSIGDFVK TENKLNKRAD GFGLWSLSSD NAA…
	PF08_0108 / PF3D7_0808200	plasmepsin X	MKRISPLNTL FYLSLFFSYT FKGLKCTRIY KIGTKALPCS ECHDVFDCTG CLFEEKESSH VIPLKLNKKN PNDHKKLQKH HESLKLGDVK YYVNRGEGIS GSLGTSSGNT LDDMDLINEE INKKRTNAQL DEKNFLDFTT YNKNKAQDIS DHLSDIQKHV YEQDAQKGNK NFTNNENNSD NENNSDNENN SDNENNLDNE NNLDNENNSD NSSIEKNFIA LENKNATVEQ TKENIFLVPL KHLRDSQFVG ELLVGTPPQT VYPIFDTGST NVWVVTTACE EESCKKVRRY DPNKSKTFRR SFIEKNLHIV FGSGSISGSV GTDTFMLGKH LVRNQTFGLV ESESNNNKNG GDNIFDYISF EGI…
	PF10_0329 / PF3D7_1033800	aspartyl protease, putative; Plasmepsin VII	MNKNIIQIYL FVFILLLKQH IVILKNEEFT NPYSIRKKDI KAIVNVNNKL KSINIHKLDN INKKDLLGSY NENYILIKLK KQDIFSKKLS TYYGEVQIGE QSENNMNVLF DTGSSQVWIL NDTCKNSLCN NIHSKYKRTK SFVYKYDKKG LPSVIEIFYL SGKIVAFEGY DTIYLGKKLK IPHTNISFAT KVDIPILEEF KWDGIIGLGF QNGDSIKRGI KPFLDILKDD KILTNKNYKN QFGYYLSDKE GYITLGGIDN RLKNTPDEEI IWTPVSTEMG YWTIQIMGIR KEYVNNHFEE NKEEEEVIVK YEAFHDGGKN SIIDTGTYLI YAPKNTMENY LKDLKINNCD EKYNLPHLIF QIK…
	PF14_0076 / PF3D7_1407900	plasmepsin 1	MALSIKEDFS SAFAKNESAV NSSTFNNNMK TWKIQKRFQI LYVFFFLLIT GALFYYLIDN VLFPKNKKIN EIMNTSKHVI IGFSIENSHD RIMKTVKQHR LKNYIKESLK FFKTGLTQKP HLGNAGDSVT LNDVANVMYY GEAQIGDNKQ KFAFIFDTGS ANLWVPSAQC NTIGCKTKNL YDSNKSKTYE KDGTKVEMNY VSGTVSGFFS KDIVTIANLS FPYKFIEVTD TNGFEPAYTL GQFDGIVGLG WKDLSIGSVD PVVVELKNQN KIEQAVFTFY LPFDDKHKGY LTIGGIEDRF YEGQLTYEKL NHDLYWQVDL DLHFGNLTVE KATAIVDSGT SSITAPTEFL NKFFEGLDVV KIP…
	PF14_0721 / PF3D7_1475300	cytochrome c oxidase assembly protein, putative	MKILKTFFKR LHLRNKKNVI SPYRILERKE KLDIPYACLS LSAIMFGLSF AFVPLYQLFC QSTGYGGTIQ KRLDIGKIFN RKKDEKNRLI EINFTSQSNM PWVFEPEQKY IIVKPGETVL AFYKAKNLMD KPIIGIALYH VLPEEAGLYF NKIQCFCFEE QMLNAKEEMD LPILFFIDPE ILNDSRLKNL EKITLSYIFF ESDSEIPEEY QNLSRAISPY KKTEIQVI QSTGYGGTIQ KRLDIGKIFN RKKDEKNRLI EINFTSQSNM PWVFEPEQKY IIVKPGETVL AFYKAKNLMD KPIIGIALYH VLPEEAGLYF NKIQCFCFEE QMLNAKEEMD LPILFFIDPE ILNDSRLKNL EKITL…
	PFI1580c / PF3D7_0932500	DHHC-type zinc finger protein, putative	MINVLPYVVI SLKLCLLFTC IHLKNIYPFV FSSFSFFLFV YLFSFLLYII VSYRNPGYVT TCPTNYIETD QNIQLKNFVK QKKYNNTKED HNNNNLKYDT YNKLSYFSTN DSGTSCSFFS SSTSECSTDE LRSLTILHHK KKNTIITERC MRKKERYNQD FKIDENYIMT NYKKKENPIE VKRRYICYKN KRNDQLYNRC NFFLKLKDIT SSLNKETDEN TQNVDTNIIN IKKFNKLNMF KINITKNHIV VLYKKKVPYY KPLYLRNINY IFINSNGKLK YTKKRTPNMF ISNNNIKLNK INKHDIIFYK NIKEKEKNKN NHIFYLYRNK LYQYNIPLPY CKICDVYQIL RSKHCQMCKR CVR…
	PF11_0165 / PF3D7_1115700	cysteine proteinase falcipain 2a	MDYNMDYAPH EVISQQGERF VDKYVDRKIL KNKKSLLVII SLSVLSVVGF VLFYFTPNSR KSDLFKNSSV ENNNDDYIIN SLLKSPNGKK FIVSKIDEAL SFYDSKKNDI NKYNEGNNNN NADFKGLSLF KENTPSNNFI HNKDYFINFF DNKFLMNNAE HINQFYMFIK TNNKQYNSPN EMKERFQVFL QNAHKVNMHN NNKNSLYKKE LNRFADLTYH EFKNKYLSLR SSKPLKNSKY LLDQMNYEEV IKKYKGNENF DHAAYDWRLH SGVTPVKDQK NCGSCWAFSS IGSVESQYAI RKNKLITLSE QELVDCSFKN YGCNGGLINN AFEDMIELGG ICTDDDYPYV SDAPNLCNID RCT…
	PF11_0161 / PF3D7_1115300	cysteine proteinase falcipain 2b	MDYHMDYIPN EVISHQGERF VDKYVDRKIL KNKKSLLVII SLSVLSVVGF ILFYFTPNFR KSDLFKNSSV ENNNDDYIIN SLLKSPNGKK FIVSKIDEAL SFYDNKMKDI NKNNNNNTSS DFKGLSLFKE NKPSNNFIHN ENYFINVFDH KFLMNNVEHI NQFYTFIKTN NKQYNSPNEM KERFQVFLQN AHKVKMHNNN KKSLYKKELN RFADLTYHEF KSKYLTLRSS KPLKNSKYLL DQINYDAVIK KYKGNENFDH AAYDWRLHSG VTPVKDQKNC GSCWAFSSIG SVESQYAIRK NKLITLSEQE LVDCSFKNYG CNGGLINNAF EDMIELGGIC TDDDYPYVSD APNLCNIDRC TEK…
	PF11_0298 / PF3D7_1128700	GPI8p transamidase	MGIKIIIYIF FLSWAKWVCG SVNFTGFDNK NMIGKHVELE GRYKKEYIDR FFLEELRKHN YMNNNVILLS TSRHYFNYRH TTNLLIAYKY LKYFGDTMDK NILLMIPFDQ ACDCRNIREG QIFREYELFP SSHNKETKIE NINLYENLNI DYKNNNVRDE QIRRVLRHRY DAFTPKKNRL YNNGNNEKNL FLYMTGHGGV NFLKIQEFNI ISSSEFNIYI QELLIKNFYK YIFVIIDTCQ GYSFYDDILN FVYKKKINNI FFLSSSKRNE NSYSLFSSSY LSVSTVDRFT YHFFNYLQQI HKIYEKEPSK NIKAFSLYNI LNYLKTQHIM SEPTTNNSKF NSSIFLHDKN ILFFNSNLLI IHK…
	PF14_0078 / PF3D7_1408100	histo-aspartic protease	MNLTIKEEDF TNTFMKNEES FNTFRVTKVK RWNAKRLFKI LFVTVFIVLA GGFSYYIFEN FVFQKNRKIN HIIKTSKYST VGFNIENSYD RLMKTIKEHK LKNYIKESVK LFNKGLTKKS YLGSEFDNVE LKDLANVLSF GEAKLGDNGQ KFNFLFHTAS SNVWVPSIKC TSESCESKNH YDSSKSKTYE KDDTPVKLTS KAGTISGIFS KDLVTIGKLS VPYKFIEMTE IVGFEPFYSE SDVDGVFGLG WKDLSIGSID PYIVELKTQN KIEQAVYSIY LPPENKNKGY LTIGGIEERF FDGPLNYEKL NHDLMWQVDL DVHFGNVSSK KANVILDSAT SVITVPTEFF NQFVESASVF KVP…
	PF14_0470 / PF3D7_1449400	DNA replication related protein, putative	MDRNCNYMNK IINSKNRRHY SMHPENAIFF DYFINLKKKA IAQGYNNLVI SFKKIISSIT KYPLPIKNSL DAYKLKGVGK RFSNYFEKAL SQSKVDKKIQ NLKEDFISSK SEFRINIHIN KVINSADKFL KDFDKEIYNI RVLGELSDDN ILNNIREIEN DNLCNVNSKN LNQCTLVSSN KLNESYSNGK SLSLCTNNIE KVTSLNNNKK KKCIDMNDTE KSIITYLYKY GHLYNEHALS KEEIISGVLK YYERSIVVNY KTLRRLINRE FIEKTESVEN RICNNIKSSK IKTKLKVINK IRLTKKGKDF LDNEKDYILD CSLINTENIY QLNNTKEEES MLHTENVKNM ISQYSFNTDN ELK…
	PFA0200w / PF3D7_0104000	thrombospondin-related sporozoite protein	MLMKISRYFF LLYLIKAHLD FFLRYRTGFI RSRLETYIGN SDVRYNKSFI NNRLLNEHAH CDAWSEWSAC SKTCDYGIKI RVKISTDQTK SKACSNITES TICHEHICPR TFEEAEETYL HNKEKEKKKK FRTTYILIFT IFSVVNIVVL LICVILSIKK KII
	PFL0870w / PF3D7_1218000	thrombospondin-related apical membrane protein	MIDVLLNKTN YLYFTFLLFL YISSNDLCSC NLKVRNNWEH FLQVYQNNGN FKMEILEPEC TIQKNLPSEE EKEEFIDFDR KELLLHDFVV IKNSQFTDEK TLELYLSKEE NNKSYLMLTF YLGDLKLMIG HNSPYEISLI LNVATVNKNM SNCKNNSYNI VLLKTTDVFN TSDLEILEGP IQFSLGKSSG AFRINVTNFF LNNTWKAFTK DKISFLIKPE ENCYTILENK INKPQLLIEK KTTFYSEWGE WSNCSMDCDH PDNVQIRERE CIHPSGDCFK GDLKESRPCI IPLPPCNELF SHKDNSTFKI LMIILPIVLV ISIITILYHI FYKRKGAEKE LYENVAGRYM YD
	PFC0850c / PF3D7_0319200	endonuclease/exonuclease/phosphatase family protein, putative	MKCQIFYKCL FVVVIFLSEY NTIMLSTRRN NHNTIKYIFN DKLNFHEKEK KSYTFPYINV IKKKRKKTQS CIFSSPIKIN FNNFVYKSRR NISSSFHNLY NTNQIDTNIN NINKKRFSDP LHFFIHSHIS QRINNNNNNN NNKYNIYNYH FSPYYYKKKN HFVTQLKAEN TYFIKELVTK HKTASQSNLD NNLILNEKKM EINIITNKEE QEEEQEGGKK KKNEEQNSKI SHNINIYDVK EDNKSKELKE QQNDIKNMNI DSIMKTKNND SNTIYYDSHR NSNILTLEEL IKTKKITNIF IINNSTENEE LNIELYFDHK ELKLLRKKEE TLNSLKNRLT LNLLKLEKKK LKRKRQHGEV KEQ…
	PFD0295c / PF3D7_0405900	apical sushi protein	MKIIYHILIF LLHYNIIIKA KENKNDNFLN GIYKLQNIWR NTTLGELDLK KANIENAEGI IEKFNDSNKT DFNQHPHFRS KLSFLEHKNH KDMGIVTNHQ NKDHKKNEYT SEEIIDMKPQ LASQEMWRKG ENFYMHGATN TNEQNDDEDL FESFHKNHNS NIKINSPCFD LQDKEMCSNN KECFYDDAYK ACFQNCALVN EKKCSLYSEC KHTPNGCQNE GYLNIQVFGS NLGGDVRACE LFESEGSCYL MEKLFKKLSE EKKETSFNCV WISYKHELRS YDDENEPKEN NDNIVALENK NKYMYMNNVE SIHNNHHLEN PYHEDIKHNK HKSFNYHVLS SSVPRQIAKN EKFLSLLQLN LKG…
	PFD0430c / PF3D7_0408700	perforin like protein 1	MKLRILKKHY YVVFILLYLY DISCFKCIRL NNRSIYKNKY KNNVHIGTNE NIRSIEKYSN VLCNSILCKN DKISSFINQR KNVDDDDESE NDDMYESTTA GSSSETDNES DEEENDSSDN NNSDEEQIEN SNNNNSDEEQ NDSSSNDNND EENEEQDDVM DNDQNDKKIK HSFNLANESK HTKEERVKEE KKLKIYDFIN DKEKRLNFNG DQKDEDNEEN DDKDENTLEN RNIISKHTSV FPGLYFIGIG YNLLFGNPLG EADSLIDPGY RAQIYLMEWA LSKEGIANDL STLQPVNGWI RKENACSRVE SITECSSISD YTKSLSAEAK VSGSYWGIAS FSASTGYSSF LHEVTKRSKK TFL…
	PFD0440w / PF3D7_0408900	peptidase, M22 family, putative	MKNVSTHIAIYLFCYIFLIHYLCYTFKIDNIPIKNNKFSDILQRAVKNINKHLNKKNVNY DICKYRKIPKILLQTNNCKKKKKLNYIVGIENTCDDTCICVIDTDLNIIKNVIISHYKVV HSYEGVYPFFISSLNSLFLKHYVNKILDNIDPKHVICYGFSSCPGIAKNMEAAKNYIGEK KKQNENIKISAVNHIFAHILSPLFFNFYNDKHTYTNSAEYKNENIKADEEDDKIYLNISE SIKNDKEHKNKIKNVLEVLNKNIITQEKLINLIEDDFFTYGSYVLNRIKKKKKTEENKLD DNKINNTEEKTVNEEKKDIHNETLNIIQTEYMKDGYLCILVSGGSTDVYKVQKDTKNAIN VCKISTTMDITIGDVIDKVTRLLELPVGLGGGP…
	PFE1045c / PF3D7_0520800	conserved Plasmodium protein, unknown function	MINYINIYVI IIILCYFVEK NATIKIRRIN DYLNFIQPNI FRNITKYDLS TPFNVIREKK GRNEFPLVNN VDIGVSDINE KALYDEDTKT DDLKNIINKK DLKNYDNIND NINDKINNSI NDNINNNINN NIINNINNNI NETDNINKVD HMNYIPNDHN LSTKHSYDNN TNDDEKYLNG EILNEEEINE HMKFQQWSDR FILSKDEEYY YDIQNECVNT KYYDKINQIN DHIYKEENIM EDSSIQLMPF CNRKDKEKIC QPLTKHINEK LSYDFYTNNT TDNVNKKENH LSPKECNNNN NIFDNPNEKE NSLKKPFHQK KTTTLNEEEI NNLSIVDMTK RTNMILPLRS LLMSIYIGKE AFN…
	PFE1445c / PF3D7_0529000	conserved Plasmodium protein, unknown function	MYNFLSCKKK SIILQVLLII CTYNILLNFV NIFVNNNEKN HKNKYENRIK SFYVEAYNWN FLEKWKSINT NEKLEYKINY NIGLNIDAEI GDFGDYNSDV KTDLILFKYD KDKLLSTIFI YVFSVKENKF IYHTEVSFEG KIMNVTAIDL NFDGALDVLV LFKDNKDSSK SNKYYVAAFL QNDNDQLEEI WNSKKKEQND ESITDNEEDN IYYTNIHPLI CDINNDGLPD IIGQQSGGPD GFFRFIWINT RNGFKSFLWK NINIFKYSEL DEITNPNSSA IVDINGDCKS DLVFTVYNSY EKRIGLEIWL NKIIDGKSFY VKYSQDYLLP PNSLQVLFGD FNGDGSIDLV VPTCVKSSFC NYC…
	PFI0185w / PF3D7_0903800	LCCL domain-containing protein	MYNFFLSIIC IFFIPYFCRA SFKEYLSNKK IFLKYNGTYC LYPENVIEND IIEIATDECD KVAHEYENKI VWFSFDNGRL RSNNGMCLKT YKNILVLSTC SPNKNEKSEM WKIDEETHLK NENNNCAQIA GNKLFSFTCN NLSTKEFEQS IFSSDELYLM KTRYSQQKLK NIKTEDIDTF HNNFNTLTNS YKEVDTKIVH ILNRDKEMKK QKEKILHLIN DMKLLVNTSS SLNEYGTGAI MKIYDNMDIE QKKYLLNVPL EKLEINEEKL DELGIEQGQI KIIIQSFLNV PENNTYTFYV KNIVGYINIK LNNEEILSNR NIEINNRTNN SAVVKLRKNK LIPIYIEISS IGNEKPSFSL YWS…
	PFL2245w / PF3D7_1246800	signal recognition particle receptor, beta subunit	MDILNKIIKD IIYKIKIYHV KYGIHLNDFH NLLFVITLLF GLVFLLYLLL ILFNIFFKKS KANNVVLLLG PCDSGKTTFL FKLKTDKLCR TVPSMKENIA FIFLKNKKKQ KCIRFVDFPG HPKLSYSLNK YFNITNVIVY MIDSSDRQSL KFVAEKLFEL FTNKVIVKKK IPFIIVCNKT DLCNSRPKQV IKEDLEREIE ILKMSKYNNL DDDCIDETEC FLGANSEFFR FEKAPCHIEL CSASVKNNNV DEIIEFVEKH Y
	PFL2405c / PF3D7_1250100	osmiophilic body protein	MKLLLFFFIS SIFLQLTSGK RILNFDNIIK HLKESKLLPE DIPHVLENDI IIVPPYLIYK YKGKIYHLHN NVDLTLINHP EEDSCDKEEI WESPFPPKVP EPERPHEPEM EPQVEPEPGP LPEEVREPEP EPEAEPEKEL EMEEQEEVIE ADMVLDEETG IKIPKKTEQD VLEVSKFREE YELPNVVELT PEEKEKNNIL HFAGNKSTAF NLKEIINYKK DESLMNSLSS SFDHFYTPNV EERNLSNAYN VDINDYYDLL RALHILCKDE DNKLYTINRI PKDELLFFLK HAYVNIYNSL KKYILLNGYN FEDYIYTSEN FTLDQIFKDY FFLSNDDTNE NGSFNNIIES IKYIKKAIEK LNV…
	PFE0830c / PF3D7_0516600	sporozoite surface antigen MB2	MFLIWRLYKT LFLILYIIIL QEYVCHSSNH IKSVNRCFIP FISEYIYKQK NRKNNISYDS SNSHYNDKII PCGNYNKQLK YKINFCRNLY FNNKNEYNRI CSRNKLNFHN IQTDNTIYKP KKKYYEVGKV REKIKMYTLF KDDKINTLKC NEEESVTSET INKHDSSVKV KGRRKKNITS NENIMNPNNK SVSSINTNLS DSSNNKNDNS LNSKKNDNTL NSKKNDNTLN SKKNDNTLNS KNNNNSLNSK NNNNSLNSKK SNNSYNDKHI DHIIPEGKNK INNNIDVKHN INNKLNEINE EPYEDTHNKE ENSSNKNDND EKRKEENNNI TRRYIKNDQM SYNNINTNSN EYDKNASTLD ETY…
	PFC0260w / PF3D7_0305800	P-loop containing nucleoside triphospahte hydrolase, putative	MMKIFINNVN TYSGSCFCKT FDEIKNEKTT IYGTVDDHNL SKEDCIFYNY DNVKKIISKI PKDNIVKYIL KCKLVIYDLH NTDLEEIEYV IRKLKYEKIK HNMTIILISS IMTWSKTKRK FIKKIVEENK EITKNQSNNI THKSGETNNN LEKKENQNIE TKNEKTSKKK DKKKNENYNK NNKIVDHGVH NKQANIIKNE DAKSNIQEIH IEEIKKKEKI LYIPQIFNEK DYLKRISSTH FDEYKSVETL MLSLNSMKNI KTHVVVSGLL YGNGENVFFS IFKNAWLSKD NHIIDKGDNY IPVIHIRGLC EYIKQLYISE SKKKYLIAVD NQYITQKEII HTIASHISGN MNFMHVSPHE SIF…
	PFD1165w / PF3D7_0424500	serine/threonine protein kinase, FIKK family	MKKKTREEII IFLKWVSCKK YIFSVFVFLC CFLMSFNIFE PRIEIIELNW HVRYYRHLTE VWDNNNNNDE GEQNLKDKYD TYDEKEKVKK KYVEDEFNTK EKVKKKHRDD KYNKKEKSKK KHRDDKYNKK EKSKKKYVED KFNKKNKHKE NDVSLKKDQC KKSLSIREDC NNKNSKSYNE KEICDNENCV NLEDIKIYDN TTWKYKIKKL ITCSYNSDKD AKVLYNWKLG KSILGKMINS TEDFSINGIS YKDWTLNTIP DIGYSQNNRR SQEVFKTEVK SKDENTESVK LFIKKVPASI WVRQYIILNE HKGEYSLGEE NFVMEAISLA FLNKYYPGIA PKFYGILYES PDKPNDNVCF SFG…
	PF08_0067 / PF3D7_0815700	ubiquitin	MIKKVHICLF IIFFYVIFLI HICKGIRLQN YKNERINNRH MLNTIRNNVS IYQNKHISNN NTKENKCNIM INYYDKSNIF CKSFLLSMEE KDNIKNIKKK IEEIYGIPLT LQEILYDNKK LENNITIQNI IKDKQIKILN LRLITILPHL FLQKDDDNNT NKRNDVSSSS SSSSLYNNEY IKSNKRITYL KNKLTYYGYL TLLNEYKKLS HILENKKYIL KNDDILESFK SFDQEFEKTL KNNNINLHKI KKEINKLKHI DKKKLLLRLE VDYPLMSNNL TKRIKQLFQY YYMGDITTII KFSIFFYILY KYADYPNHIK KFFLYLSILF LISPFKPFYK FSHFLFFSVP NNILFSGFTN ILS…
	PFI0120c / PF3D7_0902500	serine/threonine protein kinase, FIKK family	MEFLYFIFQV LSLIRINQNT VFYRSLKKCR YLSEIIIENV TSTKLYSDDC YDKNGVINDN NYVLKNTYDE YESYKRIKKI KQCKNILKEN KLSESILPES TLPESTLPES TLAESTLAES TLAESTLAES EFSKYKLSND TINENLESHL YLNSSPSTSH SMYYHDSKCN ENINESNNAT NELMEKSVSI KYPIYNWELG KACLSKYLGH SNNYFLNGVK FDEWKLVSFR DRYYNERKGR VHKILKTKIT GNDGNNKREL KLFIKRIPID MWLKQFEMMD TYNGEYIICA ENFVMEAIVL SFLSAYHPGI GPKFYKLLFN PDNYYIDENN SSMNNINDIS LFNKLLSDRL RMNMSGYILM VSE…
	PFI1195c / PF3D7_0924300	thiamine pyrophosphokinase	MKKKYPYIFK MISLKYFSYF KKGPKVSCGN KERMTKNHKH HYSTIKEKDD FPHYHNLDFM KYIFSNNNKD KAQDIKISTS VDNTNPNVCT DIYNYKLITI ILNNTLCSHS YEIIKNSNIL ICADGGANRL YDLCCTMNEQ HVSNYCINNN RSFVQGMELN KNDYKKEEMK KRGKQDISNP IIQHTNDKNV TSKQLYDLFN NNHKLTINVD TKKRKENRDY SVEILPDFIC GDFDSIYPHV YKHYKNKGVL FEKCQNQENT DLDKCIEKIK PYIYENDKIL VLGATGNRFD QTCANISSLY KNVQTINNIY LIGENNFIFL LKKGNHVIQI NLNAFQKGCA LLPIGGKCKV KTEGLKYNLN YEY…
	PFI1285w / PF3D7_0926300	protein kinase, putative	MNTDISENND TNIYNATTEH EKLYSIHSTM KKKNYELINN SDETYNYISH HNLKDFNNDV ITTIQNDDKD TINYHKNDEK IKHVEREEDN INKTHIEMLR KLKSNQEINL KRGEEINKNV CTFLYDDFIL SKKKKGLNKI INKLSLNTFN LYFRKHSNCY IQVPPVLNLL RGDIDDILIG LKYLFDNIDE INFLILNFLN KLKKKKKIQK NKVLLHLIDF ILNKLFENNL NYRYKKTCIL DFYDNLMFNK NTFFESGIIN DAINIKDLRL IYFYKHNIKM KKEKNFLVKN KIYNYDKNRE QNILQKRDNK NEDNTDQQYY HKNDNINKCN YFVINQSTHI LNEKYYRKKR KKKKFVCGEI PLP…
	PF10_0093 / PF3D7_1009600	protein phosphatase, putative	MIYTRVYCIF IILLLNNMLI THNRECSKSV QGLVVEKFNK KMNYLLKKED FYIYRQNFNF FPKELEVQLR KKKNKIQNET GVIDGVIDRI SSISTQQNKG DNTNVDERYI NVDNSNKIKG NNMNNMNNMN NVNNVNNMNN MNNMNNMNNM NNMNNMNNMN NMNNMNNMNN MNNHYNKDNN KNVGKNRCNN GKKSYTTTND HKLGIKTTYA FIKNSIPFNF FHMVNNIYVT NKFKTNQWFS LNNKKEFGTN KEKPNFLTNY KIIKHPDKLE SEDCCLNDQG FIAVADGVGS WIKYGINPRK YPEKFLQLLQ KKINENENIQ IEELLNYAYI NNDKEGSTTI CLIIFNKNDN TVSTANIGDS QFL…
	PF14_0616 / PF3D7_1464900	ATP-dependent protease la, putative	MLLLRNIVIL DLKRSNKLLN INNLPKIACI LNTRKGFSVL KNERLDRLKR EVRNKPNDNF LILQFYKEAN VHNPNEVIKH YENANYIKDE SITKEYIKAL VYTNKLKYTN LDNIKYDSDH NMYNKSMHDT TTNEMHSNER SNNIYEGNNV NSENNYNNMS SNHSTHKVEY MDKKRNQHPE MYSLHIDPKK PLKVSVIDSN KKGLWNLLKS TIGFLILVAA GSVYMEGVSQ NVQKGIGVSN KKIIPVENVK VTFADVKGCD EVKQELEEII DYLKNSDKFT KIGAKLPKGI LLSGEPGTGK TLIARAIAGE ANVPFLQASG SEFEEMFVGV GARRIRELFQ AAKKHAPCIV FIDEIDAVGS KRS…
OTHERS/UNKNOWN FUNCTION
	PFA0115w / PF3D7_0102300	Plasmodium exported protein, unknown function	MMVFSSIKIFLFFIVLEILLLSDRNFIPSCYENVYSLKKVTRQNIPIRSLAQCLNTQPIS KKTSVEEKLKEKVVKENKDRNEKQTNIIDESEQENSIDLSDYTNIGSSLNPDDIDNY
	PFA0200w / PF3D7_0104000	thrombospondin-related sporozoite protein	MLMKISRYFFLLYLIKAHLDFFLRYRTGFIRSRLETYIGNSDVRYNKSFINNRLLNEHAH CDAWSEWSACSKTCDYGIKIRVKISTDQTKSKACSNITESTICHEHICPRTFEEAEETYL HNKEKEKKKKFRTTYILIFTIFSVVNIVVLLICVILSIKKKII
	PFA0340w / PF3D7_0106900	2-C-methyl-D-erythritol 4-phosphate cytidylyltransferase, putative	MHFVHTFIRCVLLIYFIKWNGYNFHMLKRQFFKNGKNIIERSIRKCKKNNFSKSYHSIVY IKNGVTQYMCKNKKRGRGEQKKNIIINNKYLFLLNNFIDKNKDKTYLSTSLERKYLKNQK DDAHKIWKNRIKNYKSINIYMSKIEEKSTKEIENKDDILNKDNINNKHIYDNNKENDIFN KYNTKQYEKIIKKKNIHSILLCGGIGKRTELIGPKQFLKLNDIPLFIYSFNLFIKCNLIK SLTLVCDKKHFSCIIHSINVYNQLLLKRKMINSFLKNGNDKLNINLKECDQDEKDNIKDF SSQKINLGENHFNDDSNIIDYIHKNTYIIYDNEKNKCILDMQELLNDLSKDIKIRKKKEI NEINEKHEKYEIHEKNEKHEKNEKNEKNEKDEK…
	PFB0075c / PF3D7_0201500	Plasmodium exported protein (hyp9), unknown function	MRSLKSCFFKHNWNICLLWIRVILSSSLLISLIFYNNVFNCKIKYGKSHTEDSFNLIKLR SLSEYNKNYDGEYYDILKLNIDNDKLKQCAMRIHPEVELIGKESECFGENMNEVYIKLIT DLKPDLINVNATSKKELLNEWDFIMNNFNGKNVEKIVEIKDETNDETDNETNDETDNETN DEKSIKKKKKKRKGKPRIRYIAEMVGYGTICIAGAPVILTLIIVGGFIWGVKGTKYARKY FNIIKKLLFTKVPF
	PFB0110w / PF3D7_0202300	Plasmodium exported protein (hyp11), unknown function	MHILLNMCFHNDICRKTKCKKQLCNIFFFFTPFLYIITLNVDDIDKKKNIFKDYIYSILL LILLWRNNYSYSDNFYVKKSIKNITREKKYMYQRIIVEREDVIWKQDFKITLNEKSYERL NLPTEKQIPYSTCSEEIEKVHNLTTRVTEIWKLLLEQMEVKYLIKTDNMNHKWRDFMWES KWALYLENVYKFINDKLNEPHVSIVEKETFIQKWFINTSHDYNYFLNFVFERWKHKVKSV CEQYEGKKYPSEDNFFKKRILKFFKRK
	PFB0120w / PF3D7_0202500	early transcribed membrane protein 2	MKLSKILYFFAALLALNFIAPRDYNSMVEAKPAKKLTPAERKKRNQNIMIYSSIASAVAL LIGGAVGLGIHLHKNNKGDNKKGTPGAKKNDNKAVNPSISSTMYRA
	PFB0194w / PF3D7_0204200	conserved Plasmodium protein, unknown function	MFILYIIFVVIPFLIFAYIIYKNVCKIINENKKRNEFFGYLNGDNKQYNLYENFTKKYEI EKYKYYLKVERGIQADYQTNILDDPNVDKYEIDKQNEQYLENILDQVYKDDKFLEDSEMN DPQKSWMRKLSNEDVVKLKVLLLKKAIYFLPVCNKIFQDKNKKGRLYNNYYMDDNMSKQL DGQCEEFLEEFNFILHEANCLSDKWGDTIISDAYRIYHHNKAKAEEEKKKKEELKNMLKK QKLKEKKLKETTEKANLLANEIIEEENSKKKKKKSK
	PFB0205c / PF3D7_0204600	conserved Plasmodium protein, unknown function	MPKRTIYMWLVFLFFFLELAKCGIPGLHKWVINNFPSCVKIVDRNKLIDWNCIGKLEKAK GKHKRNHNGGDNNGDNNGDNNYDDNYDDNNYNDGCEINRNIKNKDNTYDNNINNTYNKYD IDDDKKKSFCKGKKYKEEKIFEVDNLLFDLNQLLHKANVKFINYDNYFLKLTRLIKNVLK KFEPKKNVVFAIDGICPFSKLKLQIKRRAKSKLKNKENHLVNDITCGSIFINKISKFLVN FLKHLLSFEKYEHVKFFISTDQEVGEGELKLMNWISNYVKNIKNIKNIKINKNIQIKEDE KINNMIEIKKENIMNHLHYKQEMFNDIKNDNLKYEEKKKIRTNNKMNNSTNYDITNVEEE SFVIVGADADLLLQCLSLKNVHNIFIYTYQIFN…
	PFB0395w / PF3D7_0208800	conserved Plasmodium protein, unknown function	MKGKGSFFFCWIFLISFLYLINVIVCKQTILKLSYQINSFNSDAKKKEWTNIGSFILNSI KIYDISNTYVEEKRKFLEKMKNVELHFDYVLFQLCYDESKCLETYVNKENIKNINNFVFL LGLDNNYTPFILNYKIYNHEELYNQKINKYNNEIIYSNLFIIKFPTVSTPININNITTED IHMKPKTQKNEKINDQNQPKSFLRKYWFIILIFFLSFSFSKHLTENEPQPPDNTS
	PFB0400w / PF3D7_0208900	6-cysteine protein	MFIYLFIYLFFKMDKKRTFYYLFFFFTFLVYVLYFDNIKSVLRSSTKKKKKKKICKSTFY VHEESEEIKSWLRNSNERDKGKKFFIFERLIKERKYICVNKYKRNNKLKWIYKNTYEKTK NICDDYNILFKCIKGIIYDKNKETFFETFFENFWDNIFYMNKYIFNIYYYMFDYTKKVKK KIEGIKENMNIRHNNNYNNIFYVHKFFLFNDDEEKKKRNDDIKINIKLHNNTRKLSVSEE NVELKPYIKQGERNETVVNLYEYFTGGVKRSNNNNEIVVTSTEQFHRIVIICFKPTVKHS HIITSPHDALNHIVEENDKIKLSEEIYSIPFYPIYGNLGLKNVITTGIVEFMIPYFSRTQ MNFTVTCANGEMNDLYKFEDLIKIRIRIPRNTK…
	PFB0485c / PF3D7_0210800	conserved Plasmodium protein, unknown function	MKISFLFKLVCIYIVIIFLFQDVRCIKTKKIVRCFNPFVRTKTIKKKVQPNFLKRVALNL KIPQTINLIRGKYNLLHEIYVNKKKHIFNVIYKDIISNNKKRFLNMLKNIVKKQRSINIP LFFNKTMHSFHSNFIYYYTYFYILRTDLYLRTLKKFHNVLIGKFKINILSKVINSLSAFD KMFLWNDGRISKILHKYILKCERKLNRVADECFLNSPLCNNNTSPVKRKKRTWFCSNDNV ITYNDFNDQVETKKEKFYISAFKVLPLFFYNVFNINFYLKTIKKIRNSINTNIRLYLLKD YINDQDSIKAIFYTYKTFFQLSLEKNIVSLFRVFQDKMSIEQKFETTLINNMEKQLKIKL PNIGLTNITNLSLILFKLFANKITQVVFYLILV…
	PFB0570w / PF3D7_0212600	secreted protein altered thrombospondin repeat protein	MKKSRFLLLSIFFCFVTNISLEFKRKQKVEINSLQTNKNNDNIREEKIKGDVESQPDVDG DTCVIFSSSEGNSRNCWCPRGYILCSEEDVLDVQGKLNEIKNKHERSLVTPLWMKRLCDN SNDVGFKSMSVVIDYELAVLCKDGSNKDYADFEIIGASGYITGEEMIEEQKRNPWYVPRK CTVNNFYLCRKVENDNVNCSYTPWSDWSACKNNTQKRYRKVRRSNQNNENFCLWNDKIVP RNIMEQTRSC
	PFB0600c / PF3D7_0213200	conserved Plasmodium protein, unknown function	MNIIRNNCKQFYYLNQKRYLGNLVRGPLPTEIKKNFEYAKDFFCKRSYTYQDFKQRCESL RLFLYFGIVTFLSLDLLINPLQSSYWDKYSPSHLSRKCVVFFSNKQNDIFRHDGNLLYEK YIQLIN
	PFB0675w / PF3D7_0214800	conserved Plasmodium membrane protein, unknown function	MLELLRNAYNKCKEYILGLSKKSQIYKINILNYCLLFSFFLFYASYFFFINGIINPAVKI VFHGSIIEDKTKVYENSIIESIWLLFTKGSYFNMAMLLFFSIIIPFLKLLMVSDNFYSFI VLYKMNKKREEEKRRRRRRIRAREYNNAKYNKNRYKMNKYNRNKNINDIYKDDIYYSENI FKNDEINYINTINENEEFILKKFKILNFISRFQFVDVFISLFIVSSLNLYLLEARMLNGA YYFLNYCMLSTISSFLLFSFTSLKIHIFKNGNIKISACLNESNLEVTTSGPLSTKDLVEE EGHAQINNLIINDKNMTSGVVNDFSGNGNNVELTDDLKSGEPQNRDDIQTEETKKEKMNT RTHNDEDNTKKKNIKDKKKANGDDKVIQKCIDN…
	PFB0680w / PF3D7_0214900	rhoptry neck protein 6	MQYFFLVFLA VLAKGFLRNK EHANLINSYN DIVEDINIKK EEKSSSEPPF IPIKNKIDNV HTKNNNQYNL HNNKSNKTHL TYGTHTSFLQ NCTINDCVDV DNKDSEINNI TKEKDDNNNN NGTKQIEEKN KINKSDLHRQ NELNLQSGKN EQDINKNEKG KQDISNSNAE NKKDVKEGVK ELEEKKKEEK ISDDHKVEEN KKSDDHKVEE NKKSDDHKVE ENKKSDDHKI EEVKKVEEHE EDEEEDKKEK KSENKNKDEN KDENDEDNDE ISDEDEVDDD VEEDKNENDD IDDDKKETDK THLEEEENEI IEKEFSDKKK NGKNKDTKKE KSKDTEKEKS KDIEKEKSKD KEKEKSKDKE KEK…
	PFB0725c / PF3D7_0215900	zinc finger protein, putative	MKITSKKSFL KLYKSFYILI TYVIIVQCIY LCNKLISTFQ IKIRIISFLS FWFTKCMIIW CHIKCLCTNP GFLNETFHFV SDNTTEYDNN VQMCKKCNLL KIKRSHHCSV CDKCIMKMDH HCFWINSCVG LYNQKYFILL NFYTLLLCCN IAFILLYKII TCFKMKNRAQ KEMCIITKLD IYLIVINMIC SLLFGMFSMI MLVDQYCAIK TNTTGIELLK NIKGEVKPFQ ESLNEVFGQP FSYLWFLPVD KKLKKECFNK
	PFB0921c / PF3D7_0220200	Plasmodium exported protein, unknown function	MFIYYFKIFS FIILFYIYLL ANNNDLRKND CNYYSINFSL NIKCNRLLFQ VEKQEPNYDD IDEVALFSGV DDGRYNKKKE IKNRSPRERK IKIERERELM KEGENQLCLC CGSSYTLKRC MKRIFKPIIK FIGKCISLII SSAGLVVHAV LSGLWALLKW MYKFKIVQVV KTYVCRLIKY
	PFB0923c / PF3D7_0220300	Plasmodium exported protein, unknown function	MNMFFLFIKI FIFSIFTINL KLTNRNDYNI PYKGKKNLLG KRLGLISCRT LTEVYDAFND ATVKMLDISF DSSKASTTKT RRFIHDRYST APYELIKRKP KKKKSPFSKM KVKFVRYFQK INYILNEILY FFMDNTNCFF LPTKYILAPF VFTFKILYDI IAFIAIVFIL VIIIIYTLIK KMCLRMHYSD SMQNLRSRKN HEAKVKIYKP EA
	PFB0930w / PF3D7_0220600	Plasmodium exported protein (hyp9), unknown function	MGYSNNKFNI FTLWNNIILY FILIVTFTFY NKDLFNKYNG EKSNIGASFN FGNNRSLAEY YNNKDGYNVL RVNLDHKNLK DVLGNMHPEI KMVEVDSESV CPGTNEVNLK VVTNIPPDMI KVNATSENMS VGQWDYIMQY YGQSTPKEVS KLDSEVKDKI EKKIKKKKRK TPLIRYIAEL VGYGIIFIPG FPVLVGIVSV GFCILIFMGK KSAKNYFSTI KKWLF
	PFC0045w / PF3D7_0300900	rifin	MNIYYAKMLL FIFLINTLLL SHYENYINNL YNIRFTPNNT QQKITKSRLL TEIQNHNNTH CNNDPESKEI ISNIPLCKNY IENELKEIKI LKDQIVNNKI EQYRWRKEKS INTESNKPFL QAKMKKDKKQ LQYTSLKKEN LKTYGIILKI LQRINNFFTE IIKNIPEVEL AIGKHSISNS YIDVINNIPE LELSLGKYLD DKLRKIHNKF SKKKKK
	PFC0055w / PF3D7_0301100	Plasmodium exported protein (hyp13), unknown function	MSFSQMKILL KTIKYIFLLI LHQETLHKLN IKNNPHIIST SIRNNRSLAK YENLISRENK IYETKLRNLN KKINKNKSDM LLYNEKSDQE LKLYDIEINK YKGSNKNYKY ENHYSNNEIK SYYKKNYVHD KYIFNKKINP FLEKNKIFCK RCMKKISRSI DMFKTNFAFK FSEANSPMSL IDTISIASFT SLITFLCAFI VSGIAIGISY LLKYIFLDII IINPEIIPIF LILLFAIFIV AYLVKSKKKE KQLMDR
	PFC0080c / PF3D7_0301600	Plasmodium exported protein (hyp1), unknown function	MITKNYNISK NVIRQIGIGV NKSICFTCKN INILGKCQKI CIKHFLIFNK ILLLFILVWI FQYSNEEFTC KGSRSTKQDE EKASLRFYRL LAQSYVFNSR LDGFHNYSNA ENERMFMRNY MNDGLFKSQA YNESEKRDNL RNNIYNEQND FAKEGYSREY DSKYNSAEFG TSRKKNDGRN PFNYQSNNEN NKPASYMNED IYNKNYYNQR ENIDELNKKL HDDWSNFLNE DYSNEFESNN FNSPHYDTYK SEYDTYKSEY DTYKSQYDTY KSQYDDRNKY SYPSREGNYV PPFMDENDNR LNNNYRSGFD DTKKNNINDD KGMNFVRDEF YDEYNNNNMN TSPEYMFSQE WDNQNTHDGF PSG…
	PFC0241w / PF3D7_0305400	conserved Plasmodium protein, unknown function	MAFMFKREGC YSKNRLNEVF RKNKSFVNQL MYDLTSFHYE NYMKNKIHKN IMNNYNNIEK IQSMLNLING EKENAYKIKT GYFYFRSGVP VITPHIEQTN EFAESNNYTY NFKNIKKKYL KEVYDSYKHK IGGTDPSVPH FYKHK
	PFC0416w / PF3D7_0310000	conserved Plasmodium protein, unknown function	MHYAFFFLIY IFYIIFLPSY SRGFITPHIK RPSCVLYAVK RKKKKNPKLI HITVSSDNEI GKKGEVKQVK LSHAFNYIIP QRLGYRSTTD ELVEKEKEDN TLKYIDDIRT SFIWAYKKKL NDLNILFHFK KDQKFAVTQD DLINYLLTRG LIRENDDVYE KIESKKIKLT DFGTYPIKYT FINNISINMS IHIIKTG
	PFC0435w / PF3D7_0310400	parasite-infected erythrocyte surface protein	MKVGIIFFCL FFFVVLGACN NVKERIFKNI KKRTKFIILN EPIVDLSFSE NLFHTLLFDL DVDKNLYTLD ESLLNLENLN YSSIFRLLVD TYKNIKENED DNKNIRYIFL GTSFSRIHPL NFEYFLRKLN KYIYNGNIYE KGNVDIRGIL EEYNKEIEEK KLEKQKLNKI KDKNNNNNNN NNSKFSKDGD NEDFNNKNDL YNPSDKLYNN NDDIDVHELL EEIITKEKRF FLNDDDDNDS NDKYILKTDE VNKYKGFFIG YGFNDDIPSV IHHYNFDKNF LFPSLNSGII LDITLLKNIY EVSNILLSNN EKDQSIHIDY IYEVTKYIKE NLRVRLTHSE NVCLNEEQNI HLLDNDPNNF EIY…
	PFC0450w / PF3D7_0310800	conserved Plasmodium protein, unknown function	MSMFLNILIL IDAASVAFLL ITFLMINLNE ESLELSQAHR ENGKKALVVA IILYVIFLVL LFIYKAYKNK RKLYTNFFMK KRNAPKYVQL ASTYLSASDE YEQYELNKI
	PFC0555c / PF3D7_0313200	conserved Plasmodium protein, unknown function	MFRSKAHFLM LANLKYLELQ DLLLKRFQVF KNEEIRILKK ENMKRILYEW AKFLIKENDN TNITYIPQKV LQNNKVQDIL KNDIDCEWLV NKIHISNDEQ INIHSSNNFE EFKKKKDALH FDEYPNLFYY EYPQFPYNYY DKKKMSNFYS LIKFPYQDIL NISKNIKNMS KEEEQKKENH QINNNVSNNE ENKINQDIVH MNNNNVNYTD HSYVYAPCEM ETSKENYNQT QID
	PFC0580c / PF3D7_0313900	conserved Plasmodium protein, unknown function	MLGLKRKNVF YLLVSVPSLF AYFLKRHKDN ENNYETLINN NDIEKIKKIR IHNKCSYIPL LFLNIYDSYI YKNKILRWLY FKFRKRRKDK EEYYYITNMV RKKRREAIKY NFISDEQNLF NKFYIYEIVL EYSLKYGILS PHLSLYILKN ISEHCVNIYP SLYYYNKLDN KHNLINEKKL KYFKQINNEH TQQAPTNHTH HNNNNNNKKP LDINIHSCKN TNISSYSTYN NMEKENINIY DKYNIHNFYT EKSISYKDEN CQHITLNMIY LLNQTYDNIC RICLNTNTNI YINFYMINIL KYICYKNMEI ILLNYNHIED MKKKINQKNN TNTSLFKYIY SFFFFKKEEN HIYDLFEDQM MNH…
	PFC0590c / PF3D7_0314300	DER1-like protein, putative	MLFYKLICLF LSFIIIIIHG KDISSTKKLL KSGNLNNKIK KGRERYGGIY NSKYMTIEKR RKYNYIKKQK NNNNSYFSYC NVYKNNDVNN NYTAYNYYIN NPKNKLKEYY EKIKNHVIKK KKKIFSLKFS QNKRNEKKKK YFFINFTSFH DIKDNIKVLF NIDYIENNII YSYIKSFKRT PPITKIYLLG TFLLSVLIHM NKNVYKLILF DFNKIFKKGE IWRLFTPYLY IGNLYLQYIL MFNYLNIYMS SVEISHYKKP EDFLIFLTFG YISNLLFTIW ANMYNENIMN VKLYIHNFKN FFIKDCVSKY TSRSSTNNNS NNINSNNRSS NNNNHYNNSK NIDIKKEQYN HLGYVFSTYI LYY…
	PFC0670c / PF3D7_0315400	conserved Plasmodium protein, unknown function	MYNLNLTVLL YFSYLIYCIF VSSYSTSKSK ENGNMLLTNI LMNKNRKNEL NELNFHEVYD LKRPKGRNIK NSEMINNNNN NNNDYNNMNG GLKMRKNVNK LFNTLYPNDI NKEEKEINNY NNVKEKRSYI NNTNNINHNN NNNDDNNNNN NDMIYKNEED NLQHMNDIEN VKSINNNIQN NKTSSYEKQK TTFDIVGNNE KMKSESKFAF VNYLKDFFQN SPYVKNFQNA IEVFFNKYDQ RILESTVFFN FDETLF
	PFC0715c / PF3D7_0316400	conserved Plasmodium protein, unknown function	MNTLYIFIGI IVIILCSRFC NNVNENNIGK SHYPIFLKER FNRNNNFCSN VYNNIGRKKI KKNKNVYPHS LGYIFLPLYN KLSRSNTNNN VSRNKCLVDY VPNKKKQGGN IFLFHNVHVI NKKMKFQKNV SICAESKKRN KKRNKKRVNH VFMDKNLGDI FESNKTEGII DKNKSSNVIN NDSEYNHPNI HNNEGTYNNI DENNPMYEGM PNHLSDSNLE SAMKKAEEYI KGKEDDIIER REKEKKKKIV EKMKDDEDVF TDKLLDLRIY DMLKYVYRNN IYRTSHELVN NICMWMKSTY SNYVDTNKEI QRREKKKQEE EKKDEEEKNK KKEELINISD NEKDTKHNET NINYKRVNVN DKD…
	PFC0795w / PF3D7_0318000	conserved Plasmodium protein, unknown function	MQYLLLYILL SICSYNILSI KCFENVYKRD NINNLNFKNN NYEDDEKKYY FNPQVVYHVK GDKTKAENVD MYDNIKNKMD ILQNLNKQYN FDKIKKEYYM DGSNKKYLNN LLKKILSNAL NIPQKQINIH DINTLIKMWT NMNSKDKTYS NILNNDENYF KRYIKQNTDF ADETNKITFN NNEKEKAQIH FIDVDYFTQL TN
	PFC0850c / PF3D7_0319200	endonuclease/exonuclease/phosphatase family protein, putative	MKCQIFYKCL FVVVIFLSEY NTIMLSTRRN NHNTIKYIFN DKLNFHEKEK KSYTFPYINV IKKKRKKTQS CIFSSPIKIN FNNFVYKSRR NISSSFHNLY NTNQIDTNIN NINKKRFSDP LHFFIHSHIS QRINNNNNNN NNKYNIYNYH FSPYYYKKKN HFVTQLKAEN TYFIKELVTK HKTASQSNLD NNLILNEKKM EINIITNKEE QEEEQEGGKK KKNEEQNSKI SHNINIYDVK EDNKSKELKE QQNDIKNMNI DSIMKTKNND SNTIYYDSHR NSNILTLEEL IKTKKITNIF IINNSTENEE LNIELYFDHK ELKLLRKKEE TLNSLKNRLT LNLLKLEKKK LKRKRQHGEV KEQ…
	PFC0925w / PF3D7_0321000	conserved Plasmodium protein, unknown function	MFRYLKNFFT FIYSIILLCE YLSFIKHCIA MNLRSYRKCS LYIFNNKVDK TSSFPSCRKN CVNYINKDND LKRFMNKINK KNWLRYEKKK KENLNIKVNN SKYDKESLHM LIPMEIPIRK MNKSKSNVIE YDDINKEVSE YKKKEKNNIK QGNEKGIDNK SVCNHVIEKK DVTIEDTINN CCDVNNYNSR QNKKDEHNSC SEENVSDIDD LKEKNKNTIN TKIKKRTKEK TKKKIESNIN NNNNNNNKNN SDDDDNKNED AKRTRREEVR KKLSDLAKMR WQNEEERKKL LRSKNKFKHT EKTKKLLSYK IKLKWTDENY RKRIIEKTRI FNQDENTKRR KSILLKEKWK MKDFREKMLC NRK…
	PFD0210c / PF3D7_0404400	6-cysteine protein	MAYNIWEEYI MANFHNVYPV VTNLFLFIAL SYSFCIFVFF SFFFVKMRKV IYFFLIICLH SNVGWHPFFV FFCGVSGLYV KELQVGNYYI CNLKDYANET CTVNYDYNKM IKLLCPINKS YEEYDDRYCF KFIGIRDRLV INNQEEPIMD TLPGIIIENL NMFDRYNVGI YMPFYVKEDI TIVCTCESSK DSEAITPYLK IHVKANNSFN KEGEFIKGCD YGNNKGKHQF LTNTLKQEEN FLCEINANPG EVVGMNCINF EEYTTTTTIN NKKKKHQNKN NKNNFDVIQL RPPHCFSNVS ISMSFLRVVT MNVNNLLPEA KYYPEVYSFP KDKKFQKYST ISYLWIPENV PHDILFYCHC NFP…
	PFD0430c / PF3D7_0408700	perforin like protein 1	MKLRILKKHY YVVFILLYLY DISCFKCIRL NNRSIYKNKY KNNVHIGTNE NIRSIEKYSN VLCNSILCKN DKISSFINQR KNVDDDDESE NDDMYESTTA GSSSETDNES DEEENDSSDN NNSDEEQIEN SNNNNSDEEQ NDSSSNDNND EENEEQDDVM DNDQNDKKIK HSFNLANESK HTKEERVKEE KKLKIYDFIN DKEKRLNFNG DQKDEDNEEN DDKDENTLEN RNIISKHTSV FPGLYFIGIG YNLLFGNPLG EADSLIDPGY RAQIYLMEWA LSKEGIANDL STLQPVNGWI RKENACSRVE SITECSSISD YTKSLSAEAK VSGSYWGIAS FSASTGYSSF LHEVTKRSKK TFL…
	PFD0480w / PF3D7_0409700	conserved Plasmodium protein, unknown function	MMFFLLTLLF FYYNNFIYVD TINTSINIRK YGNFINPTFK NKRITMILGR KVYLNTLSKN NFDVIQKKLE DIGVYPSHME EMFVKGTGAG GQKVNKTNNC VIIKYKNNQN NNIIIKCHKY RCLQNNRIYA RELLYKKITS LKEKAEREII HKEEKEKRKI LRLSEKEKNE SINFKKRRSE IKKDRQKRIK YEDL
	PFD0530c / PF3D7_0410700	GTPase, putative	MLLNIFVLLV NINLLLCAQV KNFHKQKNIH CYVLPYAKKN IYPCKTKVLK KNNYLSIKNG KSKKYGCNEL FRQKGDELDE YKDNKIDDEK NDNKSNDKRN DEKNDNKTND KRNDEKNDNK TNDKRNDEKN DNKTNDKMKD EKNDNKTNDK MKDEKNDNKT NDKMKDEKNN NERNDKMKDE KNDNKTKDKI NDDIYETFDE YFNKRAEENY TKLEGEKLKI LKENIHTNKD EIRNVLKKTY KNEYNKLIKE DQEDEEVSQA VYENIKITFL MKENINNFLF TQYSYMINKL KEKSVIIKNL KKFYNQNVNP GGDSVHQNED ATKTNNVTDK DNRTHIDDSN QNNNINYHED IHNKNYINNH EET…
	PFD0760c / PF3D7_0415700	conserved Plasmodium protein, unknown function	MRLLKYGREL IVLLYVIQIF VIKSKKIFSS DKQCPHKIYP PINKELFNIK NNGYRFLRKV NFLFFKGKKN DYEMKNLENV PLFAVTNEFD EIILSFHFNN NNNNNNNNNT LYNNEKEFFD KHIKLSNEEN KLLFPMVLYN DEYRSQINVN EIYDPTNSVA IFFFDLKTAE AYRDDILYLY NKNLKEEKKT NTPFFGSKIM LTNLSYFMKI KNKYKSKINF ILIPNYEQLQ NVLKNKKVFY GTPIYYINKI KLRKSILKKK FFHFFYNDLE KKKKVQLYPN VYLTYTIEVT KDEKKNKLNE KEGNHMKNNR NNDNNDNNDN NDNNDNNDNE ETLIIQIETK DQKKYIPIFF SYEQASQFYN IFL…
	PFD0820w / PF3D7_0417000	conserved Plasmodium protein, unknown function	MNIVLQIFLV LSFYQIICFF LAHYNPYFTT NIVKCDIHII DNTKGKKNDN DKKYEQLNNV FSLNKQKILS NLNYIKEKKT LSYLLLSYNN KKKKAILKRK IKRQECYEKK YEETNKENEH RYINIYKMEN KYKNHINKNF IFLEISKEEL NMLDENLELH GSNLNLPLKN PKLSQQYDQV LFLEKNVTWY EMPTPPISCR QTGCPHTYQI CAPMYVDNNK FENTTILKII QEALNISSRK EIKFPNIDIH NSYELVYTCI CKKYAQNGFC DETIV
	PFD0835c / PF3D7_0417300	LETM1-like protein, putative	MILQEVNKKN YFYCINKYYG CVKRTFYSYK NIKFYKKNNL YINEYEKNKT ISYKDISIGI SREYFNNKRY YNKLIINNKH KVDDNVFITP TVLSKHLKSK YFSTSHETLK GVNNISTNCE NIKKKKKNEQ QKNEENKVEE KHNKENKIEE EHNKVNQLKE EHNKVNQLKE QHNKVNQLKE QHNKVNQLKE QHNKVNQLKE QHNIEFPATL KPSNINNKKG VYHEEREETI NKDHEGKIKN ANTYPHINKI EDNRNEHIDM INILKKKKII INEKETKITK FCNKSNKALK CVISILKKTS NKIKIIILQP SILKVYYENI KKNIKHTIVW VKTGILLFLT NMKISKNLII KRLKGYRLSY SEY…
	PFD1100c / PF3D7_0423300	conserved Plasmodium protein, unknown function	MRSLHLDNFK IIKTILLRKH LIVFVIINIL ILFKLNVNTT YEFSSLKRIF LDNHKINNNN SNNNNNNNNN NNNNINNDIW HTIYKIQKEK QNGYSEKKNN NIYTNIMNDK DGKIYLNTKS IINNYKEYIK NTYIYYNTFF KYVKYFITKI KNYNVIYEPY IILEQKSKTH ISINNKKLVI QFLPPINKGT HILHNKTNDS IGNVLNDFHN KLVKRRVLLA LMKRKKKDKR KSKLAKKKKL KDKKKKKKKK SKKDKQKKKK KKKKKKKKNK NIKKNKKNKL RKNKKDKYED DEYDDQVDVM YDENNERKRK RNKRRGKKNK YNTKNDKLIM EEDSLHEHDD YDENMNYHIN EDEEERRNYD HDN…
	PFE0100w / PF3D7_0502000	conserved Plasmodium protein, unknown function	MFNFRNLPLF DKDNSKDTDD IKNFINSYEG IYFSSSNKFI NVFLDKILII DPSSLNVITI NTDLYVVDFL FNEKNKNLIV LGKGKNSLIC SVYNIRECNF TLLKKIQLSK NINNIKKTLI AKCNEYIITL ENKKITFYFL NKDYSINQSE LIEDGKELIE NIYLSKNHIL LVIKNSYVYI YQLDIKNSHI SYTLIDSFNL NLSYLRESIN NKKKHINKIN DVSNNDPKKD NNEKNTSSNN ITHNNYNDIS NNNNNNNNIN GVKDHINNNT LENNDEPILS IYNEDLNVLY ICQNMYNVLF VLNLNNLSFE FILLENKIIN LFSCKFYLIL LKEVNKKFFL HIYIIYEDMK LLVSTLLLNE PIS…
	PFE0115c / PF3D7_0502300	conserved Plasmodium protein, unknown function	MGNSCKNIIR TRRENYSADI YNERFDFRKD VNCHVDKLKY FNDIYVKKKG KCDDMKRKED DKLSCSSVDD DCYLIQSNTV GYVDELYSIL GNKKRITIKK KVDDKSDMEE YLIIEKKIKV KRKKKKGKDK KYKEEIEKYI INNEKNKMSE KKRSNHKTKD KMIKCDKDNI YVEENYKIYN KSKDDHFIFP SPDKNKNINK KNNNNNNKKN KSRSHSKNTE METWCSSSND KYDIFEQDRR YLLKKRKENA DKKNNENNET ESQHDNSNDS SDKKFYKTNK KYKDPFE
	PFE0265c / PF3D7_0505400	conserved Plasmodium protein, unknown function	MKFLILLILI YYIYFSNVIK IRKNDISIIK RRTLANSVFS KKWNKTKIRQ PFFSYNFYLN KQGFLLNPYV QEKIKNQKST VLRRLKKEDN LNKLYFQNEN NTYNNKSLFD RRNKFLINKN EKCFFFFFKE EKKKSDFMKL LAKLPVITIN KKLYPKEYST DYENVLRKFD VTYINYKTRL RSKKEIDIRS IDDLYGQIYD RNILKKQFYF FLYHDDINTC YRILNENRNV LTREESFKIL NSLPYIFVNH LKYIYPTAEN VDHVLSKLLK TYIFQYANDK NIDYLNFKYK YNELDEYCKK MEQDFLMEKE KRDNERKVIQ SSLDEKLNVD VQKSDAVQNG VQKSDTLQNG VERNYNDNNS VND…
	PFE0345c / PF3D7_0507000	conserved Plasmodium protein, unknown function	MSINRINKII LCSRIELKTI DKIDFYTEAS NNIVKNFCDY FLPQLKYNNF NILYTFNKPE KNAKEKIVLF TRNGETHIIN LSLYKYSHQL YERIIYLDKK FLEKH
	PFE0405c / PF3D7_0508200	longevity-assurance (LAG1) domain protein, putative	MKLDTVFKIL LLVVIVFTIC QIRTLNELMN ILRDGDFIIL IKNILYNLII NSNYFDIKNK WLSFYRTKYL IPQVSYFIFF LISGCITYVL KYILNKISNS LGEKLIPTKK WSHRIRRIKV QRFNLMFFNL FYFSLMSIFG FVVLRHETYF PTEMGGQGKL SDYFVDYPEQ KTSNLIHLYY FLNGGYLITS VYSLLISEKL PDFYENFLQH LCAIILVYFS YSQNFIRVGA IIMLCHDICE IFSSACRVFV DTRYKFITVT SFCILFTSWG FLRLYIFVKR CILPIHRNFD IFIKYLKVET CIWLIFLLLV ILLMNTYWLI LMAKMFIHFI MSGKTEDILT RVSEMEHIEN KNKKR
	PFE0480c / PF3D7_0509700	conserved Plasmodium protein, unknown function	MENEQLNSLL FPDNTDEKDV NINVDISNKN EALENYLSLY TSQNIYDEPM NNNSNTLNNI GLNIAQNYID SDFFNNMEWN KLTKNEINNI NSLQNSNMNE LFNHESYNNG TVFEEDIAKN INGISENDYS VEKDFKYYFY CKKKKKKKIV HMNIQIKLVT FIYFLYIPVL PFYENSIRHN EQYYHVEGIK NESNQEIEEL NKSKIIKENE NVKVQEDSHI IKEIELKCID ISSISNENTE GKENASVDIL IKDSSNLKSE KNRMMYNECN LTNDFFETVN NINTEVSEKY NNLKDSCNKL LDVINKSDYE KKINDLLNFS QRNSELVDQF KQKSDECIQR CRKFETTSEN IVGECINTLA HNS…
	PFE0495w / PF3D7_0510000	conserved Plasmodium protein, unknown function	MENYIKNKNE ENLEYIKNNI GYVLAKSLLL TIKTDTQAPL SIIRKHLHNF ASFNEEKKKR KEILIKKLNS NNIKIHDEIN KNFTKKTMKD LYHFVNTEDV MDINASNEML CLMKNIFEVE NVYIGTKYIK EGKNKKKQKK ISNYKNNIVK FFNTTENCEL HNQILCNEDH INNLFIILDN KKKKKKKKKK KKFVFEKCFI FNNVIRGSYT YDSFNDNFFP LVNPFYRNED TLKRLKSNIS ARKKKTHGKE KEIKKGDHDV EKEDDDDEEK ENDDDEEKEN DDDEEKENDD DEEKENDDDE EKENDDDEEK ENDDDEEKEN DDDEEKENDD DEEKENDDDD EKANYYVEKK ESDGDIAEEK INN…
	PFE0560c / PF3D7_0511300	MORN repeat protein, putative	MKKIKDSFQL FSSKNKRDNE KNEDISNRLY KIGNEIEEKF DEDVENIRFN ADDISYYFVK NTESLNKESY KECDNKKSVN EINIYKRLQD KKIKTLFDTS ICGPYICCIF ILSKKENVNI EYIYPHIDIN EKNIILQIEN EMKIITPFNV WYRYKGEWKE DIENFLIERI FLLKEMNTST NVLYNLNIEP TSNNEYNILY GISGNRYYSI VLDYLEENIY KEIMIISQIP YYNFISWKFL TVMESFLIDK EFKKLKNFVD SFSEDNNIFE KITFDDYYLN LSNNMEQLKN MKLENILIFL KALLLEKKIV ISCSKKEMGC KYVLLFLSFI PDIINLGFNI KNYEDKFEEW KKSKLPLILF HET…
	PFE0575c / PF3D7_0511600	conserved Plasmodium protein, unknown function	MKKIYFILLI LFHLNFMECF RKYDKNKNKI LISHSINNNN NSIKNNNNNN NSIKNNNNNN NSIKNNNNNN NSFSATSFSS EKNKNKSYTN VLKKKNIYIR EESNKTTNIK EDEEKNKKIN NNDKETNYSF LSLKFFPFIL TSLLHTGINQ IPRNTEIELY EFEKSPMIRH MLVAEERKNA YTYMFFIVIS FVVVVLIALF IFKFFFNL
	PFE0710w / PF3D7_0514200	conserved Plasmodium protein, unknown function	MFLYVCVLIL LLYFVLIPLE SNFFFFFFSF FFIYINNVSI ARICSSNYKK NTYMYYRADY KSNKISEVNV EHKKRESVYK IVNNLSLKNS KWDDINSYKI NKVNNKYIYL YIHKNQKKNI FINTKKLNIL QQNIILYTLQ NNNNNNNNSY KHNKLVYYNF ILPHSRGLYN IGGHPIKNIS FQYIHAYIFQ KIKGYYYYPF MKNIKKFIYE DRNCNKNIIR MNVQKNNYNR YPNNDDKQDN NNNVGKLKYN YDLSCEFPDE IINNYKAAGF FLIKADINNN NNNNNNNNNN NYRSDRGHED NNITNNNQNN HSNNKYQHYY DNVNMKTNPK GINIKFLLGS DPLTTKDMMK IINEEEKEKK RKE…
	PFE0855c / PF3D7_0517100	conserved Plasmodium protein, unknown function	MKRLSVLFVR RLMPCVSLNK INSVYLLKHL ENVCEHICIV GKYSPAKLLR RGLHGNKMKK KKQNKEKIMN KINNGINIRE GEYTRTHIDG ENRIYNDVYN YFNKSIVLLH EFGPIGILRL LYSLLKIKDY EEKYMKRKRI YYLKYIEYYI LNISINDKIY NFWKYVTFND TVLMFKMFIK NDYFSYELLN TLYNEIKKNM DYSITSDLIV FLYAYNIYKK RRKKKIYYNV GKEICVPNTF LIMIYKKIMK NLNLSNKEIT QFIIFFSIYG YNIPLEEKIY IYNKCIKYIE QTIYMYSSNQ LKYIISSFFK IYNFIYPENN INYMEQQNRN LFTFHSFINK LFVVYNERNI DTQANDEYHI LHI…
	PFE0905w / PF3D7_0518100	RAP protein, putative	MIKFIKLKRV HINLIIILII YIASIKIYNV RKVQSINSTK HNNNIKFQSR KGNRLFYLIN KKIILKGINN ISYKIKDRNK HFYKNGKDNI LMNSFDVPYK AKERNSSHHS ISKKLSKFLN SLNFYKKGSE HENSIIKYER LSVLKCGYNK SGGNLLIKDL DNNNDLNSQR EDDICVTSGD HIMSGDNIYE NYDDSNNNND NVNKDYNNCS NNEKLNKNEK INKKRYYKFM SWNNTKEIKN FDLKKYNIHN EDKNQETPQY FQSAFYSSIK KVSEDTNHIN IKINKELVNA LSVEEILDVL NKYYNYSKYK NMKKKKKHIF NEVNIVTAYH RIAKHVRNKS FYKKKNFDQG EYSINSCFDN ITS…
	PFE1000c / PF3D7_0519900	conserved Plasmodium protein, unknown function	MYIFPLNNLS VVFVFFICVC ISFYNVRIVK GLIQYKKTKI SSINYGKGNT FSSINKNGGG RGKYSVERKL FFLNKKKIKK NKDNKKDNEG ENNSFNDNDN KNKYSWEKKI MEILPINNEM FEYYNNKCKH KYNYTNNDII EKRSLINNLI LPYREKENFI NIFLTHMDKY ILLGTLINMK NGLYDNVSYD YSQYVRKENK NNNMEKQITK NKNNNNNNNN NNNYHNEQHH NDTLNNNNVG NYKAHTLYDK IKNLKDDLKK NNQHMSDSLK VEKYINQQLI KLTQEIIKMR NEKKNEELKG NPNIEWTFFI NEKKNPLNCF VYMDVPIGTV MLKPKKVEDK NFLISINALN NIKRNNQEIL KNI…
	PFE1045c / PF3D7_0520800	conserved Plasmodium protein, unknown function	MINYINIYVI IIILCYFVEK NATIKIRRIN DYLNFIQPNI FRNITKYDLS TPFNVIREKK GRNEFPLVNN VDIGVSDINE KALYDEDTKT DDLKNIINKK DLKNYDNIND NINDKINNSI NDNINNNINN NIINNINNNI NETDNINKVD HMNYIPNDHN LSTKHSYDNN TNDDEKYLNG EILNEEEINE HMKFQQWSDR FILSKDEEYY YDIQNECVNT KYYDKINQIN DHIYKEENIM EDSSIQLMPF CNRKDKEKIC QPLTKHINEK LSYDFYTNNT TDNVNKKENH LSPKECNNNN NIFDNPNEKE NSLKKPFHQK KTTTLNEEEI NNLSIVDMTK RTNMILPLRS LLMSIYIGKE AFN…
	PFE1190c / PF3D7_0523900	conserved Plasmodium membrane protein, unknown function	MIKIRNISLN RISSIASIIC LLDCIIIPIV MFTLSVFNIF NSKLAHLHEI SDILALYIMT PICSLCILFN FIQLNNVLLL TWGIFSVILF VISHGHFNIG PKCNELLEKY HVFISILSII LLLSNNYTSQ KMIKKRNLDH CCSIKRFGKN ANNSSFTNHH SSEHACNEDH HDHHNRTISA SSNNGNKYYM NYDKNERELV SFL
	PFE1295c / PF3D7_0526000	RAP protein, putative	MGGPKIRKKF QMTLMNIIKR KYNCVNVKVE REYKKINRLM YYIQACIDEE YEKNKNLLCF NNVSYQQNNY HMLFYIHMLR ISYLLKNMTV NECKWLYIYR KITTLYFIVE QNKEKEQNKE KEQNKEKEQN KEKEQNKEKE QNNYHINVKY VNIKNNILIN NDMQNLSPHT IETKICNKYN LFTLHSNYVF VYETILNKIH NYLSIYNIDD MLLLLNICDR FFRIFLTIYN KNNNHKRMNK LNYIYIYSND YNDIHNNNDN YNNFYNYNNY YYNSNIRTKG NDNIYKQRSN HKDIFINQYD DIYYLKYHQI FINTINLMTN ILDTIHYKIL NPIQLIELIN IFYRITKKGI INEKHIIKLF HNV…
	PFE1300w / PF3D7_0526100	conserved Plasmodium membrane protein, unknown function	MKRKKNLCVR YFFVFFILII VIIHVKCNKH HISKNINNDY KENIKYNDNT AECFSYKDEE GDFFLSLSNI IVSTSYYNHD KKEEIILLNH NVKENDYDYI FIDELVSSYK MINIKCSFNI KKSFNKNKLT VLLVKEIVDK TNRKRNTMMK KDMIKFVDRN IVKDLKKEET FIFTNIIDDN NNNNMVYSNL SLLLINLIPY NGNYKMDIYI SDDNYSIKLC FLKMNFFFHN SLSLVKYPEK KMDNLIMRNI IKSIDKMSTM RIKYNKYDNI CYNNYNNTVN RYVVYNYRDY YSLPLICEET NYNIQNENNK KKMGNTFVII FMICLLFLLF VMYLYIIFIY LQYNIKNIHT QYIHYLFFIS LMS…
	PFE1375c / PF3D7_0527600	conserved Plasmodium protein, unknown function	MQSINSITNI DELLYLFDSL INDGHIITIL SIKYSLNLPS DLSQKFIQFY FERRKEELRA TYLVEGYKKD NIEYICGILN DKDISELKKD EGKFSIRLYS IQSNKSRSDL SLLWRQELNE LNKLYEKTDL KRQLIVPQFS DIILHDLKVK PSVNHSATPN IIQSYEKDIK EDNKNKPSTS ITIQIKKEIN DVNENLSNNN TNIEKPQILK QNNIYSFMEK EKNVDTYSNN TKDINESNKS SVSGSINTIN KKGNDNINKL LQTSSISYKR KMNFEDNIFK IKRENISVDS QNNDINKSPC ENSQDRNHIN NFQNNMTLNK KRIKKEIEYD QSADSFSKSS DKDLVHETFE ASKSDSKSKL FEY…
	PFE1445c / PF3D7_0529000	conserved Plasmodium protein, unknown function	MYNFLSCKKK SIILQVLLII CTYNILLNFV NIFVNNNEKN HKNKYENRIK SFYVEAYNWN FLEKWKSINT NEKLEYKINY NIGLNIDAEI GDFGDYNSDV KTDLILFKYD KDKLLSTIFI YVFSVKENKF IYHTEVSFEG KIMNVTAIDL NFDGALDVLV LFKDNKDSSK SNKYYVAAFL QNDNDQLEEI WNSKKKEQND ESITDNEEDN IYYTNIHPLI CDINNDGLPD IIGQQSGGPD GFFRFIWINT RNGFKSFLWK NINIFKYSEL DEITNPNSSA IVDINGDCKS DLVFTVYNSY EKRIGLEIWL NKIIDGKSFY VKYSQDYLLP PNSLQVLFGD FNGDGSIDLV VPTCVKSSFC NYC…
	PFE1460w / PF3D7_0529300	apicoplast TIC22 precursor	MCLLLFICLY FARGIYCLKT LNGLSRDINN SIYLRNNVHK KKRLVDCNLC MLKHKFRLSF WKKRYDERPI EEKLEVIPVF LITNYNSSPY IFQENEKQVC YMFLCPYDAE NMLNDMIKYN GMKYNGNIKI HNITMKKAYE LMKEFLQLEK MEVNKEDSKK KQNIYWKLIS SKRQLQNALY YLSFTKKSEL MYPVFYAENL YIQKDGSNII PLFFDLEDLK EAIEEQKNKA LSKVDYKIKV LNMVDLIFTE DHKKFGFVPS TQSVKYLDKL NIGTKKTYF
	PFE1595c / PF3D7_0532200	Plasmodium exported protein (PHISTc), unknown function	MIICTFLKGN FFSLICVLLF TVMIHKKKSG CQYEIHKIHN RMLSNVIEGF RNTFSNHEKK NKMKAHSCRT LNCTEQGIKP HNLRRAAKEY TPDEIRNIMC TFDKTVSKNV MYDTYYKLHD YQRKKFLRMV DEIWEFTITF AKENKISENY RSKYFWECNN ILQSNLTKMD NDDKGNFDKF LESQPDPCPT QEFVTFMDNK IKLWDEFMPK KKNDLMLILK ERLQRY
	PFE1610w / PF3D7_0532500	Plasmodium exported protein, unknown function	MNINIFNFFI FIIYLHYYNK ISSKIFCNDV KNVNQIKISN GSYRSLSDMY DMSYERRVLL KTNSYPYDDE KLSNDENVIL KRLIYTREEL KELYQNENEI NKMNSANVDK KKKKHLRKKT K
	PFE1615c / PF3D7_0532600	Plasmodium exported protein, unknown function	MNILKLYINI SVLLFFIISK YNPHNDHNNK SINSYNKINS SSTYTHSRIL KQLEFITLEE KTVNALQEML DSVEEDPSEK KCNRLLAKLK IRNEYHKHRK PHNYYARKNK KKEQKRQHLK KNKGKLNRLQ QLEEKLFTHA DLLRSAIFER TSRVPDGIFY T
	PFF0215w / PF3D7_0604400	conserved Plasmodium protein, unknown function	MNICYLFIYM LCLFMLHGEL LFFCKKHENI NKQKDLKKKE IINKIKNKTN DLRYMFDNLY VQHKNTPLYI FLKDHNEEKR HLLKVIFLYG KLHSLQGLNT PFSKFYMLYK NKKQIPSTIR LQNKIREEKK FIDNMDKSSK KKYIKNKIDE YVNLNTNVKK LYSNIEGKIN SLENFKDI
	PFF0400w / PF3D7_0608100	conserved Plasmodium protein, unknown function	MKYQLFIALI VLLNVCFSYL IKKKNIIINN NDNFYICNFV KDKKGRRKYN NNYNKKTLNG IKSIVNSGCV NQDVMRNVDE AYEGKKNLIE GNDLQKKFLQ ASKEDDYNYL YFYHIYKKMK LIKREKYIYN PTKYESVRSY IKRELKDCLD VNTSAYIFKL SEFYSKNVLE VSVYVNEIIN ILSFFTFNSE HNLKYNEKEE NQNTTNDILD YNKKYVSDDM DDNAIHSTQN NSLNNQNKAD TLVYDTTTIK DSNNNNDDDD DDDENYNYVS DNIEDEHIHT DDNKDHSDIY PDNKILLEDD KKKISNEKNF YDQEKINSII EKTKEQNNCN EQNLNDDDNI FKKYNENQSK MKFSKLINKD EKY…
	PFF0595c / PF3D7_0612200	leucine-rich repeat protein	MLLDLSNNKL KSLEDCDIIL EKLIELNLDY PSITYLNVSH NNIKSIKGLR AFENLRVLNI SHNEVISLDD DYIPCCTEKI IADHNLLTDI CFKGIEKVEE EYDEDICEEN NSYEKCNNEN VYKGNDNDND DINCNNNFYC DEDDNILCGK DIIKNKTKNY KKNNYHNEQE KRNQHNNNHE KKKVTRNRSI YDSFNSNILN EKNMYTNKNL PLNKLIYLDV SYNNIKKLTT FEKYLHIINK NKREKNDSCS DDAYMNNFIS NKTEQDVMIL FFNSLETLHL RGNQLTNLKG LSVFKNLKVL DLRSNFINHP VQLFYILDNK NWLKKYQKNK MERKDTNYYS YFVYILKKYK NFKNLQNLFL QGN…
	PFF0660w / PF3D7_0613600	conserved Plasmodium protein, unknown function	MITSSIIESF TIHFFLPFLN FVTFFLFFLF FKMEDLFFIT SKKKKLVSEK LLETTENEKD NQKEEYFCTR SKNKLIKNKN NLSSIETFTS YMSHPKRCAL NSIESDEKEN ILSIDLNNVL DTYKKTNTDT TGSDKITVLI NKEKSNNKNG HSNNKDGHSN NIYNDNIHYN NEPLLKNNEL KGALKIEFPF STPINNEKKN FIYSNNIFYK YYINNYEEEQ NGVHTNNNYN LHSNNTTNYA HEINPTIHHT HMNNINNNSN NISANIAKDV LRAWYNEQEN QNDSADSKNS NTEYIRIQKV YETNDNDMNP FFYANKDFKN NKYNHNKIDD QCVEKYNDNK INDQCVEKYN DNKIDDQCVD KYN…
	PFF0795w / PF3D7_0616400	conserved Plasmodium protein, unknown function	MPFYLSFFLL LVYNIVIKVY GCIQNFGVTK KNELLYINNK FLLCNKWFKK NKNKYKYNIN KYVNSNLYTS CSIRNKNVVY FNKDKTTIFV SLLNSPIVGI KINDDKCNED VIVQNLKDKE EKKNVKDDLK NVSNHHINNN IYSINNLPYL YNNYNLINLH HNEEPFGFSP QFNNYSMLKE KKNIYFYKHK NKLNDWLCTH YFPQNISCRY IKNVLFNFRL YDFNIKENIL YHLCLKYIYY NKNDYMSLEK KIKLLNIVDQ NKYKFILDHA RVLHKVIKKE KYKMMKHIYN EKNKERNVHN KINDETHTIP IYNIQHNNKN SYDDINYNNK IIDTYLKMRK KLNILFVTLK IEKKQNVYKI YKK…
	PFF1015w / PF3D7_0621000	conserved Plasmodium protein, unknown function	MIYSIKYHLL CFLETLKIII LNIRIKKEKG QKNKRNNNKI INNICILFKY VWVLGLLLCH KDIWIVHSYH IKNDRTRKNS YNFLKPIKYD LFTHKKNVYT SNKHNKKKTI LETFKGIIKK KYNIGSRVKE DYYDNIVENK NKISKKDVSK EINKNNNYFN NLCYSDMINK TVDEHVNFDD GIINYFVLNS NPNLSFLLNS NEKGKKIYTV NIKNKKNVSE DLENDDNKSE EETTIKNEHS KNNNNSKNNI NNKCKIKLKL KRGYMNEIYE REKKKLSIIL STLKDKSIFK KKKNKMKETI LLLNGQTVKT EVIKQYLFHK LRLEYYESIR DQKKILTLDL WSKEINMSVE NLKKLIVYIY KMK…
	PFF1090c / PF3D7_0622700	conserved Plasmodium membrane protein, unknown function	MKFFVFHLLF ILLSYNSFTY VLNKNIKTLS LSSNIYKKNL FCRKKNIRPL KIYVYPSFIK NIIKPLENAY FRNYFMYRSL ARICVSLSSA FSLGAKLYLY KKNMNSLFLT QLLMNNEILI KILKICWLYK LSHFIDKNVK LCRYLSTVFY IISIYLDIFS TYNLANNIYI YYLFYSLSSI LKSLSILTYT SIRSNINFQV YQMLTLQKKN YEKKYKISNT SHKNNTPIDR YSHSTSSTNV EHNNIHSNDN ATTIHKNNIL NESTQNGHNN IENIHLKNNV IHNTKDVHNN LDIHSEVENT DEDYKIYDNH IEKNKLSINT KNFCIGEISV IIDLLSTLVD LSTILFLFQA TKFIKQNLCF YIF…
	MAL7P1.6 / PF3D7_0702000	Plasmodium exported protein (hyp12), unknown function	MKQILLVNLF LYVILPENNV QKTSLKKQNR IFHESNLIQI RSLAEASVEK PLTHTRNKYS NEPITNSFNA SAQGSVKATT EKNGTKPISK RNEQVNNQTI NRPTYNSSLY NPKSPNDRID EGSLQNVLQG YKENHIKYAV DTLDLREDIK DKFKELLCLN VNRSDPNRQY KLYKQIKKHI QKYEDHPMIS SLVDLENIED DIYFLQNPDR AKHIVYDTAK ENRRKKKKKK LEKQKLEEEK KKKKN
	MAL7P1.23 / PF3D7_0707800	RAP protein, putative	MINFFNIVVF VLHLFYIIGI IILFLDHVQS SKLNIVYKPN GSFSKPLFIN NLFDFKEKFK NNFVKKRKKS DTNYYHDNYK RNNSNTNSNI FIESFNKKNT FIKPIYVTFQ DDMNKSVASQ NETKKKKKKK KNSEQNQLFL KSTKQKDIHE MTIDEEIENY DNIQMDEEEM NNEEDHKESD SNDKNNNDYS YDKNNNNNNN YFKNMDNSEY ELVNDYILLR KNGLTIKELM EQGKWACPKE NLKMIRERVN SKINWNYILK KNNELLKDNV DKIYHGIYKK EHVDDLLFVF DTYPYNYLNI TMSVFSLYKF ANSYLNEKKE KMNSVNEKKY NFFNNICSKD FLIKEDEKKK KDDMENINEL LNI…
	MAL7P1.31 / PF3D7_0710300	conserved Plasmodium membrane protein, unknown function	MNCFVLFVIV VALVTILDQC KQIPKFYARK FAHMLCGLLI LMFDVSINGY RRGLPHNIRN IIQTDYRVYF IYLIAITSIL RCFFYPFRFG VYKDKGIIVY NVIVSIFFFF KLPLYVLTPI FFADPMAAIV GRQFPNYAIY KKKTLHGTLT CFFVSLVTLF YVGNYWHILI LSLSLSFLEL FGGSFDNLLM CFPIFIYMTF FKV
	MAL7P1.32 / PF3D7_0710400	nucleotide excision repair protein, putative	MIHSDDSQND EEKVSYNNIL FENNTSDEID YFDDRLPHIN FYLKFQKKDF VQNFFDKVTR EQNAEKDIET LTNPYDIHEI DNEYKYEDTN MNNNINNNEG GFLLDNDEDD NNNLYIINNN NNNNNIHRDH LYLDIKDDIF HLDDQEEYTK KINENFQKNK NEFIFSIERV IENEEENIKS DKCFLCNKKK KNYNETLVHI NIYLCKECKA LDNNFRMISL TKLIKKYSLN TYDLSKYEKQ LALLSTKNPR GYMKQMKLYF IFQIKEIALR KHGSLLTVKN LYNNKLLNIN SSSSTNKINK TSKLIHKFKK TKTIYSKDVR NMEKLKIICE DNEHDFDTPV CINQNDNTYN KKCKKCSYCV EYM…
	MAL7P1.33 / PF3D7_0710500	conserved Plasmodium protein, unknown function	MILLKICLAN FFCIFISYLL LTHIENKQLK NYVLKKKFML KIVNAKNNIL SEHKKKKHPS VRNKRNLIHF NPRAFLVFDI IKIFGRLSDK ELLGHVISHN NEFIELDKKK KTKKWEILFN NDYINFDILK NFLLNNKFEW PLTVNSGQIK NQGSINIPVS PIVYVENCRK ISEQVKNKNT KINLKIINDY ISEMPISNDA IQCVFSSFSD YEELTKEQFI NKIHEWAPSD GIIDWYTFVY NLKEEPSDNI KRFFD
	MAL7P1.76 / PF3D7_0716200	conserved Plasmodium protein, unknown function	MVHVLLGYLD EKKKRKNELR DKHKINKKFV SKIGGKPFWL DRINLPDEKE FNCSVCNNMM IFLLQIYAPL DELGNCFHRC LYVFICIHCG DQAKCFRTQL PRNNPFYNYY LQDSNYVDDP TNENDELIPS DDTYNQISES DDTDNDMSDS EENIKNPTYT NNNNNNININ INSINNNNNM ININIDETNR NDDVNNGEHI DMNTNIIISN NENFNASETI NSNSNSNSNI NSNINSNSNS NSNSNSNINS NSNSNSNINS NSNNNCFEPT GNNLNESDDT TNQINESDHS TNPFNESDDT NNEHKTLEKK EKEINPYRNN NDNKKDNDVN NFIMNIKEDD ENQEKKKEKN VNVICSKRLE NDN…
	PF07_0087 / PF3D7_0721100	conserved Plasmodium protein, unknown function	MSRLFSFLFF CLIIVFFSSS FVFSRGNQIS KCVFYDKRNK DLKQVFYVPT NDVNMYKETI RKLLSREISL LEEPLNENSD SHNMSNKKNV SNFEEIKKND ENNNRKRKEM EEKLKYIEKY RNYAKGVLKN VEFKCENVDD LKSKVKCNLC VYTEIVNNKH IRQGQIIQIF MNECMYGFYY YDNINQYTQN NEYNNKSLKD YNSTQKLDDI YFNITKDISE GNVNGINFFK QQSSKYHPVC YVTE
	PF07_0089 / PF3D7_0721700	secreted ookinete protein, putative	MNKLLLFCLF LYSVVAVRPY KERYGNVSKH LDNEFKKRNP DGGKPFNLKE NINYVRKNNY ELYVDANGEL KQQNYNVNEP RQVLKKNMDK FRYLINDLEV LFGVYELNAR DKEKVLRETL KKESLCFTIA GLVSNSLNQI NVEDSPIYGL LIQGERDRNY EVNNTLDIYV ILSNISVPLG SFFFPEMKRA PYQLPYLVGH YDSRSGIKNK SISYLCPLPE FLIDVMRTTK YGLKFNFNGT DLDVKELFPV TLTNTLETAS LLPVQKEDSY KNERNVLLGI LQNISKDIPY RKVVDRGVQG NGIINPEERI LASKSFSSSR ENIKNFVSNS GKSSLDTSSM ALYFLALSQN LFERTRNAVP SSN…
	MAL7P1.119 / PF3D7_0722200	rhoptry-associated leucine zipper-like protein 1	MNFFFFFIIV YCFISSFYLI KSSSNDKNKI NKNNMPLQRG ASNLKDINIH NVEKKSNMES VNNNINNTTC SKNLNANKVP NVAHTGVNKK GETKNEEVEK EENENEEIEK EEIENEENQQ NEEDENEENQ QNEEDENEEN QQMNVNVDVS AEKKNKELPE EKKELQKNSE KNINKEVIKD SNKDNTFNFH KNINTSFNKN KNIYNNNNNN NNNNKTFIEK KEEAIDMKKT HCSNNNKMCK YNNMNNHMST NKNNNQIFEE SKQNVNKPIY NLKSLGNNTF KNDEKYNEND YKNNHDDDKK KYTDDSNEEN IYEERNQKIL LIHLLKNIKE LLNRQRQNFN NFLSFLSENY QSYEKFYKSQ KYQ…
	PF07_0100 / PF3D7_0723700	conserved Plasmodium protein, unknown function	MIELFLTTNK KKRKKKFVIL FLYIILSSVI QICLTYRLGR KNMLHYLINY IDKNDLLLYN INRKKKRGKN EYFINVPKRN LQKLWKGRNK NLSLHNNNMN SGELADVKNE KKKMINIIKE CVDNLLFINR YLVEEMLEDD NKKYEQENRE NNNNNNNVEK DIQVDVTNNL LSKDNYFIDK KKKNIINSYI EEMDKFLETY DFNENKEEIL NYEKYISNVI VYNTVIINNN HVNQKNYMDR VIFNYINLVL LSKAGTMEDR GGNTCHVENI HDEENICDKN NICDKDNICD KENICDKENI CDKENICDNI CDNIYDNICD NIYHKEDIIT SKCSNNIYNI EHICKKLVMI KKAVIYLMKK YNI…
	MAL7P1.141 / PF3D7_0725400	conserved Plasmodium protein, unknown function	MCFLKYFIFS LIWIFLYNEK AKDNSFLMNH NKREYNVPNG RILRLDTPEP WGDSETYEVV TKDKHGNLIT TVFNKNAEAL YFYINKKKPK EKNSSKPKNS KMRKKGQNN
	PF07_0109 / PF3D7_0726700	conserved Plasmodium protein, unknown function	MKIFLLCFAL LFVPYKCLII TLKNDNTFFV FPNIMKNNRN LSKRNFTTYM KRLRNASVEI DLVNRKDLTK VEVIKMFLKG VKECKNVEYL KEKHKGHVPP TTKRKLMKQK RMINLRAQIK NTRLKKQEQV PEDKNILNFP EDQLKNINAA VLYFRKYFEK YENNNDSNDI
	MAL7P1.149 / PF3D7_0727100	conserved Plasmodium protein, unknown function	MKRIILFFLI IWAINIKRYI NYNIKIKLKT FTNKIFMSGR VQLKSTKLQH RKRPRKRKKS SIYPTPVLYH PRQRDYFNLQ GEYTCLPSED ILNLLSQNKL YLLIQSIRNK NNDAINKILY KDVNNIYIDK NHIYYDDKNV QAKENGNIKT ETQKGTQKGT QKGTHNSRDI NHLYDREKKT CRNFIKFSNF NKYYNEKNNY TNEDIINIDN DDNNNNDNNN NNNNDNDNNN NNNDNNNNNN DNNNNNEEQE KGKDNTFVDI NNIYFYFKKV NITNINKDNI NDDIYKELLQ LKKISLQNQD EIGYNIYKYF LNIITNVERE KYMDDFFLVK YINNIWINKN VHKYFYFLNS LYDRMRKISY KLF…
	PF07_0113 / PF3D7_0727500	conserved Plasmodium protein, unknown function	MNINVFFIIL ILIHVSTHIY YIRCVKVICN NNFLTKWNNR SSIKNKGCKS KIYGNIYKNK NKKIYSNIYI DIYNNLCKNL YTKRNIYLCY NKKRKIQKKK KCAHINDIEE IRKKDINEYI SKFNFFKLYY YNTYNCLNKK CVSFISCYKR DFCYKKLLNK RICHLFEKNN NDKYIKNLKS LKKIDNTILG KKFDGKEEEI IHEIPEKFLN SFKWALEYRL KNTNCNFMRR LKVSRKTNEP LKSLENYAVG YKENLLAMLQ KEKNFFLNVI QKLKSKEYFN FDIYSIFKFL TIDIRFLFYP SCHDESAIFY LIFGNLEKSV NFFLKNKHTV DFSLIQNEKN QNHRNTYTNI MLQPVKVNYV FVN…
	MAL7P1.163 / PF3D7_0730000	conserved Plasmodium protein, unknown function	MTTVLTLILP LINMNKFVKE IKTFKRTILL KGSPAFKISV WFSGITVGLV WILFSEYNEP KNNNLFFKKK KADIFTNEEI ERWNKPYISN ANNNSVIRNS NLTADEKRKQ LLKEIK
	MAL7P1.178 / PF3D7_0731800	alpha/beta hydrolase, putative	MSIYFWITYC IFVCVIYYEN TFLHKTQLSS ILGYQGIDKI LLLGKVDMAN ILNEKLYNSR KYMHKISRGV LYSDDDNTVD DYKDYKNKDV KSNKENNNIS GNKENHGNEN NIIMEDGNPE ISFFTNRENL KIAKYCWKPK EEKTKAYIFA LHGVTTHLRN QYLNYHGRPE WANKNEMTMK ECSINHNNKL RNSSSQSNNI SDEKTENCCK SKDNISNKIN DENNVNKNIN SENVSNKKDF RKPMDDNNVL LFTESDKDND VYKNLYYCSK CGLSKYCNCG KRTMSYENSW IQSLNVNGYT FCGIDNQSHG LSEASRNERC FVEDFENFVA DAVQALEIFV NEWKAKNELK PIILMGTSMG GCI…
	PF08_0001 / PF3D7_0830900	Plasmodium exported protein, unknown function	MLSFNVIYIT CVVVIFSLQY NNKVNLHNKV HNIYKTRYSL IIYFKRLLIE YNETVQLEKN PDENSSTELD DNESTVSVEE CEKSLKEFFD DCKRENYPGN VIHLCDNVEE PEEIKKGGSK TNLLLEEYGD PVVYDKEEMK LISELLDSYL EDERHLCMIK RILDYTKIYR NPLLLARYRI KKFLKRRCKK IK
	PF08_0004 / PF3D7_0830400	conserved Plasmodium protein, unknown function	MKNKLSTLFF ITIFLILIFI DSAKGDERKN FWKSRFTAGR GNITNKPTEV NHPIKKEGEN FLSVGKGDHD ESRVMLLKEL YQKDNELNIV RKKHKKYKSI TVALASIIGM MLLRNIGSLL YDTVTRLNQK SNRVWML
	MAL8P1.18 / PF3D7_0827600	conserved Plasmodium protein, unknown function	MIFLILSIIL FLLTYECKTI KKYFYVNNNI NLLKDKKKNI TYRLRRNKRI YENGNDLFEY FITLKNEELE MHKEEKKKKN PHAVSYIQKL PKKKHLLRRW KYDLFEKIKE KMKYEDETKR TTKLCRHKFK LPIDFFKLGD QVRAKVVHVQ NHLIKVDINF IQLAHLYIKR YFNEKAELKK KYEIGKYIDV VICYIHKKNN IIQVTDNEEE IKMLKFNLNK LREVGYLKRN YQHEKGEQKY DDKTYDDKTY DDKTYDDKTY DDKTYGDSEK YDEGEHFEGD ENYKVKEKYN DYIECDDDNE CDDDNECDDD NECDDYKDDE DIANNLTNTY QQSHVPNMTY QQNIYKHNKN EEKIDEIKEK LGL…
	PF08_0015 / PF3D7_0827400	conserved Plasmodium protein, unknown function	MRKESFLFFI CTLNLLINSF FCYGGKVKKN KHLRNLLKTL TDRIETNDGE NEYARLTQTP VINMNLEKTI FKTSLQDILV EPYAEKIKEI ISKNNYEISK EKENLDEIRY YNDNLDKINN ILIERENEKK KKKRKNIQLE NKLRNKYFHY LQDQDYGFSI FPVYKTFESN PLHFDNNIIS SLLPHELLDK GILLNKQILE NSEKILHYPE RGDTLYEI
	PF08_0016 / PF3D7_0827300	conserved Plasmodium protein, unknown function	MVLPLLFINY KNNKYKNEYA YKHVVKCYNL PEFMYEGFFE FLIKKYNNED LYKIDEIIKP SYEETKLYPL KIICNKNLGN FLIKKEKILV VDDIMENNKV YIKIDNDKNE YNNNDDVIYD NIHINVEDKK ECIQKVSFEN NMYIDQGKKT KTEDKQYINN NIFNDLVDNS NVTLKEDNNV TSGDYAYINV HNCVNDENYM MNKRNVQSIE RDINKNKKEV QYCEYVDDEM NNLPHNNNNK KNNNNNNNNN NNNDNIYENK YDYYSCCYSD QFDESDSDYS VICAHNNNNN IITCHETCSY NDEHQKYKNK NVKYIEDENN NTGDYASNTS ETKSGYSSYK YNNIINYKNN QKNNKKCKKI FYI…
	MAL8P1.26 / PF3D7_0825300	conserved protein, unknown function	MSKKKKNSKN KNINKYFNPK IVTAILLCSC YFLYNTFGSV YIIIVLIAII FLNLDNNNDS SISAYSIFNK GKRYLIGDLR MNQIENELRN TKYKNNDSED NFLRYDDIDK NKFYIKGSSK YNNKLCTCGS KKKFKKCCGI IKNSSSDF
	MAL8P1.45 / PF3D7_0822700	conserved Plasmodium protein, unknown function	MYNHFLYFPF EKFLFIFILV VWLAFQTNKR PSYITKKYKI DDVKNIDMII QHDIVINTQN IMCIFYILYI NNLDKNKNFI QYKNFKKNKS YKYKNNNNNI IIINSHSHSN SHSNSHSHSN SHSNSHSHSN SHSNSHSHSN SHSHSHSNSH SNSHSHSSTQ NSLYHDTNQA NFLKPTSFFL YKHHVYFNQK YKKDPNILNK LKVPRNHIFH INKCDLNYYI QNYEFFFFFP DYYEYSHLYI RLDKLFYFQR CGCDTNIKKT KKRNQNIFNN MLGMKEKDTY LQNEICDIYW NYLKDDNTYD KYNFSIINYI KNIIKKMYRY LYIYKVFVLK QFYRIVYYNQ GIRNFYYMLF SYIYNKGSII YNY…
	MAL8P1.55 / PF3D7_0820800	conserved Plasmodium protein, unknown function	MYLSLLSFFL VFFYIIFLNP ILSKKVYLNN NILYISSLKK LCLGKCKKRS YSIIVHSNNN NNNHNNNNNY EGDPQNWKEQ DLKITNFEKE DIKINKHLNV NIFRTEKNTS IYDEGLCIYN ILKDIEIKDV KRVPCFDPNL ADITIEQTKN NNNNNNNSSG SSSSSSSSSS SSSSNIGVKK NESGDDIYTL RSNKKNSYLE NTLIYKDTNY ELPYVLNYYP DDMFIFNFDG VINLNKQEKI VVAFLTFLKI FNQPFVFNNK KVNNLMLYEF LEKEANHIFQ DKDQTVQNND NSNICNNNNE GDGERDPFIL HKLMPKFFYT RLLHIYKYLK RNEDLVIVIK YIYDEINNIC VKYNYDINEL ITL…
	MAL8P1.59 / PF3D7_0820100	conserved Plasmodium protein, unknown function	MIFLYFPFVL LLCTFLINFA KCKYIIFNED KYLRNSSFSY HSNSLFKVRK YFHNFILSNN YFSKKKSKQC KSFNHELNKE NELKGEEDTF FLFPENILDE DKSYLPFDKE KIMASIKKHK KEDDNIKNIL KKTKKHCNYL TNKLGRLNKK LREIKKLETV FYANPNILTE EQKVKLSKKD QVKNEIVIIN RYRKKYISYK RNLQKNVDDT SPFFYNKKKK KEKKKFCTPE EFREILKSND PKGTIQKIKK IDLNKIPRNV TDFLVFNKVG TKEEVKILFG LKAIKINGNT IDDENYILNI KEDEVKVFDQ IVHIHEDHYA IRKRFTTKQK QILNKKKKET ITEAKKEVKE VEKFFGINI
	MAL8P1.61 / PF3D7_0819700	conserved Plasmodium protein, unknown function	MKNFCLTKGK VKNVINYAIL LCIYIIIWIL LTLYCLFNKL KSYIISLQLI CKYIIIQIVK CNNVNDLNLN NLKNKSNKNF QFLKNKIYNI FYNCLSRKNE KHDDIFKIYK NINKVPKHIY IVFKISDLII LNSEKLINHI VNILIYLYEF KIEHVTIYVS DHFFDYIFYY DLFKYLYKKN FYMKCVIKEN NISNNNNNFI SSNDKCNKKN YFSCNYNNHI YDTNKSFQCY HHTDEFVITK FSLPQNIPPQ ENSSPELFYR KRKNKEKMNS NKNKKGNYKD DHMNSYKDDH MNSYKDDHMN SYKDDHMNSY KDDHMNSYKD DHMNSYKDDH MNSYKDDHMN SYKDDHMNSY KDDHMNSYKD DHM…
	MAL8P1.73 / PF3D7_0817700	rhoptry neck protein 5, putative	MLKYTLLIYI IAGYFISEIS NKLFDTLLPR NVFKKPKPFK KNEIKKGIDK DEKSIMKNVD SIDVMFEPRV KRFVPSRTRK THVVGGLSQS IPDPGDVEKS KYEKAVRFFE NIKNEMINMS SKINKQLDSQ DISSLNNFKR ASEVLKESLA TMHSLDIIRN DGSVDFSKYT LDWYSKANMR EKYSIEKSIQ KIMNKLFKKA RKKKKNMKKK KIDANIEQLE MDLLVQKFIT ENLNASKLLK LYDDSANDYV SPMHTDVCGQ LGSIIFSYMF EKAYKSSINH DISYFQKYLP RLKYRIQNMI QKGTLLLLEK GLDDSLYTFK SKISDIMEKK FGFNDMCTDK CMDETIKADY DLSEYKNEFS PSK…
	PF08_0063 / PF3D7_0816600	ClpB protein, putative	MVNSFFFCFV IIGLIYVWDI TYSKKAKIFF NKNDIFSIKN THWDIYDKKK YFFIGNNHLK NEESFLPEVR KDYKSQIKEY KNSTNGIIYH NNKNRLSYTI NDQVNYDNNM TSGINKKRKV KDSSIHMNNS YEKNRNKNKF ALFMSDEEYT INSDDYTEKA WEAISSLNKI GEKYDSAYVE AEMLLLALLN DSPDGLAERI LKESGIDTQL LVQEIDDYLK KQPKMPSGFG EQKILGRTLQ TVLSTSKRLK KEFNDEYISI EHLLLSIISE DSKFTRPWLL KYNVNYEKVK KAVEKIRGKK KVTSKTPEMT YQALEKYSRD LTALARAGKL DPVIGRDNEI RRAIQILSRR TKNNPILLGD PGV…
	MAL8P1.86 / PF3D7_0815000	selenoprotein	MILKKVYILI ILILLSILSR TVDSGUSKQL HIKLPDEDDD YLAKLIGVFN DICTYSINNK EKIAKILSTS AVSVYTITSL YNSGITFKKN PHYSFFLPSQ KYILKIINNN VNIQNNDIKK IDNLKDIPIF ERTFTNKHNI QMSKTYILNN FINFINFLPY KLKKESLYNF SKYKEFDGLK YVENPFTQVQ VLNHEDNIIV YQAKTKKHYW IHLPFKYNII KISDDNTTSY ILMFIPLYKY YSNYIIQMKI TSNNNNQNVT FSSCIKQEKT EHIQNNSFHY DIIKNISKHI TYDIINAIDN NINILYMRNV KPGKYNFINT TNALQKKTKN YKKKKFTLPS FKSLPFKFKR T
	MAL8P1.101 / PF3D7_0811900	RNA binding protein, putative	MFLELYFYLI LCCYISFNSS LQVKKNNQYF LNSSYNRKGT SRPSRRKKNS FINKLFLAEH VNTKKSTFRC YQQCKHKKNV ESGNDYMCDG VKKKRKKSGN NKKSDICHYD EDEEGIIAKP YYDDYHRENR NDIQYDINED NNYEESDEDE LEEDEYEEEL EEDEYDEESD QDEYDEESDQ DEYDEESDQD EYDEESDQDG YDEESNEDDL DEHLKERLMK RKSFYSKLFN IDDNEDKFNV LSPKYNMNIY NILEKNYDQN EENQIVLTIK NLNYEINNRK LITNLNLQLN KTECIGLIGN NGCGKTTLLN LIYENSDNKL KSFTLNNNIK KKEDAVSLNK FNLNTLSSSV KKNDFTLLYK ILS…
	PF08_0101 / PF3D7_0809400	conserved Plasmodium protein, unknown function	MRVTNKFSLI SLECLQVNLL IPFYKKKTKR IDNHFFLFKR FNSFDKIHSL DKNCNNLSFE YKNNINHIDD KNELNHNFIG KKTNFLNKQT SENKKKVLQN KNDDKYKDFH SANENDDDKF SNNFFFCDDT HEFKNNQINE ISTDNTYEYT NDEYNEDIDD DLDTLLLTNN LNSSLIGELW HASANSIYKN NKKLDIHDEK KNKNQINHID ETSTNIIKQI DNCVHTNINV PQTHDKQKCK ENFSNSFVNE IYEKEEKETQ KMKEYLEQHE EHFSTFRNSI LCKLRIAEEL SRNTNHSSKE NINKYNKNKE EYYKNLIDSI NNTNNPIINV NNNHYHNKKK KKNYNYYPVN NNINYDHVET IKI…
	MAL8P1.124 / PF3D7_0808000	conserved Plasmodium protein, unknown function	MKISNYIFGR IIDCYSYVDK IKTHVEFNRI KKYFQDAHIL DKYLNNYKSK IEYYRGKIKE NVHSILRNNY ICFEKNVDED LIFVNRYVYY EIKNEDCIMI CRKRLKRNFF KKKREYIGKK KDYIENKNIY DYYDYYDYYD YNSLEELKKR KYISRYTSEV VVIFPSYFFI KHFKILRDFI FFFIIERNNS PLNFCYIFKG TFRIYDRYIK EKITKNKIPC ILENICNEQL VLKNQLNKKK RRNKKLTNIE LYNDIHLNVE QNKNVHYNNM CCNYDIYKKY FINKKNNMFR CSNFILPIIN KCIFLKGGIL NVEFLKFSKK DIFFFTTHIN KKYRCNQLFL NGPKCFKILI YEEKEEEYFL NLY…
	PF08_0112 / PF3D7_0806900	conserved Plasmodium protein, unknown function	MRQGLCKRLV LLVSLNILIF IMVNYNFCSF GFIINRNEVM KGSSIIIDNM KKKQSREKRK NIGFVNCFIL RNNKIRWGKK EENNKKINIK RIFLFDRSVD KVSGHFLQDR GLFIEADKKM KIIEEIEKMT KLEYKNVEKY LNVLSENDVY EEVINHKFYM YKKNNEKEKH DRLIKIQEFL NPFIINLRKK KAKEKVEYLI ACIIKGVNID EVITEMFKRK MIDIYVLTFI DDKIMEAHTK LLKDDKLNNK DEQMSISEKI LRTLKDRIIA QQKLNKKGTF VFTRLLFLSS TLDINEDRKS MIKSMINTIE QLEEFELYLL DALEYAHEND KLQKYIPHME LLLNACKQVN PVYNQTLNKQ SEN…
	PF08_0137 / PF3D7_0801000	Plasmodium exported protein (PHISTc), unknown function	MIFVKSKILY FLKWPSVAIE ENFSGSFKCL FKNKRNKYVR NNLSRFILSV SLILFFFHFV LCSTIENVEI LKNDYNTLTE SHNIINRRSR NLGANPESIS LGYELSEKDE GNKNDLINSA TDVSTELENL KERLFPELEL YTNDQNSRNN TPNLRKGSLG FDSFKKLELG TLNQFDKDKM INLKDETNMN EFEGFLGRNS MASNVVTSEL FDEPVDDSSS TTTSTGTKLQ NVPSNDNNGE LLKDEPIDDY INNNSKVESE DNYYAQQNMQ SQSKDNYASE QNVADQSTDN YPTQHDVPVQ LRDNYASEQE YFDRGEQLND VSADNNTSNK LKDEPVDNNT SNKLKDEPVD NNTSNKLKDE PVD…
	MAL8P1.161 / PF3D7_0800800	Plasmodium exported protein (hyp7), unknown function	MYFFFYKTII YYILISISLK YNNCNIKNNP KQHDIYNVIK FRSLSSHYSS GIKKKKKFLF KNKLTKKNVK KTEFIEGTFV IDCSGLNNLI KKTSYEKYNM EIRDSMFKEY EKMYSELYDK EMGKKEKENL LKKFVSLLHR IPSKYIDKML NYLMQDFLSV PIYVIILFII GSVTCTCACV SMVYSTIACS YALVPIFALL LYLKASESY
	MAL8P1.163 / PF3D7_0800600	Plasmodium exported protein (PHISTa), unknown function	MKNTGSNFIL KFFLFKCIFV VIIGILCMGI LYLPNDRNNK VSSIKSSEKY QRKLYDLQRI VKGRKKDSKL KNKSEGTNEQ QNNKNNGNIV KNEELLSRSN KKCLKVDLNR EKLLKYFSSD KENIKDKDIN YNDLTNNLNR KELLAVLETI NEKTPRNDLI NIWSHVVGIN RGEIDELTDK LIAYTEYYIN KHNKHDININ EMKTFLNINS KGWNDFKIEC VKKIACEDSV FSQRFYKILK KGKKIEEIKK LIKSYIEYAD AIKKKEYENY IERFHESFEK YVNSSRKKKK L
	PFI0095c / PF3D7_0902000	serine/threonine protein kinase, FIKK family	MLILMRMLIF ASLIIVFINV ENKAIGNLNL VNVNVRSLCA KNEKFVAKKK KKKSIFTKIR VKGSKTLEGF LCDTLNGIIF KSTKEKSDNE SIDKDSDESI SYMEEIDVNN EEDNNVNLCR YNNMIDNNSI NVLENVNNPP KVIYNWKLGK DSLLKMLCMS KDYSINGVNY ENWKLSPIDF GDMDDISKKK KKNMYKSIIC SPKGNSINNT KVFIKKINIK DWLKLFNCME KYDGEYMYTK DNFVMEAVAL SFLEEYHKGI TPKLHKILFE PDDNEFYENV SSDYMFSSLD NFNKILSNGL EKNLDGNIVI VSELYGDDIK NYKKKMRKVY PKVFNKKSKK KILFECLKLI DKLHDTGLSH LDF…
	PFI0140w / PF3D7_0902900	conserved Plasmodium protein, unknown function	MKNSQNFTFI IILLISLIFI SSCSNTNENY KTKNIDPRIL QLTTEIERTN KKFDIIRSLI LSGTLFLSLT AMTGIAVHDY YQFLKHTKNI RDAEVNTIYK GI
	PFI0185w / PF3D7_0903800	LCCL domain-containing protein	MYNFFLSIIC IFFIPYFCRA SFKEYLSNKK IFLKYNGTYC LYPENVIEND IIEIATDECD KVAHEYENKI VWFSFDNGRL RSNNGMCLKT YKNILVLSTC SPNKNEKSEM WKIDEETHLK NENNNCAQIA GNKLFSFTCN NLSTKEFEQS IFSSDELYLM KTRYSQQKLK NIKTEDIDTF HNNFNTLTNS YKEVDTKIVH ILNRDKEMKK QKEKILHLIN DMKLLVNTSS SLNEYGTGAI MKIYDNMDIE QKKYLLNVPL EKLEINEEKL DELGIEQGQI KIIIQSFLNV PENNTYTFYV KNIVGYINIK LNNEEILSNR NIEINNRTNN SAVVKLRKNK LIPIYIEISS IGNEKPSFSL YWS…
	PFI0205w / PF3D7_0904200	conserved Plasmodium protein, unknown function	MNYLKLFLFL FLVNILNIYG TPLFYNKNLE KWNKELLKIS KKEYNSLNEL NELTDRKNCG KSLKHLAGLI LDKSDKEAKL IIEGSIIFNK LILKLGNIKE KEIKVNDIIL PIETLSNKCI NIRVAKSNDS TILCLANKVL RNFWANSITD AVLCNMTNVQ GKLPEYDYTK NDNDNDKDND EDNDEDNDED NEMDMKEKEA NSQNTKVKKI NEKKKKIINE EFDDEQEKEQ KGLKLRIAKS KYGQPNIKIN EKSLEDIKKD QLLKNSSRNE QEAINLQKEN SEEDSEKYSD ME
	PFI0210c / PF3D7_0904300	conserved Plasmodium protein, unknown function	MSCINKLPLF IILIIYETLN KNWGAKNYYS QLNKGIYPRL LNVKCRAGES LTYDYKCDKC KEGFFNFSRD NKKCSPCPIG TFSSYVGSII CENCPYGSTT KSIGSKSISD CVCNKGFKLS SYLNGGNKCV PCNSQEYCKS NENTWCFRNM CLKDKNKENI KLCKKVKKKS IYNYEILCFK KGVCLNVKEK NSCLEGNKMI QCKICDENYR YNFLAPLQQP CVLCNMSTYF IIFFFAIFIF VISIFIAMCI NNEKEKSIIQ LFFTYIQFVS LLRYVNSNYD HYLVKFLYFF TFGIPINEFL DCVFKRGSNL ERIQKKITFL LYLPLLILIC SLLCTFVITL FYKNVKRRED VTICPFDKNY KQR…
	PFI0305c / PF3D7_0906200	conserved Plasmodium protein, unknown function	MNLREYIYIF FILYFIPVNK ICVAYNVEKN KRTILSNCRN VLYPHGKGSL YYTRRKYLFI KRKKENDMKY KKNKIGEKKD LLKNRRNNMY GSILENNNVG FLSGIKQKVG SFIFGSNQNI IEKLKNLNEK KSIWFFTGYA RNIFQPNSLY NILAFEEIEE IDYKKWSKEN KINFDYILNR KLEPGKDDTI NKTLCVNVYK VKKYVIFYKN EENMNKTKAN NNNNNNNNNN SNNNNNSNNN NNSNNNNNKC NDSYKEKEIN IIHNNNSYNS YHCSEHKNDF ILCTYIYLMF YIYDKEKKKS YIFSNNIQNN KNCIYQIVEV NKEQYPNLFD NIIMNQDILK KHINIIALEK SNTTYENIIH FIG…
	PFI0390c / PF3D7_0908100	conserved Plasmodium membrane protein, unknown function	MNTHFLLWLI LLICYKNVEC VRKNTFYEKY KPLNFVNNYN KQIYKCYGKI AQKRIIRGNK FVVHFYNKKN NILYEIKKKL VSLGYEHLKI PLKSIFGLFN IFGFMFLLNH YNFINDNHSK SLIEITDKIN TKIFLFNTIN DVIRKLPEER HTIWKVALFA LGHFSFQLII SNVTSFLFSF FTSHEINKNE RGKELKNIND DYKDEENFMN KEKIYKEMDK KENIHSNYNL KDVLKNKMLK SMCILNHTGF IPMYIFNYIL NKFKFIDNNI TIFINFYHLL YGIMSKIYIH FYIKNKENIL FSFNKLKYMD LIKNTFFNTY SLFISISLFL KYFKNVYTIY EQHYKPILTT FHSILIPSIL IIL…
	PFI0405w / PF3D7_0908400	conserved Plasmodium protein, unknown function	MKTEQEKKDI NMKYANYLKL NEDAKQWIYN KIDKNEIFSI KGQYESFVKN YEDRKKDVSN KYNVNKYLNF MTSFFLLCLI ILDFFINLFK VTIKNLKYFL KNPVYFIYTC KCFIKSTTSN FFKFIQLYKH LILKTFLFLL KEKKKIAKEI KDLFSFCFKV LYFYVYKYIQ SLYQYLYIKY CELFKPTKNF KVAFT
	PFI0490c / PF3D7_0910100	Ran-binding protein, putative	MSESELQQLQ VLCEAMYCGN KEEQNQAHTI LLPLVNNVMN VSKLKNILGS TNHVHTLIFT TSGLLQLITN EWNKIDQKEK DELKEFVISY LYNKGVDLLN LSTNILGNFV RLYVRIVKLS WLENTNYSLI TKQVEYFLNS VTSHWIIGLY IYAALIEDMH PQCGVNSAKS RRCAISFRDY VLKDIFKVGI ETLEEFVKGS IRIELRIEEN RLLIKVLELI YNSLSFDFMG TMINDESSDE NISLMIPQSW DIFNEKNIPK LFFDMYELCM SEEDDIRNCC GKYCLRSLIL LGSLRKTFFT NEKQKVHYMN EFLGGINKII EKKIGLNDED CFHEMCRLIG KIDTSVRLQE LSTYSNFLSW CHN…
	PFI0990c / PF3D7_0920200	CS-domain containing protein, conserved in Apicomplexa	MFIWSMVINI SILIYIQTLK CVMLIRKNRN KRLPSYNILF ASKDLKKKKY NSLSLGFIRN VFPFYDKKKR GNKSFELFRG FGATCSYEWI ECDENVEVKI RISPDINSDD IQYNIKSNYI YFKIRNKPKS LIEGKLKGSV DVNFSTWFLE KQKDCNILNI VLKKKSRGIN EWVGVVEKEN IVHVSYDNLS SSSTSSNISY MPSPTNNNNE NNNENNNENN NENNNENNNE NNNNNCSNSY LSNELLYSQY FENAKFNDIF DFLINWASKK SSSQKEFGIP ILKLKTNVIK NEDSIEIILT GYDSLKWEAE DSIIFKLGNI NKGVSLNIYR GNIASGLKGT YGSMISYLVQ ESEERIIRKL QHD…
	PFI1010w / PF3D7_0920600	conserved Plasmodium protein, unknown function	MIKCIQLYVI TVCILLINIA CKKYRDNSYA GYIRNNIHNA HRTRKKIYRR YAQKKKEKET YEEYFKELDK IFNECDYDAE QVEEEEKKKE EELNLITEKD LLEINFCNYE KDPRSLANLV KEKSEEEIEK ENNENNEKNI EHIENIENIE NIENNENIKN NTLEYSYDYD RILKKKKFLK EKIEYKDKFI LNENHNKLVN NIDTSFMNDF LNNYNNDFNK PFYKARRDQY FAREDLVKHE INNNNQSEYK EERNNSENNN NNNNHILYDE ERKSDLHYHK VSKDDQNNED MLKENLESVL FLKRIRNNFD IKRNIYINET INDIKEKYNN NEDKTNRWHN IKNEDSHKER DEENRFHEYV EEK…
	PFI1065c / PF3D7_0921700	conserved Plasmodium protein, unknown function	MDLKKCVINL ILLFYINKFI CYFCFTHNSF GSKNNCFFFL NKNNYIKNIN IIDRVKKLSN FELHLIFRKL KDQSMVKSIP GHVRRKKKKK KKKKKGKQDE EPKKKVNKKL ARRKLLKFYK LKRKNEGKEE NVFDDKEKYS VFDYIEEKMK NPSNNSFNNK VDINMKENDP LFNEGKKKEN ILLGEKKEEQ QEQQKYILEE QQKYILEEQK KYILEEQQNY ILEEPENITS DNDIRNNENT EDDKYNDLEN VEKKDVETLS KKEEGKTTKK KKKLKKLKKN MHIGKYNRKV YTYKKKVSID TIHEYILNKQ LKDKYILRRD SLKNVFVNMP LFNFYNFYNF FQIDHVEKYN KSKILNLIYY YLY…
	PFI1470c / PF3D7_0930200	leucine-rich repeat protein	MSNEKGDIKE QNDEEKLNIE SVHNDKKENT LFNDIIPQYD YKRIRTNIIN EEILIEGINK SCNLKREDII KDFYYAKVLS LENRDIVLIQ NMNLFKNLEE LHLNNNFIED LENLEELINL KILSASNNKI KKIKNLNNLH NLRELNLHNN EIERIENLSN NKKLQILILS NNYIKHMEDI IYLKCLDKLK FLNIMNNPIC NIPELQNCVI KNLINIKYFN NIILSSLKKV HKKDIYIHPN DNLTFYRPSI NKENEIPKNE NSNPYFYIKN NCSDIENYKK NINEAYLYEL TTLPDTLFDE KKQPPIFKKI VNYEKIKEIY LTNIENIHLG IIDKILLLNE DRKKCSDLFE EDVENFISQY MLN…
	PFI1515w / PF3D7_0931200		MKAYYVVIIL KVVLLLFFSY DFIFLKNEDN IIKGKGSSFL KSSYELLFVQ KDVLLPHIKK NNQISIFLCR SUQSQYIINK IKNYFDILNK GRETEIYFEN NNYIVDNDQK YILFLMSIQP PLFFTLICYF ILFIFILIAL NIYLPKHCEF FIPSFLLNNT KFIETFEKMR KKKIIVSSIM FLAYNIIYSI LCNTNEIHVY QNKNLIYKDY FNEYFFIQTL RTNLKNIHK
	PFI1530c / PF3D7_0931500	conserved Plasmodium protein, unknown function	MNILYLINTD TYTLFYTFFI LIICVTWIQY VLKKLQNKYS TFLNNEKIIN HCKQILDKNN SLQENIYKLI KYNTGKDNYE DKLLSRKYAS FYYLKRAIFF LHNYKFLHIK RKLNCLFIRN NITDIRNLKY LTYKKVIQFK KDMNICLSEA YNSFDYKNKK ELLYIYFKLY SKIYFFFQSE SIYFFHFITR VLLVSWVYTP LNTTFHWNVK GHKNKEAQI
	PFI1745c / PF3D7_0936100	early transcribed membrane protein	MRILKVLTLL VFLLCINVFS PCYTKNGFLS RIKDRFTKFE KKMKDKENKK KLLISASIVG LSLLTNLIVG FAYYNYRKNQ RNQALEFPQE ESRRRAKETK EIIDEINIRS EKQMAKNFRM GNEIIPRLKE VMTSIENEGK KKNLDLTRDD IADMSYFIFK NLFHLSETWK KNPTLIPID
	PFI1760w / PF3D7_0936400	ring-exported protein 4	MGNFFIISYN KHCIGQIIHM LYFICLIFIL YNRNTCLRRI AKCGRNLSEL NLDLRTDYDE REININKNIP SYPVKFSKLE YKLRNEWDEL EIDEHDDYMD VTVECFEKLL ENDKNLENYQ ENYEIRALVA YMLHELRRGY INEQKMKFKN FLHKLKEKRI NEPIDTLNND EQDEWNKIKN GKIKSDEEWK SYQLQTWEYL IKMEYYKNKY SQNV
	PFI1765c / PF3D7_0936500	Plasmodium exported protein, unknown function	MLNGKHLSKV FFFKISLILK LIWFLYFPYP KCELFQNKKH IRFLTQGKVE KDFNIRHVKI ALKSNNMDLT TSQKNIDKKQ IEYKDKDNIN DKEQIYTSYN NSEFTPVYVT PTKKKNTKKN FITIKKIDIY FENLIYSFLE SISYIEEPPD YELYNNEINQ KMKEYLFIFE PVVLVFISVY YLAAEEYIIS IIISFICSVI LIYILIKIRK YDKAHNNFFT VSNMLKEFIQ LIKNIPKNIL NVVLHIPKKF IRIINYFKT
	PF10_0013 / PF3D7_1001000	Plasmodium exported protein (hyp12), unknown function	MLFSFKYIYF SSTFLLLLVL QSKTKYIQNF VNIQETLNEK CSSKYIRLIS EQTSDESTSK SIKNCKCVNK RNNKNEDNHE LQSKSRSLKG TELDVTSYNK SKHTQQNNLG DSLKRTKNNI TNISSKKNET YLFDENTNEY KLRNTLRLMN ERYADSIVDT MDLNDKTKDK FKKFLHLYMA KENPDKQRKL YEQIESDIEK YKKNHVICSI VDFENIYDSF YFLKYEDRYI T
	PF10_0027 / PF3D7_1002300	conserved Plasmodium protein, unknown function	MSSVLRTILI ASFFYYFSIY KISPWAIIKN VDFQITYDEL SRNLYIHSSG KGKCTSHNYY INDKCKIINT SKKTNENNKA QCLYNQKCLT IAKYIFQHTG IEAVTEDIFL QPFVINNKLN ILQKEKCNRE VYINDKIKCL CCINDVVKNI QGDENEKIKE NVTYQYNKCK CLLNYQDIYG DSNFFNKCEN FECNNGLCTI QANGQPFCSC FENYYFEKKS NTCKKHEQNV ENIHHINSNR DIIENTENDT RTIVSIKNNP PNYNNSHNYN NANNIIHNIE DLEEHNKSSN ITTNGNTIIS QRNYNSCPLN QIKNKKGICE TIINYEETVC LRIDCSISTN EFQCFCTNVN GEHIKTDTFD VSY…
	PF10_0030 / PF3D7_1002600	conserved Plasmodium protein, unknown function	MNMRKRSINY KCIYIVLFYF TIKLIIILGN NKNSNLKNIH TNNYQWKKKS VQKRSYKSKK YKLMHFIYYN NLYKKVDVND REYKINDDLK NIILLFGRIA EPYYPKAVEQ FNHFKEPYSK YIYTNNRSNY NNNNNNNYYN ININSSSNIN SSSNDPSAKW KFIFRDIKKM DKNMFHERIC QLKFKWPINK DENITEYDFY NYIIERCLYN INIMRSNIQK LKYLLTKIVG NNKNKENVFL SSLSKEVEKE YMTHHVDTKK NNNHNEHHIN DNNNNNNIVI IPKDKINNEP NDNKNDNNDN NDSNNNDNNN NQHDSNFITS TSQLNSNNKI KILEKLENFN LNSIFKQHNR SYSRLLVNEV FNK…
	PF10_0035 / PF3D7_1003200	conserved Plasmodium protein, unknown function	MFLYFLLFLF TLTYINNTLN IKKKTPLFKF PYFINTYITY NNSNKRRRIR TFPYFARKET NRHVIYRKRF ERDLKYALQS IFYKQGIKLN YKYHIDEDII EGISVYKVEL NSDCSVAKVF VEIMGDSIDA RQGYIWIKRN TKDIRYKLAQ LIKERKRVPF LNFVLCNLSE QTQLLCEMEN IKEYYSDLFK DELTNDTEE
	PF10_0060 / PF3D7_1005900	conserved Plasmodium protein, unknown function	MILWNKKLLS VVFLLIYDTT NCVKRSDPMK GKPKSNTSPL PHNVIKKKME PIQMYFFAKR TKKDIQSNNK KKRKTDNFPI NDNITNWKIK KKRKKKKLKY EHENDYQKLD NVKINKRNHY THFIRNIIYN ETFKNYVEKK KRISYYDIPK NTKYKKYVSS IYKKKQGKNT IYMIIAPKGS LHEKKTKEIL GDPVKNYPWE ISIPFHETIT REQSPYYNFL KGEWAYLDYK RDSRRACGKI EGGLENYDGK GLKLEKGVDR PRYKEIPYYL DHGVEWRNFN HDELIQFDID PDGNQDQTFL ETEEDLEYRQ WGNWNYSCAK ETTQLNTAWR DPVLSKDLSN LIYPWNHKAH ENHIIPYGYR GPS…
	PF10_0082 / PF3D7_1008500	conserved Plasmodium membrane protein, unknown function	MSIRLLCEVI AMLLLHLIFY KVSIYYLLRH LDILNHSNKF NKNIFFITCL ICMSIFSLFI FELSSLISNV IITYIWHIDI CILLFLLYVI IPIEFINTIF DSNNYKEILS PEFHTHSHIK LLKKYYAKIS SIYKESYGIN KKIKKHFFFF RGILFLTFIW VILGGLRNMI YKKNYNYVIA DDNTINFKKY LLYKSNEGKN ANKIYNKTIF FFFQKKHTCF NYYFNNNMNE LYFTNKKKTH PFKQFFKQIY SFFYFLCYII IHHIILLHNF IIRELLINIC ALGVTTNSIV AGISSVYFIY DYIITFIYFL HIPKIQIQIY NIEERILINF TNYMFKKEEL EKLQSNIDIH TKRLSYDNRR NIK…
	PF10_0088 / PF3D7_1009100	conserved Plasmodium membrane protein, unknown function	MSWYSLLTLL LVSSILYIQH VTCLYVEDTL KISLMNIKSG DYIKLCCDIF CSFYKYDIFK KTFFFLKKEN NITLYNCYGV IKIYYSKKYL FYFSTYINVE QNNIIEIIDS FDKVKISRYV FFTPLFEYIT TKKNNMVYYI PFGYYKFGKL KNKMLNDKKT HNNNNNNNTS LIINNQKIYY TYEQHTKQIN KFKEDIFKHN KYKQDRKNNK YTTVRKYKKC TIFRKNCFTY IIPLFFYYIK SMNLKKCIPQ HIKYNIHTSN NNNNNSNSNN HFSSSSYYYY YYCCCYFFYY TKKKHYILSL GHNKLLLQKI IFNKCKIFQH IIEQNEKNKL RLYMYDNIIF HNNMMKKKKQ YNNFVEAEIY KFL…
	PF10_0098 / PF3D7_1010100	conserved Plasmodium protein, unknown function	MYDHKTFKDL LQFYDNLEKE EVLVLFFHST LLDNNYIYEL KSEKKIVFSE NENIEINDSY VKYKIDKRNK DLLITRILIH PEWRNNNHNY NFTYKQIHTS DTYNLNILKI GNSLVLQLID IEDPSSIHSC TINIQEYINK NITDKYINVN NYNEYIYVDK LEKIFQTNIL NYMNSKNKNK EKIHINKNNT NDIYNNKCNT YQTQNITMKP HPQNCDKNYL LHNFNDTYFD DKNPPLLTNH ILPNLNQPHP VLKPDGLLVG PNNKFFNPGK LRYDPMGPFG NEPNSDNRPF EYQNNFPF
	PF10_0116 / PF3D7_1011900	haem oxygenase	MIRKIIILMF TFFSNIHNEK IYHHKQRRKF LKGPLGYLNR NVIQKKHYNL YAKKFINYKE IQIQRINDYR KRSGVDKNNI NYNLRDTYNY HETHLFVRNE VLPTLAKIEN ENLKEKEKNK EIFRNINDYN SNFTRQTFLQ FLMDLYNIFL KIDDLFLENK TYFSILIYNG PMQLTNHLYD DIIYVSSVVE NSDDVSPSEY CMEYISHLEN LCEENKLSFL AHAYVFYKNF HLSKEHLLKS ICKYLNIIKK LKSSTYVADV ENFEFCLNKM SRKWSRWEKD NFLASLHNAT NKMMILTKHF EKVKS
	PF10_0119 / PF3D7_1012200	conserved Plasmodium protein, unknown function	MKRFFVLFVI FLVHIWSENV DTFKCNYSKK KKNGHHIKRH ITNDEEKKKE YSFLMLGKEN EEENKENKEN NQNVNKDNND NNNNEKKNEE QNHNNEKKQE EVINNNNNNV ENKKEEENHN NDKKTDEQNH VNEKKQEGEN NKHKKDDTIP PEKKINKENL LEYGTHDKEG HFIPSYKTLT DEILSTNNAM EKASSFLKIA CSHVMKLIEF IPESKLSSQY IKVDNKNIYL KDIAVECQNI YFNLEKFSMT LIVFNSKINK FIYSQEK
	PF10_0138 / PF3D7_1014100	conserved Plasmodium protein, unknown function	MNRIFYFCLF TILFWLSLVS GENVNNKNCN EKNRKAILLA LLKNSLVDNK DYNNSEELKY ALEHIQNSEL YPKDSKKFDK FIDEFFSYYN IHVNFTDEEK RILHISGVFK EFYVDVDNLN KDEMKEYFKK NYEKGLSLIN LIVHSNLIIQ QFDHDIIDKK KVHEQNTNTN KTLEYISDNL NDLINFKNIH LNNNSTGDFI IKLYTNYVNY INPYQTNPLP NTPHYYEHKN FHTKEHYIYD EEIVNPNMDN INTHTEEDNV YVSATKGNQK EETEKKENHE NNNAINPKYM NYETYYKKIF NAIFEQIDKL NKTLFEIKNK NNSETNENIS ESNSGNPELN NENSYSVKLS SSSPNSTNKE SLI…
	PF10_0166 / PF3D7_1017100	conserved Plasmodium protein, unknown function	MKRVYTCLCF ICLFFLCILK GVYNVKTQKN EGIIIDKEGK ENDNGNSDRN TPNNNNRLNR MTLNKEMYEK HNKMNNEEDN NKNINYDLSN LKDGMKKKHF GSNSSEDKTN KKSSINSVLE KYQHTKHEEK NLQNLNKNMM THENDDSMKS IFISEESFES AKNVCQFIVM QNDYFKNFCN ITSLVYDIEK LKKNNHKIYE EILSNSYENN NGSKFKLLKE INHTKVFKEM DNTNPKFSIL FLYDKFCYGG IPLACSNLMK YDNVFDINEQ SETTNKPDDN VNMEEMENYI INQTGMENGF EENVSDLTQE
	PF10_0186 / PF3D7_1019300	zinc finger protein, putative	MCKYALINKC DRGENCTFAH DINELRIKPD MRKTKLCKSY ILGKCTDNNC IYAHSVNELR EVGKPAICQL HREGRCIKGN QCRFAHSIND INTKLVKFYG SKVDIDVDEE IVQGKIHSKN ISNINNSCIN ILNKSKSQMM NKIKGYENEE IEKNEFINIQ NMKNNNSNKK DIYNFQMHVN NININDNEYT SSVNIPNDIL IKHKNNNNDD IINRANLVLH KNITGGDIYH NNNCKLNICK IYNNNNNAGN EKNEENILNI SHVKKNTKLC SLNIKNEPIQ QVNDFLLYNN NILEYKKEQK NYFISPQNII NNEYDGCNFN DMLNNNCKSL NVHKSICLDK SNMNIDEEYF DMKEKTMENE ELI…
	PF10_0207 / PF3D7_1021300	conserved Plasmodium membrane protein, unknown function	MKKAIFFIYL IFFVFVKVTC LEIRRGKYNI NYDYAIKSLK DNNFKRRGGE KGRRNNIYYM NINFHNIDNN FNNEIRKRHF NENDSIKDKL NKLKKLKNIL NKYKLNINKK DFDKFKNRTQ EIVVHKYHYA KKYSIIIFNR LKDDMSVYRG KLKNYYNTTT TYLKDKYFNS SIHEYLSSIP FFNKSSNISK LISYNSVNFL FLLFTILYFK SDYIYTFFKK KYAFIGEFKN IKTDKLVKIH TLSTLLFFFY KFFVLRLLFI LNSYNFFSQK LYLINNLIHI LFFSYISIFP YFLVQANWGS FHLLGYKKSK ILGGLVLLQL FLIYARLIFQ NNLSFIKTWT DEKFFNKEEI IQNIKDDKKT DFY…
	PF10_0233 / PF3D7_1024000	conserved Plasmodium protein, unknown function	MRKNIILVAY ICFIYMRAKC EALKINNILN KSYFAIISNY NNNNNNNIKH INHINGQGKH INKSSHNKGG ILNNEVLKKP GKENKKLKEN VPKDIKEHVS EISKENKFLH FENNKKISIN PLFQSLCKKV SVSETCLYNI QKFYSEVNYM NLKNKNPKDN KYFCGVLYGK YERDEFVKVE HVFFSMNKTE QGYDEKYLLH SEDRKRADQL AKMLNLEVVG FLYAYPDIGV DLNMSNKKQK HFIKLNKKMK TLNDEENEIF IPMGGKEVLL SIMLMWQIRR QSKIVEEKNG KAYAHMNKNK NNDSHNDDHN DGHNDGHNHN SDDTNFIEEN SDQHNNGNIK KKKNETIKFK NVKKKNKTKQ GKK…
	PF10_0260 / PF3D7_1026300	conserved Plasmodium protein, unknown function	MELIIKKPYI EIFEKILKLF THICENVHFK LTRNKLELSG SNNLTNELVI HIDKKFFILN DVNGDKKNII NGTVKSKDFY NCIYNHKIVK HLRSTYSQHG SYNSHKKNDS PFLMKDDMNE EGRINNTNND EIKSIVCDGM YPDDNNKSYF RKDKKWNIHL SKITLKFNNI NHNINNNMDG DDHDDNNNNN KLEIIIKFKK YNTYFSAILK LKTFNTPMKN YIYKNESIIQ IDPTLFLLNL KDLSNEKNIF LKNTDNSFII SSLETCDFSL NKERIKREQF FYNNKNICIP SSKTKYFFKN KKFQDHNMSL PLNELKTIIK FCSDLNLLCL FSTKNFKENL IIYFGNIISY ILEKNKNKIK KKN…
	PF10_0290 / PF3D7_1029700	conserved Plasmodium protein, unknown function	MKVFSIFKNV LMLFYIIATF HKIPSEGALN NAETLDNLDD NSLLAFFLLI QLEVPYFLDG LSSKIIYEKV IDATMYLFKE EIIKSSHINE IKQSLVQDIN NTIIGLNNIL GDIRNDDEKY FKWLQLIFSN CWKIENGCIN ITRRNCSLSV LTMLPKKGLP ITCISCIIYA LNYASHSIYL FKNFSNIENC NNENNIKLIN LSNEISIIRE NIIYLNSLEK ISVLKNVQSE IIVLHIKNGS GLIKLLNTQG HGAFIRIVSN SIYEVIKRSI NGYIKYVNNN NNNIYKNNDY INNLYINMKK SITLTINGYL YKDNEKNEIF RIFDFGLFLT DIHLNKCISL LNGNNIFIQL EIGSSQTNVP FKN…
	PF10_0313 / PF3D7_1032000	mitochondrial preribosomal assembly protein rimM precursor, putative	MIVLSSYKKC LVFSYYILLL WVLKYYMLTC QAINFKKTWS SKERRNNIIY LFNNYKRKSF IYDYSNINGK ARTLFLFVHP RNYLINKKNE IETHHVPLVT SRGTYINYYS STKKSMFFLL FVFFLKRKYD RKEKKLYHKR LGIRKIRLNE KKKDNIYDHN HQSQHSLTNN NMPEYLEKEE SEENTAKHKK EEEINQGNRQ FLTETKYYKR SKYSKAGYIK EKDHNNNVIE KHEEEKKKKK GLDIFDDFIN DRYNIYYTEN KEDLVEKMNE KKKKENKMSL PDFFILNYYL DKNRKNNLDL MINEGDNHLI KGGSALTGSF SSTMKNMLQN NVLQGKAYCN NGNMDNNTKS NSSDGSSSDG SSS…
	PF10_0365 / PF3D7_1037200	conserved Plasmodium protein, unknown function	MFFNKYKKKF RNTKRKYCSS PEKNERPKKD TNIYSTNKTI LKNVILKEYF KAILKKIYEN FQKNIYFFEI FIYMDLIKLI DSLDISGHYM TKDFIQFTNY FNETCYNLLT EFFKNFKANE QRCEDFSDYL EIIINNRFFI IILIPLNTPI KTDCILNLTK SHKLENNFYN IFELINATLI YKDKKSFLYK SFYMRICECS NIYLPHQNVL VQINNLGHLN EKNYKEICKL CFTKEYEEIT NKREFKNFYI LKFSFNKTID EYNNIDEYTN FEVLFQDIPE KNESFEIGSK YNLIVVSIPN NLTKSFVKGA RVGNLWLLNY NKNNLRKIED NIISLSENVN TLLSTESFNY LLQSQNLNDM NKI…
	PF11_0025 / PF3D7_1101700	Pfmc-2TM Maurer's cleft two transmembrane protein	MFHYIYKIYI FTIILCASNL FNNNVVEIGT YKLSYHNGGI QFRMLAQKND NKKSFGNTLT NILFKDKKKK NLDPQISSLV SLVDNMDITQ EKKDKIKNLS LKYINSRDVK EKNESINELQ KYSNNEECKE QMDSYLMHLR MQNDIKCLKR KNLWNNIGIN SITLSLIIIM IMIACMFAIC NAPQYIYVPA SFLLIFIIYI VARYFPDMKI GFKKLKTKLN TFFQNKKQIT K
	PF11_0044 / PF3D7_1103400	iron-sulfur assembly protein, sufD, putative	MPNIFLSNYI FIFILLTNKF LKTFDYVESK HWNNICLKDL YDKNDIKLNK TNKLKLKYKN FMFSDLKKQK KRKETETATG TITQKQKHTK KKKLHGQTNG YFIKRNKIQH IFANIPYNNN FKKINQDIYT FKNVNYHPKN ANKKVYLKIN NATHLETIKT YITKCIKNYR HQNEEKTQKK IRNYNNIIQY YVSRKNNNNN NNNRFIHTYN MLFINIFYNI ISKNRNEKKK KNRKTDFQKY LRKYEELYQK FTPENDAENN DINNDKNNSD LISQINKKNI SNIIINEWCL RNNNEKYNST LMYDYISNMH NTEYQDITCV NNFIKNNEMI EKETWEHKQK PYLTYKYEFK YRDPINRKNK LYQ…
	PF11_0045 / PF3D7_1103500	CPW-WPC family protein	MKKCISLIFV LFINKIVGVK IHLYRKYPNV ENGVYQIDSR GRPIKIVDVN YNHRWEIPEN GNINSYSVVR KNGKVKKFSE GTNLIYGTTK RKLINDIKEV DEQSEEEIKN LILKNKKLNI IKNVSDVSKK EKNIKELEKK KKEKPPIAMY IAADDIPDDK KKKQEEDDIN VANELGVAIK ENLESHYEIT KEPSALSTDL LNMKIPTTLE KLLMDDIDEI KWISKKPVND KICMRDYSKQ CPSMWEPITE TQCSAPKDYS GPCAHIMILE PMNAKEKSSI AKDCKVNWSC INESCGNGER DYLRECPENW IYNGTCEAPE NYSGGCNRSM DFDTFTQNDK EQFSSTCKVV WPCKEESCER DYS…
	PF11_0045 / PF3D7_1103500	CPW-WPC family protein	MKKCISLIFV LFINKIVGVK IHLYRKYPNV ENGVYQIDSR GRPIKIVDVN YNHRWEIPEN GNINSYSVVR KNGKVKKFSE GTNLIYGTTK RKLINDIKEV DEQSEEEIKN LILKNKKLNI IKNVSDVSKK EKNIKELEKK KKEKPPIAMY IAADDIPDDK KKKQEEDDIN VANELGVAIK ENLESHYEIT KEPSALSTDL LNMKIPTTLE KLLMDDIDEI KWISKKPVND KICMRDYSKQ CPSMWEPITE TQCSAPKDYS GPCAHIMILE PMNAKEKSSI AKDCKVNWSC INESCGNGER DYLRECPENW IYNGTCEAPE NYSGGCNRSM DFDTFTQNDK EQFSSTCKVV WPCKEESCER DYS…
	PF11_0052 / PF3D7_1104100	syntaxin, Qa-SNARE family	MSYSNKKKEY KKFSNKNVMS FEFNSDIQND IGVIKSYTSR ISRINDDEPY SIESSEKVQE IVQEGKLKIQ EIQKKLKNYR NITENVPQHE KVRVKLMLQR LSNSYLEAVN NFQNASKNYI NKTIMNDLST KNYNVEENME YDSLNNFSRK SNSNYDTNID KYNVNIYDYN FYENNYETSY SKYNNSTEFQ SVDSTIEEKT YKKKKKYKSN IFTGDKKNEV NEYLLENNNY EQENNNYGQE KQFVSINTVD IENEILTQKN KEIKKLHKDI INIQELYKEL FEQINIQGEN IDNIDSQMVN THDNIMMSGR EIEIARNRYF SSLRCTIYLL FLILILVIII LVVFRII
	PF11_0059 / PF3D7_1104800	metabolite/drug transporter, putative	MKKWKEKRRW HINIILMFLH HFFDRINYSM RNTFLHDHYI FMKFKKNKII GLLSIINSSV CLVISPIVGY YCDKHKKERK KMLQFISVSY LLVNIIHYMF IRTNSLSLII FVTAISKMLH ECSHVITESI FIESIDRGKK SLIFTYQKLI STVATMLGPF FCLILFYVYN DKWNIKNIFI IFQFSILTIV PQTIISFLWE NKTVDTIKNS EEIELLTKKN DKKYMFCFST KHIPYIVFVS HMITLAGAGM TFKYFSLFLK SEYKVSPILM CILNIVIPVL LTVFTYISQK LSKCIGRAQV SLFFTTIGFL LLCSLLYIQN YKDVLKVHVF RSVFQNCTNS IDKSILYDFI DTNRYTGRWM GVQ…
	PF11_0067 / PF3D7_1105600	translocon component PTEX88	MIYQYIFVLC ILLVHVGQCM YKIKQSGDIL LSSQHNSLMN VKVVGKDNSF NLELNNMIKF PTNCIPFSTI DYNNKKGKKP IYYIKHEFKN LIFLYKNNVN IMQMVFPDRL YMVGIAANNG LLLTLTDVDI YRIDTKKKKV LLSRIKPGKY AHILNNRELF YTGVIGDSVL NKFFVTAAIR NNYYILHMEY NEENESIEIL NVIDKVNGQY LRVLNDISIV GDVLYITENA ENIVQIIINR EKNTIQEKNI YTFNNNDKIV GISASRHTLY NNNNDMVDKY VNHNMKDNQN KPADNMNDLS NNTMIITVDY ILVNSKKMFK EKPSSEGCLY LLKITKDSVE KYTIVDLFSK DINSFYFTIY DAH…
	PF11_0073 / PF3D7_1106200	conserved Plasmodium protein, unknown function	MFCSFLFLFF TFFVVQNKEI AILCSKVHLK KHIYYPRKGS HFHIYSVVDN NVNLKNKNEY NSKLKDRIKI YEQVHNNKCK KIYFLPLIFL KNNNKDVYIE DHKDKNIDNN NNNKKDNKKD DINNNDKKNK INDTPAQNIT NDKDKNYSNN FEYIENNLLK LKNNLEVFSS YINKSDVIIV PLNYHDILNK HLIEIIPFNN IINSLDYIFL FNKNDYNKSD ININNNNNNN NNMNKYNICP PYNNIYNIIF FIYNYNDQDN PLNISSYTPS FFTNKKDNII HKEKFQLVHV IQKFLNDHYN LKDQNEHKKY LNINFLFTKD NILDINKIDK DIEENKMLYY PKKNILNKET NYVNTTNNTN NTN…
	PF11_0074 / PF3D7_1106300	exonuclease, putative	MIAFISLWVL CIINVMAYCI SLNKYKFIKS YNLYNKRKHQ QNVLYGIPRM YKWLTSYYPT VREELINNEK QKSVDIFYID MNGVIHHCTH ANKEKLPIYD EHELFSNILQ YLKNLFYLIK PKKLIYIGVD GVSPKAKMNQ QRKRRFLSIF KINDNDNTSN LFNPNCITTG TDFMYKINLS LNKWFKILKK KKVFEFDVIF SGSDVAGEGE HKILKYIREN CKRDSNFKNY NHCIYGLDAD LIMLSLVTHL NNIFILRDKF KISNDLHNNM LENIERTQNT FNNDEYNSFN EPQNDNINYN EEGENIQLNE KSKTNESLVK EENNVEYENN EEINNEINNE INNEINNEIN NEINNEINNE IND…
	PF11_0076 / PF3D7_1106500	conserved Plasmodium protein, unknown function	MFLSIQFIIL FFALIHIKNI IALKLEIFKG RFGSPNSTSS MFNKDNKIKC RRKEVPLLFV SSNKCLKDLY LLKHSGVSPF EEKGSFIYLK RGERNRKDKN YPFTLFIEYG TSKSANILEK DSNKYEEGNQ KYTNVIMEGC KDIIDCTKSE GLQNLMNQKV VENNKMDENI KMDENKKMDE NIKMDENIKM DENIKMDKNI KMDKNIKMDE NIKMDENIKM DKNIKMDKNI KMDKNIKMDK NIKMNKNIKM DKNIKMDKNI KMDKNIKMDD NIMMRENKKV EGKSRKGNNI RNKSLVLKRI GNRKVYNKKR KSITSRVVDI QNTNVRDYLF LPSQGRSLKL LNIIYNSWKE KNFDNFFDVL NSD…
	PF11_0135 / PF3D7_1112900	conserved Plasmodium protein, unknown function	MENLNEHDEQ NIEMSTSIIK NLDIPLLIKK QLNLRDLRRK NKDLSTKNAD IRKFLNEKEN YFSFKEKVYN ENREKLNKEY EQAMNDNYDR QIILEEKIKS KEKKIKEYDL EIKRFKEQIG DMHNRIKKAT HESEEKEKCL SFLSKFKETS IEFVQLDMFD RLETIFNSRE FIRKKQEKLK SKINIIKDKI KNMEEKNNLT LTNKEGEYKS LVHTSESVMK KEKDLEEQLK ENINEHNKKA LLLNKIISCI DNFLSRFSTF LPELRHYNMK KDEDKTSLDK KNKPQDIMED TQFIDTANFN ILEEDILKKL DYIYKYIKDT IYIINKAKKE ISLKDDNYME AMKNNLDENI EFLTYNGNIK GKN
	PF11_0178 / PF3D7_1117200	conserved Plasmodium protein, unknown function	MTLIIFVVSM RMNVKNFKLK KDIFEDSYLK LLIENEKIEQ DAPSCYFLSY LYNNIYLYYC DILFHNKNKQ VHSISHIERD INFFNYENVE TKKKKKINKS EEIIQNNIRR NNKNLIYIKG DEEKYINKKY INDVNDQNNL YNLNELYKVD KLYNIDKLHF ITSHYLAYNK MQNSILQFYI PNFNMNKISK FDKHIKGLNK TYHHSIHYNL GANTISEQSH VLQVDHAPSC KKKKYIFKYH NKIYSKKMKR NNSNKKMKYK KKQIKSSSLN ISKLLFPFFG YTTSEESVMS FSKFLPEHKI ARKKKKKKKK KRQKEQKEQK KQKEQKEQKK QKEQKKQKEQ QTNNIINNDD HHDKPYTYQS KDK…
	PF11_0197 / PF3D7_1119000	acyl-CoA-binding protein, putative	MLKNINKPVI FFNVLTGLAF IYLLKNYNEN TKHILNKLYS LKNWIVQYSC SFLKRYDSIQ LPIIDKDIII DLSNEELEEK FVQTCNAVKM YRNKLKTEEW LHLYGLFKQA TIGNMILSNE EDSTKNTETS SNNNDTPSNN NDTSSYNNIE NISNIDGKKK KKNKNNKNKN KNNKNNNKNN NNNMEFIEIQ KRKAWKNCYN VNKNTCKYLY VQYFNKLFPD ALEKLNNDDN MKFSKTVSKM KPFKEQNKKH LENDNNDDNN ICDILCQHVV MGDLASIKKN LKHNPSLINK KNSSGLTPLH YACDRGYIDI VKYLVNQGAN INVEDSYGDT PLHMAAYSEK LNVVDFLKSV GADINKTNSE GLT…
	PF11_0218 / PF3D7_1121100	conserved Plasmodium protein, unknown function	MKGSFWNFIK SKKNDDNESK PTVAHLGEEN KFYFNKELNR WVIKGEEDKI ENEEKISAPP KMNTLQNANQ GYRSLVQQNK MRSAFNIYAE TPGLKTIKKK NVLVQGGIVS PYMESLKNEK GSSSSNNNPS DNKTEAFGSN IFIPSNNKVY ENKVRDNKYV VENDENYINN EQKKQKTSTL ENKNYNEEVK EENVLNTSYE NISQLNKSTG MDVFLKKQSY TKNDDSMFTK VYSNENIIDT PNKNNNLDKT FNDNISNENN NFGYSKNEES KIMTPIQSNM HIPVISRRET KPTSFDNLHK FYEIKRNETK EIKSLKVVWN PNKDADNQND VYNNNNNNNN NNNNNNNIIN NNNHVETVFE KKD…
	PF11_0230 / PF3D7_1122200	conserved Plasmodium protein, unknown function	MTPNNMYTGF CFHDEKTCEI DRIHENITAE KFYVDYILKR KPCILKSEYV IKNKLNIDLN FMKEKIENVN VHLEKRISNS FGTGEKKKMK FHKFLSLLEK GNKKYYLNTQ YVKENAYHPK DFCNSITRQM INYLPKELEI MGNLEIYQYN IWLGNNKSTK LKTYLHHDYH DNIYVLLKGK KTFRIYSPNF AYRLKTNGKI FKVHKNGLIT YWPFIRSDGS HILDVYKKQM NNIYNEINIM NEVLNKKDPL VDNQTIKDSI NKAEEKLNLL EENILNYKLK KHDFHRQPNA RQDIPNHFCL IHTRKRKEDD NIFDKNTNIR KKYIEVNLNE GDILYLPCGW FHEVKSFSSE EQYHLAFNYW YYP…
	PF11_0231 / PF3D7_1122300	conserved Plasmodium protein, unknown function	MTPVTFECIS VALVSLFFIK ILAYIYKQKC EKDNSKVKKG KENNNNSTMN VKLDIVCDIT NSFGKYYTKE VLKKKNILGI IPVYKSYNKE YENVDKFNGF MAEFFKFLDL RNGKVILASD NNSINNYINP LSKIEDTENE NDEEDILLAS CIIYEKILII VCVINYDMDI EKQLDYFLKN QKNDLLIVIN NLFLNSNLKD EKNYKNMELL EKKCSLVPKG DVNNLLSFFD FMNIKKGCIS DLYSIIQINM KNFRYFYKLL GNTTSGTFFN GHVYDNFMST NIYNSLMDIY DDLISETIKK DKKKINIKKF YTFYCVKCDY KKIVKLSLMK LENNFFLFYI YNIYSYIYYQ LILYVSQKNS V
	PF11_0234 / PF3D7_1122600	conserved Plasmodium protein, unknown function	MESCRMYGLE FNSFIEFDNY EGGVKLTKRL HIKNTTKNII RFRFLFQSST YFTYPVQEIE NISPGLNKSY LISFLNPLND LQTICEILNI LIDDKTKDKK ISIQLKATPL KCDIIIPSVL NLNEMVIKQK TKEDFVIKNQ GTLNAIIKLS HKIVSKEKKL KIKFDPSQFI LKANEKKSIK IIIYSEIPQK YNEFISTSII EIPKHIEKNI FQQEEIKNND VKDTNKKKEK FEKYKNDDNK KKHFMNTTIN TNETEEAKNV NDIIHLLNEE NINVCLIKKK TEINFLSVLP QINILFENNK EVFNKSILNF GKITIGQKVK KTIYLQNLTN SPIKIIARKQ KEKNIFILLN EKILLKEKNK EEI…
	PF11_0238 / PF3D7_1122700	conserved Plasmodium protein, unknown function	MKLNKFFDRV FLFSFIFFNI KCIQSISLKT PGLYFKNDIF YTNRNNNTYG FIGFSKKDYS FPNLNKTKVY SNKDILKKFN RMNVLYSQDS EYGLREYKND KSLWKRFVNK MSEVNKNVLT KLVCAGTFCL ALYPVYTMLL NSKIEYLIKN ILKENFLYLN IPKSIKRYLF FISFAEFKRS PFFLSTMLIA SYTLYVILKV YIEKYRESKR IKSAIEDYNK NKNEYINTGT DSSTENDMDY YNNMDDDDYN KDFY
	PF11_0261 / PF3D7_1125000	conserved Plasmodium protein, unknown function	MKTRCVFFWC VFFWFVSFFY FPVFYFFHIL IKCVHIKKIR TRCLPLFVCN HKQKYVTRNK SLIKNKSTYF KTFLWGYPIY DDSPHKLRRQ KIYPNFEYGE LRKDQDYDYV IATNLSQNNH KVPDVGYFFN VEEMGTGKTD DIHTPIEVVF GERDIDPKEV EKIKDVLNTF DQGNGLGICT LMGAKRGHFA FKYNGYLGHF HGIKNYLRFL INKHYPGSKV TLISEHWIDN IDQPVCLRHS NIPLSKIGHQ RRLIFGKYDY IYENDKNKKI YKGENRSNVW AFYNDPQMLT
	PF11_0304 / PF3D7_1129300	conserved Plasmodium protein, unknown function	MRSHSTKDPF RENFQKLMKK KKKPEQVRKY EQFRKKKKKK KNIHNITKDF IEPHKMLEKF KSIKKKKCFF ILSLNIDKKN EEKLRNSKNK IKFIYENFLE KDDQIIVKPS NKFLDTCNHG QIKPCSLKKC YNKDDIKVNF LNDMETELKL NVLHKNVKYN ENIENKKRIE GTEIEMLKNM SYKENNISTS IRKKENGYGS TNETSENFLI KNHYMRQNKN VYIKWIREKK EDDSFEKINY MKSNNFALNN NKIKINFDKT KVKFVHLKCP TKKLVKTHNH KNIKEHIYLK DIFDLKNQKT KNILTNFIRR ENKNEDIKEN EPNNFNKTNL NNTIKRKIIF SNIYKNYLIN KYKSSNEFLK TNR…
	PF11_0307 / PF3D7_1129600	phosphatidylinositol-4-phosphate-5-kinase, putative	MGNKLTCGEI RNDGVRGLKN AYNLELNKSN ICVENSTTCE NSYDEENYFY RYEDVSYVEE GEERKREYSE DEIKEEVKIV VDNNNNNIYN YHNEIKDKNK LMKKRENQYI DKKYMINVKR ILMYIKEYEE DFLCFFKKNN ATSIIYLKYI VLNYKTYIMI IEKGVIYIGE LNEKNEKNGL GIIITPDQCI YIGEFEEDKI TGFGLYIHYS KSKYIGYWRR GKANRYGIFI HPDGTFYKGF WLNDKQNKNG IEYVYNNYVY IGNYCKGEKN EFGIFVWNNE CMYMGNIKNN YFFNRGIYFF NKYKIYIGKW KSNCVDGKCE IIWKDNRQFF GYHLNNLKQG LGIYKWDDGR IYFGNWLNNK QHG…
	PF11_0323 / PF3D7_1131300	conserved Plasmodium protein, unknown function	MRGLKKIGCF LFENSTLPTI NTFIILDIIL RILKIRGNKK KREKTKKNYK KKKLKRALLL TNKTLIDLFP PDFDFILNFL NNSLDRKDKD NDKDNDNNND NHIDNNNDNN NENIWTVNKI KNYKNLYRNF KDDKKYNIKN NNQNEEKNSL YINNNHICDD IYNQHIYNLK NEKQTNDTFD NLHITIEMLK DILNFIHIKY IDKENYLINL LYKLNQNKKY NIIVINISFF FIKDDKKIKI FLDYILSSAY KNVTKELTMK NKDKNNYDHK NEFLSNSNNI IYSNIEAEMC DRPFYKNILN IYFHYSYFIN FFEYLNSVSH LSLTSHNIKT IKKKKKKKKK TNNNNDNDNN NYDNNYNNNN NYD…
	PF11_0324 / PF3D7_1131400	conserved Plasmodium protein, unknown function	MIFSAVSSKC LAKNVRGNIY YVSFLRINTY NYSSIFDLIL RKKKERICDD NKIINDNRGK EEEYNECNIK ERILKCEVPI YNSNNKIKKK ENISYIKNYV HKDKKCSDGF ELISDDNIYN NKLYILRYIK YLQINDDINK YRFISKHIIN NVYKFRYNEI LFILKIFCKR KYKNLLLLQC FSEYFYWLCK LKKSNKTNIS YYLYFCSRFN YIPTIKYVDE YLDTFLCYEK WVPGMNFFSL NMIEEETNDC AKDIKYIINV LYFLNMCNLK KKKELFDTLL YMCIYNINDL TVKNTFLLLK ILITNIENDK YDISVFSTIH KNIERHINSL EDLDFHNYMN IIFYNNINPD ATFFRFIHNY IDK…
	PF11_0328 / PF3D7_1131900	conserved Plasmodium protein, unknown function	MMNMITFMYY MVYITTTIFI FKDKYNIMNR NMKERNFFTR SFYNNKLSQT FYEDDYDFFR LVFVKFLIKV QYLNKHVHLG DVKESFETIM LSMSMNHQNE MYMKLYEEIK KIGEDKRYKE LYEHNNINIE IEKRVGKNRN RITLLSLLPF DYELKTLNCK ESYKKIQLLL DILYVSIIIS YHSLFNNHER KNMLILMYEN TINQWMSLNY LRKIMKYELS LNNDGILMYI SLNKKKERTK PKEINIKLNN NKNNELRELN KDVQIMNDIK IINDDIIKNI ENKFKYIINE HIQHLYPNVI GKEKLSFLLN KLMNVYIPPV RVIGYATFNK HNLYTIDENI KINNQFTEEY FNMNKDKVVI QMM…
	PF11_0333 / PF3D7_1132400	conserved Plasmodium membrane protein, unknown function	MDIENNSKNE DPTYRSKEKI FGTKVCQQKK KKKVNALKYH LSEQAQQVKR KSIDETNEDE ECSHHAIGIN HTKTMVINDK EKKNIYICNN KKICNIKSND IKLMITKYND IDDSILHKSN NIGTSKLEKD TKKGKTEKFG KYEKYGNNEK CEKNEKYEKN EKYGKNEKIY QNQPDFQNEK IIQIHNTNKM CKKDYIEIKT NQDEDILKNN KEKIADNKKY IKNISLSHIN VIKDEKMKTC KHSNNHVINI FEKYDNNISC FSTFSDLKEE NEKCFKNDKE KMNRQNNQRS MNKNIYFLND KCIKKKKINN NNNNNNNNKN NVNKENNKYD EKNKYCEKKK NCEKKKNCEK KKNCEKNINS EKN…
	PF11_0348 / PF3D7_1133800	RNA (uracil-5-)methyltransferase, putative	MSTYLFVYYL ALLLIYIFFL CNKKGFHFCH RIILRKRTFS FKLISCNKKI KKIIRKRKGI IKKMDISDKE ALMDMSTRSA VRNKNVHLSL NNYTNVLNRE HNNTKLIRSN VLSIFSYTLK YMNKKSLNKW LRNNIKATFY DTYIPKNKPL AYIRFKSYDD LKTFEKLIEN KRFYNDDSLS LIKINRLFNK QHNNVLRKKR KFNDENKLYY NKNEVKNEKT HENNTNDEDV KFLSVNNDKY GEFKSYNNSD INNYYDCNEG DRKKLKKDDL YNNNNYDNNN NNNNNNNNNN NFNNYNIMRK QNMDDKEFLD LQSIIKINKE EKFKSIENFV TPFYKYPYQE QIIIKHNFLK KCKDQILFNL KSK…
	PF11_0372 / PF3D7_1136100	conserved Plasmodium protein, unknown function	MLNFSFLFFF SYAIFYKPYL CKNSKGKYHD HLIRDFTHSK DDLINTCLEV NNGLTYYEEL LKNYKYDTNC LKYKYIGNYV LEKYQMNEFN CYEKIQKALC KLNYINKENV VVDVKNNSEE KKEKKGYHLW ENNLNSKFSK CHNIKKFFVH LINRCINNHE EDSLVHCASF DYQKRIILDG DIFCKSSFEQ IKVEQNFNKN SIYGESYKNY ITKTISFQND DFNDCLNMVN IFNNCSVVQN KLFNKTLDIC LLEKNTQFCN IQLEKVNDQN YIYTCSDIIL PYLLSFNMHE NNKTTYEFDD DNKYITKQKD EENQSFTNKE RCHDIYNYLK ILKDNKKKVL QEKKVLEQHV KNINIINKLY KIL…
	PF11_0435 / PF3D7_1142300	conserved Plasmodium membrane protein, unknown function	MSTWINKKLI SFSEKVIENV IDSFTNKNTP IDNIQNMQGT QLGKIINKVI SSKYFFKNDD ICYNKNNLDF KWYLKKDRKK SRKIKKKQKK RKRKMIMMKR GVENVKNADS SNNDVCHDQN NNNFNDPLVS KNTNYNYLYT NNNENNMKES TFLKIDESYL STSYILNGKF VSGNNISDNK NDLNEKKYIN IKRTNSHNDT SSLSISQNNF SKIKKKKGAS SINSYDESSP NVSPPSMYSS ENLSYNEKRH NNNSDNNNDR NMKSYNYSSS NINKNCSSSS TSSSISSSSI SSSSIISSSI ISSSCSSVTC SDSSLNIYNT KRSSHGSHNQ FCGSMSCYEK DKKKNRLDNK NKMKNKNILN KKK…
	PF11_0464 / PF3D7_1145200	serine/threonine protein kinase, putative	MDYSNNKKNV KAMNQHQNKD SSEYNENYYK RQYNIKNRKN EEIKVGSNLS TNNDVLQLPS VLHNHIRIVR TNDSCFKDYI VLSNLGKGTY AQVWKVKHKI TNEIYAAKLL QPNQFPKESF NRIVEMFTKE IINLSICQCP GVIKLHKVIG GKEGWILIQD FANDGTLWKE NLSSNMNEAF LYFIQLLQGM WYIQEMNIVH RDLKPTNILR YDNKRIVIAD FGWSEHIDSC NLHPTEWPGT LEINPPEVLR NTGPMTEKID NYALGMNMIL FISGRFVCRQ KGIECSKVAQ TILKTVHNLR HSKPPSRFRE NLKAWDLFVK LTSSNPIERL SLQNVLDHPW VTEMLNNFSL QNSKFLWHEK VKS…
	PF11_0470 / PF3D7_1145900	conserved Plasmodium protein, unknown function	MNPLLEYKRI KQALSNSSNI NSFQHKKDVI INKDRNNIVR HKKINEYKYN KSLKHEKNKS KRDNIEYVKY NNNDFVINKG DTRKNDEEEE YTLLIPEDDT INKNKINLTK YEYCYICDMA KPCECPDNYC PYEDNNNWKS RTIKSNIHSN LTEISNIIEN IQTNKRKNEN STITNMKKNP IKNNQTIMKY KDKKKEINKT LSAYEKFYLE KMKVVKHKLN EVKNKSDENW DVNKELNKYL NEVANVKYGE ICHMFEKRLD ALRDIEKKHL NLLVNLFDEH KEMEDVIFHM INEK
	PF11_0503 / PF3D7_1148700	Plasmodium exported protein (PHISTc), unknown function	MKQHITFKKF IIYTITLVYF ILLLKTGKIQ FNTIPYAELL HRNSRTLASA MQHSLRGDFV TQRSTCFRTE KERKQKALNL IKNENNAEGY FNNLNFNLEY TEELNEQITS LDPKTSIQEL TNIFNDLNEN RKKNFHYLIE ALENVSLILA HQNDIPEKHR KSTWCKIKHD LQCDFIKEHP NIHSNFDVFI RKIQSIDEFI SYIKECIHSW NNFTNEKKLQ YFPKVYETYQ SDKICKENNY KKINNKTECN PKESIKNESI PKECIPNENM KKECVPNGCM KKQCVPKECM KKECVTNGHM KKQCVPNECM KKQCVPKECM KKECVPNGCM KKECTPNKND KNVNRTDINN QNKTNEKLCD KKE…
	PFL0115w / PF3D7_1202300	dynein heavy chain, putative	MNNEIEIYIK NKIIGMLNIH DHVLEECLKD TKNKNNFIYF LSSSPINTTL FFVLHKYTHE ECEIDKELNI NPNDDTKNIL TKDEQTQNKK DKHNQDDVED VDSDNKKEEE QNIKNDLLED NDVTYTNHIN KSNNVAKENI KQEDESNTLD IHTNNNDKEE LKNKKKEMKY ILKMSINNAC IDEYIEEENE IYDNNNNHVG KKKKKKNIYK QVIYFLKIND KKINNINIEE YFNKTYTFGN LHPNYINNFK TFFKIFFIPF FQCLLKKNNS LEYFTNDIEQ NEKIENILMK LKNIKKKEDL NNNYYEEYQN KYLNFIEKSK YSGRQYDELI NEAPENGLFL SHQGNSIQKV DINQNEKEKI YKY…
	PFL0245w / PF3D7_1204900	probable protein, unknown function	MFQALSYTEK MKIKFWCLLF AYVISFVSTT YTKINRKKMI KNIRGTEIQT NNLSMATIEN HIDNKQQRKD CYYSFQNYCL TPNQFNSLLF LLNGVAVITV FFIAIVIQRT TFFPVKSNQE EIIDVSQITN
	PFL0365c / PF3D7_1207300	conserved Plasmodium protein, unknown function	MWEKILFFIV LIFPFFHSCE ALKKGNGDFI KKNGVFFQID RDMNEPPYSV INVFYTESLL DDNLLNQLEK ERKMGKYKTQ NYFRKSLDNN KYFMEYSRKQ KEQLEFLLE
	PFL0375w / PF3D7_1207500	conserved Plasmodium protein, unknown function	MKIQIIFILL LNMIHSFVIK KLKWEGEQYH KTKFQLYRTR YFRKYRTIPY IKDSGETHIN ELTRERVRLN KHTANSITLG ANYLFICNLD NRLSSKDVTH FFNYFVGIDN CIAKIKKNRF TGRNMGHGIL KFKKPCDATL VLLNYQGIKL GDKNIILTEA FKNDHLKQKK HICNVIPPSS RY
	PFL0600w / PF3D7_1212100	peripheral plastid protein 1, putative	MIYYIRKVAI NFLFLYIINF CLLHYLKECN TSNYSRILKE QNGKKYIYYN LSKKKNNGII KGGSKHNGHL FINNYKKKRN VKYKINKYKP CSIFSFFKKK DKNDKNDKND KTHMKDNSNL ENKEKGEIGK DKEQKEKEKE KIIILKDNKK LDEKKKKELQ KEEKKTKLTN VLKQNNKNKN NNNKNNNNKN NNNNNNNNNN NNNMDDTLKK DKQTELIKKD NLNNKNDVKK KKIDLNINNI DTNSRDILKN ENKYKKHLEN VKDKFIISLN QIFCSYMNSL DKKENFKYFF EKILQNVEKN FHTYTFIIDI EKMNNQQIKK TYMINNINCF NEIMNIIQEN LYNILVFKIQ YLKVKAINDI KEI…
	PFL0615w / PF3D7_1212400	tetratricopeptide repeat family protein, putative	MNAEMKGTHL KSVECPEKSN KKYSNLKQKD NSDNEEKGTI TLNKEEINYC KTFLTKNSIL KDEKVINNIH NNDKNYNKVI SDNKDIYDIH CETNDSIVVD KKRDMHDKNN KENCDINKKN LNNNITDIKL SDDDKETKDD ANEKYNKGDY EGALKIWERG LRSINYVLSK RDELNPERLE AFLKMHTTYC SNIAQGYMKI NKYSECVKYS LLAQENDKNN IKIYFRLAKG YFMLGEYDKS IKVLNEGIKI NKDTSLINLL KLVLKKKQTH LEKEKHMMKH IFQNLKQKPL INDDNNTKSF FFYISSSLKF LFIFIYALFM KIYNLVLGTI MDKFCKIHKR
	PFL0655w / PF3D7_1213500	conserved Plasmodium membrane protein, unknown function	MCKSHNYMFT FFLWIVLFFI NEENIQGKVY QGQFYLKKNE KIHYLTKFSC NIGTCQFSIK MKLRDNITAK LLNNYYKLNN KTLKEMENDK DDGNNHNNNK YDDDNNNNNN RSNKLLHMDY DNAYYVLSNQ DLEYIPQRIT LMQDIEQRYV NKNDKCYAFG NLKNSHMFNI PFYFKYSDLV NSKTYNLKNF INNKYSMSFN AIHSELKNNK LLQSEILNYG PILNEKNSNY AYKEIYAKTT HRVHVWFLMF DDCYDNFIRN LKLNIKTKLA YWEYLLHASK KFDISSLNDM DIKQDTSYND FQNEETEKDI YSKENINNNN NNNMNNNMNE KKNKSIFYKS FNFDKITLLE NPKRFLFLEE QFT…
	PFL0700w / PF3D7_1214500	conserved Plasmodium protein, unknown function	MFRISPMLLF FLFYFSSYNI YFVLTRNKNG QPSCSNVSCS NEKLNYIYDN SKFILSELQN ILYDVRDQRN SHELENEYDK ELDIQIKFPH KKDHHDLQIW DDEYEEEKQY SEPVPYITIT NIEEDSDDLN KSIINDNIYN EDNSTNRPLN EEEQIDIALS KIYELEEQMK MFKEHNGKQN FKKYLR
	PFL0715w / PF3D7_1214800	conserved Plasmodium protein, unknown function	MKIIFIVYIF ISTFSWKSIL SYRRLKDINN MDGIPQGFSK NKQINFHELR SNANKDKEKA YTYEISEWII MINPRNAKTH TGKIRSIEIY SMTYPYEQLE VFKEKLKRP
	PFL0840c / PF3D7_1217400	conserved Plasmodium protein, unknown function	MIYLEPLESN DKKEDNWENN KINEDENNDN CENIFLSAKE KRDNEINRIL KNMKKEERNL CFPLLDLYFL NKNFKWQNLK ESLELPNNVN EYINLNLLKK EIFPKDIIFQ NDQKKKHEKT WIYNKLIKSG LLYDKKIKDN IINKLNNNYN IIEKSDNIKN ENNHNIIVNH NFPCEWINSD DIIGTFNPIY NARDKIINDN YISSVPTIDI FYNSSKLLTI QTIFEPINHY IYLLRLLPKF SLPLYDSGIL QYVCEDPILN GKLKGLELSY RLLVHDILFY AFFSYLSDLP FWAKPPIEIL RIYNYESLYS FNDCESEHTE RLVFHNIKSI IYNFSDTLNK IELLYPKNYY ITIFPNIYFK NII…
	PFL0875w / PF3D7_1218100	conserved Plasmodium protein, unknown function	MNINYYNKYK KFRLILFCFI FFPYCLIVQL IGCIKLKTSY KHEPILLLKN DERIISLNKI IPYLTEEVFI SKDNIMTKIN VENNICIELI KKHEILNTPI EHFFHFTNRE YTIDLRNNDN IYNYTKRILN NKLDFELCNK ILSFTIPINY NICSFPSYHN YFLYINYLKD VKIELIISAL EKAKFLFLKI PNTFNLNTTH ANFNDNDYII EKGILENDLI KIDISKIIHR YICKKYYLYK SDEQINDDDL RQINNNNSNN DISDKEIKMV LMTSHTLSDI IIFPSIIQNV QALKHYKNIK NVVKLKKKIK KRYTEWENWS PCYNVCNNNF SYKCRYYKCT TENQEFCDQN FHMNFSECPF TPC…
	PFL0990w / PF3D7_1220600	conserved Plasmodium protein, unknown function	MLLRVFLYFI LVKIYQCFHL NYKILSKNKY HQNYVKNIHS VNYIHRFQHI KYSQNKNKLF SFFSKFFNKD TDKFKLNKEE KEYLTRIGVN DANDYKLLTK AHEEYIDTVT DIKSKLKYKD TFFFITQKLI QKNLYDFKQK QKYNIFGKDE YTSELSINYI KNSNIEEKFK EHILKKLNDE LSNKKYTFLR IFKWKSALDI FNISTLMLPV TAIGFFLSKM GLFSVVVNML LTSHFLTFKK DEKRKMKIST LLLTAVPILI HSSIGFVCNG LFWEYFKFNI PNFIKKENVL SLFINTQLYI ASLIYFVNND ENEEEEDDEE YNNDYLDFND VLNVDENT
	PFL1000c / PF3D7_1220800	conserved Plasmodium protein, unknown function	MNTNNNNDHL NNIYLEFSLL NNFLKELKEN IKKSNNEKYT NIYDGCVEYI YSLHNKYTAW NYNTEKIDEK YIDYFVQSII LNIKNFLRNH FCLIDEDIES LKNKNKKLME KLKSGVENAE TQENYIYELE KKLIFEKEKN KCSYNLHDKI NNLLKLNEQL TNKNEQLECS SFKHKQENNK LKIELKKFWD LKEKKKKYEQ NKFSYYMLNK KMSTLLKKIN NHIPSHQNNF LNEKNRSYSY NFVHTLKKYI ILRDSPYLNE FNINTYTNNY KKSINNNIND NHKMYNSYER YDNNGNVKYG NKKYNGNEKY DNNDNNKMYY GNEKYNDDNK KYDADNNKTY DDDDNNKTYD DDDNNKTYDD DND…
	PFL1050w / PF3D7_1221800	conserved Plasmodium protein, unknown function	MIFGFLLLNV LLCVLMKNYL CLLKNKRNVF YTIHNLSNEK KKKTHGIFHR RNNGNAIIKL FIINNTSEKK KNYKKKNKED FILNNKKNRK DKANVLYATQ SNFFNPKQFK DLLNQDTKDK TKNTDDDDDC LDLENVENLE EIAPELHMKL MEYKKSEESK DKEINEKKIE DVKDITLYEG LPLLMIEGEK LEGFADTRKV KIKPEISTPF TNDDYNEYIK SSIDEKMGNS DVDETKKNEK YDKNIKKENC SNTKEELNKF EKDIQYILNV SNEEKQKKKE MDKNEEVKKS DELTKEGKIE RYKKVGRHYY MDSSIGKILF DRNYPGYAYT NHGENIDEMN EKSEYDSSVP SYLNPSNVHL RTG…
	PFL1255c / PF3D7_1226000	conserved Plasmodium protein, unknown function	MKVLNFPFML NKRSYFSIYN FFISLRKGGE STLKNDIKHN YIKELLTYEK EKRKMKKKIT EYDGNNISNK HFNEYLKDME EKIKTHNDLI SDDENNKKVK HLIKMNKTEG GIRIKCSTSL IYMLSLKCRY IESIWLNVAK NKKCNSLNCL RDILLNIEWN KYIHYEDLKY IPLKIICTQS TLFDISNLKN EIYKYINEVI LMSQGDQNIL SKVEIIKNIK NNINSEYSYD HLVTSKKFID TQNDIYSDDH IIVQDNNCFT TTEKINIENN LKNIWNLLSV HIHNNICNVD IKFTGKLSPR FYQYVNMKEL KDIPNIEKYE NINFSSLFYK NPKINDEKIK NIVNQTIPHW SVCEEKKKIQ IDY…
	PFL1295w / PF3D7_1226800	conserved Plasmodium protein, unknown function	MSKKYVYWEK QGNDRMCGLH CINSILQGPY YSEDVLASIG KELDEKENEF LRSSSNDLVR NNSFNVLDDG FINISVIIES LRRMNILLKH VYEEDLIKII SSNHQDIGYI CNLQEHWFSI RKIHNTWYVL DSLKSSPLYI KDMNLKFYFN DVIKKYHIFS VQNINPYVSL PKPDINFIPK NINQFYIPTN EISEISGVSD NFLLEDRYNL NKSENYSAFN QINNTPNFRW PENGGRRLND DINTTNMNNV DDDDDLKIAL KLSMEEYIKN MVPPLEETSD ENCINVMVKL PNKKIHKRFS FTKTLSDLFY WIEYESAQGQ DITSSLLFKN NYYLYQLYPR RKFCKYQNGS IELHTGGKTE MVH…
	PFL1405w / PF3D7_1229000	conserved Plasmodium membrane protein, unknown function	MDIIELIEKR KFKYIDKNVK LKKLQNFFFC FLRYNNLYKG KNKYVLKIWK RLINENNYFD KYKEFSFVNF RYVCEFLLNV LSNEINTCPY EKEKEKEKEK EKKKKYIYIY NEIDKNENNT NINKIVNIFL MQFFRVIEYH ADDFLTNEQT YKYLISDEIN NKIQEQNEIC QNKDNTKRVD YINSYENNEF VILKNTHIIY NNTSISSKKF ETFSTNLIIF NHNYEFEILF NIIHPLIYNT YICNLIIDKL NLCNIDINKS FLQYMLYFLY NIYDKYKNIL FFYYMIYKTF KKIKKNIINH QHVLIEWKFV KYIKNKNNHI INNFKCLRRF LLNICDKNTI TNFVNIVFSF LHEQLRQTCS NNF…
	PFL1430c / PF3D7_1229600	conserved Plasmodium membrane protein, unknown function	MHIYFLVIIL FYIYQKFILM KYLKKKSNVY MFYYIPSAEK QNCITYTLNS LKNISPLKKK KKNFLLLKKR DNENLCIDIY TTFNKKRKKR KKEKKIDQDK LFLFPLPYGN YTHYSNFVVN RKKRKHLEND KREIKNNFLH ASSPGHDDGG DDHELVLQEK RKTKKKKKKK CMNYDNMLND ENISDDQNIS DENISDDQNI SDDQNISDEN ISDDQNISDE NISDDQNISD ENISDENISN DDNMLNGDNM LNGDNMLNGD NMLNGDNMLN GDNMLNGDNI SNELVDNYSS LNILNKYLKN KELLEDKNYD VKNGLNKEQM LEEYNKLLQM IKDNVERKKK EWKENEKKDI YEINERVISS SRK…
	PFL1515c / PF3D7_1231400	amino acid transporter, putative	MNLKWLSNIG FSNYNKKNNK QKFVRSRKRF RTITWKYTKT IGPFASFIYL FNQSIGSGLF DIPSLIDEVG WIPVIFGNVF VCSVAVFCSL MILRAMTMIP KNKNFEQRIE YSAVIKYFMS NEKYKFVSFL YHLGNICNNI CGILVISKII DIFIIKLYGY TILFQIYPQI KITKCSLNLL DAMFNGYYYT STGGYERIMI SGFTIGYLIN AIICIHLSSK GLEETINYQY VVFMIFMSSF LYLSVSSTIY LLSQNYIDPS PISSIRNLNI YHKFILNRTH YEIDLIKNYH SYNELNNFKK KLQLHKNPSF HDYPILKCIT EQKKNISNDY LSELPYRKDN LYETTEIKES IQRKTENIFK MST…
	PFL1670c / PF3D7_1234600	conserved Plasmodium protein, unknown function	MKNVLRKYTC LFILINIVLT TYSKVIKRGN TNITSNYLFP NNYDNNSHTY KKRSSNQFYF LENEKNKLKE LWNKLTTRYS IKFHTNKETE NEETGKNNQI SFKNVFNKIS IQDNMEMINN VIIKNSTVIN AEILNELMKQ NKLLTIRYKD INTIINIINN YYASNNYLFS KVLTHEVVKK GKDKTLVIYV KECIVHKILV KIHSCDKEKK EGDSNWDKIR KGFQENDNVE TNLQMDHKDV KLSQHNDKSS QHNDKSSQHN DKSSQHNDKS SQHNDKSSQH NDKSSQHNDK SSQHNDKSSQ HNDISSEHND KSSDHNDKSS DHNDKSSDHN DKSSEQKEVS PNPHIKNFNK DIKINDKESE NIS…
	PFL1780w / PF3D7_1236800	protein-S-isoprenylcysteine O-methyltransferase, putative	MNVKKYMICS FLLYILVLYY EILIFLINKN VYEILEKKNV YKVCNSYIHA FLKYGFVLFY IIVSFLPQRN VYKKRSKLNY IFAKLLLLYF IFFFIHFVIN LFNNFPLNLF YLIIISFHLS EFFLSFLHNK ENANYYNFLV NPNSVYVYFF ILTLFEYYLK IFFFVFLNVY QKYINNQKIL HKVLLINYFF LRNYIEKDKI CTYTYTNQIL IGTSIKVQKN ILPNLNTIQN VYEYDKNSNI IYNSFSSKKY LSKKSPYLLS RPYNQYTQKV KQKYKSLKFI NTLTYTQIKE QTNNNQYRNV NNTKDNLIIN YDNLNNEGQC IFNYTNLTNI LEKYTGKKFY KNFDLNNSFL YEIISKHKHV FHT…
	PFL1815c / PF3D7_1237500	conserved Plasmodium protein, unknown function	MEGFDEMKMK QLQLLKEKMM KNAKAQKSEE VKKSVESVSN ILNVSNVSNV SNVSNVRSVD SKDIRFSVKS GKKIFLDTSF QNKKLMVHPK NGRNIFQTSK NTSFVSKNKN SLLKLTTEEE LFDTPLSFEE VMRRKNEKKK MELQKNNQTN ISEEFINNKQ GSINQNSPNK NNSHLFKIQY DNLNISQDNQ NGNTTNNNNN NNNNNVNVNV NVNVDNNTHI NNLQNNSLIN GNLLQNNNSS YNVDTIKNTN SLNINSFKNF FTQNISSNNE KNCNVGMLNL TFPFNNSCKD EKILTTKSVN GTVFNNINIV KNDDNNDDNN DEDNNNNNNN NDEDNNNNNN NNNDEDNNNN NNLLNKSTFF NKD…
	PFL1835w / PF3D7_1237900	conserved Plasmodium protein, unknown function	MNKGLSKILE LGFFVGSFFF IWYITGEKIF KRKKKIVKEN ILLILRNLCY EIYTVLCETS KTTKHVYDML KNESNTTIEL SRLEEVLLNN GYKKKIEDVE KNVLKRFNVS VEDFYEELKN YEKDPDVQKY LNSIKKMYNE ALLGLQPKLP SIDEKISEDV IINLTSLIYK EKRKIYKTKI DSMLKNNEII DIQNTLSNAQ FFENLHKSTQ HVEEQIIKEN NNLVPNLFTF KYLVSYYSND PNFLQKKKYL ESKHGEKMIK ILKIKTSKKK KKRAHKEDRQ SSNSSVSFKS TPSLDVYNVP HLGTLEKEED HYSQQSKEME HMDKDSHVDF IPHNVDANLD KRDEQIEYIS ESGDMQPEKE YYE…
	PFL1945c / PF3D7_1240100	early transcribed membrane protein 12	MKLFKILYLI AALLAINLIA PSVCNENVEG KKKKKGCPLR NFNFQEFRKK HHKAILISSV VSAIALLFGT AYGIGLHLNN KTFIKSILDL GKKRSASRSP HLKLK
	PFL2015w / PF3D7_1241900	Tetratricopeptide repeat protein, putative	MEIINLLHIT SLSIFLLTLL GIWVYKTLII NKEKKKKKNQ EENEEKKKKE KKEHSNIFFN NKEGEIYCDD EKCYLINKEN KNILLKKRDN KEIKENINVA DTMSSSDMNN TMKNVINDDH INNHYKTMQE NKSVNNFEGE LKNDHLQISK DNQNDNNNFI CYNNKYNSVC KIKTENSLLE NNSNENKSET DNENSDKKIN NKMNDSTIES IFDIKGEDVK YKDDLDNKDN MMNDIKREDV KYKDDLDNKD NVVNDIKGED VKYKDDLDNK ENVMNDIKRE DVKYKDDLDN KDNMMNDIKR EDVKYKDDLD NKDNVVNDIK GEDVKYKDDF YNKDNVNYEE KNNHLSECVN KTQNEYPVEE HTS…
	PFL2130w / PF3D7_1244400	conserved Plasmodium protein, unknown function	MKITILPFFV KISLFLFFFV HKNFIYSYKI NGGFLKYENY NKGGMLLRSS LEEEKNVYTS DIMLRKNDSV EKNKRKIRYS FSPIKTNTLI NIKKKIALNE RRSNFVKNKK YNSMRSGVER RKIRGPPKKD IHKLLIDDIN KERMKEKIYS IKNIDNDNND MKIIDDDNVN ILPLPVEKNM EGYNCLILCK GLPFHVDNSQ IIEFFKPYKI MEKYIIFMRD KKGHFFGDIL VRFINKEQKY LALKNKNYKF LLHRYIQLYN VNEEHYEEYY NIGYKNPPAY KNYVPIKNII LPNTIEDTTN YTLHDNELMY NYNGNNNNYH LVDDHIHSFN YNQDDDEETK ELREKVNVNG IMLKNLYTGR KLR…
	PFL2185w / PF3D7_1245500	conserved Plasmodium protein, unknown function	MKDIKSKNPE FLSTNKNNKK QKDKKTIEEN KDFNNELSKY KQSFYIIKKT INIIKNHYYN KINNIDTLRI REKKKLCYLK RKNVILEDKC TFYCEHVEEI KKIYTEQINM KNEKIKSLQD DLDIANIKSE VEIPKNTENI LKLREEQIER LSVQIDSLNE LYHKQVDNNK KLISELEELN KSVLYLNNKI QEERNSREQM KKKLRFYKRY NRNKKKFKLN FDVLNINKDD IKEMKDDEKE KEDICISILC LLKTELEIID DENKKKREED DEEKEKLKVK SNNFFKKLFG SNYKHKKLGL LENISKKQFF SFYEKAFTEN NKIKFDKKQF FFFPSNIKKK KMNKKYHHIH NELKYNIHMK EIQ…
	PFL2320w / PF3D7_1248400	conserved Plasmodium protein, unknown function	MKKLSDFYTY SKDKSISVFN FKKKEEEKKK KEETGWMKKV YLDFEKTKND TYTYVSIKTH QMKDKFMKWN LRFFKVNHSK YEHFPWYKRL YYIMKDYIYN ILKIKEEGMD TYGGQISPNE KKISRLTSTF ENFDFKNRYA QKQSEDSMIY KYRENLKKEK MNDSYLSERS QSEITRRNLS NEIVSMKGCE SKLYEEMYYN NKNDDNKNDD NKNDDDDNNN NYKNRLRNLM SIGNMTNEKV YSENESKVTH SNTVDKNENY HFLNIENSPK FNIKNTWEKL SGYIS
	PFL2330w / PF3D7_1248600	conserved Plasmodium protein, unknown function	MNSRTYCVIF YGISLLVYVI IIFFLNRFEK QTIPYERIKD IIKIIKHANN NIGIISNKIE DGNIQIKHQN NFLINLNIVS GCANDNIDMF EEMLKSYIEE KIKLENDKIV SSFLLEELNN VQDIFTVTIN VINKDMIKKD TIGVYSNICN KLLSKNMMND NINNNYYLYI IANEKKKKEK KDNLSFTLST TNILELYYNK VEENSINVYQ QYIYITWDVL KNTFLDRGSK TKKKNFIPFV PELDLNFFLA SCLYNKLNYK IGRNTTGGVE MGGVVNDVDS CYEKDCNIKH TDDNEDINKD DNEDINKANN KDINKANNKD INKANNTYIN KANNKYNIHN NRGKTYNPPL IAVWDFYKDF YYP…
	PFL2410w / PF3D7_1250200	conserved Plasmodium membrane protein, unknown function	MKNETQHFFI VCLFDIAFFA VCVCIWLYLR KNRDENKIND NIYILNHQTH SEIKIDNKET VGVTNDDSTT EVKKKTNRFR TFLNIKDDKI VNTEIKYYLF FLKANRNIIF SLCILGTFLV LPLYLSLPRN DINNPSFFHY ISAGSISDIN ILTILYFITL IYSAISYAFI YLLWRKIRPS KKKTKKFLPQ NFTIMVSRID KKEINAYKIY EYFCNLTNNK VVSAYLILDY SIVYHEQKKI FNATKNLKLL KENEEKKNIK RDKSKNMFFS WTSKKKKKKN ASNDPLSICD KNTNQNLKIS KNNTTEGNHM HNSVSMKKSK HAFVENNNTT GNYKTKSDHN KLSSNDNIKN FNEDKKKKKH HNQ…
	PFL2505c / PF3D7_1252100	rhoptry neck protein 3	MNKYWLYIAY VYLLLNILSK CNKIENNNNK VKNLTVYNND IGQYFKKKDI QCKHHIEINQ DSNHNEYSFL SLKASSIFNQ YYVAKLINTL LYRGFHLNVY FHKNVAMYES FSRTNFFFYL TILNKKNVKK IVKIISKAER SSNKRKFNVF KKYLISEFDY PNFEIDDTVK NEMNQAILVY KKAKSDSYWS VMDALKKDGL LLARTFLSVS FVQSLRGIIG LINHKLIDLC FTNAYVFNHV ASFDKLIMNN IFGVIMSYVF KSLLLFFYPL IIPFRGAFAF AISAFCITQL GKIVFAIYKN LRQLYRISYR KIYSIVLKVK LRNEPELKKY AMKLLYGDAL IMITKIWKLS YVNVSEHLNG KNV…
	PFL2575c / PF3D7_1253500	Plasmodium exported protein, unknown function	MNFINFKIYI FFILFHTFIL SNTNIPRTNN NKNNNQKNVT NDTTPLGTIK DIIALDYIRD LLKHIELIKD EIIKDKLKKI KLLKNNKNLI KKIENLEKGL IATRLLCKNY IKNELKEIKI IKDQIVNEKI QQYRGKKEKL IDTELNKLFL QEKMKKDKNK YEQYMKKQLQ NTLLQKGILK TNGIILKILQ KINNLFIEIT NDNPKVQLTS
	MAL13P1.25 / PF3D7_1304600	conserved Plasmodium protein, unknown function	MLKHKYALYR CIRTILISLL IYIWLSKNVM TYNRNIKRRN NICFYIYNNK INNNIYDSTF FNNIYKKKKQ NKKNCHVNKI RNQHLVEHIY NNKDNNKDLS CENDLLKHLE ILYQQFWERK LEPFKNVPKE RNNINNDENK INNFSINNLY HYIQSTHPSA LQNVKFIYQD RKKYTFTKNK ISEAFINNAQ VQIEPSLLKN FTNHEDQNNC DTQNEITDDN NNNNNINNNN NNIHNNHNNN YNNNNHNNNN NRCNDLVNDS ILCITTNKDI SKYQKICSIP NNYIINYDNI IQEIQMFVNH FNNNYKVNYL KYIFKNNIDE EINKLDSITI LLYDIYKKHN YFLNFIKNYN SSSIYLKYWD IKL…
	PF13_0025 / PF3D7_1305100	conserved Plasmodium protein, unknown function	MKLWHLLFEL TILIIIKIIL NSSNLSIVIC FMNGNYLNKT YTKSTHNNKT YNILNINKTK DAFKLYMTKK FKYKYRNTLE KRIKKGKIRN EIYQKLKKKH SAYIVITEKL SKLDPNQEYF KYDKNILKEY ENIPDIYKNK KLGRKFNQYD YWYSSKKKEA KYNYSRHVNF AITENKFNFK NVFSYFHILE IVHEKFKNNS FYINGLQSFI NKYYDPITQK RIKFYDKIKE MHEMKNKKGQ NINDENINDE KNDTDNNAKK KRDNISNNNN KVDIDKDNAK DISKQNNDTS LNEELKQYEE QKERELPSKL DMFEIIKRNI DGYMYSNEVN PEDSSFTLFG SDTSCLVKKK RAPVAYNINC PFR…
	MAL13P1.26 / PF3D7_1305300	conserved Plasmodium membrane protein, unknown function	MEDQFNHMNE FFQFLYSDKK KVKNDDIENI KNYMQDVILN EKEKEEEFYE CVNMLFFTNN RRYIKSHISM CLYYLSMLVY NINKEDGNDD MIKTKIYTYI LKRIGDGKSL SYYDRCILCK RFFIFCSNNN NIIEELKGNK DFYLLFSNCL TFLNSLFYTD EKIIKLNKKF KRMKKDIINK LVHNILRQNI CHLDVDKSNK KLVIFNNNNN NNNNEIVSYN TNNTSNECNE NLKYFVSIFI NETYRSYLII ECISLFLYTY GHLLNDEKYK MICIENFENL FFQNLLNTNK NIPIKFIKCF KYIFEHTRNE NIFDLILKQY NRYDEIALIN SLSFYYYNKD LFNKIHFYKL LDIVINIKKK EKE…
	MAL13P1.49 / PF3D7_1310200	conserved Plasmodium protein, unknown function	MKIQYMIIIY FIILICDNFL NVNAIRKKSL RNNINKAHNH HENIQGNTLS NFEIMKEKNN VSNIQLNSSK FFDILASTSL MRNSGGAMSQ GPVYRVVQNI HDNNENIGAS LVFVIFLLLV VFILFFIFYF IFKNHVKHVK FMNS
	MAL13P1.59 / PF3D7_1301500	Plasmodium exported protein (PHISTa), unknown function	MKLLIEMNHI FFIYKILYML KNNDIFTLNI ENYKKKKRKN WYKISIFTYL LIFIISISFI NLMTLYENRI ISSIHFNNKY ASILDEYEND YYSSLERRYS KNSIRNKKDD ESRNLHNNMN KNNMDNADMS KNDMYIHNKH NDSGYISKTE SNDSLNLNYN DTTKPLTKEQ LFQIINSLKE IPSDEDLENI WKHTISVAKE GLGRMIKKLY FYLDGYMDEY EEMQKQKCFC FRKEISEDFM DEINETLSSH EKSYTYKFYK LIRKKRTVEK LKNFIFAFID KMEKIINYLY HKHKGIYIMK VLKLHKLI
	MAL13P1.61 / PF3D7_1301700	Plasmodium exported protein (hyp8), unknown function	MSFCYVRTIS IALFLFIFLF LNNGNFKNNF YRKDNKYSSI KIRSFRSLAE NQKVETEQST PAKPEPTEFV NNDIHQNKNT FKKLKNNEKK KEILEEKMKD FVKLYVNKSS GECQRYRLQQ HLKNYSSSNE YKKFMNKFVK FLKVHNDLNA LKSQLHFNNV RAATIIFIAG FLSIFAILLT ISAVAATSKF TNNMLAIAGV GALGSALSLP GMALLFVPAM LYVLNRKNEI TNHYSERIIK QVSNF
	MAL13P1.62 / PF3D7_1301900	Plasmodium exported protein, unknown function	MKIKKKIHIF MYIYMFSLLM WIMKLSINYN FYEVYKKKYK VQYIPSTRSY RALNEIEDLR DTKKPHVKII LLSEEDKKND EKEKIKEIIR HYRNKLDNEV KRKMYKNVNN HYFRKGKLNK T
	MAL13P1.70 / PF3D7_1313800	conserved Plasmodium membrane protein, unknown function	MMINQDIKIK DKEMVRTYNL LGKNYHFMLK EYDNLCSINI IKNNIINFRI VKNLLAINNL IDQVDKSLLL NIFEENVDND LLLVLSKNNS NFILKLLAIF YIKLSKNTKF NITNHFNRIF DINKNTSNTS GELKNIPENL FKNAIILISL ILYHLPVRLS YHIPTIIDYS KKIRKSDNLE LKYFYQKCIN SIIKYGKLNI SECDKIFKYL KKSLNDKDFF IQYIALKCLS NLFILHPEYS LLEYEYFINH IIDNININNY VSVVYLKYVI RFVSIIFCNC ANVNYYNSKD NDGTNKKHID DIFLFNLNIM KKKKKKYSDE DIRDEDYIDE KKKSYNDNNN NNNLKSDIIE DNFNNNINNN INY…
	MAL13P1.75 / PF3D7_1314700	conserved Plasmodium protein, unknown function	MKQYLSEQER LKLKIRNNYF EKNAIRSKIV NYLNRLTDLS IDHNVEDIKK IKQKRISSNE NLDKLPEFKI EKRPKLEEDE TTVNRNKRLL QIGLFDHLRK AKDALEQEKT DEKIIMHNLQ NKRVEEKIHE VKRNFEKIEL DDIEIKIIAY VKDIKMIEEC IKQDEDKLMK LNLISHYEKM KNFISTNTYP TIFWCPLKFN DKTRILQQNT EEFIKKKIDA IKSTNYQVEF KDENWLDEFD KLKRIIKNKN KEYFKNKSDD DQNNIYENDI VNKSASHHND DLEEKKCISV YNQKSDKRSM SVYSLKSDEL NKDDKKNNSP KSENDNIVED KKYIRDEQNQ NECDYKNDDN KLMVCKNEES VLE…
	MAL13P1.87 / PF3D7_1316800	sec20 homolog, putative	MNHNFKRSLD INNKNVDDNI NKINSIINQM RLVDENLKSL FSFEETLNDH DALLLFRGRV SKRIVDYSNL ITECDNNLTC SEYISPNLKE QYEYHLKNID NYKRELSVWW NGRANDYHRL CMENFLNRKI SDINVTSNDD DRNKLTDINL KDTKKLMIDE INRMKNVKSE LIESSQKLKK QDEIFNIFEM KIRSSAKLIY SLKKKAESDT RYVWYSFFFF VSICVYITMR RLGLLRAMFT LIKLIVSILF YVSKLCFKIF QLFKKTNEAK YTPTVDNSKS LVLVPINNEL
	MAL13P1.114 / PF3D7_1321100	conserved Plasmodium protein, unknown function	MNFFLFFRNI FLLNTIIFIL NQYIKRKDYG SRFFIFSLKI KSSKEEFTKN VHRKATNTKE DKSAYKNEKK EIPYRNNNKR KDKNKKGNDN KKILEKGLKD TNSNIKSSTS SNTISNVSSK LSDNSNISNT FTNIKIQKLK DKHNKKNSDI KNVSTDKKKE NDNNKKNNNN KKNNKKIPII YIPFNDIKNS PYIRGKLKLV YVKSFYEECQ KELYEAKFQF FKNNKIYIST FAVVKNTLSE NIDQTEKWVT ADMKILQKNS YNISVTCNDS HEKQIQDISF TKQEKEEFEL MRKSLKNVVN ITYDHFLYNI DTFYNAKRKY LEYINFFFRN PHIKSNMDIK KNISSNITIQ KDNILLKRLG SFN…
	PF13_0125 / PF3D7_1321900	conserved Plasmodium protein, unknown function	MKVKKLVKFL SLLAVGLLSN KITKQYGFTP YSFNCNAEII RRSSYGYNQE ILNDSVNLIL ENTHKNKIGI IHKSIRELLS GRYNSLNPQK VLLRISNIIK HGHINSLCDN NQSYVLIDIP HIIFNANLIG DPKLQRINYL INNILNNLDV CSSKRKYNIQ LKSNVTNGCL SQSDKDIIFD TTKPSNSRSK GLQLSPSNKF FSILLKCSVD NLGSGDSTME CVQKELAKDN KKMSDTCSQC FKDSVSCGKS NCWLPCLFGS PCSDRCYNCG VKYCNKELIR CTGLENLPSA CS
	PF13_0134 / PF3D7_1323600	conserved Plasmodium protein, unknown function	MKNHTVFFFF FFLVHIFYIF HIEGIYINKN SLTNDKNILI CDNTINGKSI KINKKKKTTD ILPSHMEHRI KNKSKTFFID GGKNMHVFSK KKRNVHNSNV NDGRNSNVLY AENYKINLTE KPLIEDVPRN VKGRLNEWIN EFDENNTLGF FPILLEEMSN EPSPLQVGFE DYMQFNGEHV EEIFKNMTRE VVINGEKKKI FGMCFFNHKT GVLAPLAIYA EIKDVTKVGN NLAVKGLVRG RVIIDEIISQ EPCILGKISP IEDKKGLVEP EESLKIIDEI IRIHTQCSNM ESQLMEQLDQ SFASMNIKLR NDLKESIDAK LEKFQIDPSD VEQRQAFIQM ASFAAFDFHL MIVDRYDALM LQN…
	MAL13P1.131 / PF3D7_1324100	conserved Plasmodium membrane protein, unknown function	MVKSKCENNE NCRKIINKKI IEKKYDKKKT NENMNYVGTK HVLNKKIINN INKKDNEVYN KINDDMIDEE YIPNNIEEDE EKNKKKTCLK NNDNINYDIF NNISKNLNNH LSQGVGNECV KNLITQVSYS HLFTILKNIL TYLPFSINDY LIGTLELKEV IDSKYNTCFQ LYEKKELMKY IYDNEATNLV NNKVYNLFRK YKIIKNKKES FNHRQIFHFK DQNQQPILEE ILIEKAKIFI YKINSFIEGR EQNLSYIYEI CYGLSYKTET FLLSVFIFDC YIHRINQLTN KNHYKKVKLL VIICSILLAL IKTQVFNGTS IMYLNDILYF INKMKNDKLS YTCIEISNKQ MEILKLLPPN YNN…
	PF13_0168 / PF3D7_1331400	CPW-WPC family protein	MKKLNLLIGC ISLYSIIFYT AKISCTVQVK NGGIENLASS SGLLKNVLKH SPRISEEEIK ESEIKIIKNA HEEEKKILDK YGKCLKDYTL PCPNYWKRRT DKYGKNVCIA NEEYNGFCEQ VQIFDEFSEH EKMSYESSCN VEWGCKGSSK EICESGKRDY NVPCPEGFLV QNDNSCKADI SVYRGMCNNE TINFTHLTSS EKENWSIACE AYWPCYTDCI SEEYISDCPK NWKQVNKYDC IPDKNYKGPC RNIKNFKYFT LSMKKDFEEK CKTKFECNNI CEKNYEQECP LNWKVEKGYC LAPDTFDLCK RKKISIENMT RKEKENIEKE CFVSWPCINN KNTNKPNCQI NWLADCPFGW DRK…
	PF13_0172 / PF3D7_1332100	conserved Plasmodium membrane protein, unknown function	MIDYVLKNPF IVSLVISLFS VVLEFYTSLG KFLRAYFFSF FCGIIMNIIC EFQRDDKIYD TGFFLKQTLS YSLCISIMLT FSFIKKKVNN IPFLNKSPIC TTEFYKNTYN YKGIKNISMY NFIIESRLLH FGIAFFFGAI STIIGVVMSY ILIKHIFIKN EIDIDSYYLK NIACCLVSTY IGGFINFIEV SDLLNLNTTL RNSVFILDDM FTNIFLMMLP LCKNYGKYFY CYNDNPLFSI NRKEQEGLEK QEEYIKNKIY NSLILNYDAD EEQKLINKKS LFTSYGSFTN HINNINYKER HYIESPYFFI YNRIHLIICD FFAIMLIFFL TRKILNDFEY LYKHISFYIN MDKIKTPFLL IIT…
	PF13_0182 / PF3D7_1333200	ubiquitin-activating enzyme	MNILCIHIVY CFIACLLLCN INQVFTLHVL NYNNGYLYKN LSFSIPLYKN LFQQKTTCKK RKQLLHIKSR GSTYNECSKN CDAYFELNKT NKNITKRIGN IPNVLRKEEK KGRHIINNTK ESNNENCRYK EEKNIIINEN GDKSFYQGDD IEEDLFNSNL NILESEKKYS RQIYTHGYNE EKKIRGSKII IIGLNGISCE ICKNLSLCGV HEIGIYDNNL LTYEDIDNLY LCNKKLVNEQ IKSISCVDNI QKLNESCKIK AITTNLYDNI LNYDIVVTVN QKTNFNIKLN NYCRENKKKF ICVNTCGLFG RVFIDYGDFY YTNNIDTNTT YDNHNNIISD LYKINNLEFL KNNTIVLSYL PFY…
	PF13_0191 / PF3D7_1334300	MSP7-like protein	MQSEFFICVT FFFVLLHYIS CNKPTRNISV KSNKDKDELN NIKEKLDLIN NSIKDKVIEN FKEDIELLKK KVDDLEKRKS DNTLGKRQKK EDDDDEEETD EDDDEDSDED DEEQEELNVE PKEREDEQEE TDDEQKETED EQKETEDEQK ETEDEQKETE DEQKETEDEQ KESDDEQKET EDEQKETEDE ASEEYSDNEE DDEEDEEDDE EENEENNDNE TNEENEDNDE NEDNDENEEE IEVTDVEFVG QSTNKNVRNN MIRNSNKDIK SSSQNSSIKA QNSSTKIGNT PTKLSTQNTK SNSTSNQLIT QLQSEKSSSK VDNNKNNTNE IKYMDKLCDD VLTELKEKDN VDNNMNHSKY NNL…
	MAL13P1.193 / PF3D7_1338600	conserved Plasmodium protein, unknown function	MFFFMYSKEK KKYKNVLLIF FLYIIFFVSK SYSGKTLACN YSLIPFHIKT KERLPLNFIK NDLYEIKRKQ RRKEIYSSNI TKTFENTIPE EYIKYNIPEE PIYPYISVPN NLYTKTYNEN NNDNVSDKQE KDKNCPKLTH GIKKMSYEEY KKWNEEKMKE SKDLPEPTID DYIEDVEYEK YIHPALIKNV DVNNPRYSLY FLKDKIKNDT DQCATLNCFD KNDLEDDLTE YDAAFNGIGP WPSTEELIKH QNNIEYDKTD MEMEYNITYD KTGYYQYKEK LINEQMKGII NKKDINKNVS ETLHKRATTI QKDPNNDKEE NNKNCMYKTE SKNNNNSNNV LTNDDLFDLL HKEKNITTDD IRK…
	MAL13P1.212 / PF3D7_1342500	sporozoite protein essential for cell traversal	MKMKIPICFL IILVLLKCVL SYNLNNDLSK NNNFSLNTYV RKDDVEDDSK NEIVDNIQKM VDDFSDDIGF VKTSMREVLL DTEASLEEVS DHVVQNISKY SLTIEEKLNL FDGLLEEFIE NNKGLISNLS KRQQKLKGDK IKKVCDLILK KLKKLENVNK LIKYKIILKY GNKDNKKEMI QTLKNEEGLS DDFKNNLSNY ETEQNNDDIK EIELVNFIST NYDKFVVNLE DLNKELLKDL NMALS
	MAL13P1.217 / PF3D7_1343500	conserved Plasmodium protein, unknown function	MCNLFLNRKI ILCTLYLVCL KFGHVLNNGI VKHIHFYKNV NRDEKKRKNL YRQPLYILKY KIYNKKKKFK LNNWYNCDKK RPERKLEPYE LNIRNDKKFP KYSKKPVSPS SNLNNFSPFK NIINSFQPVD HNIKNKLREE GFQFESERKE TNMFPSLDEI IKNGDPSTNM HFYRRKKLKS LLYSDPLKFV KGRKVVEKYN RSVPEEKRLN YDMFRCDIFY VHSDGTIMNI EEDRPPFDKK LEESDRYKEP RYIISTAPGH AKENNLKIGD KFPIINEENK KKIFDNHFAR PKKMREPLIL PDGRKIP
	MAL13P1.254 / PF3D7_1350600	conserved Plasmodium protein, unknown function	MNRIYLFVFL FVCCFVSSVI GMNVVIPRNK ESRTKRVIKG IKKKYNGFTE RYRKSFHLKD EDVIGAYSMQ AYYFFDKNIE HMFKWRLFYN FCKKSPSPCN YFKLRKEFKR IYEGSTFTLK KYVSEVNIIF NQFIKEYSTV RFNVDLKQNH IANLSYTPNL TTQIMKSLTS LINDQLMENE LKNPTWKLSF NYLTGTKVLI ITVPSAVPGL NFFIYYYITT FKYYYSKLFG TLGNIYFRFQ GSIKKHNVGY FSIERRYERK T
	MAL13P1.255 / PF3D7_1350700	N6-adenine-specific methylase, putative	MIFVKHIFLL YIISLFLNNL NTLCNSLKSP KKKHIGLLYK LSKRNNNKNV AIKKKLFVFP LCFIKVYPFI FKNKVAFQNV EDNYVYTLKR MERNKWRMQD ERKVIQNEQN VCNNTNKGFS DLDGNSLDAA RYSKNIVENM NHTGYKKDSD HNNENINKKD SNHNNENINK KDSDHNNENI NKKDSDHNNE NINKKDSDHN NENINKKDSD HNNDTINKKY SDHNNDSINK KYSDHNNDSI NKKDSDNNND TINKKDSDHN NDNINKKDND HNNNINACNN NGKVSSKGKK RIIETDMYGL PKEKLNIKRQ TNKNIKSKYG YCKIKTYNET INVNYRKKKI LSILEGTLKN KRLYSPDTYT RPM…
	MAL13P1.258 / PF3D7_1351200	conserved Plasmodium protein, unknown function	MNLLVICIYY LFFLNIEKNI SCSCSTTKNK STFVSLWDKF RQLFKDKEIE KEKNIITYNF IKHYNDEKYV IEENKKNRYF TGYEINHINR LIYMNSFKTY ILSAYIPYIY MSVRDIYIVL KKIKELNFNT VYTFLFWPEN EYLEDEYDMN NSKLFYLLNF CASNGLFVIL DIGPYINNIY NSNIPTYILF NKKLNDYIRN KYIERKADLY KYFLSPWENI WKRKRNSLIK ETRNLNRQII EKNINNTKSF YKKNNYTYNN IYSLYYFNRV IKWYNYILPQ LKKYMNINNG PIIYLNIDKT FDNYYMYIII DLKRKKIFNN ICNAQHYMER SNVSYYNNKI IDHDNISSIN KSSSSEFFLN CVI…
	PF13_0277 / PF3D7_1353300	conserved Plasmodium protein, unknown function	MDFFIIIFIL LLSFFFFDYN FCSRGLVFYI GNKSLKLLKK CNNLEKVYRS TIYLIFPFLQ HIFVHIFYYY IEKKKEYLNN LIFEQSKEHY DIKGQKEFEA CNFKKEDIFN YIIETSIKIK NYVYNKALHI FFFIVEYTNI YENINLNCHI NTREVLNNNN FGVVIIDYYL PNTSIKKKKK KKKKDQTYNY INDSEKIDLY DLVNIKQEKK IKFVLIDNKW KHILGLGKIE DPNVQHLYLQ DTVLIQYLQF SWIFKNHFFK KLYNDRDVST HNYYEIKKNS MQQNDRDGVK EQYKKTCLGE EELIVDGNTC NNNHLNDHVN IKDEEYFNNK NYMNDQEEII IRSLKKWNIN KENVCSNKEE NFN…
	PF13_0295 / PF3D7_1355600	conserved Plasmodium protein, unknown function	MNNGSNKKFV IVHYIKGEDS NQNKSNSKKK KEKKTGYVTI EISRVDDRKF ANKKRKNQLM LDKIRRNDFL SRSAKNISKK KIRDNTWTNT LIDKLQGATT TINQKITSFF KICIFNSKEL KMKNDMIGRD SFKYFNTEDN EQFINSANLM NAMNVKMDNM LSQHININKD NFNFNNFNMH FNGNSNINNK FMKDNIFNGN NLNNKFANKK MIDASKIWKK DIPANNIMNY VDKRKVDANN NPDMQNIKNF YISVINKKSN VKNVRKVSLM EVCKDPYFFI SQNFLSDLES YLALNHCLLY IKKNKGELSQ IHHNFFSVLI NVDDVHFLEE NVSTSILIHT IKRLNSLFKI PIDDITSVEF CLY…
	MAL13P1.285 / PF3D7_1358000	patatin-like phospholipase, putative	MVKNVYIYFV YLVYLFHMFS LSLRMQKNIF KYITPLSNRF NLTKIRKLKL FRKEKQKKQV RVFNHVVNNY IGLDLFFTKL NNITSNHEKL NYINFLQQIV EDKAYEHLLF SNNYMRIIIY ILNEKCLVIK KNEEKYDDLD YEIIYRILLI FKNLTRYKSF YHVILNDYTH KNKKISLLYT LMNILNEKND FNNYSNNNFD KYKEYNSIFN YFTSFFKNAE DTKNYMTQDS STELDSKMKN EEQEENEKIN EINKMKNKIY DIGRNILLKL KDEKLKVENK INSQYVRGSN HFTNETSTDL KSTKDQEDIL LEEKKKSDDE YVDKDNYNTT ENNFKQEHMN ITHKNQNNQD HLYDDTPQND NIS…
	PF13_0312 / PF3D7_1358300	rhomboid protease ROM7	MNIIVNFIYI YILFLSYYKK GNCFIHNKIN YEKSRSFLTN STKIILKKNG FKYYHLKHKK IIKPIYSLKS SINNIWNGIK SIKVKKLLGI FKSEELKRHF HNYNLSYASY IFNKCRLDRV LISINVLLYL YLNRIDKNEE RKIYFHKGNL IQEQDEQKCE KYKCNYNDVY KNRNYKTFLT SIFIHKNILH LYFNMSSLIS IYRLISNVYT NTQIFLIFLL SGFFSNLISY YNHFKKKNEE IYLNDIIDQN YINKKIFNFK NNKIICGSSS AIYALYGMHI THVIFFYFKN HYVINTSFLY NFFYSFISSL LLENVSHFNH IVGFLCGFVF SFLIIAFEKN
	MAL13P1.300 / PF3D7_1360300	conserved Plasmodium protein, unknown function	MSTFLFNKKD VILYFAFVFF SFFINYNNSH IFNNDDRKLK TLFNRICHKI FSSEHIGNVN RRNGIVESCT FGGSEKEKKR NSSTFECINH KLLKKSKILF YIWSNNLQKI RVNEIMEKEK IFIDLNEEYI YLKKKERKEK THELNYIDLS TFPTYCSFYK LKVQDLLYYD KKINYYSKRY FIKTDHLNSD PLNENATIFI WGNKYENLQN SKNKIYKNFH NILYYYITIL MNNILNHTFY FVFNMNKEKN YENFIIYKNK YIYPFKNIQL NYDKHKDINN IISLKNSNVQ NNNETITDFY LVEICHSLKG ITFKQNHNIL KKKLNNIYFN IEFVTYIFQF PPVFYHIIFI IFFSLLITYV FYK…
	MAL13P1.332 / PF3D7_1366200	conserved Plasmodium protein, unknown function	MSNVNKEKRL LLLITRVNML INLLQTRLAY PLIYPFNTTA LNNEKSLNLY LEKLRKEGNF DEQTFMKSLG FITPSIICLT KLVYILKAGY SLCKYTGVNN KMIYIERKNN NKKVNLLNEH EKKLHLLKPQ VWRLLKPNDE MNTKHLKWRK
	PF13_0355 / PF3D7_1367800	secreted ookinete protein, putative	MKLNTLISFF SFVCLFFRVL SCEGIHEKKK INLKIELIDK DVLLSDDHLK KEKVIMQDGR KIKIKNFERI KENVLERAII VKELDKLKYI NTKKEAITLE TLDDDNDDDE NNEVSSNDEN NNDENNSNEN NSNENNSNEN NSNENNIDDS QQVDEEQHNM KVISSEESVE NDIHMLRKVY QRDSENGSTT YCYMRYTFNF NLEKLNENSR SQLFKGLDKT LDYLSFLPKN EDVTDTESIL DNEYKMLDNT LGDTDPIVSN VELKNYNFDI ISTSEYADTI DEIINFLNTR KDQLNISTSL KYKLMEAKNN LNKYNNKDML VNNPRDSNLY LYEWLQHLNK AFLEKKKALE LLNDTKDIKE NYN…
	MAL13P1.342 / PF3D7_1367900	conserved Plasmodium protein, unknown function	MRKYLCKVSF NVIILIILFC HIIIARNNKT IKWIDVEKDG KIFNHIVRYF IKDDKILKIY TINNNIIMEN IDDDYYMNNK ESLLKNNDKN DDNFFNNIVN NKVPLSFLIE MFYGYGKKEI LSYSGMKTFK LMCNKICNLE ERNVVNKCPY YLFRNLIYNF IPENAFIKKD GNNERVNNNN MYIKNKKEIP FKCSSYIFFL DNILSKNQKK KEECIYRMNH VNISYTYVEY EIKDTFENIF FDVIKYISTI MEANRNIMNL QNYDNKEYKM FIELNNIILE KESKLKHVYF YNTLEEYIQS LDGINKIFAE DIIKEIMDIY SNKNNDNVDN GKSFFRTNKF IINRRSNDIN YNNNNNNNND IFM…
	PF13_0361 / PF3D7_1369600	conserved Plasmodium protein, unknown function	MKIILKITLL FSVINNLSIC FRIYGGNNKG NLFLHSNKRN NILNRNKYNT NKKCKSILYN KDIENSDISS EEKEALIREQ IKKEKEEYEK IKQENKDFIN NNFEYISNNI PINVEKRYAY EKFKYSHELL TYIFFVINLF KHEQFKNKLY KEYLQKQASK ENKNVISSHK NDKEHDISVL NNTENDMVHI QKQRNHNLIS NFIHRFGDKF KFFNTPEKIQ REDLANMFKM EQEDKEKFFK KIKIKNEKTN EYYFVIYYCN WKYECMALYN AFHNILNNNY NNINFYEILH KQDEEKQKSE LDDDEQEIGS NKKGKKKIGD ENDQQEEDTD ENDLTKKDIE QIKQMYIKDL QSNKVMDMES LLN…
	PF14_0014 / PF3D7_1401200	Plasmodium exported protein, unknown function	MFPSYIRKFS FTLLLCIIAL SCNNNTDIYY LTKYKNFPIV KSPHIRSLAE SYKQYKINSK YDELRTLGAS SPQKRKPSKY DDIRCYDQPK QKQKKPSKYD DVRGFGEPAQ KKKKTSKYDD LRRFGVPTQK KKMPSKYDYL RTLKEQNVNN KWKPTTNDDL KLLSDNYEKE KTEKYKLLKF IKKKDKENSE RQKHGLPPDM SFKGLSSKKE TEEYVSSDVG YTIKKGILKA LKFTWRSISF FIKLIFFGLI SLLFWTCRCI SCLF
	PF14_0030 / PF3D7_1403000	conserved Plasmodium protein, unknown function	MESKNNVLQV ESVGVKLQKN ENSKQTYTSK LKKIEKKFNK NNKDGSSSTL INNLHNNNVK CKNKKHNKDE IDITPYHDPK KKTSQLLNIS HIDIKKKMQK NEQQNEQQNE QKNEQKNEQK NEQKNEQKNE QNEQKNERKN ERKNERKNER KKKYPNNNKN KENKIIKIKS DDYYLNQLVK KEDTYTQCVE QKSVENNNIN TYYNNNNVSN ILYNKQEYHT NTNQSRDTND HDIYNTHIIE HYKKITKQEH EEKKRKKIQE IKAKLIKKTT TKNAYTQVVL DEFTKFYESI KPAIDKIVED VSYKALKKIY EERELEKIKK NIDFYENIRN ENYKSLQVCQ ENSEAFVKET KKRIKDRAQL KKN…
	PF14_0031 / PF3D7_1403300	conserved Plasmodium protein, unknown function	MKIQNYLKQM KNEKNIFYYK EEGNDKIYKY DDIEKNTYRR KENKTDIYLK KDLLFQKCIL YKLRCLNNTS SWLLELSKCE KNKEDHINYN KKLIDNIKFR KPFSKYKKII SLFYKKKYKE AYNLLCQIST RNSSQLLKSN LLWKDNFFVK NKYNLNGLIE RIDFINKGKE VCEENHKKDE KVKGHKTRIN DRANITILDM LQRKGKYKKE DKIKEIKRKY HDDIIINPKY MKYENKINRR CNNFVLYKKC SGFEYDFINI ILHNNDYNTF PTQESNKCFV DIHNKILNKN KNNIYDDTSE GDMCYIYKKN EQFINHTKNR CINKKVKIKK RNTDKYHINE NMRFYLYIKM LCLYMHSHSY SIY…
	PF14_0040 / PF3D7_1404300	secreted ookinete adhesive protein	MKNFTCFFLL TLLLTLAYGK GVRNKSENRT PYVHYHNNSN IKNYSAVDIF SPKKTGKECI KCLPDNFCEC ECSCKNKTGF SMKYRHASKG SKGYSKKMTK TSSRSRQCND LPLEKSEQET EPELEPEVEP EVEPEVEPEV EPEVEPEVEP EVEPEVEPEV DPEVDPENDQ GTGSQNNITE CYSSCKSVTG VQTEECSCSC SC
	PF14_0061 / PF3D7_1406400	PPR repeat protein	MKLTYYYYAF CIIKVIASLR LDSYKKQNVF FLKAFFKNVI NIKKERKKNL VNSFFYVGRR NKIPIKYSNN EFYNIHNENY DNTKYYNNNN NTNDYDKKDN NVGKRKYSRK NMLYMNSSEK DNFLNENILK KKSSEKEIEQ SLTPLNMDWV KVMNLIYSSN DIDATTLAFN AAMSAVEKKG CLSTMLDLIG TMKSKNIKPD LVSYKLVLSL CDKYHLVDTA EILFEEMIES DKINPNYEIY AIMISCYAKT GNGYKAIELF EKLRNDPFVE EMRSLNITNT NDNKENSNDL QTSIIHNNME DNNNNNNNND NNIYDDKFKH ISNKIKNVEN CSGKIQYSEY ANVIYACNIS NLYEQGIKYF EEL…
	PF14_0071 / PF3D7_1407400	conserved Plasmodium protein, unknown function	MKRYFLHNDK FYNRKKAKIE CEFNNELKKE CLTPNFYDYQ ASSKNVDDEK DDINVRGFNL FHLEENGKRR KINILNIFDN NIKKKNETDI KYMNNQNNNN HLVRNKNEEK VCQYNDPDLC NENIDCYMNN HINHKNLYKS KDKLDNDNLS YDKMEYGRKE KWTNIKNKYY EKINNLLKDM HMIKLARNNG KIKM
	PF14_0088 / PF3D7_1409100	aldo-keto reductase, putative	MKYKKRLFVI LFITFYSTYI CNILCVLLKE SSYHNINHIP KYKSIKNSKN TYKKYTMNNE LNLSINKNKN KRKKRKSRSY FITNNYILHF KPFGYNKNII KYNHISIVNN KTNYEIYNLN KNKQKLYSND LGKEQDKKKK NTSKNKTETR NTQTNKADKS ILSTEKKTSK TKSTLRKNKN NAKKKDNITI QANNEENKEI KQLQFETTEN KDTQKKKKTY KKKETDNIEN ADKMEETDKK KETEKNKKKA QNKKTAKNKK TAKDKKTAEN KKIAKNKKTA QNKKTAQNKK TAKNKKTAKN KKTAKNQETT KKQETPPNEE TDKKKKPTLR KNKINESKET LNLQLINKNE ENQNGKAPTD NEN…
	PF14_0094 / PF3D7_1409600	conserved Plasmodium protein, unknown function	MNYCTLLTIC FFFCLFLTNV VYEYVHVLNS KKRKSRLEEN NDKKKLFKFF LHILILKQII FESFINLAIK MSILLHVVKR YLTYNKKNYI GYIKNEEDHD IKKVDNNNNK NKNNYYLNNN FNDKKEKEKD TKDEKKNKKK NKINYPNNDN EIIGNNNNTN MNEIKIYNNN FINNDYVNYN NILKNNTNHL ENKKNVKVKT IYFIRHSESV WNSVFNKEMS TKQFLKMFMV ILYELVFLFS KKSALIDSPL SNTGIIQSIE LSNFLLEGRT DFNDEFCEET FNHIEYINDK NKTNDNNINN KDEYIINNNN YNNIDLYKLS KKKLKKNKNS ISNYNKKQEN NDILTTNNND YSHDNSNDNH KIH…
	PF14_0105 / PF3D7_1410700	conserved Plasmodium protein, unknown function	MSQLYLVCVI CCLVYYVRCI NVQIGNQKYS LCSNKIKKDL LDFYNTLGVS KSDKNLKDNI KKVNLYTKFR KRLYKDRLSI YANVSIKEKG EEVVPVKVVD EKENKENEEK TNILDQEIFT NFMQYNKNNF FCIDELGLDI SIPFYKNSGF GANVVYQLPE MVYVNAYTNI YNTIIKGEFN SIDILKRISF FQFFDNFYLN AHYDFKSEKA LLNLESKLYE YYNKHGDNIS FNNKIIVERN MHNEYDGSVC LSLKYNNNVF TPIFNFKDKT YEYVYDNLSA NRKFSVKVDK ERNVHFNYLS FDRVDESNKY FLFFNFIFSN PMQSIITLKR EFIF
	PF14_0165 / PF3D7_1416600	conserved Plasmodium protein, unknown function	MEKSSKLYLL QEYMKEYNRA TTVPHDSKNK DNDKYLSLYN DINNEDQYIL NPAIIEYKNI NEMKNSVDMN NYLSTKNLLN ETSKFDDNKE EIYLRNGSLD MEHIKYGNIQ DINIQDVDIE DGYIKDLYIS NEQFENKSYP NDISRKVLIK ESKKDITQDY NLKDIKETEK NRTMNKSSSY KQYNMNNCTR KNSSFNYNVT DNICHGNEKY KMSDNKQICE IIKKKEQLII DEICTMVKNA NKKIKNQVEE YKNKNVSVIN RKDNTIQNSD INNTQNILHR NEDIEEYKLN ENDIHNTVKI TKEVYSSNSF SSNSDTTLSY ESVNNKKNKE EIRNHSNNVE GLRDLTKEGT LIYKSEKEYT KND…
	PF14_0249 / PF3D7_1427000	conserved Plasmodium protein, unknown function	MVLGFKLITQ KKFWFFIYFI FHINGIHYYQ SVYKYNEHVK KRPIVPFNSK SVLLNNKINE KKKKIYIYNV KYNNCCYFNI TGVLNGFPKK ISKNDLISKK KVEEIILNNL RYKKNFFFFL PLLKLKVKCK KNDGQWNEYF CPLSKIRNIY KFKKSIIHFV ENNSDKQNIE EQKKKKLIEK KKELFLNDNI EKKYLSIDYI DEKNETSDIL LKVHIKSKLR EYYYDLCVKE YKEKKLLENK YEYSYLNDVP INNLINYIDK NEYMKIFLKY VNDDIIKVYK SVKGLHLIGS PRLLNNVDHL CITKFDDILL KFSIDKYPTI IFQKPYINLD IKVKIPPYEK GTAFKEFLKI VENKNDVIEE TDK…
	PF14_0284 / PF3D7_1430500	conserved Plasmodium protein, unknown function	MSERLYKKIK SMECESNLYI SNNKVLFESI YNLINKGVPV PSIYYTNNKI VDKETDRYVV TKYIYDVDDI IYKLEAHSKI NLEKFKNIKI KCLEEEYLKD NEVEDSYKDD KYNQLDSLQI YVSHTHFDYI WNEYTMQYFL SCYHDEDNLK IHTHILEKEE FGYDLQIELY EIPTNPMQAF QIASHLSKIR EALQCGPLMH FFLTKTNITE NIFEKFIIRK NEVIFILKKN DYLLVLISIH FVDSYDQFII LGLCKNIHLT NKSMDLSGNL DCSFYTDFPS HLITSEFFIY NYEDDMHNYE QNKREGTEDN EDIDMDHNKN VDMERMHSMN SSGNIIINSS SINIEKNITN EENIETKKYQ KET…
	PF14_0342 / PF3D7_1436100	conserved Plasmodium membrane protein, unknown function	MIRTRIVFER IFFLIIFSGI VYFFLDFMTV YESSIRYLSF LLLLFIYGVS YILAIIPDIA NSINYISFYK TRKKKVLSYS FKKDIFCEKK KKKKISNKDL EIHNLIDTNF FYINPGVIEK EYYEKKNEFN DAYMYYLKHI KYMQKRDRKH GDQTNTNNYI NSKEGMNDED FNSNINNRVH DNINYKKDRK EDIYKNDDNY SDNNMYGMNK KENKEHKKYI IDNCEEFEKI CFNDQGKKIK IKDKIIRYIE LSNNNNKNNN SNNNNNNNNN NNNNNNNNNN NNNNNSNSVN VKKIDEKENS HVNQNNYVLE EGNKKTKKNV SYKSYAYDEK TRKVQNIYEI HNEGLSIYNE MIGKHDNSLM HYK…
	PF14_0351 / PF3D7_1437100	conserved Plasmodium protein, unknown function	MYIFIVIIIY TVSSIKIKRN IYYINNNILK NLYSNTNILK SHNKINITKE ENYLKKLHSN ISKIGNNIYK NINPFNIAVT IFTFCSLIGL LFKDLIKGKK DNIKSNQSND ENLFKYMCAK CNLVIYPAKG REQKFLKDDY ICPNCGKSNM DKHNLIKK
	PF14_0404 / PF3D7_1442600	TRAP-like protein,sporozoite-specific transmembrane protein S6	MNFFSIFIIL NFFMLSLTSS LGNGFLHSSI TFSNDFCKGM NLHFLISAEE IDSKFFLNKM LLLILGGSSY MRYSKENYFS VSIYDKKLVY KNIKKIENIQ GASYYEQLQS AFKKHIKPSA RRTNLYESLK EYYEKYIIGN KNIKKSKNII IIVKKFTSDD LSEYHENLNR YIKEIRSKDV GIYFFSDDSI YSKNIILNIS ESGYNMEVQY PIAHFVSESY RANDLFGVKK FCYQLLHGAT CKSYNEWSEW SGPCEFERRQ RIIPLKITNI ESTNFRSHYD PSCRNVFDYS MSIKEDFRVN CKNSIYECRG ICDKGYKFKP YAKSNEIVES YEECNDLPPC TRDQRKNGDH TLYADVILNS LLS…
	PF14_0422 / PF3D7_1444400	conserved Plasmodium protein, unknown function	MSVEEPYSEI NIIKKYYNFK NVERKKLDDD EEDKIINLIV FFKDKIEIDV NEKYEYNIDD ENIIKNILIN YVKTLKILIF YIPYNDSIKK KITEKGIYKL LFLGNYNKHV DIYQNKLRNN KCQNVEDGNN IFSLYKEEID KYELIFLINL ITHNENNIEI FKYLYPFYFY YIMVFEKQEK DTIFMLLNNF IINEETYIYI SKKEDFSFLL FLSVLDSLKN IKNKAIICNY FYVFIENCLK NECKLFIHIY ETLRILYFNF YSYSSKLEDL NFPLKKIKLK ILTKKDNKYY LLKYISLMCK LLLETLYNIL DSKNLDLEKI DGYKNLYKMI MNEIKENINY INTVNYFDKY DDTHILKYYK NVL…
	PF14_0435 / PF3D7_1445800	conserved Plasmodium membrane protein, unknown function	MFIHSCNFYL FLLFYFIFIN CSYIHFRKEK SNMNNHKNYC YDGSIKDACI HVKENPSSYD NNNIEHMNQI WNNSPTNIIN TKKVSNVEQN LQKDTKKYDL HDRNYPNIIK EEENIFLLTC KKFVNFTIQK RFFVVLSILI GFLLLMLVSI PLYETMISNK IETSFVTFDN SLKYIRNIYP LTFEIKKAGD VLTQSSDKLG NNTNHFINIY KKDKTATLMF FSENNNNKEN HILDYNTLKD IFFLLQYFKQ ITILKDQKEI YWKDICKKYD TPLSNPKCFV LGLFTISELT NINYNNIEKW NVFFDKIIKE DTKYIKRFFS QALYFLPNFL YIPNHFIYKI EEQQNMHNII NKIYTNIKGL LFV…
	PF14_0440 / PF3D7_1446300	conserved Plasmodium membrane protein, unknown function	MKVLILFFIF SFFHIIYVLF VYASLNIKTR NVFPFDVVEN NYPHFPQNIS FVEENVDYKN YCFTIYYNNK TNEQKVTKNI TKESITRVNF ISYNTVQDIQ EKKQYKRNIR EQKKKNEKEK NMNNSVKTKP NILIWKIKQN MNKIYSFYYL RMFFENHINY NNIYFGQYNI YPFNNDAMFI QNINSNNIYC KNGYHFIYKT NKIENTIENS PCGTHKNFFL VYELYEHQIP KYLEKIYTFK KILRTPKENI PFINTYEIYI SSCDKIKECD LSNENYCSSY HEKIYNNIHM KYNNINLYKN SKRRKKKKKG DKENDLLDNK KVKNKEKSTS DKELTNSLPS RYPCVFCMKK GIKYDNKYIN IIS…
	PF14_0447 / PF3D7_1446900	glutaminyl-peptide cyclotransferase, putative	MENDKLINKK KDSKEETLDK IEKSFRFIRK ALVLTIVIVL LVIVASVFLI LHFINSAKEG NIFPYGIGIY TYKVLNTYDH IHDPLVGKHI KNENILNIRR DDKHFPFTQG LFFSNNETLI ESTGLYNASY LREFDLLSGK TIRFHNLESK YFGEGTTLVI EPSTFRKFLF VLTYKEKKIL VFNYETFELY HTYYNELDGY GLTSNVDPLQ SKEDLRQNNF PLYQKLWATS GDEYLYELDI PPNLKDTDKL SVVNKKKIKC AGFHIYRVNE LEYHPKTKSI FANIFLTDLI LQIDVDTATC LKIIDLKGLI ERCSNYKQIK NKLETVLNGI AIRPESRQDE LPTLLVTGKL WSNIFEITFV RNK…
	PF14_0470 / PF3D7_1449400	DNA replication related protein, putative	MDRNCNYMNK IINSKNRRHY SMHPENAIFF DYFINLKKKA IAQGYNNLVI SFKKIISSIT KYPLPIKNSL DAYKLKGVGK RFSNYFEKAL SQSKVDKKIQ NLKEDFISSK SEFRINIHIN KVINSADKFL KDFDKEIYNI RVLGELSDDN ILNNIREIEN DNLCNVNSKN LNQCTLVSSN KLNESYSNGK SLSLCTNNIE KVTSLNNNKK KKCIDMNDTE KSIITYLYKY GHLYNEHALS KEEIISGVLK YYERSIVVNY KTLRRLINRE FIEKTESVEN RICNNIKSSK IKTKLKVINK IRLTKKGKDF LDNEKDYILD CSLINTENIY QLNNTKEEES MLHTENVKNM ISQYSFNTDN ELK…
	PF14_0498 / PF3D7_1452300	DER1-like protein	MNFILYIAVI IIYLTNIHCK NVYNIKKLSG KNNYKYNKIS NNVKRLSNMN PPYYKRKDYL NIRMNKKTIQ NFHTTNQNIH YKKFKNFVNK SKNKNKLYYL YIPNNDTNSI KGKKNKQNNK VLEIYFQQKK LLAQYFNNLK SSFIYKLKNT KIITKLFLSS SLLILTLNVI GLKPEDIALH SKRVLRAFEF YRIYTSALFY GDISLYVLTN IYMLYVQSNQ LENILGSSEM LSYYISQISI LSIICSYIKK PFYSTALLKS LLFVNCMLNP YQKANLIFGI NINNMYLPYL SILIDIIHAQ NLKASISGLL GVTSGSIYYL LNIYLYDNYN KKVFKIPKFL ETYLDSYDTI EIIQ
	PF14_0533 / PF3D7_1456000	transcription factor with AP2 domain(s), putative	MNEYSVYNKP NSNNISVSKG TSRIFKKIKT NKNYGSLAIK KETHNELNGN TKRNVSDKLI YENETKTMIN NNNNNMNDNN NNYRLDILTG SEEYEKNDIS YVQEDSDIME HIKLEGNEID YEKMVYGNDK ERSKEKKKIN NYDKNIQGIK IEEDINEYKK VKKCDVAKNR VKRLELVIDI EEYNDNKLEN ENLLQKNYAK NISSDEKKYY YNNYIFNDDL YNGKLNCLTK TLDFLAKEEH INPNGNLDDQ EDSESVCVIE KRTIKNSSSC DEKELIEKIN LKDNYVFFNN NNKEKNKNKL KDKNKTNKIN KRKKPNHSKT NDNDQTEIYK KTKKMNNKNN NGKNKNNHMN VLENFNAKHN MNS…
	PF14_0566 / PF3D7_1459300	conserved protein, unknown function	MIPLFKIGIV LIRQVSKPIS GYIKKKAIDN KNFKSICIYC GKKYYFFEQY IQKKFYNSNT TNINYSSYIS ENKSVNVGSE ILGETIIFLV AALIIIAEYK RNSLKEAKKE FILNHKLETL KLQVLELQKE NDEIMKIVMP TKQNIRNNRS YDIENKNFFK DIYNKYVSKQ NTISQNNKEQ NDNNSIKQN
	PF14_0607 / PF3D7_1463900	conserved Plasmodium membrane protein, unknown function	MLMLYLHILL CIFLNNPVLV TNENNFFIKI LRSQEKKIEN EVSLYEKLNN RILFEGSDDF SNLDKLKSLL SFQKKIDNTI RKKQKEENKL KKFQQAIKNG NNIYPVGNNP QGFEKKEREE KEQEKTYMNN VINKINEQKG NYYEPNKNIN NKYTEDLTSN GLLYNKDKIK NQFNNPHQEK FIRKHEHERE HEGKNEGKNE HKNEHKNEHK NEHVHVHEHN SKNYEGNPPK NEYPNINFTN ILNSIDFYKK IDLVKNYFGY NNNETLNQNM KEQKNMQNHH VENEKNNMIQ ANNQVDENQN NHQYNNNFHN QKNDNLKQDT KDNSSEQTYN NSNNNIEDNN HIKFFISKDI EKKKNKQNDI NES…
	PF14_0696 / PF3D7_1472800	conserved Plasmodium protein, unknown function	MSHILRGIIY IQVITFFYLF HIIKCVHIIS YNNARKKYAS FMFNNENIFL YDNKRSRSYT FIKCEKTFEF ILKNKNKKKI KNCIKSKPDE KEHHEIDDLD PELDNLIKDI ENGKYGEESL KLFKEIESNS KAKEEEEIKR LEEQDKKIDM KNVDEVINKT DDKLKQCAMK AFYNTEINEK QNPDVKKEYD IMQKIEKTFD EIEDDNYPED KLTITNIYDK IKTMKIDNKP KKNPFTDTAK SLLKYKGLLH MPFEKGPLLN NNTFDWRESL EYIELNIPIY DETNCEDISF HFKNDYIKLE INKGNTKELL LDNMLCGKIS YPDAYWVISN EYKENKKYIN LIIPKLSGYY YIWEKLLQDG KET
	PF14_0712 / PF3D7_1474400	conserved Plasmodium protein, unknown function	MEKNKKKKSL KGKVRNKEDV KNDKNILKKD KNNKDSSHGT IINTSDKDKD ESKTKVLRED NIFKNTDNSA TFYDKTSDVI NVLYDYKNSN LKSSQNKDKD IISSNHEDII NNTLSISNKL KNDDIFEKSM LLVNNKLECE DTITLLEKDI NVNMNDYDNS SEIIKYMENF KEKKKCMDNV TFSMGYKKED NKEEGKEKEP HELKMKIEEK ETISYKSKKK KKMEKYHISN EEKEKVMKKY MLNLEEKYRK KKEEDLKKIV DKNKEDMKKF KEKENTFVNF LKNPRLNLSK DENLNDYLSI YPKTIQFVDI RKNEIFIKEL LITNKSNILL HIIIIPPTSK QFYIKEIINI YNKQEENEKS NLN…
	PF14_0729 / PF3D7_1476100	early transcribed membrane protein 14.2	MKLIKVYVFL FIMLMIGLLG CGNVCNELKE KKNMLLKENP DKLLNKKRRK KLVYSVIGTL SAILGIAIFG MGINSHFKEK KKTIWDEVGK DIDSILNRTI AVGIWKTRKN YKNEIEDIEK IIPSQEEIQK ILIYQIENKN IKITDGYMKE IQSLSKYVLY NIRNSMRNYT KTLSYYS
	PF14_0730 / PF3D7_1476200	Plasmodium exported protein (PHISTb), unknown function	MCIRYINIIK IMKNININEN SVFCYRKYYR KCNEIMNNSF NVKCDLRENE KLNKNKFPRL LVSYFYVLSI VGIIYCLLFN IHTHGNKDEG LVSTLCIDSR CLSEGYLNLY SPLCSNNPYF SFREILHGSN YYIPKEFMEW DDEEEKNGFQ FDEDDEEDEE DDGDDDDDDD DDYDDEDEEE EDMKKKNYKN VPTKIDVKKP NNTNKVCDNK NSHIKNNTQQ EEKNKNTTNQ KSDANNKIHE NKKKVEEEEK HKKEKNPNEK ENNDNNKNKN EKKNGKGNQG NNKDLPAYKT IDYNNLSVQI SLEDFQAILN SLDSVLSAKE MHNLWNQLRG IERFLFEDTV SDLFTVYHDL LETYNLTAKE TEH…
	PF14_0736 / PF3D7_1476600	Plasmodium exported protein, unknown function	MKVSKTRLFL YMSFICLLIR CLILFYICRI IRKKYSVLRT CNVRNSRILS GPRKNFFFGS CNTNNIINDL EEILRDEWDI EVDNILRDDD TSTFHGNTSS SENSNYLSIN AIHRIHRGDD TNIFEENDVV SVSEIVESLH DSDEIDHTDN IDNINSMNNG QNEDVDYSDV STCATESSLS NHDTENYNAS PNTSDDNVNA DISNDHSRNV ERIQNTYNLF IVRPNTCQNS YPLMINIVNE HGEPCDRHPN IRNTVGHYEM EYIRHQSRED MNTLYEYALI RFPIYNENKD MCSLDEDILY ERNFLKDFEL LKSKSYDMFI DIHFRLRKGI QCTDMLSIFS FDNNYGYGYY YNNNFSTDGE QNN…
	PF14_0742 / PF3D7_1477100	Plasmodium exported protein (hyp6), unknown function	MDKHNCYVFI SRKIKFFIQI LFVFTIFISS NTLYKSLSPN TYANIYITQN RILTESYTNN NKSLKTSHIK KNTKRNEIKY DKDINNLNTD SQSHNNISTE NNNLESLLGE YHEEMKEINK RNEKPFFKRA LYLMDCFDNI YIDKLIDQNV HNKSSPIAQH VTENSVFLSH ACSIFTAIPI ITYIVKRFDY LERY
	PF14_0753 / PF3D7_1478100	Plasmodium exported protein (hyp13), unknown function	MSFSSMKLIL RTITYIVLLL LHYDTFKKLY IKNNCQKIYT KITYSRSLAE YDTLVVINQQ TANNNSSSNS NNSNNETNEG LSFFNEILGT ELALYNSKWN ESNKIDKICT HIKKYKYDII NTDYKKVFTN EKNIIHKYMK NIFENKNVDC KYFFGKINNS LDNLKNKVIY IFSNKNVLIP TIYSILFKII NSIFTIITGA ITSVVLTQLF YLIKSLWSVN PLLSIFLLTI SSIFIFMIAV IAHALNS
	PF14_0762 / PF3D7_1479100	Plasmodium exported protein, unknown function	MNFINFKIYI FFILFHTFIL SNTNIPRTNN NKNNNQKNVT NDTTPLGTIK DIIALDYIRD LLKHIELIKD EIIKDKLKKI KLLKNNKNLI KKIENLEKGL IATRLLCKNY IKNELKEIKI IKDQIVNEKI QQYRGKKEKL IDTELNKLFL QEKMKKDKKK YEQYMKKQLQ NTLLQKGILK TNGIILKILQ KINNLFIEIT NDNPKVQLTS
	PFA0385w / PF3D7_0107700	conserved Plasmodium membrane protein, unknown function	MRINVCFLNF FFFFFFFFVL FLNTNECFQQ EEKLKKLKKL LNKKIKFDIN EKHKNGYKNT RYSFIYIHEL TLIDYVDYVL NKSSEYDCIL FYINVESSNN VSKLDRKTLI LLEIFNEVAR QIIFNNFVLY NESEDVLLLN KEIRNEDIET KYVNNNNNNN NNIYETKDHN DKHKKNDFLL LKPVFFFYIN FNKSHMNPIK HVHMIYNLPE FVYVHDKTFD NIDYQLIIDT KYMLEYYIKD IKKIDYNHTE INNKMLETYF KEFIYLHNKG NWNKINEKNP EEKEKVFITL LIIFLFLFLY LFVLILQKCN FLIFLCSYFL YFICLSGLFH CLINKSELYN TSKNLDSFFH KYIYRSTNSQ YIC…
	PFB0855c / PF3D7_0218300	apicoplast RNA methyltransferase precursor, putative	MNTKCLNKYI IIILLFSLII KRYTSLNRYH NVCKIKNQSC FLNPCTHKNN DKRNSYLYTH YTRNNSSINI RRNNFLDKQN DNISDYIYGL NSVYAVLKKN ERTIEEVIVN KNIKLNRKIH KQNYEYIFDE LKKRNVSIQY MEKYKMNELV GGFPHNDIIM KTHYRYMNNY KDFIKNIKHL PNKNNIFICL HDVYDNMNIG NVCRSIFFFG GHTIFLKKKK KVNEKKNNVK IDTPILHSSV GSSEFLNFYH INNMANFMNH MKLNGFTIYS TSCHKNNTSC HKYINLNNIK IRENEKILII LGNESKGLKE DILENSDYCV YINNLSYNEN TQFHIDSLNV NNVCSIMLNH FYSI
	PFC0075c / PF3D7_0301500	Plasmodium exported protein, unknown function	MNNQHLIYRS VLIKYFPKEK GKKYFFFINI IVYCILTVLY DIFPNITFPN YIFVNTKDIV IYNTRVIRSL YEEYHFNTIK DKILLNDLIK DDLIKNDIKE DHIKKSDIQE EDLKSYENFT YNLMKNEEKQ DNLIKEDIIV NSSNNDNIII YNSYEENIIP DFTYEENILQ DFPYEDNIIQ DFTYEENILQ DFPYEENIIQ DFPYEDNIII NNSRDDYLIE EGINENSFVT VDLNNSMINE TNDVDNEKDK VKMIIYSYIK KMDSCKKDIS HKKFGKCRDE EDER
	PFC0215c / PF3D7_0304700	conserved Plasmodium protein, unknown function	MKRLFLLIYA ITIFSIYLIN GAIKNESYRK KKSLMSIIFG NLLTKYKRKK KSSLNSSKSE SDSSVPTELE DQVNYEIYRN ENISNEDEED IARDECNKLY DELYEERDKD DNYEDTYDNN NYGMKKITNR HILNLHLGEH VPMENKKHDS VKQVILFQNY YKDNIINEHS NNIRKDEYSF NSIYHPKEKE KEKEKVKKRR PKSMDFESKS YGTFKEENDQ KKKKNRWSTI GFSRKKINNF DYIDDINVSY FSYEEDNKSE NKEKKYTQEF YGVTGIFAWT YEDALILNTK PTRTQSSPHI TESNVKEEYE KKNYDDEIDL FYNCIKEEKK KREMEKEEKK QKEKQNIDLK NKNGNDILND EDL…
	PFC0575w / PF3D7_0313800	conserved Plasmodium protein, unknown function	MYLKNVYIYI SSCFILFDLC FSFHLLKMKY KNHMNNMKSV TFFLRSPQIY RKRFKRSRIK NVSFKKKQKK PLFLFENLKK GFSFLGFWRN QYDQKYIDDV ISNINNLTRI KQVTHKKKSN EFTKENIKQI LLHCVFSKID FKIINNLSYI IKHFQMSNIT VHSILNQISE KVKEKKDAEN YLALHLFLLK DENITLFSMM HIMDFFKSKQ KVIECIRDIK KRIYEECVGD LIRKKIERYN LYCEKKKIKF HMKDAIKKME INMKDDDLYF NYHYDELLRC FTMKLNIERN NKNIIRSNYD NINNDISIDK DMYMNNPIDV NINNISLDEK IKEQFENPDD ENLKELKDTY EQFQLFNDNI IKY…
	PFC0810c / PF3D7_0318300	conserved Plasmodium protein, unknown function	MNNIYISLYI FFISYIIQLC FNTKYIYCDK KLYVSKNILP SVEKKEFVSN VPHKLEWLVH NILEVVHFLE DVNNYIVDFK KDILTKLEHI VQDDTELYES YEYNENLLNQ IYLNNEKKLK RYSEYIEKLK DTKLQMFEDT INNFQRENIY YLNFVYKNLL AKIDLITNLN KKKLDKEKKK NVIELKEYLE DLKKRMFDMQ KRLNDIIITK STFLKNESEL NMKLFETSAI DYVNNNSNFE VFSTYIINDF MLNKKRINVL NYDSNLFFKN NFMYFNFLHN YLKEKKDEHV LNVYIYLKDP LIQEYELNYF NYYVVLDLYI LDVIIKNVDL LIEKKGKKRK NVNHILVCID NYVVKYNVLS SNI…
	PFD0555c / PF3D7_0411200	conserved Plasmodium protein, unknown function	MYLLCIFLYI LSFLCFTICI KRKQNVSKRW QFFIPHINKE GLYNIMDKKI IRVNKNKRFH RNVVCSNRLS EFIDRDININ NKMKNIKELK KKHIDNNILI KADIFSNIIE KKNNSNLFFK KFCSFINMEY DETTKDLEEL KINKRLKNNN NDNNNNNNNN MYDNKSNNIH NNNNNNSDNL IKCIKKNQDV LQLVEGYWLL TLKNKYMFSF LKKKKKIIFS VSSGVDSLCL LYSFIFVIYK ILISMIYKNK SYFGFMNKIN SVYSFTHEDI IDIIKEYRYE NNVSFFLSIL SKIIVIYCHH NTRKECTSEM YFLKNICKKF GIHFKSKKLT EKSIQKLNVI NLKTKKKNYE SNVNKKININ MMK…
	PFD0690c / PF3D7_0414100	conserved Plasmodium membrane protein, unknown function	MKYISILIVF FELYFILNFN VTSCFQLKRN TPFYVYNRNI ISCIKKNERN KKVLNLEKSV KDGKCVKNLN INKNEIYKDI ESYLKNDASI SSNKNNDINN LNDITFTNFV SISNDWNNIV IEDGNNKDIR KLTDFLFKEY KRAYAYIDEK ARNINNIVNS EKIKSLLDKF GSILIDDMNI DEFYKHIEMC FLLLNNCKDN YISFSLIKNE IINIVNQIIK HSQKFLRDEQ ICKKMKNDFM NIHNLIKEIK KNDIIKMNIK NFMSVINSNI VLNNNNIFYF LTEIFSSLNF LMKDNPQLIY EYDYIINPHF FFLCIFSLYS YNLSKTRFYY FLLLIHNQFD LKENVAKYDD NMNYNRYKNS IIN…
	PFE0670w / PF3D7_0513500	mitochondrial matrix protein, putative	MLPFRPLSQF VFQFLIITST ALGKAFIQAY REIIKNKHNT HFIKEKYNPC MNIEEALNIL NVDKTKIYKN LNKEELMSLK DEITNRHLIL NKLNEKNGPY NGSAYIQKKA RIAKDILFQH LKLQ
	PFE1075c / PF3D7_0521400	conserved Plasmodium protein, unknown function	MLRLIKVLFL LFLFWKKGYS IKKGIKRNAS FYHILYYLNK NKKNDPSVFE CNKRERNIKN YTSQNINIHN NVNSLKHKNC YTLNYNPFFF VHNDFKKIWK RKNVKKYTKL KSHNEENISN NEYSSSMQVK DINLENKMTS NEMNNETTHN LHNNNNNNNN VDDINKKNVD NFISDNISST HDDKKVLTQL DDSFKKKIEK EIISEKIANE QNEVIKKVKL PIIGTQLKPS GGFTKEILQI IQESNNYINE VNKEIINEKI QNKISGNDLS FFDTDETLER HELNYLNKIY DNNHILNIYN FLLVWKQRKN IDLSVFVSKL SEHSNILPGE RTVIKFSEVE KVQFLKKIRK NRNVSIAMIF VDN…
	PFE1330c / PF3D7_0526700	conserved Plasmodium protein, unknown function	MIRLIFLFII DFFIGVIIIN VFFFEYVKCQ GKFVNTKKEF PKIKNISNTF KQIKFFAPSK KKKRNYLFLS KHNFKKNNDN GISSSNKKKN FLLKYQTRNN VMYRIICNHN LLILNNTSFL KPTKLTIYNY DAPKNDLSAN DPEKGGRKSK ALPTNNLNDK KEENVLPTNN LNDKKEENVL PTNNLNDKKE ENVLPIDKAN DQNDNVTLPV NNLNEDQTNN LSLKKNEETK NKDISENNDT WKKYLEDKRK KEILKDLENK RNKNNNCNNN NIKKKKKNYN NEYMKNIKKY TYNNNNNNNN SNSNTCDIIQ KNELSGNDEI IKDQSNYSND HNNDYYEDDD NDYYEDDDDD YDDDYDNDYD NDN…
	PFE1525w / PF3D7_0530500	conserved Plasmodium membrane protein, unknown function	MLKFIYIHFF YVYILLCLCC GATSFSCFYG EYFKNNKCYP CGENNYSSYK NSEGCFKCPP SSFHKKLGAK SIYECICDTN YYLNYLGNSC DRCVDFNNNI SSSFYCKEGL NILNIDNTKL FSVHNKENIT FPDMVETCYV TKDIRNIYPY INNIFIYCKR PNICLNTCGV CATRYEGFLC DNCIDDYYKN NIYIKYSNCK KCYSSIIFIL FIFLVYSIII VYFFMCIIHK CINISLYFYH NNIYKEGTIY FLHYFREFIF YLSLMLILAL SNDLTESERE NYNILSIRKN EEMSYNLHNG DIRNHYYMNI YIHNLFYDFI KLLFLHFLNL LPIKCFIKKN IENDKKVHVI SQIDWIQFFV GIY…
	PF07_0081 / PF3D7_0719800	conserved Plasmodium protein, unknown function	MIIHKKLIFL KILIVIFLFY TKYYICFFFF VNNTKWCWHK LEGKNFRVFV SRPAQKKSNQ LKTKIIINKR KKEENAKSNI RKNDFKSSSQ YKLIEELINE YPYKLTYTNL KDQPFILLKD KLNPKYIKGY ELPFNLINPL KYELLKLIGK ICDPFKPLCC YSLTPKLFID KMFKNKPSIT YNDFCYNIEY KFKFYMPSYT QIFKFEKELL WKLFMTVRNL KEVSPYTPLN DHERLNKILE DNETTLPITI SKVNKDINRQ GIHPSILNMF FDFLNIEKIN NCLKRDNAFL KLESIKNQIK NRDFMEGIRP DYLYIMFSKN ANQYYSNFNQ KQYEKQFLEA INYNTTAQKI ITENSIYKKK RTQ…
	MAL7P1.157 / PF3D7_0728800	conserved Plasmodium protein, unknown function	MICLIFYVLF VLLLQDIIIW KNINVKCYLK RKESSYIKCN FNLIDNYVKR KNFFFLNNKS CWRYKDKGNE YERKLKYTHI DIKNKNRKYK LKMNTKNMVK EVVKDIQGVW KFFLPVYIMD REFKRAKDMN PDENYNDINK NTYDDNDDNS NTNDEMDDEM NNKMNNKMNN KMNDKMNDKM NNKMNNKMND KMNNKMNDEM DEDVNNNIYD LEDNENTDMD INNKNNSDDE NNLNLLRGER LQPLPMFVYN YENIVSASDW TYAYWSNEYV EKNIFECTIK IINKMNSKYM ILLQGYLFLS DINALNDKNI RLVPAQIFTN IFLAHNDNID ESSSLIPPNV KVYDKNGNEV KDVLSILEKK DPE…
	MAL8P1.25 / PF3D7_0825800	conserved Plasmodium protein, unknown function	MKGRQSLSFL LLSVPYFFLF LWNEDIKCQS LLPVSYASHQ MYSFDKLTPH EIKSDLKKTF GNFISSKIQV LKNKFKLYDI KNREKYNNEE GNDSDLIGDA YISSLEDEIK HLLEQAENKR MLSKKIKSSY ERAHKNLKKR RNVEDDGKMK NVLKQNLQHI DYLNKKSDYL EKKAGELKNI LERRGNENAK EGNDNDEKNI YNNEYHNNCS ISKRGTLKFI NSSNGLKHSI DNVNGMINEN GFTIFYKNKK KMTYFWSVLE LPIKMIGSIE QCFYFIYKNN NQIFCADNKI KAYSWMNSLS EASLCFHFGI KGVLINSNIN NINKNDDMNN TNDENVKHSD FMNNISNGIK QGKKNKQKKI DEN…
	PF08_0047 / PF3D7_0820300	conserved Plasmodium protein, unknown function	MEEKLIQTHI TLLFYLILLF YLKNFTISFI DVPKKLFNYI KVYYSFLILL TILGFFSKLL VLIRIFITHN INKIFRLLLR NNVNFECIKN HIRFNKSRKK VNYKDEKKLI TNVVYNKSIN SDNKNNSYNN NNNNNIQTSN NTGRKRFYLF INKNADQQNN AIFKKSNPDD LITTSIRERH QGDGSNNSTK QKRSKKRTKL LKKLKILKRD DNKQNEEHDE DKDIKDDNQN NDYCSDDHEG NENDDDNNNN NNNNIYMEEN KNVNKNNLKC KKHANSSHEN YTETLCEECD AMINLKNKII KKNEINMNDQ DSDETFEDNK DSLTELGFNK SINEKNFYLF SLLSNILYNN TSNCSNVKKK KDG…
	PFI0900w / PF3D7_0918400	conserved Plasmodium protein, unknown function	MCIYFFLFLF IITSCNNNNI KYYKINDKKN EKRNNTSYNY NNYNNNNNNS SLNTSVSIYM DKDYEYLVHT SEKNNRLICV KKEYNDLIYY THDNDCDPQN TFSFSFNSTF KFDDHFYMTY KKNKESFIEM NITPSLAIGS CINCLFLDEM NLLSIYGYTF IYNKSNEYEY KNYYKKIIDL YHNNSEEYSN DSDVVWNIPV VINMIKADVD KKKKKKYNKN KGHLDSYNYN KDHKDMDKYN KRIYRNSLGL AATTFGDVRN GLSKDKWSDR NKIISKVESE PNNSYTNYDD IHLYYNNCQG NNNFQGHHKC GGNISYHQED NSKENLPFYY YENSILKKFL KENRIHYAYD EIGKDKIANP NMS…
	PF10_0026 / PF3D7_1002200	tryptophan-rich antigen 3	MQINPMEKSS FVQTRIFPPK PTIFSLEKND DFLNTHNEGF LILSYCFAIS LFMYIVLKNL YYLYIFKRTR IKIIESLNND NNVENEIEEM KRVKNLIMEQ VIHELMRKSI ISKRRTRKDI ETDLSQNVRN EDMNLKENEI EMTQVETLKH LIHNNLLTEF HDTKEKNLES FIKFLQQLMT LEKNEKEFSN NILVKDLMDY IINIGKKEIQ KSNTQLSQNS SQNYIPSNEN DIYIFQIQVI KELLKNNIII THSNDGKQLD DEIITKILEE SLMSQANVVE YFYIEMIKNI LGNDYNELNN ISYTHDDLYL QKYEKELIKK KLSQYAYKNM NTKQNNKYVQ DKTVNKHIHK NQIEQNENTT NLI…
	PF10_0055 / PF3D7_1005300	conserved Plasmodium protein, unknown function	MFWNYNFFLK NCFILSFHIL IIFGISTFLN LLPTFNVKGD IKSKKKRKKE KKKKGKMKKH ISEKFSKGLC CLFDILLRNL IYNLYYAFDQ IKENNYIRNV ENEKTKKQIC IKNLDKSKKN IEKCINLSLT VLRIMQGNKN YFIQHILDNY ASIKSINVEK KNKNKFDDSH LMYNMYKYSF PLKEAYKNSF FYDINMDEEK QIFIKNRHIK AYTNQFNIID TFIDKHKKYS KEDLINELNN LLHIHYLNDS TMERENIKKE NPKTKDNLID DDLVTNDLFS EYFNNCKKSN KLNILIKEVN LNSLKNFHNI LYKNINFIRT FNEIKDDENS DMKNIELAEI FHM
	PF10_0197 / PF3D7_1020400	methyltransferase, putative	MSFIYRKAAS MLSKCCQGKG IKEILYEKDD PSKKKLHYLL YKTLEDLNIL NEIYNMFLKK VCKNKYLGLI LLSVLVHRKK IDGGGLIKRE IKKKEKDIMK YYEEYKDRFN HDEKLKEGII KKYFIIYDEK YEDENLYKDN TKCIKNMESI RNLENKCTLF NNDLSNNKSE HIINELMKKN IHIEMDEDVE FLYKINNKDV YKLINHYIYK ENKIRIIDKT SCLVVQAANI KRGMIIVDVC SSPGSKAIFS RTLLNKKGYL ICIEKDRKRC YTLLKELLKN KEYVGIYMDE NFDDTQKITL NKKSFFHNEK ENTKQNKAKN VYKNMDNNSK MDVQKNVYYI QHINKELFIK IYNCDFFNLT SQD…
	PF10_0246 / PF3D7_1025300	conserved Plasmodium protein, unknown function	MLLYFVIFIW SFLLCDIYET LNIRKSIDRK LTHLNNNIEC ALNISNYRNK KSKNLQFIGN NKIVKKCKNK YSNKVHLFGF SSKEEINNKG KKSLNIEKYE YKNGNIFLYT KLFVNNEEKK FIIDLCSDHS FIFEKRLNEE LLKCNNNNNN NNIFTQNDFE QKSFPKNEGL NLQYEKKDIE NIKELFHLNN TQVDIKKVVN IKHEKEKQFP FYVINNEELD MNFYGIIGFN FFKNYDTFVL DTIQMKILLN WNEDGINTED PNYDNIEYEK QKGNGEQDQK EHEYYKINLY DYFNNIKYFN IYVDNHLYKG IVDTGTLNTI LLNNSNIYNT TTDYNNKDTK TSIIIESVLK NKYKVNKTNI NHI…
	PF10_0359 / PF3D7_1036700	conserved Plasmodium protein, unknown function	MIPKNKLSDI CTTLTLEKAK EDIEKECKLV EKKKQKHDDE KDEGLIVDGN EENNVGENSD EEEIRKWREK RLMEFKKKRE LKRDGVYTEV CEKDFLPCVL KNNNVVCHFY DNSFKRCDIL HSHLIKLANK HLATKFIKME AKNCLFFMNK LNIKVLPSLC LFIDGVLIQT CVGFEDFGNN DNFKTKDLEM FLYKKKIINN MECSDSDEDI
	PF11_0055 / PF3D7_1104400	conserved Plasmodium protein, unknown function	MKTNIFSCVI SFFILLLFCK AYNTSSLLET IKHDLQIVNN SNFNTVVNKF RNEKVFAVLF FKKSNKNIKN VIKNYNDVAS KFKGILTLCV VDCDENASLC ENELSLYVPD YKSSNTHHFL IYPINPMPKF VFKDEITESN IKKYTYLIPS KIDIIKDTQS FNVFLSKHEN MPKVLIFSNK KKPNYVLNAL SNSFNKKLMF AYINNENEEL VAKYNVKNLP TILLLKKNKV VDTYKGKQNY INIFDWLNVY SETFVLGGGF DISPDKTNEK PWKFELIPKF TKLSHGDICF KKADKGLCLI YLKEGEKLEK SEIDMLLSLK EKFKPHIDGR GINFRFMWID IAMETHFRSL LEFKKYPSVV VFN…
	PF11_0277 / PF3D7_1126700	conserved Plasmodium protein, unknown function	MTKSICELQN KNSISTELLQ EIKKMENELK RKNDEYEKLN ANYREIYGSY ILAKTNLDDT TNNYEGEILK LETMLKEKEH EYMDLRINFQ ELLEEKCKLE NDMDNYEKAI YEINENLISL KEAHKEELKE VHEENTNLYS TIDKFKEEVE YMKENYKQLE KMNQDKINTI ENLEKEMMDM KEEKKMVGEK LDLVQSQQRM IQMEIKNLNK EKEQLKEKEE TLKNEKEKVK QCKEVLKIEE KQIDTNKQVL DKEKEQIEKN KEELKLMQQN LNKEKEQIEK NKQELDKEKQ IYENDKKNIM LKNEDLKKLL DEYKEEIMNK EGHIKQIEEK ILLLEDEKKN FQNKIDILDN KMQEFKNEIT NEK…
	PF11_0285 / PF3D7_1127400	conserved Plasmodium protein, unknown function	MMERKMKKNK FILFFFFLFT IKTVHIETRK VCNVLQFGTH AITSNKENRK YFNYEVVGII DPFDKNRVLW TRKKRNKKFN LNIFKNIYDS FFCNINDYVY LKNSDQFIYR IFHINLKNTL KYMLKYKIIS GKFNHNGDKN IMSLKENSKL FRFLNNINI
	PF11_0459 / PF3D7_1144700	apicoplast import protein Tic20, putative	MCRFLTYHYI LIFCIIIKNV FSFQPSQKVR IYHVNKIHSN NSINLNKTNI SSNVKTYYSL RKNNIINFRK RKILAYATLK NQINNIIHGE TDVTIFDKLL ASISYILPTI DAIQAFVMPL VNILPIWTHK YLFQIERINQ IYSSIPFMSF ITFMGLYFLF VKENKFKFHY FIRYHHMQSL ILSMFGYALS LFYFRVFPYS YNDTDIFNLT ILYSTMAIYF GSLIIPFFSS LLGYYIEIPV LSEAIKLHIG EKKNQKEDL
	PFL1390w / PF3D7_1228700	conserved Plasmodium protein, unknown function	MYNIVYIFLY LIVIFCLQWE SVVSISISPQ KRYSYNSLKN YIINEGERKK KIYLFNEKNN KFLFMSYMKK KKRKKKHTGR RKENLYTHKK KKRKEYYTYN NIYKDIINNL FKRNTYSKLY NNIKYKHKVI PFNKKFIYHN KNLLFYSYIY EHFLASFTSL ASQEKKKEKR IIIKKYNNNN NNNNNNRRNG KIFLDTFNSN EYEEEQEELE LDPELHESLG GCIENDFQDN YFDTLLGSSE IDYNCDEDKY DKDDVCEETK RKKYYVYGRK YTDKDYNSEH VNKYYKHLPI YSKDDSILSN KNFKRIYESN KMENLERNIR EEDLYYPSVP IKWKLYVGIF FDKKYNYENN EDKNIYDKFN INI…
	PFL1740w / PF3D7_1236000	conserved Plasmodium protein, unknown function	MSETLYNDYK NNCYEYMKTV LYTEKIIKDN NSDQNKLLNI YEKAIKSAES MFKKMQLEVE ANYMVDDKEN ELNNIYNEIC EYKVKLKKFK DEILENDKRK YERSSNNYNN NVNYDDRILL LSDVDLLEKG DVYINHSKIL MDNTEYISND VMNNLNKQRE CIKKNVSNIS FLSNKLDHAK IIIKNLNKKQ LFNKYRLYII FIFIILTFLL ILSIKYNRYV KKYPYIKTND DNDHNNQNNN IDLILENQKS IQVQNQQNTN YTLDKFNNTQ EAKSVFYDFE QKKKDKDINN NENQNKYVNI NDYQNYIYKI NTKHKYTDEN INSNIDEYNT LIDFNEIDNN NNKNQLTKLD TYYQHTHELN KNE…
	PF13_0012 / PF3D7_1302200	early transcribed membrane protein 13	MKVSKLVLFA HIFFIINILC QYICLNASKV NKKGKIAEEK KRKNIKNIDK AIEEHNKRKK LIYYSLIASG AIASVAAILG LGYYGYKKSR EDDLYYNKYL EYRNGEYNIK YQDGAIASTS EFYIEPEGIN KINLNKPIIE NKNNVDVSIK RYNNFVDIAR LSIQKHFEHL SNDQKDSHVN NMEYMQKFVQ GLQENRNISL SKYQENKAVM DLKYHLQKVY ANYLSQEEN
	PF13_0032 / PF3D7_1306200	conserved Plasmodium protein, unknown function	MKLSLVIFCI VIIFFKENIS VKIKTNDTAI FDINKVLQKK LAVLYRKGNK LNNYFFSYIE KNGKNNKCYR YIQEALYDPN IQIMKNEVMK SFNYSKDILK KTFHDIINKL FLYIKNVFLK KYFVFFLLYL INFNCDTLAS QMNDPYILNN YNLELNASPS MYNLKYEEIG IPISNSTVKG WLIKPTKKSN KLFLLLHGYN SNRQACLFFL NILKNLNIHN DTTIFIPDMK NFNERGVDDI YNILSYFKDN MGLNEVNIYT QSSTNLLVLL LSKHYKNKIA NKSKEKFIKT IIPYSTDKNK NKNTENIIYI DKYIFDSPIF NLHKTINMHF NLSDIDKKLN EERMKNKQEI NLHDKKSIMN YFL…
	PF13_0039 / PF3D7_1307500	conserved Plasmodium protein, unknown function	MFTLISVCSY LFYTHKESLL NLIGLSENRN SRKNRRRKKK KGKLKQPFPE EKLCLSDSDM RRKKFILRTY SDVNFNVTCT TKKERNSI
	MAL13P1.68 / PF3D7_1313300	peptidyl-prolyl cis-trans isomerase, putative	MVYFKRFFFH KRHRILSIFN SYFFMKKQLL NNLNKILFIS LNSYFLKLLF SKNTYIYYLQ EKKNSYLEKK YRPDTPYKKT ESGIIYRDLI DGVYDTVEEG DTVYIHYQGK TTNDFRIIES TFKSIIPPKI IAGHYDQKHI KAIYEMVIGM KKNTRRECII PPYLAHPNHF PTQPLIYEID VVRIVKKNAQ NKTTLQKLEV KLEKIIDTIC SYF
	MAL13P1.251 / PF3D7_1349900	conserved Plasmodium protein, unknown function	MKFIFLYLLI LYKIILSYCY LLKRNKVLYG HINPSSCIFF IVQHNSLKNI AYNNNNNNNF VYKKKKFSNN RNKKLCDSND DEKKQPFINN SNIFRNKYNY IPTFDEVKKD IEIFKKDYPY YFTEHSILEL IRIENNIVVI NIEGQFFEDI NVVFSEVTKY LLNKYMGILG VHPYNIRNLN IRGNEM
	PF13_0265 / PF3D7_1350500	conserved Plasmodium protein, unknown function	MKRKNIHVFF YLLILSFILY NKIINVLNFP INNGINKKDD SKIKRGKDED SNSNSSSSSS ISTAVFYLSD ERIYINEQHF TNIKLLQNIL TEHIKSNEHK KELEELGLLN IKSLLYEDFK QEIYNSMKLI FQFIKQNFYY LCKYINEEKK RNKLSANNYL SDDQIYSVIQ NKIINTNVDK NKKFGDLLNY IIKLKKIFNI SFSMNLEKEI RPIILITHVN PANNSVHINI NNNMTEESID EMKKNGSLKK DKYVEEISES ILNPIKTNSL FVKISNSLKW PLHFYRNLCY KNNYKVASEN WVSYFYDHNE TLCHVETFGT GDCLFLSLQY LLQNNGIKKN NFVENKNVKE SKFIPWYIEE VKQ…
	MAL13P1.262 / PF3D7_1352000	conserved Plasmodium protein, unknown function	MFMKFIYAWS IYILIYTKCN SYILRKKYLD NLFFVNYDTV PLYDYNRRCV IYDKANKRWK LRNQRIYKKE QNDEREKGKV NRFTRCYLLN NNEFRQYDKK LKKRRKEKEG ILFSKFDKMF KESFNEDDKL KKSELISILA CICTNIVIEF LKLKEEKKTE DFTYTFDYSV MNVLKMVNFE YDVNEELKKQ KKKKKMNKTY TSLYGEIKGG GNKKIDDYND NIHMKKNEDP TINNSLFNEE RIGANDKIEM FEETKEINID INNKNTKEEN ELLDMYIQKL EFNTLEMNEI KTYIDLFFGK NTYEKVFVKN NININKIFDV LHTALFDKTQ ERENVMQLQQ FVDNQEKKLN EKKINVRNIN TFN…
	PF14_0155 / PF3D7_1415700	serine C-palmitoyltransferase, putative	MHLKGLMDYN YFLGLEVLQN FDIVNYLIAG IVLLALILAV FNEDASAGSP RLSWVLGEFL PIQHSIFALN SNVEKKLFRK RSSKIYTFIT CLYNLFVELR NSITEGNFIM LVKGWFLKVL NKIILYKNLL LLKYRSQSKR HLFYMLVKKK YNLPIQKEEN EMQSYLDAKR ELIRLNRWSF MWRVSNVKNE FLLCEKRKAR PISSYSYLDF IREPLVQNNA IQAAMEWSTG NHGPRMLGGN SQILRDLEKV VGNFFGRNDS ILAVCGFLAC MSGIVAVATH EDIILYDSRT HACVKMGIQI CGAKAYSFKH NDYNHLEVLL IKYRYKYRNC WVCIESVYSM DGDIPHLPTF KKLCIQHKAK LYV…
	PF14_0318 / PF3D7_1433700	conserved Plasmodium protein, unknown function	MIYIFLFIIF LNVYHNIICQ FCFLKKRKSV KNLLFSVCPN GNNYKRFNIY KRSTIKYDKK RKNIYLLLPN NNTKFPIIKN GNYCILNKCT YSRRWNLNDF LYNYINILKY KKNIKIGRLL KCIGYQNEYV YRKKKKKEKI RLFYILNKIS LINLKKSIRY KNNYKYNNIN IYNSNNKLCY IPINHFNIWN KETFLYNNIG ENMCNRSKKL FKNVLYYFHT LDDIKNAHQK NRNLFCLFNN YIKEEENLCN NSVLIYNIFK ASQIYNYAYN ESIKKILKEI IFLFHKIKKN NFIKTNHNKN IYEHIDVLEK DVYSNDNMLY RGRENINKIL SEDDCLLKNE NLDLYRNLSN DEKNIQLRNK KLS…
	PF14_0369 / PF3D7_1439000	copper transporter putative	MCKNIYFYII LILKLFIVLA DKSDNSICKP SVKISCAHNC CKNKLSFMYN CWKHYDKYSN IIKDNLQKEE DTVVQLQDHD NIDIVEHVET MPMSFQLTTH TIILFNKWET KSALSYYISL VLCFFFGIIS VGFKVVRLNV EQALPKTEDT NIFKSLVLFK NNSYRMLLSF VIYSWDYLLM LIVMTFNVGL FVAVVLGLSF GFFIFGNKFV SSKKCSPDDL DVHKEFTADP ACCGC
	PF14_0691 / PF3D7_1472300	conserved Plasmodium membrane protein, unknown function	MKLKSYYFYI DIILLIFILY LKRCCKGYVL NVNVVDKDDL FVFLYKNEHL LASSYYNLKP SYFFSFDEGE ININMSIHFK ENTYIKKRNI SQEVQAKSNL NSINILTHFN INEEYLKRYN FKRDYISKET SATYNDNNNN NNKENYDIIK KVYYDDKNEN NITCKEASEK LINDNLDEKN KSNNLFLVLI TADQWLNYIR LKNKLEPSLR NDENYIFTSH FNCIKRYPLD EGIIKKTIKI EQKNRYMLVL INNNKLRITL KGNVVFYDYK TKHLSYDFLF IPDVLYFTSI VLLILVIIIS LYFLRYREKS DIFMVLNMIF FLLSTYLNYK NINFIKDMGY MYMYYWISAN ILKKMQEIVT FII…
	PFB0270w / PF3D7_0206100	iron-sulfur assembly protein, putative	MNKKKLKAHF FVLYIICSCF ILILSIKHDK YNNESKKKKK FFKIRTKIIF YKLKKVNQIK NAPQLYIQFY KPKCHKTTQS LKDIFNELSG NKNPENPKNI DEYNLTPKLK KTVELFQSMP NSPYYKSQQV ILMGKKISSM PDKHKIRQNQ VLGCQSVVYI YPKVEENEDK KKVIVWLGHS DGLLTKGIVY ILTDGLSGYM PEDILKVNPN FITLTGISEF LTMSRINGYL NIMNKIKIFC TNILKNMDN
	PFE0875c / PF3D7_0517500	conserved Plasmodium protein, unknown function	MQKLNTIMNT LGENKKYVDY LIRTEQFELL AHEGLNEKNI YDIINQIKEF ELMYPDGFIK YIEKGREFLK RSQMNINEYY NYKIEKPDNL IKIKFHLTND ITFKKEDIKN NFLNMDNKLL YNNCYVNNNI LYRNKTFNHI LKRNKKKNTS YHHREILNNS HGVSSNESTP VSILSNNKKS NMYINKEYPT YVNGIRQINT HQNVKNGTYN EDKKIKYSEK GNVSDYKCGL GILNNNHQRS YEESTIFTLE QFLYYEKIGL DHIDKISFIL LAGGLGERLK HKDIKIKLFT NLISEETYIE YYCNYIRCFE KYIKKEKKKK MNIPFIIMLS DDTYEKTLCF FEEKNYFGLE KNQVHFLKQN KVF…
	PFE1135w / PF3D7_0522700	iron-sulfur assembly protein, putative	MTIHIFLCFL LILKIVNALK SNRFSSYIYT PKTFLYNNKS IPNKKLVRKF VNRIKLVDDT IKSNEHIIKI TDNATNKIKE LQKECNDDYL ILKLYVENGG CKGLKYKLNP IKKNEIEEDD YIQQFDELKF ILSIDSTSVI YIYNNTLDYS NDLISGGFKF INPNATKKCG CGKSFNV
	MAL7P1.144 / PF3D7_0726200	serine/threonine protein kinase, FIKK family	MYYSVNEWKI NKFIHSIFPK KSILIIFLIL YLRNLTKRKY NILRGLLEFE QILGRCPEHK AKKGHKKMKF RKSKNEKKNE QQDDLLKNKE DDLLKNKEGD LLKNKEGDLL KNKGDLLKNE EGDLLKNEEG DLLKNKGDLI KNKEGDLLKS KEGDLIKNKE GDLIKNKEGD LLKSKEGDLI KNKEGDLLKS KEGDLIKNKE GDLIKNKEDV LLNKGYNILQ NKNDNLLQNE YYNLLQNEQD DNQLKGNTLI TTKKEDKGCM KKTHENKAEC EKNEDKNCMK KTHENKAECE KNEDKNCMKK THGNKAEDEK NEDILLMSPT KGNNLWTRLK KGFSRGMCMN FLLNDNNEKK LSTLYVTNML KNQ…
	MAL8P1.138 / PF3D7_0805000	alpha/beta hydrolase, putative	MGNVLNRIIF NGPTEGYYEK FDLDFIYIET ENNEKVAAHF INRNAPLTIL FCHGNGENVY MLYDYFYETS KIWNVNVFLY DYLGYGESTG TASEKNMYLS GNAVYDYMVN TLKINPNSIV LYGKSIGSCA AVDIAIKRKV KGLILQSAIL SLLNICFKTR FIFPFDSFCN IKRIKLIPCF VFFIHGTDDK IVPFYHGMCL YEKCKFKVHP YWVVDGKHND IELIENERFN ENVKSFLNFL YNSDL
	PFI0230c / PF3D7_0904700	bacterial histone-like protein	MYVILYCVLF LFQVVYSRRA FINVHKNNII NNKLSVNNPY NKNALYQSSS KIPMSQAITK KQIIEEVSME TKENKKTVEK IMNGIFDNIY KHLENNEKIY IHKFGMFYNI FRKKRCIKNL RTKEDIEIES SHMPHFKFSK VFKELIKQNV KVKKGKGVST NDHDLDEDDM NMDNINESFK ENVNEKLIY
	PFI0670w / PF3D7_0913700	conserved Plasmodium protein, unknown function	MIYWKLLLLF GTILIFLNKK NNVKNIKLIE KKKKNLYDHQ FYEIGCVKTA KRKIPSLYLF KNVNSYNKIN KRKQNKLFFD RNGINVPEDV AMFGKTNVYY IRESIYDKNK NNLIPNEVES EYIEELDNHN DKNNVDNINH GDNINQVDNI NQVDNINHGD NINHGDNINH GDNINHGDNI NHGDNINHGD NINHGDNINH GDNINHGDNL SGHVKSEHIN TNKPSTPTSS HNNTKEKERT EEDSIFTYIN KDRDYVTQVG NSPSINIYER TYKADSKYLY KQFENVNEVN LQLLKNVKSI DEKEKLINKK VMEKVKEDIK RFQECDEIMD IKGRIIKPNT DLKHKVKEDS SKKNTNTHDD MDE…
	PFI0920c / PF3D7_0918800	dihydrouridine synthase, putative	MQIKFPFLYV IIYILLIIIK LNHGNSKLNY NKTYTHGRVY NNLVHTVNQY NKKRSKKEIE NKYIRNKNII LPSSNTEGRN IYISYLNKQY NNNNNNNNNC YYKNNTKKRY IKKKNYKNFY YYIYCFNTST NSTFLQKKIN IQNYIYKKIL KCSNMSILSE KSIENVISPC EKKYKLEDII SNGINYDYRK INEKSTTPFI QVAPMINVTN RHFRAMVRII TKRAQLWTEM IVDNTLLYNL NNLEEHLGFD NNEHPIVCQL GGCDMNSMSE AAILVEQAGY DEININVGCP STKVANKGAF GASLMKNPEQ VRNIVYEIKK KVQIPVTVKI RTGVDNYDSF DFLKTFIETV SSVGCNHFIV HAR…
	PF11_0211 / PF3D7_1120400	alpha/beta hydrolase fold domain containing protein, putative	MASYSKDSDL GECIKYVHLK EDKKEEDNLY SNDKDVEYFE NLFDYEYDED DEESTGGRRF GLTFFILGCM TICGFRGRMV KKMAFVPPII KGYNIENDNK FIFHNSHHEE IKELMQINNI DINYKKLKRG STEVSVIMLY KKPLDLNKQT ILYSHGNTTD IGYMTPFLLN LVTSNNVNVF SYDYSGYGLS NKDPSEKNCY KSIKMSYDYL TKDLNIKPEN IIVYGHSLGS ATSCYLINLK NVKVGGCILQ SPLYSGLRLL LPLDYKKEMP WFDVFKNDKR LKNIPLLPLF IMHGKNDRDI PYQHSEYLLK IVKKNFAKKV QKNKSQFLRN KKINHLDVHD SILRFWGVEN ADHNDIDEKN PEL…
	PFL1775c / PF3D7_1236700	s-adenosyl-methyltransferase, putative	MLTFWTCLIF VLFLDIYDCF KIKNFEYPNT HPVYRNCSIK KCNSLHKGYY NSRTYQIKKN VQEPNEQTNK FDDTYIYHTP VLLREVIYYM MKDEENSSVS SFDQNMNDNR DTKCYSNNIN SINNNINSIN CSNSSKSQGY ILEKTWCHLN NNMNRSSRSI KNCSFLNEKK DIEYIEECSE NFNSKNTNNL CKNSYTTNYN NEQVNYYIDA TLGGGGHTLE ILNKIPNCRI IGIDKDIEAL YYNKIKLKRF INNNKLKLIH GDYGNILHLL HLHSLPIFNY YSGILIDLGV SSHQLKCCDR GFSYKYNGIL DMNMNKYTES QYLSKLFRND NEHINDINDI KKNPKNSYNK LHNILNTYSL KKL…
	MAL13P1.172 / PF3D7_1333400	conserved Plasmodium protein, unknown function	MNETLKSSSD RNMINQNKAN VVDELVKRKD EICSWCFDTL YYELKNEKYD YVPPILQKLH KGGFQIPIFV KWMKLYDKKD MGSYDYDAYE LKGCIGCLAD VDILEISYYA IQSSLHDTRF LPITLKDLPY LIVSITYLYN FEDCKHVYDW VIGKHGIKIN FTINQKKYSA TFLPEVAIQH NFNHETTVKK LIRKANYRGE INEELLNIIQ VQRYEGISSS LTYQDYQKFK SSQNKRNA
	PFL1060c / PF3D7_1222000	conserved protein, unknown function	MKIFFFLLLL VFYLCGYCLS RMFRFNFIKN NTPRIKKQCQ HNTTSNIKRE VEKLFCSRNN NKECEVNTFY GIKEKGFRTN RAPPYLLNFK NCRDILAYTN DIDKDCLLQI QNLARLDIIK GHITILPDVH LGKGIIIGSV FLTKDFIIPN GVGVDIGCGV LCIKINNLKK KDLNEKIINN IYNKIKRNIP LSFDMHDQGV FDSKNIFSNL LNTYGSPNIK GIVQPKHFKQ LGTLGGGNHF IEIVYDASDD LNKTQKEELS IKDETNNIYV HNNVHDNMFN ENDISQKNCA INTSLLNAKG NRNHISNNNS VDKKNEVLTE YNYSNVYKDI SLNNKNDDLS DVYILIHSGS RNIGKSVAEF YDI…
	PFA0055c / PF3D7_0101100	Plasmodium exported protein (hyp5), unknown function	MNFFHVIILD VGIVICLYLI IYKNSDIKWK KHINCCKYHF YFFSSKRCLL QHMVEEPFEK KDKSGVLLKD KNTEEGRKKE RQKPMSIKSI NKKKKKNNNN NNNNNVLKNL NNEEINKQRN MTNERIRNKN KNDKGVENIS SNTQMEEKNI ICKDINSNVI LNQNEINDDQ MVQKIKENFV KDLMKNENKE IFKQIETINS VGTMAKIKNS LYSIIFKGSN FWKGLGIYLG TLSGATLGQL ILAGILQFGT FSVMNFSIYF SAVPSFIAFS SFVGIILLSI IIVICLLVWL WPSRGKLMGK DKTENKSDT
	PFA0060w / PF3D7_0101200	Plasmodium exported protein (hyp4), unknown function	MNYFLSLFNV SLFFLLIFKY SYKNIVKKDL QDKFNKSIIT INIASRILTE NNKKWYKKYI YTSIFSGNKN PQKRERKNEE ENQKDNTKVD NDNNMENEME NHIDDSIDDP MDDLMNDKWE HHNSLEDRIK EYYTLTDPSD GEENNSFFKK LKLIMNILDE VHSDLLINNS VTDGSIFSPE LVPISVLSTM TLACPPIGTV TLPYITNRIN FLNRYEGQNI HTEHDLKIFK
	PFA0610c / PF3D7_0112800	Plasmodium exported protein (hyp11), unknown function	MKKSYTFINV TILLFLTLLL FLTYYNYDTF SKTKFNNNIK IDINRFKRII AEASEEQKYP WEEDFCLILN EEELIRPEHN DSPYLPEHYE NIDKINELSI NSTKIWKETI KKMRQNYEKE TDNMNHNWRD FMWHYKWANI YLYKVHKLIN ITLKDLTNPI HDKEETITTW IKWIQEDIEY FLFNLQVEWL RILTLELFYK NKE
	MAL7P1.58 / PF3D7_0713100	Pfmc-2TM Maurer's cleft two transmembrane protein	MFHYFYKVYI FTIIICASNL FNNDGVEIGT YKLSYHNGGR QFRMLAQKNE NEKSNGNTLK NTLLKDENKK GSKTKKLDPQ ITSLVNLVDN MDINEEQKDK IKTLTLEYIN SDDIKKKNKS INELKKYSNN EECKEHMNNY LMHLRMQNEI KYLKRKNFWN NIWIVVITLL SIILLIAAMA MNTFPGFSAF LVTFVLSNLM IYMFARFYPE IKVQFKKFKE TCTNLFKKKS K
	PFA0700c / PF3D7_0114500	Plasmodium exported protein (hyp10), unknown function	MSFYYFKLSF ISILLCILII THKFSLEQIT HNKSNNFNII NVTHRRLLAE PHKSHILKTH KGENSMAQPI VNKLRENHTE CPKKSSSIKL KKILILVSLF TLPCSFFCFQ
Table S1. List of apicoplast-targeted proteins with predicted aminoacid (AA) sequences
