# Supplementary material for: A Systematic In Silico Search for Target Similarity Identifies Several Approved Drugs with Potential Activity against the Plasmodium falciparum Apicoplast
Source: PLoS One. 2013 Mar 26;8(3):e59288. doi: 10.1371/journal.pone.0059288 (PMC3608639; doi:10.1371/journal.pone.0059288)
Supplement: Table S2 — Predicted targets list. (DB: DrugBank; TTD: Therapeutic Targets Database: DS: dietary supplement or nutraceutical. TDRT: Tropical Disease Research Targets; Blank cells denote that no data was available). (XLSX) [file pone.0059288.s002.xlsx]

## Sheet: Plan1
FUNCTION	GENE DB ID	ANNOTATION	STITCH SCORE	STITCH DRUG(s)	DB TARGET(s) (ID)	DB E-VALUE(s)	DB DRUG(s)	DB DRUG ID(s)	TTD TARGET(s)	TTD E-VALUE(s)	TTD DRUG(s)	DRUG TYPE(s)	TESTED PREVIOUSLY?	TOXICITY (DB info)	TDRT DRUGGABILITY
Replication, Transcription and Nucleic acid metabolism
Replication, Transcription and Nucleic acid metabolism	PF3D7_0203900	5'-3' exonuclease, N-terminal resolvase-like domain, putative			DNA polymerase I (P00582 - DPO1_ECOLI)	2e-12	Azeleic acid (Azelex,Emerox 1110,Emerox 1144,Emery's L-110,Finacea,Finevin,Skinoren)	DB00548				topical antimicrobial	No	Oral LD50 in rat: >5 g/kg
Replication, Transcription and Nucleic acid metabolism	PF3D7_0305600	AP endonuclease (DNA-(apurinic or apyrimidinic site) lyase), putative			DNA-(apurinic or apyrimidinic site) lyase (P27695 - APEX1_HUMAN)	8e-24	Lucanthone (Miracil D,Miracol,Nilodin,Scapuren,Tixantone)	DB04967				schistosomicides	No
Replication, Transcription and Nucleic acid metabolism	PF3D7_1223300	DNA GyrAse a-subunit, putative	0.99-0.71	Quinolones (moxifloxacin, ofloxacin,Levofloxacin,ciprofloxacin,Pefloxacin,trovafloxacin,gatifloxacin,garenoxacin,norfloxacin,clinafloxacin,nalidixic acid)	DNA gyrase subunit A (P72524 - GYRA_STRPN),DNA topoisomerase 4 subunit A (P43702 - PARC_HAEIN),DNA gyrase subunit A (P43700 - GYRA_HAEIN),DNA topoisomerase 4 subunit A (P72525 - PARC_STRPN),DNA topoisomerase 4 subunit A (P0AFI2 - PARC_ECOLI),DNA topoisomerase 2-alpha (P11388 - TOP2A_HUMAN),DNA topoisomerase 2-beta (Q02880 - TOP2B_HUMAN)	e-50	Gatifloxacin, many others(Tequin,Zymar)	DB01044,DB00537,DB00467,DB00817 and many other quinolones	DNA gyrase, DNA gyrase A subunit, DNA topoisomerase 4 subunit A, Topoisomerase IV subunit A, DNA topoisomerase II, alpha isozyme, DNA topoisomerase II, DNA topoisomerase II, beta isozyme	0.0-2e-011	ACH-702,A-62824,CBR-2092, Ciloxan; Cipro; Cipro XR; Cipro XL Ciproxin; Proquin; Ciproflox; Ciprofloxacino;Cidrax,Gemifloxacin (Factive),Grapafloxacone(Raxar),	antibacterial,AntiInfective,Agents,Quinolones,Antibiotics	Yes		0.8
Replication, Transcription and Nucleic acid metabolism	PF3D7_1239500	DNA gyrase subunit b, putative			Same as above plus DNA gyrase subunit B (P0A0K8 - GYRB_STAAU)	e-50	Same as above (PFL1120c )+Novobiocin	DB01051					Yes		0.8
Replication, Transcription and Nucleic acid metabolism	PF3D7_1304100	DNA ligase 1			DNA ligase 1 (P18858 - DNLI1_HUMAN)	4e-118	Bleomicin	DB00290				anti-cancer	No	Excessive exposure may cause fever, chills, nausea, vomiting, mental, confusion, and wheezing. Bleomycin may cause irritation to eyes, skin and respiratory tract. It may also cause a darkening or thickening of the skin. It may cause an allergic reaction.	NA
Replication, Transcription and Nucleic acid metabolism	PF3D7_1307600	DNA-directed RNA polymerase alpha chain, putative			DNA-directed RNA polymerase alpha chain (P0A7Z4 - RPOA_ECOLI)	1e-08	Rifabutin	DB00615				anti-E.coli	No	LD50 = 4.8 g/kg (mouse, male)
Replication, Transcription and Nucleic acid metabolism	PF3D7_0727300	DNA (cytosine-5)-methyltransferase, putative			tRNA (O14717 - TRDMT_HUMAN)	1e-14	Pentamidine	DB00738				Antiprotozoal	Yes	Symptoms of overdose include pain, nausea, anorexia, hypotension, fever, rash, bad taste in mouth, confusion/hallucinations, dizziness, and diarrhea.	0.5
Replication, Transcription and Nucleic acid metabolism	PF3D7_1332600	apurinic/apyrimidinic endonuclease Apn1	0.84	berberine								Antibacterials, antifungic, antiprotozooal	Yes		0.2
Replication, Transcription and Nucleic acid metabolism	PF3D7_0111500	UMP-CMP kinase, putative			UMP-CMP kinase (P30085 - KCY_HUMAN)	8.9e-22	Gemcitabine	DB00441				Antineoplastic Agents,Antiviral Agents,Radiation-Sensitizing Agents,Antimetabolites,Enzyme Inhibitors,Immunosuppressive Agents	No	Myelosuppression, paresthesias, and severe rash were the principal toxicities, LD50=500 mg/kg (orally in mice and rats)
Replication, Transcription and Nucleic acid metabolism	PF3D7_1344800	aspartate carbamoyltransferase			Ornithine carbamoyltransferase, mitochondrial (P00480 - OTC_HUMAN)	5.2e-16	L-Citrulline,L-Ornithine	DB00155,DB00129				Dietary supplement,Micronutrient,Non-Essential Amino Acids	DS	Not Available/Oral, rat LD50 = 10000 mg/kg	0.3
Translation
Translation	PF3D7_1413400	40S ribosomal protein S9A, putative			30S ribosomal protein S9 (P0A7X3 - RS9_ECOLI)	3.3e-09	Doxycycline,Lymecycline,Clomocycline,Tigecycline,Oxytetracycline,Demeclocycline,Minocycline,Rolitetracycline	DB00453,DB00618,DB00254,DB00256,DB01017,DB00595,DB01301,DB00560				Anti-Bacterial Agents,Tetracyclines,Antimalarials	Yes	Symptoms of overdose include anorexia, nausea, diarrhoea, glossitis, dysphagia, enterocolitis and inflammatory lesions (with monilial overgrowth) in the anogenital region, skin reactions such as maculopapular and erythematous rashes, exfoliative dermatitis, photosensitivity, hypersensitivity reactions such as urticaria, angioneurotic oedema, anaphylaxis, anaphyl-actoid purpura, pericarditis, and …	0.1
Translation	PF3D7_1137500	apicoplast ribosomal protein S14p/S29e precursor, putative			30S ribosomal protein S14 (P0AG59 - RS14_ECOLI)	7.5e-15	Tetracycline	DB00759				Anti-Bacterial Agents,Tetracyclines	Yes	LD50=808mg/kg (orally in mice)
Translation	PF3D7_0602400	elongation factor G, putative			Elongation factor G (P13551 - EFG_THETH)	8.7e-75	Fusidic Acid	DB02703	Elongation factor G,Elongation factor 2,Elongation factor 1-alpha,Elongation factor 1-alpha 1	3E-75-1e-008	Fusidic Acid	Anti-Bacterial Agents,Protein Synthesis Inhibitors	Yes		0.2
Translation	PF3D7_0907900	peptide deformylase	0.74-0.73	Nevirapine,VIC-104959,calpeptin				DB00238				HIV, antibacterial,neurodegeneration	Yes	Symptoms of overdose include edema, erythema nodosum, fatigue, fever, headache, insomnia, nausea, pulmonaryinfiltrates, rash, vertigo, vomiting, and weight decrease.	0.8
Translation	PF3D7_1367700	alanine-tRNA ligase, putative			Alanyl-tRNA synthetase, cytoplasmic (P49588 - SYAC_HUMAN)	2.4e-176	L-Alanine	DB00160				Dietary supplement,Micronutrient,Non-Essential Amino Acids	DS		0.5
Translation	PF3D7_0509600	asparaginyl-tRNA ligase, putative			Probable asparaginyl-tRNA synthetase, mitochondrial (Q96I59 - SYNM_HUMAN),Aspartyl-tRNA synthetase, cytoplasmic (P14868 - SYDC_HUMAN)	2,5e-48/1,5e-17	L-Asparagine	DB00174,DB00128				Dietary supplement,Micronutrient,Non-Essential Amino Acids	DS		0.3
Translation	PF3D7_1357200	glutamate--tRNA ligase, putative			Probable glutamyl-tRNA synthetase, mitochondrial (Q5JPH6 - SYEM_HUMAN),Bifunctional aminoacyl-tRNA synthetase [Includes: Glutamyl-tRNA synthetase (P07814 - SYEP_HUMAN)	6,2e-62/6,2e-09	L-Glutamic Acid	DB00142,DB00172				Dietary supplement,Micronutrient,Non-Essential Amino Acids	DS
Translation	PF3D7_0416100	glutamyl-tRNA(Gln) amidotransferase subunit A, putative						DB00818,DB00599	Fatty-acid amide hydrolase	2e-05	1,4-bis (malimido)xylene,1,8-bis-maleimidodiethyleneglycol,1-DODECANOL,2-arachidonoylglycerol,2-fluorophenylboronic acid,2-methoxyphenylboronic acid,3-cyanophenylboronic acid,3-methoxyphenylboronic acid,4-cyanophenylboronic acid,4-fluorophenylboronic acid,4-methoxyphenylboronic acid,4-nitrophenylboronic acid,4-nonylphenylboronic acid,6-fluoropyridin-3-ylboronic acid,AM-404,AMPEROZIDE,AR-C70484XX,…	Hypnotics and Sedatives,Anticonvulsants,GABA Modulators,Anesthetics	No	Overdosage may occur from too rapid or repeated injections. Too rapid injection may be followed by an alarming fall in blood pressure even to shock levels. Apnea, occasional laryngospasm, coughing and other respiratory difficulties with excessive or too rapid injections may occur. Lethal blood levels may be as low as 1 mg/100 mL for short-acting barbiturates; less if other depressant drugs or alc…
Translation	PF3D7_1420400	glycyl-tRNA ligase, putative			Glycyl-tRNA synthetase (P41250 - SYG_HUMAN)	3.6e-122	Glycine	DB00145				Dietary supplement,Micronutrient,Non-Essential Amino Acids,Glycine Agents	DS	ORL-RAT LD50 7930 mg/kg, SCU-RAT LD50 5200 mg/kg, IVN-RAT LD50 2600 mg/kg, ORL-MUS LD50 4920 mg/kg; Doses of 1 gram daily are very well tolerated. Mild gastrointestinal symptoms are infrequently noted. In one study doses of 90 grams daily were also well tole.	NA
Translation	PF3D7_1225100	isoleucyl-tRNA synthetase, putative			Isoleucyl-tRNA synthetase (P41972 - SYI1_STAAU),Isoleucyl-tRNA synthetase, mitochondrial (Q9NSE4 - SYIM_HUMAN)	1,00e-21/1,8e-18	Mupirocin,L-Isoleucine	DB00410,DB00167				Anti-Bacterial Agents,Antibiotics,Protein Synthesis Inhibitors,Dietary supplement,Micronutrient,Essential Amino Acids	Yes	Not Available/Symptoms of hypoglycemia, increased mortality in ALS patients taking large doses of BCAAs	0.8
Translation	PF3D7_0828200	leucine-tRNA ligase			Probable leucyl-tRNA synthetase, mitochondrial (Q15031 - SYLM_HUMAN),Isoleucyl-tRNA synthetase (P41972 - SYI1_STAAU)	5,7e-43/4,8e-06	L-Leucine	DB00149,DB00410				Dietary supplement,Micronutrient,Essential Amino Acids/Anti-Bacterial Agents,Antibiotics,Protein Synthesis Inhibitors	DS		0.5
Translation	PF3D7_1416800	lysine-tRNA ligase, putative			Lysyl-tRNA synthetase (Q15046 - SYK_HUMAN),Aspartyl-tRNA synthetase, mitochondrial (Q6PI48 - SYDM_HUMAN)	2,8e-41/4,6e-11	L-Lysine	DB00123,DB00128				Dietary supplement,Micronutrient,Essential Amino Acids,Non-Essential Amino Acids	DS
Translation	PF3D7_1232000	phenylalanyl-tRNA synthetase alpha chain, putative			Phenylalanyl-tRNA synthetase, mitochondrial (O95363 - SYFM_HUMAN)	1e-11	L-Phenylalanine	DB00120				Dietary supplement,Micronutrient,Essential Amino Acids	DS	L-phenylalanine will exacerbate symptoms of phenylketonuria if used by phenylketonurics. L-phenylalanine was reported to exacerbate tardive dyskinesia when used by some with schizophrenia.	0.3
Translation	PF3D7_0925300	prolyl-t-RNA synthase, putative			Probable prolyl-tRNA synthetase, mitochondrial (Q7L3T8 - SYPM_HUMAN),Bifunctional aminoacyl-tRNA synthetase [Includes: Glutamyl-tRNA synthetase (P07814 - SYEP_HUMAN)	9,8e-27/1,00e-08	L-Proline	DB00172,DB00142				Dietary supplement,Micronutrient,Non-Essential Amino Acids	DS		0.6
Translation	PF3D7_0717700	seryl-tRNA synthetase, putative			Seryl-tRNA synthetase, cytoplasmic (P49591 - SYSC_HUMAN)	2.6e-105	L-Serine	DB00133				Dietary supplement,Micronutrient,Non-Essential Amino Acids	DS
Translation	PF3D7_1216000	seryl-tRNA synthetase, putative			Seryl-tRNA synthetase, cytoplasmic (P49591 - SYSC_HUMAN)	2.1e-33	L-Serine	DB00133				Dietary supplement,Micronutrient,Non-Essential Amino Acids	DS
Translation	PF3D7_1126000	threonine-tRNA ligase, putative			Threonyl-tRNA synthetase, cytoplasmic (P26639 - SYTC_HUMAN)	2.3e-155	L-Threonine	DB00156				Dietary supplement,Micronutrient,Essential Amino Acids	DS		0.6
Translation	PF3D7_1005000	methionine-tRNA ligase, putative						DB03816,DB04015,DB03799	Methionyl-tRNA synthetase,Isoleucyl-tRNA synthetase (bacterial)	5e-008-1e-004	5'-O-[ (L-Methionyl)-Sulphamoyl]Adenosine,Difluoromethionine,Methionine Phosphinate,Methionine Phosphonate,Trifluoromethionine	Dietary supplement,Micronutrient,Non-Essential Amino Acids	DS		0.7
Translation	PF3D7_1336900	tryptophan--tRNA ligase, putative			Tryptophanyl-tRNA synthetase, cytoplasmic (P23381 - SYWC_HUMAN)	9.6e-114	L-Tryptophan	DB00150				Dietary supplement,Micronutrient,Essential Amino Acids,Antidepressive Agents, Second-Generation	DS	Oral rat LD50: > 16 gm/kg. Investigated as a tumorigen, mutagen, reproductive effector. Symptoms of overdose include agitation, confusion, diarrhea, fever, overactive reflexes, poor coordination, restlessness, shivering, sweating, talking or acting with excitement you cannot control, trembling or shaking, twitching, and vomiting.
Translation	PF3D7_1117500	tyrosine-tRNA ligase, putative			Tyrosyl-tRNA synthetase, mitochondrial (Q9Y2Z4 - SYYM_HUMAN)	5.4e-29	L-Tyrosine	DB00135				Dietary supplement,Micronutrient,Non-Essential Amino Acids	DS	L-Tyrosine has very low toxicity. There have been very few reports of toxicity. LD50 (oral, rat) > 5110 mg/kg.	0.1
Translation	PF3D7_0311200	valine-tRNA ligase, putative			Valyl-tRNA synthetase (P26640 - SYVC_HUMAN)	1e-09	L-Valine	DB00161				Dietary supplements,Essential Amino Acids,Micronutrients	DS	Symptoms of hypoglycemia, increased mortality in ALS patients taking large doses of BCAAs.	0.5
Translation	PF3D7_0413800	apicoplast ribosomal protein L10 precursor, putative							Apicoplast ribosome	e-132	Several Antibiotics	Antibiotics, Antimalarials	Yes
Translation	PF3D7_1225100	isoleucyl-tRNA synthetase, putative			Isoleucyl-tRNA synthetase (P41972 - SYI1_STAAU),Isoleucyl-tRNA synthetase, mitochondrial (Q9NSE4 - SYIM_HUMAN)	1e-21/1e-18	Mupirocin,L-Isoleucine	DB00410,DB00167				Anti-Bacterial Agents,Antibiotics,Protein Synthesis Inhibitors/Dietary supplement	Yes	Not Available/Symptoms of hypoglycemia, increased mortality in ALS patients taking large doses of BCAAs	0.8
Isoprenoid Biosynthesis
Isoprenoid Biosynthesis	PF3D7_1467300	1-deoxy-D-xylulose 5-phosphate reductoisomerase	0.99	Fosmidomycin								Antibacterials, Antimalarials	Yes		0.6
Fatty acid and Phospholipid Metabolism
Fatty acid and Phospholipid Metabolism	PF3D7_0922900	beta-ketoacyl-acyl carrier protein reductase							3-oxoacyl-[acyl-carrier protein] reductase,Estradiol 17 beta-dehydrogenase 4,3-beta-hydroxysteroid,dehydrogenase,Corticosteroid 11-beta-dehydrogenase, isozyme 1,Estradiol 17 beta-dehydrogenase 1,Enoyl-[acyl-carrier-protein] reductase [NADH] 1,Enoyl-[acyl-carrier-protein] reductase [NADH] 2,Corticosteroid 11-beta-dehydrogenase, isozyme 2	e-167-3e-005	CHRYSIN, EPICATECHIN GALLATE, EPIGALOCATECHIN GALLATE, FISETIN, GALLOCATECHIN GALLATE, ISORHAMNETIN, KAEMPFEROL, MORIN, Trilostane	Flavonoids, Cushing's syndrome (Trilostane)	Yes	Symptoms of Trilostane overdose include darkening of skin, drowsiness or tiredness, loss of appetite, mental depression, skin rash, and/or vomiting.	0.4
Fatty acid and Phospholipid Metabolism	PF3D7_0626300	3-oxoacyl-(acyl-carrier-protein) synthase i/ii	0.99-0.92	Cerulenin, thiolactomycin	3-oxoacyl-[acyl-carrier-protein] synthase 2 (P0AAI5 - FABF_ECOLI),Fatty acid synthase (P49327 - FAS_HUMAN),PROBABLE FATTY ACID SYNTHASE FAS (FATTY ACID SYNTHETASE) (P95029 - P95029_MYCTU)	2e-76-2e-13	Cerulenin, Pyrazinamide	DB01034,DB00339				antifungal, antibacterial	Yes	Oral, mouse LD50: 547 mg/kg. Symptoms of overexposure include moderate to severe erythema (redness) and moderate edema (raised skin), nausea, vomiting, and headache./Side effects include liver injury, arthralgias, anorexia, nausea and vomiting, dysuria,malaise and fever, sideroblastic anemia, adverse effects on the blood clotting mechanism or vascular integrity, and hypersensitivity reactions suc…	0.5
Fatty acid and Phospholipid Metabolism	PF3D7_0215000	acyl-CoA synthetase, PfACS9			Long-chain-fatty-acid--CoA ligase 3 (O95573 - ACSL3_HUMAN),Long-chain-fatty-acid--CoA ligase 4 (O60488 - ACSL4_HUMAN)	4e-39	Isocapent,Rosiglitazone	DB00159,DB00412				Anti-cholesterol, anti-diabetes	Yes	Not Available/Side effects include fluid retention, congestive heart failure (CHF), liver disease	0.3
Fatty acid and Phospholipid Metabolism	PF3D7_1323000	beta-hydroxyacyl-ACP dehydratase							Beta-hydroxyacyl-acp dehydratase	e-123	Several antibiotics	Antimalarials, Antibacterials	Yes
Fatty acid and Phospholipid Metabolism	PF3D7_0211400	beta-ketoacyl-ACP synthase III							Beta-ketoacyl-ACP synthase III	e-115-4e-008	Glucophage; Riomet; Fortamet; Glumetza; Obimet; Dianben; Diabex; Diaformin	Antimalarials, Antibacterials	Yes		0.6
Fatty acid and Phospholipid Metabolism	PF3D7_0615100	enoyl-acyl carrier reductase	0.99-0.90	Triclosan, Butein, Taxifolin	Enoyl-[acyl-carrier-protein] reductase [NADH] (P0A5Y6 - INHA_MYCTU)	4e-09	Ethionamide, Isoniazid	DB00609,DB00951				Antibacterial, antifungal,	Yes, but Ethionamide not tested	Symptoms of overdose include convulsions, nausea, and vomiting./LD50 100 mg/kg (Human, oral). Adverse reactions include rash, abnormal liver function tests, hepatitis, peripheral neuropathy, mild central nervous system (CNS) effects. In vivo, Isoniazid reacts with pyridoxal to form a hydrazone, and thus inhibits generation of pyridoxal phosphate. Isoniazid also combines with pyridoxal phosphate; …	0.8
Fatty acid and Phospholipid Metabolism	PF3D7_0815900	lipoamide dehydrogenase, putative			Glutathione reductase, mitochondrial (P00390 - GSHR_HUMAN),Glutathione reductase (P06715 - GSHR_ECOLI),Thioredoxin reductase 1, cytoplasmic (Q16881 - TRXR1_HUMAN)	7e-25-7e-14	Carmustine, Nitrofurazone	DB00262,DB00336				Tumors,Bacteria, trypanocidal	Carmustine tested in early work. Nitrofurazone not tested	The oral LD50s in rat and mouse are 20 mg/kg and 45 mg/kg, respectively. Side effects include leukopenia, thrombocytopenia, nausea. Toxic effects include pulmonary fibrosis (20-0%) and bone marrow toxicity./Rat LD50 = 590 mg/kg; Allergic contact dermatitis is the most frequently reported adverse effect, occurring in approximately 1 % of patients treated.	0.3
Fatty acid and Phospholipid Metabolism	PF3D7_1344600	lipoyl synthase			Lipoic acid synthetase, mitochondrial (O43766 - LIAS_HUMAN)	5e-22	Lipoic Acid	DB00166				Nutraceutical	DS
Fatty acid and Phospholipid Metabolism	PF3D7_0511200	stearoyl-CoA delta 9 desaturase, putative							Acyl-CoA desaturase,Acyl-CoA desaturase 1	2e-52	Isoxyl	Anti-TB	No
Fatty acid and Phospholipid Metabolism	PF3D7_1119000	acyl-CoA-binding protein, putative			Transient receptor potential cation channel subfamily A member 1 (O75762 - TRPA1_HUMAN),85 kDa calcium-independent phospholipase A2 (O60733 - PA2G6_HUMAN)	3,4e-09/2,9e-08	Menthol,Quinacrine	DB00825,DB01103				Antipruritics/Antimalarials,Antinematodal Agents,Antiprotozoals,Antihelmintics,Anticestodal Agents	Yes	Menthol, DL: ORAL (LD50): Acute: 2900 mg/kg [Rat], 3100 mg/kg [Mouse]. DERMAL (LD50): Acute: 5001 mg/kg [Rabbit]./Oral, rat: LD50 = 900 mg/kg; Oral, mouse: LD50 = 1000 mg/kg. Symptoms of overdose include seizures, hypotension, cardiac arrhythmias, and cardiovascular collapse.
Fatty acid and Phospholipid Metabolism	PF3D7_0504000	cation transporting P-ATPase							Sodium/potassium-transporting ATPase alpha-2 chain,Potassium-transporting ATPase alpha chain 1,Sodium/potassium-transporting ATPase alpha-1 chain,Sarcoplasmic/endoplasmic reticulum calcium ATPase 2	3e-08	Gallopamil (L-type calcium channel blocker, that is an analog of verapamil)	Verapamil analogue	Yes		0.5
Antioxidant
Antioxidant	PF3D7_0729200	1-cys peroxiredoxin			Peroxiredoxin-5, mitochondrial (P30044 - PRDX5_HUMAN)	2e-16	Auranofin	DB00995				anti-Rheumatism	Yes	Oral, rat: LD50 = > 2000 mg/kg. Symptoms of overdose may include diarrhoea, vomiting, abdominal cramps, and symptoms of hypersensitivity (such as skin rash, hives, itching, and difficulty breathing).	0.2
Antioxidant	PF3D7_0623500	Fe-superoxide dismutase	0.70	Paraquat								Herbicide	Yes
Protein Folding
Protein Folding	PF3D7_1443900	heat shock protein 90, putative	0.80	Geldanamycin								antibiotic	Yes		0.3
Fe-S Cluster Production
Fe-S Cluster Production	PF3D7_0727200	cysteine desulfurase, putative			Cysteine desulfurase, mitochondrial (Q9Y697 - NFS1_HUMAN)	2e-108-6e-71	Rifabutin,Nedocromil	DB00615,DB00716				Anti-TB, antiinflamatory	No	LD50 = 4.8 g/kg (mouse, male)/Side effects include headache, nasal congestion, ocular burning, irritation and stinging, unpleasant taste, cough, difficulty breathing, noisy breathing, shortness of breath, tightness in chest, wheezing, conjunctivitis, blurred vision, change in color vision, difficulty seeing at night, increased sensitivity of eyes to sunlight.	0.2
Fe-S Cluster Production	PF3D7_0623200	ferredoxin-NADP reductase, putative			Nitric oxide synthase, inducible (P35228 - NOS2_HUMAN)	3.8e-07	Dexamethasone	DB01234,DB00125,DB00155,DB01110,DB08814				Dietary supplement,Micronutrient,Conditionally Essential Amino Acids,Non-Essential Amino Acids,Anti-inflammatory Agents,Adrenergic Agents,Antiemetics,Antineoplastic Agents, Hormonal,Glucocorticoids,Antifungal Agents,Anticoagulants,Antiplatelet Agents,Antithrombotics	DS	Oral, rat LD50: >3 gm/kg. Signs of overdose include retinal toxicity, glaucoma, subcapsular cataract, gastrointestinal bleeding, pancreatitis, aseptic bone necrosis, osteoporosis, myopathies, obesity, edemas, hypertension, proteinuria, diabetes, sleep disturbances, psychiatric syndromes, delayed wound healing, atrophy and fragility of the skin, ecchymosis, and pseudotumor cerebri.
Porphyrin Biosynthesis
Porphyrin Biosynthesis	PF3D7_1440300	delta-aminolevulinic acid dehydratase						DB02272	Delta-aminolevulinic acid dehydratase	5e-41	Porphobilinogen	Malaria	Yes
Porphyrin Biosynthesis	PF3D7_1415700	serine C-palmitoyltransferase, putative							Delta-aminolevulinic acid dehydratase	1e-30	Delta-aminolaevulinate synthase	Malaria	Yes
PT Modification and Proteolysis
PT Modification and Proteolysis	PF3D7_1311800	M1-family alanyl aminopeptidase	0.99	Bestatin	Glutamyl aminopeptidase (Q07075 - AMPE_HUMAN),Aminopeptidase N (P15144 - AMPN_HUMAN)	3,1e-26/1,7e-24	L-Glutamic Acid,Ezetimibe,Icatibant,	DB00142,DB00973,DB06196				leukaemia/Dietary supplement,Micronutrient,Non-Essential Amino Acids,Anticholesteremic Agents,Cholesterol Absorption Inhibitors,Adrenergic beta-Antagonists	Yes	Glutamate causes neuronal damage and eventual cell death, particularly when NMDA receptors are activated, High dosages of glutamic acid may include symptoms such as /headaches and neurological problems./Not Available/Not Available	0.6
PT Modification and Proteolysis	PF3D7_0804400	methionine aminopeptidase 1c, putative			Methionine aminopeptidase 1 (P53582 - AMPM1_HUMAN)	1.5e-29	Nitroxoline	DB01422				Antifungal Agents,Anti-Infective Agents, Urinary	No		0.3
PT Modification and Proteolysis	PF3D7_1145200	serine/threonine protein kinase, putative			5'-AMP-activated protein kinase catalytic subunit alpha-1 (Q13131 - AAPK1_HUMAN),Mitogen-activated protein kinase 3 (P27361 - MK03_HUMAN),Mitogen-activated protein kinase 1 (P28482 - MK01_HUMAN),Protein kinase C beta type (P05771 - KPCB_HUMAN),3-phosphoinositide-dependent protein kinase 1 (O15530 - PDPK1_HUMAN),Proto-oncogene tyrosine-protein kinase LCK (P06239 - LCK_HUMAN),Protein tyrosine kinas…	5,5e-15/6,9e-12/2,9e-11/5,4e-10/1,6e-08/1,3e-07/7,7e-06	Adenosine monophosphate,Adenosine triphosphate, Phenformin,Sulindac,Isoproterenol,Vitamin E,Celecoxib,Dasatinib,Leflunomide	DB00131,DB00171,DB00914,DB00605,DB01064,DB00163,DB00482,DB01254 ,DB01097				Dietary supplement,Micronutrient,Hypoglycemic Agents/Anti-inflammatory Agents,Analgesics,Cyclooxygenase Inhibitors,Antipyretics/Bronchodilator Agents,Sympathomimetics,Cardiotonic Agents/Antioxidants,Vitamins;minerals/Protein Kinase Inhibitors/Antiparasitic Agents,Antiviral Agents,Immunosuppressive Agents	DS	Not Available/Oral LD50 in rats is > 2 g/kg./Not Available/Acute oral toxicity (LD50) in rats is 264 mg/kg. Cases of overdose have been reported and rarely, deaths have occurred. The following signs and symptoms may be observed following overdose: stupor, coma, diminished urine output and hypotension./Not Available/Not Available/Symptoms of overdose include breathing difficulties, coma, drowsines…	0.5
PT Modification and Proteolysis	PF3D7_1469200	protein phosphatase, putative			Protein-tyrosine-phosphatase (Q9S427 - Q9S427_9GAMM)	2.3e-16	Gallium nitrate (Ganite)	DB05260				Antineoplastic Agents	No
PT Modification and Proteolysis	PF3D7_1455100	protein phosphatase, putative							Dual specificity protein phosphatase 1	6e-16	ADOCIAQUINONE B, JUGLONE, OKADEIC ACID	Inflammation	Yes. Adociaquinone and Juglone not tested
PT Modification and Proteolysis	PF3D7_1338900	Serine/threonine protein kinase, putative			Glycogen synthase kinase-3 beta (P49841 - GSK3B_HUMAN),RAF proto-oncogene serine/threonine-protein kinase (P04049 - RAF1_HUMAN)	1,9e-11/6,3e-07	Lithium,Sorafenib	DB01356,DB00398				antidepressant drugs/Antineoplastic Agents,Protein Kinase Inhibitors,Anticancer Agents	No	Not Available/The highest dose of sorafenib studied clinically is 800 mg twice daily. The adverse reactions observed at this dose were primarily diarrhea and dermatologic events. No information is available on symptoms of acute overdose in animals because of the saturation of absorption in oral acute toxicity studies conducted in animals.	0.4
PT Modification and Proteolysis	PF3D7_1201600	NIMA related kinase 3			Insulin-like growth factor 1 receptor (P08069 - IGF1R_HUMAN),Basic fibroblast growth factor receptor 1 (P11362 - FGFR1_HUMAN),Fibroblast growth factor receptor 2 (P21802 - FGFR2_HUMAN),BDNF/NT-3 growth factors receptor (Q16620 - NTRK2_HUMAN),BCR/ABL fusion protein isoform X9 (A9UF02 - A9UF02_HUMAN),Insulin receptor (P06213 - INSR_HUMAN)	1,3e-15 to 4e-6	Sorafenib,Colecoxib,Amitriptyline,Auronofin,Sulindac,Imanitib,Dasatinib,Nilotinib,Leflunomide	DB00398, DB00482, DB00321, DB00995, DB00605, DB00619, DB01254, DB04868,				Carcinoma, arthritis, Anti-depressants, Anti-infamatory, Anti-cancer,	No	Inappropriately high dosages relative to food intake and/or energy expenditure may result in severe and sometimes prolonged and life-threatening hypoglycemia. Neurogenic (autonomic) signs and symptoms of hypoglycemia include trembling, palpitations, sweating, anxiety, hunger, nausea and tingling. Neuroglycopenic signs and symptoms of hypoglycemia include difficulty concentrating, lethargy/weaknes…	0.5
PT Modification and Proteolysis	PF3D7_0808200	plasmepsin X			Pepsin A (P00790 - PEPA_HUMAN),Renin (P00797 - RENI_HUMAN),Plasmepsin-2 (P46925 - PLM2_PLAFA)	6,5e-43/1,00e-26/1,00e-20	Sucralfate/Aliskiren/ Halofantrine	DB00364/DB01258,DB00212/DB01218				Anti-Ulcer Agents/Antihypertensive Agents,Protease Inhibitors/Antihypertensive Agents/Antiprotozoals,Antimalarials	Yes. Sucralfate and aliskiren not tested	Acute oral toxicity (LD50) in mice is >8000 mg/kg. There is limited experience in humans with overdosage of sucralfate. Sucralfate is only minimally absorbed from the gastrointestinal tract and thus risks associated with acute overdosage should be minimal. In rare reports describing sucralfate overdose, most patients remained asymptomatic./The most likely manifestation of overdosage would be hypo…	0.6
PT Modification and Proteolysis	PF3D7_1033800	aspartyl protease, putative; Plasmepsin VII			Cathepsin D (P07339 - CATD_HUMAN)	1.7e-17	Insulin recombinant,Insulin, porcine	DB00030,DB00071				Hypoglycemic Agents	DS		0.3
PT Modification and Proteolysis	PF3D7_1407900	plasmepsin 1	0.9	Statine-like inhibitors								Statine-like inhibitors, antimalarial	Yes		0.8
PT Modification and Proteolysis	PF3D7_1408100	histo-aspartic protease	0.78	pepstatin (Chlorambucil)								antimalarial, antiviral (HIV)	Yes
PT Modification and Proteolysis	PF3D7_0926300	protein kinase, putative			Proto-oncogene tyrosine-protein kinase Yes (P07947 - YES_HUMAN),Beta-adrenergic receptor kinase 2 (P35626 - ARBK2_HUMAN),Mitogen-activated protein kinase 3 (P27361 - MK03_HUMAN),3-phosphoinositide-dependent protein kinase 1 (O15530 - PDPK1_HUMAN),Protein kinase C alpha type (P17252 - KPCA_HUMAN)	1,8e-11/8,4e-10/1,4e-09/6,9e-09/7,1e-08/1e-07/2,2e-06	Dasatinib,Sulindac,Arsenic trioxide,Phosphatidylserine	DB01254,DB00171,DB01254,DB00605,DB01169,DB00482,DB00144,DB00163				Protein Kinase Inhibitors,Dietary supplement,Micronutrient,Antineoplastic Agents,Anti-inflammatory Agents,Cyclooxygenase Inhibitors,Analgesics,Analgesics, Non-Narcotic,Antipyretics,Nonsteroidal Anti-inflammatory Agents,Homeopathic Agents,Sympathomimetics,Adrenergic beta-Agonists,Dietary supplement,Micronutrient	DS	Acute overdose in animals was associated with cardiotoxicity./Acute oral toxicity (LD50) in rats is 264 mg/kg. Cases of overdose have been reported and rarely, deaths have occurred. The following signs and symptoms may be observed following overdose: stupor, coma, diminished urine output and hypotension./Symptoms of overdose include convulsions, muscle weakness and confusion./There are no reports…	0.3
PT Modification and Proteolysis	PF3D7_1145200	serine/threonine protein kinase, putative			5'-AMP-activated protein kinase catalytic subunit alpha-1 (Q13131 - AAPK1_HUMAN)	5.5e-15	Phenformin	DB00131,DB00914				Dietary supplement,Micronutrient/Hypoglycemic Agents	DS		0.5
PT Modification and Proteolysis	PF3D7_1465700	plasmepsin VIII			Cathepsin D (P07339 - CATD_HUMAN),Pepsin A (P00790 - PEPA_HUMAN),Renin (P00797 - RENI_HUMAN),Plasmepsin-2 (P46925 - PLM2_PLAFA)	1e-42/4,7e-40/2,5e-38/9,9e-23	Insulin recombinant,Sucralfate,Aliskiren,Halofantrine	DB00030,DB00071/DB00364/DB01258,DB00212/DB01218				Hypoglycemic Agents/Anti-Ulcer Agents/Antihypertensive Agents,Protease Inhibitors/Antiprotozoals,Antimalarials	Yes. DS	Not Available/Acute oral toxicity (LD50) in mice is >8000 mg/kg. There is limited experience in humans with overdosage of sucralfate. Sucralfate is only minimally absorbed from the gastrointestinal tract and thus risks associated with acute overdosage should be minimal. In rare reports describing sucralfate overdose, most patients remained asymptomatic./The most likely manifestation of overdosage…
Other
Other	PF3D7_1025100	glucosamine-fructose-6-phosphate aminotransferase, putative			Amidophosphoribosyltransferase (Q06203 - PUR1_HUMAN)	2.4e-09	L-Glutamine	DB00130				Dietary supplement,Micronutrient,Non-Essential Amino Acids	DS	Doses of L-glutamine up to 21 grams daily appear to be well tolerated. Reported adverse reactions are mainly gastrointestinal and not common. They include constipation and bloating. There is one older report of two hypomanic patients whose manic symptoms were exacerbated following the use of 2 to 4 grams daily of L-glutamine. The symptoms resolved when the L-glutamine was stopped. These patients …	0.1
Other	PF3D7_1430700	NADP-specific glutamate dehydrogenase			Glutamate dehydrogenase 2, mitochondrial (P49448 - DHE4_HUMAN)	8.7e-40	L-Glutamic Acid,NADH	DB00142,DB00157				Dietary supplement,Micronutrient,Non-Essential Amino Acids	DS	No reports of overdose, however, high doses of NADH (10 mg a day or more) may cause jitteriness, anxiety, and insomnia.
Other	PF3D7_0911700	GTP-binding protein, putative			Elongation factor G (P13551 - EFG_THETH)	3.5e-21	Fusidic Acid	DB02703				Anti-Bacterial Agents,Protein Synthesis Inhibitors,Antibacterial Agents	Yes
Other	PF3D7_1252200	chitinase	0.72	allosamidin								antifungic, malaria transmission-blocking	Yes
Other	PF3D7_0924300	thiamine pyrophosphokinase			Thiamin pyrophosphokinase 1 (Q9H3S4 - TPK1_HUMAN)	2.1e-24	Thiamine	DB00152				Essential Vitamin,Vitamins (Vitamin B Complex),Anti-inflammatory Agents	DS	Thiamine toxicity is uncommon; as excesses are readily excreted, although long-term supplementation of amounts larger than 3 gram have been known to cause toxicity. Oral mouse LD50 = 8224 mg/kg, oral rat LD50 = 3710 mg/kg.
Other	PF3D7_1415700	serine C-palmitoyltransferase, putative			Serine palmitoyltransferase 2 (O15270 - SPTC2_HUMAN)	5.7e-41	L-Serine,Pyridoxal Phosphate	DB00133,DB00114				Dietary supplement,Micronutrient,Non-Essential Amino Acids,Vitamin B Complex	DS	Not Available/Not Available	0.1
Table S2. Predicted targets list. (DB: DrugBank; TTD: Therapeutic Targets Database: DS: dietary supplement or nutraceutical. TDRT: Tropical Disease Research Targets; Blank cells denote that no data was available)
